# Supplementary material for: Inner ear biomechanics reveals Late Triassic origin of mammalian endothermy
Source: Research Square preprint supplement (doi:10.21203/rs.3.rs-570966/v1), 2021-06-02
Supplement: Supplementary file 1 [file fbd414660b2682029cd2876e.pdf]

|    |                                                                        |    |
|----|------------------------------------------------------------------------|----|
| 1  | <b>Supplementary Information</b>                                       |    |
| 2  | Supplementary Methods.....                                             | 2  |
| 3  | Sampling rationale.....                                                | 2  |
| 4  | Definition of the Thermo-Motility Index.....                           | 2  |
| 5  | Discussion on the endolymph viscosity of diapsids.....                 | 13 |
| 6  | Supplementary Note 1 ( <i>Dimetrodon</i> photogrammetry).....          | 14 |
| 7  | Supplementary Note 2 (Summary of the statistics).....                  | 15 |
| 8  | Supplementary Note 3 (Divergence times and Last Occurrence Datum)..... | 22 |
| 9  | Divergence times.....                                                  | 22 |
| 10 | Last appearance datum.....                                             | 43 |
| 11 |                                                                        |    |
| 12 |                                                                        |    |
| 13 |                                                                        |    |
| 14 |                                                                        |    |
| 15 |                                                                        |    |
| 16 |                                                                        |    |
| 17 |                                                                        |    |
| 18 |                                                                        |    |
| 19 |                                                                        |    |
| 20 |                                                                        |    |
| 21 |                                                                        |    |

## Supplementary Methods

### Sampling rationale

Our sample captures taxonomic, phylogenetic, morphological, ecological, behavioural and locomotor diversity, but was constrained by the availability of material. We focused on densely sampling mammals and birds, which we used as independent models for endotherms; we used the large lepidosaurian sample as a model for ectotherms. The remaining extant specimens covered the range of body temperatures in vertebrates, but they are not the focus of this study. Our fossil sample included several mammalianomorphs, where the transition to endothermy is thought to occur. Although less accurate than the 3D sets, the 2D dataset was only used to extend the analysis to lower body temperatures, which clarified the relationship with the TMI. Predictions for the thermal regime of fossil synapsids are only based on the 3D sets.

### Definition of the Thermo-Motility Index

In this study, in the context of a single duct model, we consider the mass and damping terms specific for the common crus, simple crus, anterior utriculus and posterior utriculus as being negligible. We re-express the upper corner frequency of a semicircular duct (Rabbitt et al., 2004, David et al. 2016):

$$\omega_{2,n} \approx \frac{\mu_{(T)} \lambda_{\mu,S,n}}{2\rho\pi \cdot a_{S,n}} \text{ (Equ. SM 1)}$$

in a way that clearly separates endolymph viscosity, as the first term, from information that is provided by bony semicircular canals, as the third term. Information only available from membranous semicircular ducts corresponds to the second term:

$$\omega_{2,n} \approx \mu_{(T)} \cdot \alpha_{\omega_{2,n}} \cdot \beta_{\omega_{2,n}} \text{ (Equ. SM 2)}$$

where

$$\alpha_{\omega_{2,n}} = \frac{\lambda_{\mu,S,n}}{2\rho\pi\delta_{a_S:r_{S,B}+R_{e,B},n}} \text{ (Equ. SM 3)}$$

,

$$a_{S,n} = \delta_{a_S:r_{S,B}+R_{e,B},n} b_{a_S:r_{S,B}+R_{e,B},n} r_{S,B,n}^{m_{a_S:r_{S,B},n}} R_{e,B,n}^{m_{a_S:r_{e,B},n}} \text{ (Equ. SM 4)}$$

,

$$\beta_{\omega_2, n} = \frac{1}{\delta_{\substack{a_S: r_{S,B}, n \\ r_{S,B}: R_{e,B}, n}}} b_{\omega_2: R_{e,B}, n} R_{e,B, n}^{m_{\omega_2: R_{e,B}, n}} \quad (\text{Equ. SM 5})$$

, ,

$$r_{S,B, n} = \frac{d_{S,B, n}}{2} = \delta_{\substack{a_S: r_{S,B}, n \\ r_{S,B}: R_{e,B}, n}} b_{\substack{r_{S,B}: R_{e,B}, n \\ a_S: r_{S,B}, n}} R_{e,B, n}^{m_{\substack{r_{S,B}: R_{e,B}, n \\ a_S: r_{S,B}, n}}} \quad (\text{Equ. SM 6})$$

, ,

$$R_{e,B, n} = \frac{2\sqrt{\pi}L_{e,B, n} + 4\pi\sqrt{\Lambda_{e,B, n}}}{8\pi\sqrt{\pi}} \quad (\text{Equ. SM 7})$$

, ,

$$b_{\omega_2: R_{e,B}, n} = \frac{1}{b_{\substack{a_S: r_{S,B} + R_{e,B}, n \\ r_{S,B}: R_{e,B}, n}} \cdot b_{\substack{a_S: r_{S,B}, n \\ r_{S,B}: R_{e,B}, n}}} \quad (\text{Equ. SM 8})$$

and

$$m_{\omega_2: R_{e,B}, n} = -m_{a_S: R_{e,B}, n} - \left( m_{r_{S,B}: R_{e,B}, n} \cdot m_{a_S: r_{S,B}, n} \right) \quad (\text{Equ. SM 9})$$

In these formulae:

$\omega_{2,n}$  stands for the upper corner frequency of the semicircular duct n.

$\mu_{(T)}$  is the viscosity of the endolymph at temperature T, while  $\rho$  is its density.

$\lambda_{\mu, S, n}$  and  $a_{S, n}$  are respectively the average wall shape drag factor and average cross-sectional area of the slender portion of the semicircular duct n.

$\alpha_{\omega_{2,n}}$  represents a factor accounting for functional information relevant to the upper corner frequency that is unavailable from the bony semicircular canal n.

$\beta_{\omega_{2,n}}$  represents a factor accounting for functional information relevant to the upper corner frequency that is available from the bony semicircular canal n.

$R_{e,B, n}$ ,  $L_{e,B, n}$  and  $\Lambda_{e,B}$  are respectively the average radius, the perimeter and the area of the ellipse best fitting the projection of the torus of the semicircular canal n on its maximal response plane.

$d_{S,B, n}$  and  $r_{S,B, n}$  are respectively the average diameter and average cross-sectional radius of the slender portion of the semicircular canal n.

$\delta_{a_S: r_{S,B} + R_{e,B}, n}$  (relative duct thickness) corresponds to the ratio between the cross-sectional area of the slender portion of the semicircular duct n and its value predicted from the the combination of the cross-sectional radius of the slender portion of the corresponding semicircular canal and the corresponding radius of curvature.

$\delta_{r_{S,B}: R_{e,B}, n}$  (relative canal thickness) corresponds to the ratio between the cross-sectional radius of the slender portion of the semicircular canal n and its value predicted from the corresponding radius of curvature.

$b_x$  and  $m_x$  are respectively the coefficient and exponent of the corresponding power law  $x$ .

For an eccentricity  $e_{e,B,n} < 0.96$ ,  $R_{e,B,n}$  can be approximated as:

$$R_{e,B,n} \approx \frac{D_{M,B,n} + D_{m,B,n}}{4} \quad (\text{Equ. SM 10})$$

where  $D_{M,B,n}$  and  $D_{m,B,n}$  are respectively the major and minor axes of the ellipse best fitting the projection of the torus of the semicircular canal  $n$  on its maximal response plane.

Similarly, we re-express the sensitivity of a semicircular duct (David et al., 2016):

$$G_{V,n} \approx \frac{2\rho\Lambda_n E_n a_{S,n}^2}{\mu_{(T)} \lambda_{\mu,S,n} L_{S,n}} \quad (\text{Equ. SM 11})$$

as

$$G_{V,n} \approx \frac{1}{\mu_{(T)}} \cdot \alpha_{G_{V,n}} \cdot \beta_{G_{V,n}} \quad (\text{Equ. SM 12})$$

where

$$\alpha_{G_{V,n}} = \frac{\varepsilon_{\Lambda,n} \delta_{a_S:r_{S,B}+R_{e,B,n}} \delta_{E:R_{e,B,n}}}{\alpha_{\omega_2,n} \pi \varepsilon_{L_{S,n}}} \quad (\text{Equ. SM 13})$$

,

$$\beta_{G_{V,n}} = \frac{\sigma_{e,B,n} \delta_{r_{S,B}:R_{e,B,n}}^{2m_{a_S:r_{S,B,n}}} b_{G_V:R_{e,B,n}} R_{e,B,n}^{m_{G_V:R_{e,B,n}}}}{\delta_{L_{S,B}:R_{e,B,n}}} \quad (\text{Equ. SM 14})$$

,

$$\varepsilon_{\Lambda,n} = \frac{\Lambda_n}{\Lambda_{e,B,n}} \quad (\text{Equ. SM 15})$$

,

$$E_n = \delta_{E:R_{e,B,n}} b_{E:R_{e,B,n}} R_{e,B,n}^{m_{E:R_{e,B,n}}} \quad (\text{Equ. SM 16})$$

,

$$\varepsilon_{L_{S,n}} = \frac{L_{S,n}}{L_{S,B,n}} \quad (\text{Equ. SM 17})$$

,

$$\sigma_{e,B,n} = f(e_{B,n}) = \frac{\Lambda_{e,B,n}}{R_{e,B,n}^2} \quad (\text{Equ. SM 18})$$

99 ,

$$100 \quad e_{B,n} = \sqrt{1 - \frac{D_{m,B,n}^2}{D_{M,B,n}^2}} \quad (\text{Equ. SM 19})$$

101 ,

$$102 \quad L'_{S,B,n} = \delta_{L_{S,B}:R_{e,B},n} b_{L_{S,B}:R_{e,B},n} R_e^{m_{L_{S,B}:R_{e,B},n}} \quad (\text{Equ. SM 20})$$

103 ,

$$104 \quad b_{G_V:R_{e,B},n} = \frac{b_{E:R_{e,B},n} b_{a_S:I_{S,B}+R_{e,B},n}^2 b_{I_{S,B}:R_{e,B},n}^{2m_{a_S:I_{S,B},n}}}{b_{L_{S,B}:R_{e,B},n}} \quad (\text{Equ. SM 21})$$

105 and

$$106 \quad m_{G_V:R_{e,B},n} = 2 + m_{E:R_{e,B},n} + 2m_{a_S:R_{e,B},n} + \left( 2m_{I_{S,B}:R_{e,B},n} \cdot m_{a_S:I_{S,B},n} \right) - m_{L_{S,B}:R_{e,B},n} \quad (\text{Equ. SM 22})$$

107 In these formulae:

108  $G_{V,n}$  stands for the sensitivity, or gain to angular velocity, of the semicircular duct n.

109  $\Lambda_{,n}$  is the enclosed area of the projection of the torus of the semicircular duct n on its maximal response  
110 plane.

111  $E_{,n}$  (deflection factor) is a transfer factor linking endolymph volume displacement to cilia deflection.

112  $L_{S,n}$  is the three-dimensional length of the slender portion of the semicircular duct n.

113  $L'_{S,n}$  is the two-dimensional length of the slender portion of the semicircular canal n.

114  $\alpha_{GV,n}$  represents a factor accounting for functional information relevant to the sensitivity that is  
115 unavailable from the bony semicircular canal n.

116  $\beta_{GV,n}$  represents a factor accounting for functional information relevant to the sensitivity that is available  
117 from the bony semicircular canal n.

118  $\epsilon_{\Lambda,n}$  (area error factor) corresponds to a ratio between the enclosed area of the torus of the semicircular  
119 duct n and the area of the ellipse best fitting the torus of the corresponding semicircular canal, both  
120 projected on their respective maximal response planes

121  $\epsilon_{LS',n}$  (slender length error factor) corresponds to a ratio between the three-dimensional length of the  
122 slender portion of the semicircular duct n and the two-dimensional length of the slender portion of  
123 corresponding semicircular canal.

124  $\delta_{E:Re,B,n}$  (relative deflection factor) corresponds to the ratio between the deflection factor of the  
125 semicircular duct n and its value predicted from the radius of curvature of the corresponding  
126 semicircular canal.

$\delta_{LS',B:Re,B,n}$  (relative slender length) corresponds to the ratio between the two-dimensional length of the slender portion of the semicircular canal  $n$  and its value predicted from the corresponding radius of curvature.

$\sigma_{e,B,n}$  (eccentricity factor) corresponds to a ratio, between the area of an ellipse and its squared average radius, which negatively correlates with the eccentricity  $e_{B,n}$  of the semicircular canal torus  $n$ .

As we compare specimens of very different body sizes in this study, we need to re-express  $\beta_{\omega_2,n}$  and  $\beta_{GV,n}$  in relation to  $Z$ , a body size variable that alternatively corresponds to body mass, condylo-basal length or condylo-antero-orbital length. Hence:

$$\beta_{\omega_2,n} = \frac{\delta_{R_{e,B}:Z,n}^{m_{\omega_2:R_{e,B},n}}}{\delta_{r_{S,B}:R_{e,B},n}^{m_{a_S:r_{S,B},n}}} b_{\omega_2:Z,n} Z^{m_{\omega_2:Z,n}} \quad (\text{Equ. SM 23})$$

and

$$\beta_{GV,n} = \frac{\sigma_{e,B,n} \delta_{r_{S,B}:R_{e,B},n}^{2m_{a_S:r_{S,B},n}} \delta_{R_{e,B}:Z,n}^{m_{GV:R_{e,B},n}} b_{GV:Z,n} Z^{m_{GV:Z,n}}}{\delta_{L_{S,B}:R_{e,B},n}} \quad (\text{Equ. SM 24})$$

where

$$R_{e,B,n} = \delta_{R_{e,B}:Z,n} b_{R_{e,B}:Z,n} Z^{m_{R_{e,B}:Z,n}} \quad (\text{Equ. SM 25})$$

,

$$b_{\omega_2:Z,n} = b_{\omega_2:R_{e,B},n} b_{R_{e,B}:Z,n}^{m_{\omega_2:R_{e,B},n}} \quad (\text{Equ. SM 26})$$

,

$$b_{GV:Z,n} = b_{GV:R_{e,B},n} b_{R_{e,B}:Z,n}^{m_{GV:R_{e,B},n}} \quad (\text{Equ. SM 27})$$

,

$$m_{\omega_2:Z,n} = m_{\omega_2:R_{e,B},n} \cdot m_{R_{e,B}:Z,n} \quad (\text{Equ. SM 28})$$

and

$$m_{GV:Z,n} = m_{GV:R_{e,B},n} \cdot m_{R_{e,B}:Z,n} \quad (\text{Equ. SM 29})$$

where  $\delta_{R_{e,B}:Z,n}$  (relative radius of curvature) corresponds to the ratio between the radius of curvature of the semicircular canal  $n$  and its value predicted from the body size variable.

$m_{\omega_2:Z,n}$  is predicted to be negative, while  $m_{GV:Z,n}$  is predicted to be positive (Jones and Spells 1963).

We note that, in a given plane of rotation, the average frequency of head motion  $f_H$  is related to the average angular velocity  $\dot{\Omega}_H$  and average angular amplitude  $A_H$  of head motion, such that:

$$f_H = \frac{\dot{\Omega}_H}{A_H} \text{ (Equ. SM 30)}$$

These three parameters are also expected to be related to body size parameters, following the formulae:

$$f_H = \delta_{f_H:Z} b_{f_H:Z} Z^{m_{f_H:Z}} \text{ (Equ. SM 31)}$$

,

$$\dot{\Omega}_H = \delta_{\dot{\Omega}_H:Z} b_{\dot{\Omega}_H:Z} Z^{m_{\dot{\Omega}_H:Z}} \text{ (Equ. SM 32)}$$

and

$$A_H = \delta_{A_H:Z} b_{A_H:Z} Z^{m_{A_H:Z}} \text{ (Equ. SM 33)}$$

Where  $m_{f_H:Z}$  and  $m_{\dot{\Omega}_H:Z}$  are both predicted to be negative (Jones and Spells 1963), with absolute values expected to be several orders of magnitude higher than  $m_{A_H:Z}$ .

To simplify functional comparisons, we introduce the parameter  $K_H$ , which represents an overall measure of head motion, such that:

$$K_H = \sqrt{f_H \dot{\Omega}_H} \text{ (Equ. SM 34)}$$

$K_H$  is expected to be related to body size such that:

$$K_H = \delta_{K_H:Z} b_{K_H:Z} Z^{m_{K_H:Z}} \text{ (Equ. SM 35)}$$

with

$$\delta_{K_H:Z} = \delta_{f_H:Z} \sqrt{\delta_{A_H:Z}} = \frac{\delta_{\dot{\Omega}_H:Z}}{\sqrt{\delta_{A_H:Z}}} \text{ (Equ. SM 36)}$$

,

$$b_{K_H:Z} = b_{f_H:Z} \sqrt{b_{A_H:Z}} = \frac{b_{\dot{\Omega}_H:Z}}{\sqrt{b_{A_H:Z}}} \text{ (Equ. SM 37)}$$

and

$$m_{K_H:Z} = m_{f_H:Z} + \frac{m_{A_H:Z}}{2} = m_{\dot{\Omega}_H:Z} - \frac{m_{A_H:Z}}{2} \text{ (Equ. SM 38)}$$

which likely reduce to

$$m_{K_H:Z} \approx m_{f_H:Z} \approx m_{\Omega_H:Z} \text{ (Equ. SM 39)}$$

In this context, both the upper corner frequency  $\omega_{2,n}$  and the sensitivity  $G_{V,n}$  of the semicircular duct  $n$  are expected to be related to the overall measure of head motion  $K_H$ , following the formulae:

$$\omega_{2,n} = \delta_{\omega_2:K_H,n} b_{\omega_2:K_H,n} K_H^{m_{\omega_2:K_H,n}} \text{ (Equ. SM 40)}$$

and

$$G_{V,n} = \delta_{G_V:K_H,n} b_{G_V:K_H,n} K_H^{m_{G_V:K_H,n}} \text{ (Equ. SM 41)}$$

where  $m_{\omega_2:K_H,n}$  is predicted to be positive, while  $m_{G_V:K_H,n}$  is predicted to be negative (Jones and Spells 1963).

Accounting for Equ. SM 2 and 12, it follows that:

$$\delta_{\omega_2:K_H,n} b_{\omega_2:K_H,n} K_H^{m_{\omega_2:K_H,n}} \approx \mu_{(T)} \cdot \alpha_{\omega_2,n} \cdot \beta_{\omega_2,n} \text{ (Equ. SM 42)}$$

and

$$\delta_{G_V:K_H,n} b_{G_V:K_H,n} K_H^{m_{G_V:K_H,n}} \approx \frac{1}{\mu_{(T)}} \cdot \alpha_{G_V,n} \cdot \beta_{G_V,n} \text{ (Equ. SM 43)}$$

which develop to

$$\delta_{\omega_2:K_H,n} \delta_{K_H:Z}^{m_{\omega_2:K_H,n}} b_{\omega_2:K_H,n} b_{K_H:Z}^{m_{\omega_2:K_H,n}} Z^{(m_{K_H:Z} \cdot m_{\omega_2:K_H,n})} \approx \mu_{(T)} \cdot \alpha_{\omega_2,n} \cdot \frac{\delta_{R_{e,B}:Z,n}^{m_{\omega_2:R_{e,B},n}}}{\delta_{f_{S,B}:R_{e,B},n}^{m_{\omega_2:R_{e,B},n}}} b_{\omega_2:Z,n} Z^{m_{\omega_2:Z,n}} \text{ (Equ. SM 44)}$$

and

$$\delta_{G_V:K_H,n} \delta_{K_H:Z}^{m_{G_V:K_H,n}} b_{G_V:K_H,n} b_{K_H:Z}^{m_{G_V:K_H,n}} Z^{(m_{K_H:Z} \cdot m_{G_V:K_H,n})} \approx \frac{1}{\mu_{(T)}} \cdot \alpha_{G_V,n} \cdot \frac{\sigma_{e,B,n} \delta_{f_{S,B}:R_{e,B},n}^{2m_{\omega_2:R_{e,B},n}} \delta_{R_{e,B}:Z,n}^{m_{G_V:R_{e,B},n}} b_{G_V:Z,n} Z^{m_{G_V:Z,n}}}{\delta_{L_{S,B}:R_{e,B},n}} \text{ (Equ. SM 45)}$$

From these equations, we deduce that:

$$m_{\omega_2:Z,n} = m_{K_H:Z} \cdot m_{\omega_2:K_H,n} \text{ (Equ. SM 46)}$$

,



$$m_{G_V:Z,n} = m_{K_H:Z} \cdot m_{G_V:K_H,n} \quad (\text{Equ. SM 47})$$

203

204

205

206

207 and of particular interest for this study:

$$\mu_{(T)} \cdot \alpha_{\omega_2,n} \cdot \frac{\delta_{R_{e,B}:Z,n}^{m_{\omega_2:R_{e,B},n}}}{\delta_{I_{S,B}:R_{e,B},n}^{m_{a_S:I_{S,B},n}}} b_{\omega_2:Z,n} \approx \delta_{\omega_2:K_H,n} \delta_{K_H:Z}^{m_{\omega_2:K_H,n}} b_{\omega_2:K_H,n} b_{K_H:Z,n}^{m_{\omega_2:K_H,n}} \quad (\text{Equ. SM 48})$$

209 and

$$\frac{1}{\mu_{(T)}} \cdot \alpha_{G_V,n} \cdot \frac{\sigma_{e,B,n} \delta_{I_{S,B}:R_{e,B},n}^{2m_{a_S:I_{S,B},n}} \delta_{R_{e,B}:Z,n}^{m_{G_V:R_{e,B},n}} b_{G_V:Z,n}}{\delta_{L_{S,B}:R_{e,B},n}} \approx \delta_{G_V:K_H,n} \delta_{K_H:Z}^{m_{G_V:K_H,n}} b_{G_V:K_H,n} b_{K_H:Z}^{m_{G_V:K_H,n}} \quad (\text{Equ. SM 49})$$

211 Equations SM 48 and 49 can be re-expressed as:

$$\frac{\mu_{(T)}}{\delta_{K_H:Z}^{m_{\omega_2:K_H,n}} \delta_{\omega_2:K_H,n}} c_{\omega_2,n} \approx \frac{1}{\alpha_{\omega_2,n}} \cdot \frac{\delta_{I_{S,B}:R_{e,B},n}^{m_{a_S:I_{S,B},n}}}{\delta_{R_{e,B}:Z,n}^{m_{\omega_2:R_{e,B},n}}} \quad (\text{Equ. SM 50})$$

213 and

$$\mu_{(T)} \delta_{K_H:Z}^{m_{G_V:K_H,n}} \delta_{G_V:K_H,n} c_{G_V,n} \approx \alpha_{G_V,n} \cdot \frac{\sigma_{e,B,n} \delta_{I_{S,B}:R_{e,B},n}^{2m_{a_S:I_{S,B},n}} \delta_{R_{e,B}:Z,n}^{m_{G_V:R_{e,B},n}}}{\delta_{L_{S,B}:R_{e,B},n}} \quad (\text{Equ. SM 51})$$

215 where

$$c_{\omega_2,n} = \frac{b_{\omega_2:Z,n}}{b_{K_H:Z}^{m_{\omega_2:K_H,n}} b_{\omega_2:K_H,n}} \quad (\text{Equ. SM 52})$$

217 and

$$c_{G_V,n} = \frac{b_{G_V:K_H,n} b_{K_H:Z}^{m_{G_V:K_H,n}}}{b_{G_V:Z,n}} \quad (\text{Equ. SM 53})$$

219 are constants.

220 We note that endolymph viscosity is related to body temperature such that (David et al. 2016):

$$\mu_{(T)} = A_w \cdot \mu_{e/w} \cdot 10^{\left( \frac{C_{T_1}}{T - C_{T_2}} \right)} \quad (\text{Equ. SM 54})$$

Where  $A_w$  corresponds the viscosity coefficient of water and equals 0.0241 mPa.s,  $\mu_{e/w}$  corresponds to a ratio between the viscosity coefficients of endolymph and water,  $T$  corresponds to body temperature in Kelvin and  $C_{T1}$  and  $C_{T2}$  equal 247.8 K and 140 K respectively.

Taking this into account, we re-express equations SM 50 and 51 as:

$$\frac{10^{\left(\frac{C_{T1}}{T-C_{T2}}\right)}}{\delta_{K_H:Z}^{m_{\omega_2:K_H,n}} \delta_{\omega_2:K_H,n}} c_{\omega_2,n} \approx \frac{1}{A_w \cdot \mu_{e/w}} \cdot \frac{1}{\alpha_{\omega_2,n}} \cdot \frac{\delta_{f_{S,B}:R_{e,B},n}^{m_{a_S:f_{S,B},n}}}{\delta_{R_{e,B}:Z,n}^{m_{\omega_2:R_{e,B},n}}} \quad (\text{Equ. SM 55})$$

and

$$10^{\left(\frac{C_{T1}}{T-C_{T2}}\right)} \delta_{K_H:Z}^{m_{G_V:K_H,n}} \delta_{G_V:K_H,n} c_{G_V,n} \approx \frac{1}{A_w \cdot \mu_{e/w}} \cdot \alpha_{G_V,n} \cdot \frac{\sigma_{e,B,n} \delta_{f_{S,B}:R_{e,B},n}^{2m_{a_S:f_{S,B},n}} \delta_{R_{e,B}:Z,n}^{m_{G_V:R_{e,B},n}}}{\delta_{L_{S,B}:R_{e,B},n}} \quad (\text{Equ. SM 56})$$

Taking the decimal logarithm of both terms of these equations, we get:

$$\begin{aligned} & \left( \frac{C_{T1}}{T-C_{T2}} \right) - m_{\omega_2:K_H,n} \log_{10}(\delta_{K_H:Z}) - \log_{10}(\delta_{\omega_2:K_H,n}) + \log_{10}(c_{\omega_2,n}) \\ & \approx -\log_{10}(A_w \cdot \mu_{e/w}) - \log_{10}(\alpha_{\omega_2,n}) + \log_{10} \left( \frac{\delta_{f_{S,B}:R_{e,B},n}^{m_{a_S:f_{S,B},n}}}{\delta_{R_{e,B}:Z,n}^{m_{\omega_2:R_{e,B},n}}} \right) \end{aligned} \quad (\text{Equ. SM 57})$$

and

$$\begin{aligned} & \left( \frac{C_{T1}}{T-C_{T2}} \right) + m_{G_V:K_H,n} \log_{10}(\delta_{K_H:Z}) + \log_{10}(\delta_{G_V:K_H,n}) + \log_{10}(c_{G_V,n}) \\ & \approx -\log_{10}(A_w \cdot \mu_{e/w}) + \log_{10}(\alpha_{G_V,n}) + \log_{10} \left( \frac{\sigma_{e,B,n} \delta_{f_{S,B}:R_{e,B},n}^{2m_{a_S:f_{S,B},n}} \delta_{R_{e,B}:Z,n}^{m_{G_V:R_{e,B},n}}}{\delta_{L_{S,B}:R_{e,B},n}} \right) \end{aligned} \quad (\text{Equ. SM 58})$$

From equations SM 57 and 58 we define the Thermo-Motility Index  $TMI_{p,n,Z}$  of the semicircular duct  $n$  as:

$$239 \quad \text{TMI}_{P,n,Z} \approx I_{B,P,n,Z} + I_{M,P,n} + I_E \approx \left( f(K_{H:Z}) + \varepsilon_{P:K_H,n,Z} \right) - \left( \frac{C_{T_1}}{T + C_{T_2}} \right) + C_{P,n,Z} \text{ (Equ. SM 59)}$$

240 where

$$241 \quad f(K_{H:Z}) = m_{\omega_2:K_H,n} \log_{10}(\delta_{K_H:Z}) \approx - \left( m_{G_V:K_H,n} \log_{10}(\delta_{K_H:Z}) \right) \text{ (Equ. SM 60)}$$

242 ,

$$243 \quad \varepsilon_{\omega_2:K_H,n,Z} = \log_{10}(\delta_{\omega_2:K_H,n}) \text{ (Equ. SM 61)}$$

244 ,

$$245 \quad \varepsilon_{G_V:K_H,n,Z} = -\log_{10}(\delta_{G_V:K_H,n}) \text{ (Equ. SM 62)}$$

246 and

$$247 \quad C_{P,n,Z} = -\log_{10}(c_{P,n}) \text{ (Equ. SM 63)}$$

248 In these formula  $I_{B,P,n,Z}$ ,  $I_{M,P,n}$  and  $I_E$  respectively stand for the bony, membranous-only and endolymph  
 249 parts of the TMI; P corresponds to either the upper corner frequency or sensitivity of the semicircular  
 250 duct n and Z corresponds to the body size variable (body mass, condylobasal length or condyle-  
 251 anteroorbital length);  $f(K_{H:Z})$  is a function that positively correlates to overall head motion  $K_H$  relative  
 252 to body size, and reflects behavioural activity;  $C_{p,n,Z}$ ,  $C_{T1}$  and  $C_{T2}$  are constants and  $\varepsilon_{P:K_H,n,Z}$  is an error  
 253 term reflecting the difference between semicircular duct function and head motion metrics.

254 As endotherms show increased body temperatures and are behaviourally more active than ectotherms,  
 255 which is likely reflected by increased overall head motion, they are clearly expected, from equation SM  
 256 59, to show higher TMI. In this context, it should be noted that the error term  $\varepsilon_{P:K_H,n,Z}$ , whose statistical  
 257 distribution should be similar between endotherms and ectotherms, is expected to differ between  
 258 species, affecting their TMI. However, the effect of the error term should be averaged out when  
 259 comparing groups, provided enough species have been sampled.

260 The endolymph part of the TMI is expressed as:

$$261 \quad I_E = \log_{10}(A_w \cdot \mu_{e/w}) \text{ (Equ. SM 64)}$$

262 where  $A_w$  corresponds the viscosity coefficient of water and equals 0.0241 mPa.s and  $\mu_{e/w}$  corresponds  
 263 to a ratio between the viscosity coefficients of endolymph and water.

264 Bony parts of the TMI are expressed as:

$$I_{B,\omega_2,n,Z} = \log_{10} \left( \frac{\delta_{R_{e,B}:Z,n}^{m_{\omega_2:R_{e,B},n}}}{\delta_{r_{S,B}:R_{e,B},n}^{m_{a_S:r_{S,B},n}}} \right) \text{ (Equ. SM 65)}$$

and

$$I_{B,G_V,n,Z} = \log_{10} \left( \frac{\delta_{L_{S,B}:R_{e,B},n}}{\sigma_{e,B,n} \delta_{r_{S,B}:R_{e,B},n}^{2m_{a_S:r_{S,B},n}} \delta_{R_{e,B}:Z,n}^{m_{G_V:R_{e,B},n}}} \right) \text{ (Equ. SM 66)}$$

where:

$\delta_{R_{e,B}:Z,n}$  (relative radius of curvature) corresponds to the ratio between the radius of curvature of the semicircular canal n and its value predicted from the body size variable.

$\delta_{r_{S,B}:R_{e,B},n}$  (relative canal thickness) corresponds to the ratio between the cross-sectional radius of the slender portion of the semicircular canal n and its value predicted from the corresponding radius of curvature.

$\delta_{L_{S,B}:R_{e,B},n}$  (relative slender length) corresponds to the ratio between the two-dimensional length of the slender portion of the semicircular canal n and its value predicted from the corresponding radius of curvature.

$\sigma_{e,B,n}$  (eccentricity factor) corresponds to a ratio, between the area of an ellipse and its squared average radius, which negatively correlates with the eccentricity  $e_{B,n}$  of the semicircular canal torus n.

Membranous-only parts of the TMI are expressed as:

$$I_{M,\omega_2,n} = \log_{10} \left( \frac{\lambda_{\mu,S,n}}{2\rho\pi\delta_{a_S:r_{S,B}+R_{e,B},n}} \right) \text{ (Equ. SM 67)}$$

and

$$I_{M,G_V,n} = I_{M,\omega_2,n} + \log_{10} \left( \frac{\pi\varepsilon_{L_{S,n}}}{\varepsilon_{\Lambda,n} \delta_{a_S:r_{S,B}+R_{e,B},n} \delta_{E:R_{e,B},n}} \right) \text{ (Equ. SM 68)}$$

where:

$\rho$  is the density of the endolymph.

$\lambda_{\mu,S,n}$  is the average wall shape drag factor of the slender portion of the semicircular duct n.

$\delta_{a_S:r_{S,B}+R_{e,B},n}$  (relative duct thickness) corresponds to the ratio between the cross-sectional area of the slender portion of the semicircular duct n and its value predicted from the the combination of the

cross-sectional radius of the slender portion of the corresponding semicircular canal and the corresponding radius of curvature.

$\delta_{E:Re,B,n}$  (relative deflection factor) corresponds to the ratio between the deflection factor of the semicircular duct n and its value predicted from the radius of curvature of the corresponding semicircular canal.

$\varepsilon_{\Lambda,n}$  (area error factor) corresponds to a ratio between the enclosed area of the torus of the semicircular duct n and the area of the ellipse best fitting the torus of the corresponding semicircular canal, both projected on their respective maximal response planes

$\varepsilon_{LS',n}$  (slender length error factor) corresponds to a ratio between the three-dimensional length of the slender portion of the semicircular duct n and the two-dimensional length of the slender portion of corresponding semicircular canal.

Exponents  $m_{\omega 2:Re,B,n}$ ,  $m_{aSrS,B,n}$  and  $m_{GV:Re,B,n}$  were computed in R, using measured morphological parameters and applying phylogenetic least square regressions on relevant datasets, following equations SM 4, 6, 9, 20, 16 and 22 (Supplementary Note 2). Their value is provided in the following table:

|                     | Anterior | Posterior | Lateral |
|---------------------|----------|-----------|---------|
| $m_{aSrS,B}$        | 1.140    | 0.876     | 0.824   |
| $m_{\omega 2:Re,B}$ | -1.083   | -1.149    | -0.992  |
| $m_{GV:Re,B}$       | 0.890    | 1.062     | 0.811   |

David, R. et al. Assessing morphology and function of the semicircular duct system: introducing new in-situ visualization and software toolbox. *Sci. Rep.* **6**, 1-14 (2016).

Jones, G. M. & Spells, K. E. A theoretical and comparative study of the functional dependence of the semicircular canal upon its physical dimensions. *Proc. R. Soc. Lond. Ser. B. Biol. Sci.* **157**, 403-419 (1963).

Rabbitt, R. D., Damiano, E. R. & Grant J. W. in *The vestibular system* (eds Highstein, S. M., Fay R. R. & Popper A. N.) 153–201 (Springer, 2004).

## Discussion on the endolymph viscosity of diapsids

The phylogenetic distribution of the endolymph part in available species indicates that a low-viscosity endolymph was the basal condition for Euarchontoglires and Euteleostei, thus parsimoniously

the basal condition for Osteichthyes too. Conversely, feral rock pigeons, which possess a high-viscosity endolymph, do not show any peculiarities in terms of locomotor behaviours, body temperature or labyrinth morphology when compared to other birds. We thus assume that a high-viscosity endolymph is typical for Aves. This raises the question as to when a high-viscosity endolymph originated in diapsids. Data from audition in various lizard species suggest that an endolymph with water-like viscosity would better fit empirical results in these species (Manley 2006, 2014). These results indicate that a high-viscosity endolymph would be unlikely for lepidosaurs, and the acquisition of a high-viscosity endolymph would have occurred between the origin of birds and the divergence of Lepidosauria and Archelosauria. In this context it should be noted that Crocodilia and Testudines are in line with the theoretical and empirical relationships between the TMI and body temperature (Fig. 2), which suggests, *a posteriori*, the retention of a low-viscosity endolymph part in these taxa.

Manley, G. A. Spontaneous otoacoustic emissions from free-standing stereovillar bundles of ten species of lizard with small papillae. *Hearing Res.* **212**, 33-47 (2006).

Manley, G. A. in *Perspectives on auditory research* (eds Popper, A. N. & Fay, R. R.) 321-341 (Springer, 2014).

#### **Supplementary Note 1. *Dimetrodon* inner ear reconstruction from a serial sectioned model**

The *Dimetrodon* specimen used in this study (FMNH PR 4976) is a wax endocast model that was reconstructed from a serially-sectioned skull. The inclusion of the specimen was paramount because, despite our efforts to scan multiple non-therapsid synapsids (Supplementary Data 3), only one retrieved usable data. The FMNH collections records do not include information on the original specimen that was sectioned to make the endocast model. However, comments in Olson (1938; also see Romer and Price, 1940) and notes from A. S. Romer preserved in the Museum of Comparative Zoology archives suggest that the endocast was reconstructed from serial sections of MCZ 9560. For measurement purposes, a photogrammetric model of FMNH PR 4976 was created based on 50 individual photographs of the specimen. The model was reconstructed using Colmap 3.5 (<https://colmap.github.io/index.html>). The endocast is comprised of about 30 slices with an average thickness of 2.147 mm, resulting in a total length of 64.42 mm. We estimate that the condylobasal length of MCZ 9560 was about 260 mm, so the

model clearly has been scaled up from the original size of the bony labyrinth. In his description of his serial sectioning technique, Olson (1944; p.9) states: "In cases of skulls under 40mm in length, it has proved very difficult to obtain evenly spaced sections since they should not be over .15mm apart. Intervals of .3 mm to .5 mm are satisfactory for skulls between 50 and 65 mm, and intervals of .75 mm for those between 65 and 100 mm. The best results have been obtained with skulls of over 100 mm by using intervals of .6 to .8mm in the otic region of the brain cases and intervals of 1.0 to 1.5mm for the more anterior parts of the skulls." He also lists slice thickness ranging from 0.37 mm to 1.1 mm (average 0.744 mm) for the specimens he describes in that work. Based on those values, we estimate that the endocast has been scaled up by a factor of between 2.68x (0.8mm slice thickness) to 3.58x (0.6 mm slice thickness), as suggested by the original publications (Olson 1938, 1944, Romer et al. 1940) and notes of A. S. Romer. Hence, measurements taken on the wax model were corrected by the average scaling factor. Using either factor instead of the average does not affect the conclusions of the study.

Olson, E. C. The occipital, otic, basicranial and pterygoid regions of the Gorgonopsia. *J. Morphol.* **62**,141–175 (1938).

Olson, E. C. Origin of mammals based upon cranial morphology of the therapsid suborders. *Geol. Soc. Am.*, **55** (1944).

Romer, A. S., Price, L. W. & Price, L. I. Review of the Pelycosauria. *Geol. Soc. Am.* **28**(1940).

**Supplementary Note 2.** Summary of the statistics.

## **Abbreviations**

Body mass: **BM**

Condylobasal length: **CBL**

Condyllo-anteroorbital length: **CAOL**

3D Bony dataset: **3DB**

3D Membranous dataset: **3DM**

2D Membranous dataset: **2DM**

Anterior canal/duct: **\_a**

Posterior canal/duct: **\_p**

Lateral canal/duct: **\_l**

Bony semicircular canals: **\_B**

378 Radius of curvature: **R**  
379 Cross-sectional area of the middle section of the cupula: **aC\_<sub>a</sub>Md**  
380 Average thickness of the crista ampullaris: **tCr**  
381 Cross-section radius of the slender portion: **rS**  
382 Length of the slender portion: **LS**  
383 Cross-sectional area of the slender portion of the membranous semicircular duct: **aS**  
384 Height of the cilia area: **hc**  
385 Average thickness of the cupula: **tC**  
386 Transverse diameter of the slender part (including the walls): **dS\_<sub>a</sub>Out**  
387 Deflection factor of the cupula: **E**  
388 Temperature ratio: **RT**  
389 Upper corner frequency:  $\omega_2$   
390 Sensitivity: **Gv**  
391 Thermo-Motility Index: **TMI**  
392 Thermic regime: **TR**  
393 Phylogenetic generalized least square regression: **PGLS-R**

394

395 **PGLS-R of height of cilia areas of cristae ampullares of semicircular ducts against corresponding**  
396 **average cristae thicknesses and cross-sectional areas of middle sections of cupulae**

|                          | Intercept | Log <sub>10</sub> (tCr_a) |                             | Pagel's $\lambda$ | adj. R <sup>2</sup> | p-value                      | AICc   | N        |
|--------------------------|-----------|---------------------------|-----------------------------|-------------------|---------------------|------------------------------|--------|----------|
| Log <sub>10</sub> (hc_a) | 1.797     | 0.387                     |                             | 0.88              | 0.71                | <b>8.93 10<sup>-13</sup></b> | -97.9  | 43 (3DM) |
|                          | Intercept | Log <sub>10</sub> (tCr_p) |                             | Pagel's $\lambda$ | adj. R <sup>2</sup> | p-value                      | AICc   | N        |
| Log <sub>10</sub> (hc_p) | 1.798     | 0.368                     |                             | 1.00              | 0.67                | <b>1.55 10<sup>-11</sup></b> | -98.2  | 43 (3DM) |
|                          | Intercept | Log <sub>10</sub> (tCr_l) | Log <sub>10</sub> (aC_l_Md) | Pagel's $\lambda$ | adj. R <sup>2</sup> | p-value                      | AICc   | N        |
| Log <sub>10</sub> (hc_l) | 1.904     | 0.369                     | 0.140                       | 0.90              | 0.66                | <b>1.39 10<sup>-10</sup></b> | -100.4 | 43 (3DM) |

397 Only specimens with measurements of height of cilia areas were included.

398

399 **PGLS-R of deflection factors of cupulae against corresponding average thicknesses of cupulae**  
400 **models and cross-sectional areas of middle sections of cupulae**

|                         | Intercept | Log <sub>10</sub> (tC_a) | Log <sub>10</sub> (aC_a_Md) | Pagel's $\lambda$ | adj. R <sup>2</sup> | p-value                          | AICc   | N        |
|-------------------------|-----------|--------------------------|-----------------------------|-------------------|---------------------|----------------------------------|--------|----------|
| Log <sub>10</sub> (E_a) | -0.431    | 0.422                    | -1.718                      | 0.98              | 0.99                | <b>&lt; 2.2 10<sup>-16</sup></b> | -154.2 | 43 (3DM) |
|                         | Intercept | Log <sub>10</sub> (tC_p) | Log <sub>10</sub> (aC_p_Md) | Pagel's $\lambda$ | adj. R <sup>2</sup> | p-value                          | AICc   | N        |
| Log <sub>10</sub> (E_p) | -0.408    | 0.479                    | -1.739                      | 0.95              | 0.99                | <b>&lt; 2.2 10<sup>-16</sup></b> | -153.3 | 43 (3DM) |
|                         | Intercept | Log <sub>10</sub> (tC_l) | Log <sub>10</sub> (aC_l_Md) | Pagel's $\lambda$ | adj. R <sup>2</sup> | p-value                          | AICc   | N        |
| Log <sub>10</sub> (E_l) | -0.417    | 0.364                    | -1.655                      | 0.82              | 1.00                | <b>&lt; 2.2 10<sup>-16</sup></b> | -184.0 | 43 (3DM) |

401 Only specimens with measurements of deflection factors were included.

402



**PGLS-R of transverse diameters with wall included against corresponding cross-sectional areas of slender portions of membranous semicircular ducts**

|                              | Intercept | Log <sub>10</sub> (aS_a) | Log <sub>10</sub> (aS_p) | Log <sub>10</sub> (aS_l) | Pagel's λ | adj. R <sup>2</sup> | p-value                       | N            |
|------------------------------|-----------|--------------------------|--------------------------|--------------------------|-----------|---------------------|-------------------------------|--------------|
| Log <sub>10</sub> (dS_a_Out) | 0.205     | 0.544                    |                          |                          | 0.39      | 0.85                | < <b>2.2 10<sup>-16</sup></b> | 47 (3DM+2DM) |
| Log <sub>10</sub> (dS_p_Out) | 0.209     |                          | 0.532                    |                          | 0.52      | 0.82                | < <b>2.2 10<sup>-16</sup></b> | 47 (3DM+2DM) |
| Log <sub>10</sub> (dS_l_Out) | 0.227     |                          |                          | 0.544                    | 0.72      | 0.85                | < <b>2.2 10<sup>-16</sup></b> | 47 (3DM+2DM) |

Only specimens with measurements of cross-sectional areas and transverse diameter (with walls) were included.

**PGLS-R of cross-section radii of slender portions against corresponding transverse diameters with wall included**

|                            | Intercept | Log <sub>10</sub> (dS_a_Out) | Pagel's λ | adj. R <sup>2</sup> | p-value                       | AICc  | N        |
|----------------------------|-----------|------------------------------|-----------|---------------------|-------------------------------|-------|----------|
| Log <sub>10</sub> (rS_a_B) | -0.023    | 1.291                        | 0.66      | 0.97                | < <b>2.2 10<sup>-16</sup></b> | -66.2 | 22 (3DM) |
|                            | Intercept | Log <sub>10</sub> (dS_p_Out) | Pagel's λ | adj. R <sup>2</sup> | p-value                       | AICc  | N        |
| Log <sub>10</sub> (rS_p_B) | 0.017     | 1.315                        | 0.00      | 0.93                | <b>1.56 10<sup>-13</sup></b>  | -50.9 | 22 (3DM) |
|                            | Intercept | Log <sub>10</sub> (dS_l_Out) | Pagel's λ | adj. R <sup>2</sup> | p-value                       | AICc  | N        |
| Log <sub>10</sub> (rS_l_B) | 0.021     | 1.286                        | 0.35      | 0.88                | <b>7.92 10<sup>-11</sup></b>  | -38.6 | 22 (3DM) |

Only specimens with measurements of cross-section radii and transverse diameter (with walls) were included.

**PGLS-R of body mass against condylobasal and condylo-anteroorbital lengths**

|                        | Intercept | Log <sub>10</sub> (CBL) | Log <sub>10</sub> (CAOL) | Pagel's λ | adj. R <sup>2</sup> | p-value                       | N         |
|------------------------|-----------|-------------------------|--------------------------|-----------|---------------------|-------------------------------|-----------|
| Log <sub>10</sub> (BM) | -2.441    | 1.181                   | 2.162                    | 0.86      | 0.89                | < <b>2.2 10<sup>-16</sup></b> | 233 (3DB) |

Only specimens with measurements of body mass were included.

**PGLS-R of cross-section radii and lengths of slender portions of bony semicircular canals against corresponding radii of curvature**

|                            | Intercept | Log <sub>10</sub> (R_a_B) | Log <sub>10</sub> (R_p_B) | Log <sub>10</sub> (R_l_B) | Pagel's λ | adj. R <sup>2</sup> | p-value                       | N         |
|----------------------------|-----------|---------------------------|---------------------------|---------------------------|-----------|---------------------|-------------------------------|-----------|
| Log <sub>10</sub> (rS_a_B) | -0.766    | 0.799                     |                           |                           | 0.74      | 0.71                | < <b>2.2 10<sup>-16</sup></b> | 298 (3DB) |
| Log <sub>10</sub> (rS_p_B) | -0.735    |                           | 0.811                     |                           | 0.68      | 0.71                | < <b>2.2 10<sup>-16</sup></b> | 298 (3DB) |
| Log <sub>10</sub> (rS_l_B) | -0.785    |                           |                           | 0.829                     | 0.56      | 0.74                | < <b>2.2 10<sup>-16</sup></b> | 298 (3DB) |
| Log <sub>10</sub> (LS_a_B) | 0.570     | 1.010                     |                           |                           | 0.67      | 0.94                | < <b>2.2 10<sup>-16</sup></b> | 298 (3DB) |
| Log <sub>10</sub> (LS_p_B) | 0.596     |                           | 0.994                     |                           | 0.58      | 0.95                | < <b>2.2 10<sup>-16</sup></b> | 298 (3DB) |
| Log <sub>10</sub> (LS_l_B) | 0.654     |                           |                           | 0.969                     | 0.67      | 0.94                | < <b>2.2 10<sup>-16</sup></b> | 298 (3DB) |

**PGLS-R of deflection factors of cupulae against corresponding radii of curvature**

|                         | Intercept | Log <sub>10</sub> (R_a_B) | Log <sub>10</sub> (R_p_B) | Log <sub>10</sub> (R_l_B) | Pagel's λ | adj. R <sup>2</sup> | p-value                 | N        |
|-------------------------|-----------|---------------------------|---------------------------|---------------------------|-----------|---------------------|-------------------------|----------|
| Log <sub>10</sub> (E_a) | 2.059     | -2.266                    |                           |                           | 0.00      | 0.87                | < 2.2 10 <sup>-16</sup> | 43 (3DM) |
| Log <sub>10</sub> (E_p) | 1.947     |                           | -2.241                    |                           | 0.48      | 0.90                | < 2.2 10 <sup>-16</sup> | 43 (3DM) |
| Log <sub>10</sub> (E_l) | 1.971     |                           |                           | -2.204                    | 0.00      | 0.90                | < 2.2 10 <sup>-16</sup> | 43 (3DM) |

Only specimens with measurements of deflection factors were included.

## PGLS-R of cross-sectional areas of slender portions of membranous semicircular ducts against corresponding radii of curvature

|                          | Intercept | Log <sub>10</sub> (rS_a_B) | Log <sub>10</sub> (R_a_B) | Pagel's λ | adj. R <sup>2</sup> | p-value                 | N        |
|--------------------------|-----------|----------------------------|---------------------------|-----------|---------------------|-------------------------|----------|
| Log <sub>10</sub> (aS_a) | -0.497    | 1.174                      | 0.164                     | 0.70      | 0.87                | < 2.2 10 <sup>-16</sup> | 47 (3DM) |
|                          | Intercept | Log <sub>10</sub> (rS_p_B) | Log <sub>10</sub> (R_p_B) | Pagel's λ | adj. R <sup>2</sup> | p-value                 | N        |
| Log <sub>10</sub> (aS_p) | -0.710    | 0.927                      | 0.420                     | 0.83      | 0.86                | < 2.2 10 <sup>-16</sup> | 47 (3DM) |
|                          | Intercept | Log <sub>10</sub> (rS_l_B) | Log <sub>10</sub> (R_l_B) | Pagel's λ | adj. R <sup>2</sup> | p-value                 | N        |
| Log <sub>10</sub> (aS_l) | -0.845    | 0.829                      | 0.372                     | 0.59      | 0.80                | < 2.2 10 <sup>-16</sup> | 47 (3DM) |

Only specimens with measurements of cross-section radii of bony canals were included.

## PGLS-R of radii of curvature against the square root of body mass and condylobasal and condylo-anteroorbital lengths

|                           | Intercept | Log <sub>10</sub> (√BM) | Log <sub>10</sub> (CBL) | Log <sub>10</sub> (CAOL) | Pagel's λ | adj. R <sup>2</sup> | p-value                 | N         |
|---------------------------|-----------|-------------------------|-------------------------|--------------------------|-----------|---------------------|-------------------------|-----------|
| Log <sub>10</sub> (R_a_B) | -0.232    | 0.483                   |                         |                          | 0.93      | 0.75                | < 2.2 10 <sup>-16</sup> | 233 (3DB) |
| Log <sub>10</sub> (R_p_B) | -0.285    | 0.485                   |                         |                          | 0.89      | 0.74                | < 2.2 10 <sup>-16</sup> | 233 (3DB) |
| Log <sub>10</sub> (R_l_B) | -0.197    | 0.475                   |                         |                          | 0.93      | 0.71                | < 2.2 10 <sup>-16</sup> | 233 (3DB) |
| Log <sub>10</sub> (R_a_B) | -0.632    |                         | 0.544                   |                          | 0.79      | 0.70                | < 2.2 10 <sup>-16</sup> | 298 (3DB) |
| Log <sub>10</sub> (R_p_B) | -0.673    |                         | 0.536                   |                          | 0.84      | 0.68                | < 2.2 10 <sup>-16</sup> | 298 (3DB) |
| Log <sub>10</sub> (R_l_B) | -0.580    |                         | 0.536                   |                          | 0.80      | 0.68                | < 2.2 10 <sup>-16</sup> | 298 (3DB) |
| Log <sub>10</sub> (R_a_B) | -0.623    |                         |                         | 0.610                    | 0.76      | 0.73                | < 2.2 10 <sup>-16</sup> | 298 (3DB) |
| Log <sub>10</sub> (R_p_B) | -0.687    |                         |                         | 0.616                    | 0.76      | 0.75                | < 2.2 10 <sup>-16</sup> | 298 (3DB) |
| Log <sub>10</sub> (R_l_B) | -0.584    |                         |                         | 0.610                    | 0.71      | 0.73                | < 2.2 10 <sup>-16</sup> | 298 (3DB) |

Only extant specimens with measurements of body mass were included in relevant regressions.

**PGLS-R of the temperature ratio against 18 models for the TMI, resulting from all possible combinations between 3 semicircular ducts, 2 functional parameters and 3 body size parameters**

|    | Intercept | TMI_ω <sub>2</sub> _a_√BM  | TMI_ω <sub>2</sub> _p_√BM  | TMI_ω <sub>2</sub> _l_√BM  | Pagel's λ | adj. R <sup>2</sup> | p-value                      | N                |
|----|-----------|----------------------------|----------------------------|----------------------------|-----------|---------------------|------------------------------|------------------|
| RT | 1.277     | -0.305                     |                            |                            | 0.00      | 0.83                | <b>8.62 10<sup>-12</sup></b> | 28 (3DB+3DM+2DM) |
| RT | 1.270     |                            | -0.309                     |                            | 0.00      | 0.79                | <b>2.05 10<sup>-10</sup></b> | 28 (3DB+3DM+2DM) |
| RT | 1.356     |                            |                            | -0.256                     | 1.00      | 0.41                | <b>1.55 10<sup>-4</sup></b>  | 28 (3DB+3DM+2DM) |
|    | Intercept | TMI_Gv_a_√BM               | TMI_Gv_p_√BM               | TMI_Gv_l_√BM               | Pagel's λ | adj. R <sup>2</sup> | p-value                      | N                |
| RT | 1.420     | -0.173                     |                            |                            | 1.00      | 0.59                | <b>1.16 10<sup>-6</sup></b>  | 28 (3DB+3DM+2DM) |
| RT | 1.443     |                            | -0.175                     |                            | 1.00      | 0.45                | <b>6.06 10<sup>-5</sup></b>  | 28 (3DB+3DM+2DM) |
| RT | 1.468     |                            |                            | -0.166                     | 1.00      | 0.30                | <b>1.59 10<sup>-3</sup></b>  | 28 (3DB+3DM+2DM) |
|    | Intercept | TMI_ω <sub>2</sub> _a_CBL  | TMI_ω <sub>2</sub> _p_CBL  | TMI_ω <sub>2</sub> _l_CBL  | Pagel's λ | adj. R <sup>2</sup> | p-value                      | N                |
| RT | 1.307     | -0.296                     |                            |                            | 0.43      | 0.74                | <b>2.90 10<sup>-9</sup></b>  | 28 (3DB+3DM+2DM) |
| RT | 1.371     |                            | -0.246                     |                            | 1.00      | 0.46                | <b>3.97 10<sup>-5</sup></b>  | 28 (3DB+3DM+2DM) |
| RT | 1.386     |                            |                            | -0.242                     | 1.00      | 0.40                | <b>1.65 10<sup>-4</sup></b>  | 28 (3DB+3DM+2DM) |
|    | Intercept | TMI_Gv_a_CBL               | TMI_Gv_p_CBL               | TMI_Gv_l_CBL               | Pagel's λ | adj. R <sup>2</sup> | p-value                      | N                |
| RT | 1.433     | -0.170                     |                            |                            | 1.00      | 0.59                | <b>1.04 10<sup>-6</sup></b>  | 28 (3DB+3DM+2DM) |
| RT | 1.467     |                            | -0.163                     |                            | 1.00      | 0.43                | <b>9.62 10<sup>-5</sup></b>  | 28 (3DB+3DM+2DM) |
| RT | 1.491     |                            |                            | -0.151                     | 1.00      | 0.28                | <b>2.37 10<sup>-3</sup></b>  | 28 (3DB+3DM+2DM) |
|    | Intercept | TMI_ω <sub>2</sub> _a_CAOL | TMI_ω <sub>2</sub> _p_CAOL | TMI_ω <sub>2</sub> _l_CAOL | Pagel's λ | adj. R <sup>2</sup> | p-value                      | N                |
| RT | 1.294     | -0.302                     |                            |                            | 0.32      | 0.72                | <b>6.36 10<sup>-9</sup></b>  | 28 (3DB+3DM+2DM) |
| RT | 1.375     |                            | -0.238                     |                            | 1.00      | 0.40                | <b>2.04 10<sup>-4</sup></b>  | 28 (3DB+3DM+2DM) |
| RT | 1.363     |                            |                            | -0.261                     | 1.00      | 0.39                | <b>2.31 10<sup>-4</sup></b>  | 28 (3DB+3DM+2DM) |
|    | Intercept | TMI_Gv_a_CAOL              | TMI_Gv_p_CAOL              | TMI_Gv_l_CAOL              | Pagel's λ | adj. R <sup>2</sup> | p-value                      | N                |
| RT | 1.437     | -0.165                     |                            |                            | 1.00      | 0.54                | <b>4.68 10<sup>-6</sup></b>  | 28 (3DB+3DM+2DM) |
| RT | 1.475     |                            | -0.152                     |                            | 1.00      | 0.37                | <b>3.86 10<sup>-4</sup></b>  | 28 (3DB+3DM+2DM) |
| RT | 1.490     |                            |                            | -0.150                     | 1.00      | 0.25                | <b>3.78 10<sup>-3</sup></b>  | 28 (3DB+3DM+2DM) |

In these regressions we used average values for the clades Acanthopterygii, Anguimorpha, Anura, Atlantogenata, Batoidea, Caudata, Crocodylia, Elopomorpha, Euarchontoglires, Galloanserae, Gekkota, Gymnophiona, Holocephali, Iguania, Lacertoidea, Laurasiatheria, Marsupialia, Monotremata, Neoaves, Otocephala, Palaeognathae, Paracanthopterygii, Protacanthopterygii, Rhynchocephalia, Scincomorpha, Selachii, Serpentes and Testudines. Only specimens with measurements of body temperature were included. These groups were chosen to best balance taxonomic sampling with robust averaging of TMI.

449 Akaike information criterion of 18 models for the TMI, and resulting weights used in model  
 450 averaging

| Model                      | AICc  | Akaike Weights |
|----------------------------|-------|----------------|
| TMI_ω <sub>2</sub> _a_√BM  | -93.4 | 0.135          |
| TMI_ω <sub>2</sub> _p_√BM  | -86.6 | 0.005          |
| TMI_ω <sub>2</sub> _l_√BM  | -84.1 | 0.001          |
| TMI_Gv_a_√BM               | -94.4 | 0.224          |
| TMI_Gv_p_√BM               | -86.1 | 0.004          |
| TMI_Gv_l_√BM               | -79.4 | 0.000          |
| TMI_ω <sub>2</sub> _a_CBL  | -94.9 | 0.288          |
| TMI_ω <sub>2</sub> _p_CBL  | -86.9 | 0.005          |
| TMI_ω <sub>2</sub> _l_CBL  | -84.0 | 0.001          |
| TMI_Gv_a_CBL               | -94.6 | 0.249          |
| TMI_Gv_p_CBL               | -85.1 | 0.002          |
| TMI_Gv_l_CBL               | -78.6 | 0.000          |
| TMI_ω <sub>2</sub> _a_CAOL | -90.5 | 0.032          |
| TMI_ω <sub>2</sub> _p_CAOL | -83.5 | 0.001          |
| TMI_ω <sub>2</sub> _l_CAOL | -83.3 | 0.001          |
| TMI_Gv_a_CAOL              | -91.4 | 0.051          |
| TMI_Gv_p_CAOL              | -82.2 | 0.001          |
| TMI_Gv_l_CAOL              | -77.6 | 0.000          |

451

452 PGLS-R of the temperature ratio against the weighted TMI, using species values or group  
 453 averages

|    | Intercept | TMI    | Pagel's λ | adj. R <sup>2</sup> | p-value                      | N                 |
|----|-----------|--------|-----------|---------------------|------------------------------|-------------------|
| RT | 1.618     | -0.018 | 0.99      | 0.01                | 0.11                         | 230 (3DB+3DM+2DM) |
| RT | 1.347     | -0.248 | 0.27      | 0.80                | <b>9.45 10<sup>-11</sup></b> | 28 (3DB+3DM+2DM)  |

454 Only specimens with measurements of body temperature were included. The first regression is based  
 455 on all relevant specimens, while the second regression is based on average values for the clades  
 456 Acanthopterygii, Anguimorpha, Anura, Atlantogenata, Batoidea, Caudata, Crocodylia, Elopomorpha,  
 457 Euarchontoglires, Galloanserae, Gekkota, Gymnophiona, Holocephali, Iguania, Lacertoidea,  
 458 Laurasiatheria, Marsupialia, Monotremata, Neoaves, Otocephala, Palaeognathae, Paracanthopterygii,  
 459 Protacanthopterygii, Rhynchocephalia, Scincomorpha, Selachii, Serpentes and Testudines.

460

461

462 Logistic regression of the thermic regime against the weighted TMI

|    | Intercept | p-value                | TMI    | p-value                | AIC    | N         |
|----|-----------|------------------------|--------|------------------------|--------|-----------|
| TR | 7.09      | 7.32 10 <sup>-13</sup> | 10.080 | 1.26 10 <sup>-12</sup> | 118.04 | 180 (3DB) |

463 Only amniote specimens with measurements of body temperature were included.

464

465

466 **Phylogenetic logistic regression of the thermic regime against the weighted TMI**

|    | Intercept | p-value | TMI   | p-value | N         |
|----|-----------|---------|-------|---------|-----------|
| TR | 4.942     | 0.083   | 6.928 | 0.041   | 180 (3DB) |

467 Only amniote specimens with measurements of body temperature were included.

468

469

### Supplementary Note 3. Divergence times and Last Occurrence Datum

#### Divergence Times

**Common ancestor of *Diadectes* and Amniota:** The relationships of diadectomorphs are controversial. They have often been recovered as the sister group of Amniota (e.g., Gauthier et al. 1988; Laurin & Reisz 1995, 1997; Lee & Spencer 1997; Kissel & Reisz 2004a; Reisz 2007; Kissel 2010; Liu & Bever 2015; Laurin & Piñeiro 2017; Ford and Benson 2019), but other analyses have recovered them nested within Amniota, either as the sister taxon of Sauropsida (Ruta et al. 2003; Ruta & Coates 2007; Marjanović & Laurin 2019) or Synapsida (Sumida et al. 1992; Berman et al. 1992; Berman 2000; Berman 2013). Here, we used the “traditional” hypothesis that diadectomorphs are the sister group of amniotes, although we acknowledge that this is an area of continuing research. Despite this stemward position, the known fossil record of diadectomorphs begins after the first appearances of Synapsida and Sauropsida. The oldest records of diadectomorphs are occurrences of *Desmatodon* in the Kasimovian (Late Pennsylvanian) Sangre de Cristo Formation of Colorado and the Red Knob Formation of Pennsylvania (Reisz 2007; Kissel 2010). The nested position of *Desmatodon* within Diadectomorpha and the stratigraphic ranges of other taxa in the clade imply that much of the earliest history of the clade is not recorded (Reisz 2007; Kissel 2010). Therefore, it is necessary to turn to other taxa to calibrate the time of origin of Amniota.

Benton et al. (2015) used the Visean (Middle Mississippian) aïstopod *Lethiscus stocki* to calibrate the divergence of crown Tetrapoda, reflecting the hypothesis that aïstopods are members of Lepospondyli and thus part of total group Amniota (e.g., Ruta et al. 2003; Ruta and Coates 2007). However, reconsideration of the phylogenetic relationships of aïstopods has raised the possibility that they are stem tetrapods, not members of the crown group (Pardo et al. 2017). If that hypothesis is correct, the stem lissamphibian *Balanerpeton* and the stem amniote *Westlothiana* from the upper Visean East Kirkton locality of Scotland (Pardo et al. 2017), which has been dated to 332.9–330.9 Mya (Benton et al. 2015), are the next relevant calibration points. Therefore, the divergence between diadectomorphs and crown amniotes must have occurred between the upper Visean and the Bashkirian given the first occurrences of synapsids and sauropsids in the Joggins Formation of Nova Scotia, which has been calibrated at 318 Mya (Benton et al. 2015; also see below). We use the midpoint of this age range (324.5 Mya) to calibrate the divergence of Diadectomorpha and Amniota.

**Synapsida + Sauropsida:** The divergence between synapsids and sauropsids occurred by the Bashkirian Stage of the Early Pennsylvanian (late Carboniferous Period). This divergence is calibrated by the presence of the sauropsid *Hylonomus lyelli* and the putative synapsids *Protoclepsydrops haplous* and *Asaphestera platyrus*, which occur in the same stratigraphic horizon in the Joggins Formation of Nova Scotia (Carroll 1964; Mann et al. 2020). *Protoclepsydrops* is known from limited, fragmentary

material, and its identity as a synapsid has been questioned (Reisz 1972, 1986; Mann & Paterson 2019). *Asaphestera* was long considered a ‘microsaur’, but had recently been re-identified as a synapsid, possibly a caseosaur (Mann et al. 2020). The sauropsid identity of *Hylonomus* is better supported (Müller and Reisz 2006), so its presence in the fossil record implies that synapsids and sauropsids must have diverged by this time, even if *Protoclepsydraps* and/or *Asaphestera* are not synapsids. Age estimates for the Joggins Formation range from about 319–310 million years ago (Reisz and Müller 2004, van Tuinen and Hadly 2004), and Benton et al. (2015) recommended of 318 million years ago as a minimum age for this divergence. We use a slightly older date of 320 Mya to accommodate the earliest divergences among sauropsids (see divergence between Captorhinidae and Diapsida below).

**Caseasauria + Eupelycosauria:** *Eocasea martinsi* and *Datheosaurus macrourus* are the oldest known relatively certain caseosaurs, and both are likely Gzhelian in age (Reisz and Fröbisch 2014; Spindler et al., 2016). However, the oldest taxa relevant for calibrating this node are the ophiacodontids *Archaeothyris florensis* and *Echinerpeton intermedium*, and the varanopid *Dendromaia unamakiensis* (assuming varnopsids are synapsids; see discussion in Ford and Benson 2019) from the slightly older Morien Group of Nova Scotia (Reisz 1972; Maddin et al. 2019; Mann & Paterson 2019), which is likely Moscovian–Kasimovian in age (see discussion in van Tuinen and Hadley 2004). The presence of ophiacodontids at this time implies the caseosaurs had also diverged by this point, regardless of the recent debate on the phylogenetic relationships of early synapsids (e.g., compare the results of Benson 2012 and Brocklehurst et al. 2016). If *Asaphestera* is indeed a caseosaur (Mann et al. 2020), it would provide direct confirmation of this hypothesis. The numerical age of the divergence should be between 309.2 Mya (the older end of the range given for the age of *Archaeothyris* in van Tuinen and Hadley 2004) and 318 Mya (Benton et al.’s 2015 hard minimum for the divergence of Synapsida). 313.6 Mya is the midpoint of this range.

**Sphenacodontidae + Therapsida:** Sphenacodontidae is the sister taxon of Therapsida and first appears in the Kasimovian Sangre de Cristo Formation in Colorado (Sumida & Berman 1993). Potentially older sphenacodontid material has been reported from Nova Scotia (Reisz 1972), but given the uncertainty in its identification we use the Sangre de Cristo record as the oldest sphenacodontid. The oldest known therapsid material is substantially younger: the early Permian *Tetraceratops insignis* and the middle Permian *Raranimus dashankouensis* (Liu et al. 2009; Amson & Laurin 2011; although see Spindler 2014, 2020). The Kasimovian ranges in age from 307.0–303.7 Mya, and we use the midpoint of this range (305.35 Mya) as the calibration point for this divergence.

**Biarmosuchia + Eutherapsida:** Biarmosuchians are generally considered to be the most stemward major therapsid clade (e.g., Sidor & Hopson 1998; Liu et al. 2009, 2010), although *Raranimus dashankouensis* and *Tetraceratops insignis* likely fall even further down the therapsid stem (Liu et al. 2009; Amson & Laurin 2011; Brink et al. 2015) (and *Tetraceratops* may not be a therapsida at all; see

Conrad and Sidor 2001; Spindler 2020). Sphenacodontidae, the sister taxon of Therapsida, first appears in the Late Pennsylvanian (Sumida and Berman, 1993), but there are no known Pennsylvanian therapsids (although see Spindler 2014). Therefore, while divergences between therapsid lineages could date back to the Pennsylvanian, there is no direct evidence for this. The putative early Permian therapsid *Tetraceratops insignis* (Amson & Laurin 2011; although see Spindler 2020) does not help to resolve this issue because it does not appear to fall within any of the major therapsid clades. The divergence between biarmosuchians and other therapsids is calibrated by the oldest record of Dinocephalia. Specifically, anteosaurid dinocephalians are present in the Golyusherma Assemblage of Russia, which is considered to be early Roadian (early middle Permian) in age (Golubev 2015), making these fossils the oldest known unequivocal therapsid occurrence. The Roadian is 272.3 to 268.8 Mya, and we calibrate this divergence at 271 Mya, in part to accommodate other divergences whose timing is based on the first appearance of dinocephalians (see below).

**Hipposaurus + Burnetiamorpha:** The biarmosuchians *Luecocephalus*, *Herpetoskylax*, and *Lemurosaurus* occur in the Wuchiapingian *Tropidostoma-Gorgonops* subzone (*Endothiodon* Assemblage Zone) and *Cistecephalus* Assemblage Zone of the Karoo Basin, South Africa (e.g., Sidor & Welman 2003; Sidor & Rubidge 2006; Day et al. 2016, 2018a; Day and Smith 2020; Smith 2020), but *Hipposaurus* is older, occurring in the Capitanian upper Abrahamskraal Formation (*Diictodon-Styracocephalus* subzone, *Tapinocephalus* Assemblage Zone) (e.g., Day et al. 2018; Day and Rubidge 2020). The divergence time of *Hipposaurus* is bracketed by the presence of the more stemward biarmosuchian *Biarmosuchus* in the likely Wordian Ocher Subassemblage of European Russia (e.g., Sennikov & Golubev 2017) and the presence of the more derived bullacephalids *Pachydictes* and *Bullacephalus* in the underlying *Eosimops-Glanosuchus* subzone of the *Tapinocephalus* Assemblage Zone (Day and Rubidge 2020). Lanci et al. (2013) provided an age range of 268.5–264.6 Mya for the lower Abrahamskraal Formation, and we use the lower end of this range (268.5 Mya) as the calibration point for this node.

**Herpetoskylax + Burnetiamorpha:** The biarmosuchian *Leucocephalus* occurs in the Wuchiapingian *Tropidostoma-Gorgonops* subzone of the *Endothiodon* Assemblage Zone of the Karoo Basin, whereas *Herpetoskylax* and *Lemurosaurus* both occur in the slightly younger *Cistecephalus* Assemblage Zone of the Karoo Basin, South Africa (e.g., Sidor & Welman 2003; Sidor & Rubidge 2006; Day et al. 2016, 2018a; Day and Smith 2020; Smith 2020), but they are members of two distinct lineages of biarmosuchians that diverged earlier in the Permian. The age of this divergence depends strongly on whether the lower *Tapinocephalus* Assemblage Zone taxa *Pachydictes* and *Bullacephalus* (i.e., the Bullacephalidae) are members of the nested clade Burnetiamorpha or if they fall near the base of the biarmosuchian phylogeny (Day et al. 2016). Phylogenetic hypotheses supporting bullacephalids as burnetiamorphs are more common in the biarmosuchian literature despite their poorer overall fit to



stratigraphy (e.g., Sidor & Smith 2007; Kruger et al. 2015; Day et al. 2016, 2018a; Kammerer 2016a), and we use this topology here. Lanci et al. (2013) provide dates ranging from 268.5–264.6 Mya for the lower Abrahamskraal Formation (i.e., the lower *Tapinocephalus* Assemblage Zone) so we use 265 Mya (approximate age of the Wordian-Capitanian boundary) for this calibration point.

**Lemurosaurus + Leucocephalus:** As noted in the previous entry, *Leucocephalus* occurs in strata assigned to the *Tropidostoma-Gorgonops* Subzone (*Endothiodon* Assemblage Zone) of the Karoo Basin, whereas *Lemurosaurus* occurs in strata assigned to the *Cistecephalus* Assemblage Zone (Sidor & Welman 2003; Day et al. 2018a; Day and Smith 2020; Smith 2020). *Lemurosaurus* is typically reconstructed as the most stemward burnetiamorph (e.g., Sidor & Welman 2003; Smith et al. 2006; Kruger et al. 2015; Day et al. 2016; Kammerer 2016a), so the minimum age of this divergence is calibrated by the oldest burnetiamorph records. In addition to *Lemurosaurus*, the oldest burnetiamorphs are *Proburnetia* and *Niuksenitia*, both of which occur in the Ilinskoe faunal assemblage of Russia (e.g., Sennikov & Golubev 2017) whose early Wuchiapingian age likely falls within the *Endothiodon* Assemblage Zone of South Africa, potentially within the *Tropidostoma-Gorgonops* Subzone (Sennikov & Golubev 2017; Schneider et al. 2019; Day and Smith 2020). The *Endothiodon* Assemblage Zone is between 260.26–256.8 Mya, with the *Tropidostoma-Gorgonops* Subzone being about 258 – 256.8 Mya (Rubidge et al. 2013; Day et al. 2015; Day and Smith 2020), and we calibrate this divergence at 260 Mya to allow time for the multiple burnetiamorph lineages to diverge before their first appearances in Russia and South Africa.

**Dinocephalia + Neotherapsida:** As with the divergence between biarmosuchians and Eutherapsida, this divergence is calibrated by the first appearance of dinocephalians in the Roadian Golyusherma Assemblage of Russia (Golubev 2015). We calibrate this divergence at 270 Mya, placing it in the Roadian, but slightly after the divergence of Biarmosuchians and eutherapsids.

**Anomodontia + Theriodontia:** The exact time of divergence between Anomodontia and Theriodontia (i.e., Gorgonopsia + Therocephalia + Cynodontia) is somewhat uncertain. In South Africa, anomodonts, therocephalians, and very fragmentary gorgonopsian remains are known from the *Eodicynodon* Assemblage zone in the Abrahamskraal Formation (e.g., Abdala et al. 2008; Day et al. 2018; Rubidge and Day 2020). Dates from near the base of this formation range from 268.5–264.6 Mya (Lanci et al. 2013). The portion of the formation corresponding to the overlying *Tapinocephalus* Assemblage Zone are in the range of 262–261 Mya (Day et al. 2015), and the underlying Ecce Group has been dated to approximately 290–265 Mya (e.g., Tohver et al. 2015; Rubidge et al. 2016; Belica et al. 2017), but the latter strata are well below any therapsid occurrences. Together, this implies that the oldest South African therapsids (including early anomodonts) are in the Wordian to early Capitanian range. The non-dicynodont anomodont *Otsheria* is known from the Ocher Assemblage of Russia, which also probably falls in the Wordian (Golubev 2015). The most stemward anomodont, *Biseridens* is known from the

Dashankou locality in China, where it co-occurs with dinocephalians but not theriodonts (Liu et al. 2010). This locality is often portrayed as older than either the *Eodicynodon* zone or the Ocher Assemblage (e.g., Liu et al. 2009, 2010) based on the primitive gestalt of *Biseridens* and the primitive therapsid *Raranimus*, but its age is poorly constrained and Rubidge and Day (2020) suggested a broad correlation between it and the *Eodicynodon* zone (also see Olroyd and Sidor 2017). Based on this information, the divergence of anomodonts and theriodonts is likely older than 262 Mya and probably older than 264–265 Mya, but younger than 272 Mya. We use 268.5 Mya as the date for this divergence (upper end of the Lanci et al. 2013 range of ages for the lower Abrahamskraal Formation).

**Patranomodon + Dicynodontia:** *Eodicynodon oosthuizeni*, the most stemward dicynodont, occurs in the eponymous *Eodicynodon* Assemblage Zone (lower Abrahamskraal Formation, Karoo Basin, South Africa), where it co-occurs with the non-dicynodont anomodont *Patranomodon nyaphulii* (e.g., Day et al. 2018; Rubidge and Day 2020). Radiometric dates and biostratigraphic correlations do not exist with sufficient precision to differentiate the first appearance of *Eodicynodon* from the divergence of Anomodontia, so we place the origin of Dicynodontia one million years after the origin of Anomodontia, 267.5 Mya.

**Common ancestor of *Eodicynodon* and *Lystrosaurus*:** As noted above, the currently-available fossil record lacks sufficient resolution to provide clear ages for divergences at the base of Dicynodontia. Therefore, we calibrate this divergence point one million years after the origin of Dicynodontia, 266.5 Mya.

**Common ancestor of *Diictodon* and *Lystrosaurus*:** *Diictodon feliceps* is a member of the dicynodont clade Pylaecephalidae. *Eosimops newtoni* and *Robertia broomiana* are the oldest members of this clade, with stratigraphic ranges extending down into the Koornplaats Member of the Abrahamskraal Formation (*Eosimops-Glanosuchus* Subzone of the *Tapinocephalus* Assemblage Zone; Day 2013; Day et al., 2018b; Day and Rubidge 2020). However, its sister lineage (including *Lystrosaurus*) has a potentially older first appearance in *Brachyprosopus broomi*. The latter species also is present in the Abrahamskraal Formation at least as far down as the Leeuvlei Member. A first appearance in the Leeuvlei member would put the first appearance of *Brachyprosopus* the lowermost *Tapinocephalus* Assemblage Zone, near the boundary with the *Eodicynodon* Assemblage Zone (Angielczyk et al. 2016; Day et al. 2020). Together, these data indicate that this divergence falls between the 261–262 Mya radiometric dates in the upper *Tapinocephalus* zone (Day et al. 2015) and the 268–264 Mya range for the dates from the base of the Abrahamskraal Formation (Lanci et al. 2013). We place this divergence at 264 Mya.

**Common ancestor of *Pristerodon* and *Lystrosaurus*:** As with the previous calibration, *Brachyprosopus broomi* is likely the oldest relevant taxon whose age is relatively well-constrained. We calibrate this node at 263 Mya, subtracting one million years from the previous calibration.

**Endothiodontia + Therochelonina:** The oldest members of these lineages, *Abajudon*, *Rastodon*, and *Emydops* co-occur with dinocephalian therapsids in the Karoo (South Africa), Ruhuhu (Tanzania), Mid-Zambezi (Zambia), and Paraná (Brazil) basins (Boos et al. 2016; Day et al. 2018; Olroyd et al. 2018; Day and Rubidge 2020). *Abajudon* and *Rastodon* are assumed to be Capitanian in age because of their co-occurrence with dinocephalians, but their ages are otherwise poorly constrained. The records of *Emydops* in the uppermost Abrahamskraal Formation (upper *Tapinocephalus* Assemblage Zone) in the Karoo Basin are close to the dates of 261.24–260.26 Mya for the upper *Diictodon-Styracocephalus* Subzone of the *Tapinocephalus* Assemblage Zone (Rubidge et al. 2013; Day et al. 2015; Day and Rubidge 2020). We calibrate this node at 262.5 Mya to reflect that the divergence must have occurred after the divergence in the previous calibration but before the ca. 261 Mya first appearance of *Emydops* in the fossil record.

**Endothiodontia:** *Abajudon kaayai*, which co-occurs with tapinocephalid dinocephalians in the Ruhuhu Formation of Tanzania and the lower Madumabisa Mudstone Formation of the Mid-Zambezi Basin of Zambia is likely the oldest known endothiodont, although radiometric dates are not available for either formation (Angielczyk et al. 2014a; Olroyd et al. 2018). However, the widespread genus *Endothiodon* is not known to co-occur definitively with dinocephalians (it is uncertain whether the *Endothiodon* specimen from the Brazilian Rio do Rasto Formation comes from the same stratigraphic level as the dinocephalians reported from that formation; Boos et al. 2013, 2015; Day and Smith 2020), nor does the recently described genus *Niassodon* (e.g., Ray 2000; Boos et al. 2013; Castanhinha et al. 2013; Cox & Angielczyk 2018; Day et al. 2018; Macungo et al. 2020) implying they are at least slightly younger. We calibrate the base of Endothiodontia at 262 Mya to reflect that divergences within the clade must have post-dated the divergence between Endothiodontia and Therochelonina (see previous entry) and must pre-date the first appearance of *Endothiodon bathystoma* in the lower Poortjie Member of the Teekloof Formation, which is between approximately 261–259 Mya (Rubidge et al. 2013; Day et al. 2015; Day and Smith 2020), and the likely similarly-aged first appearance of *E. tolani* in the Ruhuhu Formation of Tanzania (Angielczyk et al. 2014; Cox & Angielczyk 2015) and the K5 Formation of Mozambique (Macungo et al. 2020).

**Abajudon + Endothiodon:** The presumably Capitanian first appearance of *Abajudon* discussed in the previous entry is the oldest relevant calibration point for this divergence as well. We calibrate this node at 261.5 Mya to reflect the fact that it must post-date the emergence of Endothiodontia and pre-date the first appearance of *E. bathystoma* in the lower Poortjie Member of the Teekloof Formation (Day et al. 2018).

**Endothiodon tolani + Endothiodon bathystoma:** *Endothiodon tolani* was described recently from the middle fossiliferous horizon of the Ruhuhu Formation (R2 of Olroyd & Sidor 2017), Ruhuhu Basin, Tanzania (Cox & Angielczyk 2015). The age of this horizon is not well constrained, but it has been hypothesized to fall near the Guadalupian-Lopingian boundary based on biostratigraphic comparisons (Angielczyk et al. 2014a; Cox & Angielczyk 2015; Olroyd & Sidor 2017). Recently, Macungo et al. (2020) reported *E. tolani* specimens from the K5 Formation of the Metangula Graben of Mozambique, and unerupted tusks visible in CT-scans of the maxillae of NHCC LB648 allow us to recognize that specimen as the first occurrence of *E. tolani* in the Madumabisa Mudstone Formation of the Mid-Zambezi Basin, Zambia. The ages of these units are not well constrained, but there are reasons to believe that fall within the Lopingian (Castanhinha et al. 2013; Barbolini et al. 2016). *Endothiodon bathystoma* has a cosmopolitan distribution in Gondwana (e.g., Boos et al. 2013; Cox & Angielczyk 2015), but its best-dated records are in the Karoo Basin of South Africa. There, *E. bathystoma* first appears in the lower Poortjie Member of the Teekloof Formation (Day et al. 2018), which is between approximately 261–259 Mya (Rubidge et al. 2013; Day et al. 2015; Day and Smith 2020). Together, these observations suggest that *E. tolani* and *E. bathystoma* diverged no later than the latest Capitanian, and we calibrate this divergence at 261 Mya.

**Emydopoidea + Bidentalia:** The records of *Emydops* and *Rastodon* noted in the entry for Endothiodontia + Therochelonia are the oldest relevant calibration points for this node. We calibrated the divergence at 262 Mya based on the fact that it must post-date the divergence of Endothiodontia and Therochelonia, but pre-date the first appearance of *Dicynodontoides* in the Capitanian-Wuchiapingian *Lycosuchus-Eunotosaurus* subzone of the *Endothiodon* Assemblage Zone of the Karoo Basin (Angielczyk et al. 2009; Day and Smith 2020).

**Dicynodontoides + Cistecephalidae:** The first appearance of *Dicynodontoides* is in the upper Poortjie Member of the Teekloof Formation (*Lycosuchus-Eunotosaurus* subzone of the *Endothiodon* Assemblage Zone) of the Karoo Basin (Angielczyk et al. 2009; Day et al. 2018; Day and Smith 2020), which is between 260.26–259.26 Mya (Rubidge et al. 2013; Day et al. 2015; Day and Smith 2020). The oldest well-documented cistecephalid is likely *Cistecephalus microrhinus*, which first appears in the upper *Tropidostoma-Gorgonops* Subzone of the *Endothiodon* Assemblage Zone of the Karoo Basin (Smith & Keyser 1995; Day and Smith 2020). This assemblage zone is bracketed by radiometric dates of 259.26 Mya and 256.25 Mya (Day et al. 2015). The undescribed Mid-Zambezi Basin cistecephalid (see Angielczyk et al. 2019) may be older, but its age is very poorly constrained. We calibrate this node at 259 Mya based on the age of the *Lycosuchus-Eunotosaurus* Subzone.

**Kawingasaurus + Kembawacela:** Our dataset includes two cistecephalid species, *Kawingasaurus fossilis* from the Usili Formation (Ruhuhu Basin, Tanzania; Cox 1972) and *Kembawacela kitchingi* from the upper Madumabisa Mudstone Formation (Luangwa Basin, Zambia; Angielczyk et al. 2019).

Angielczyk et al. (2014b) correlated the Usili and upper Madumabisa Mudstone formations with the Wuchiapingian *Cistecephalus* Assemblage Zone of the Karoo Basin, but more recent work suggests that they may encompass parts of the upper *Cistecephalus* Assemblage Zone and the lower *Daptocephalus* Assemblage Zone (Angielczyk & Kammerer 2017; Angielczyk 2019; Smith 2020; Viglietti 2020; also see Sidor et al. 2010; Kammerer 2019). Therefore, the divergence between *Kawingasaurus* and *Kembawacela* must have occurred sometime between the divergence of Cistecephalidae (presumably near the Capitanian-Wuchiapingian boundary; see previous entry) and Wuchiapingian-Changhsingian boundary (i.e., near the *Cistecephalus*-*Daptocephalus* Assemblage one boundary; see dates in Rubidge et al. 2013; Day et al. 2015). We calibrate this node at 256 Mya, based on Rubidge et al.'s (2013) date of 256.25 Mya near the base of the Oudeberg Member of the Balfour Formation, which corresponds in part to the *Cistecephalus* Assemblage Zone.

**Common ancestor of *Oudenodon* and *Lystrosaurus*:** The common ancestor of *Oudenodon* and *Lystrosaurus* must have existed after the divergence of the stemward, presumably Capitanian bidentalian *Rastodon* and early cryptodonts and geikiids such as *Tropidostoma*, *Australobarbarus*, and *Bulbasaurus*, all of which are early Wuchiapingian in age (approximately the *Endothiodon* Assemblage Zone of the Karoo Basin or its likely equivalents; e.g., Kurkin, 2011; Benton et al., 2012; Kammerer & Smith 2017; Sennikov & Golubev, 2017; Kammerer & Masyutin, 2018a; Day et al. 2018; Day and Smith 2020). Radiometric dates of 259.26 Mya and 256.25 Mya bracket the *Endothiodon* Assemblage Zone in the Karoo Basin (Rubidge et al. 2013; Day et al. 2015), and we calibrate this node at 258 Mya, reflecting the presence of *Tropidostoma* and *Bulbasaurus* in the *Tropidostoma*-*Gorgonops* Subzone of the *Endothiodon* Assemblage Zone (Day et al. 2018).

**Common ancestor of *Aulacephalodon* and *Lystrosaurus*:** The early Wuchiapingian (*Tropidostoma*-*Gorgonops* Subzone of the *Endothiodon* Assemblage Zone) geikiid *Bulbasaurus* is the oldest taxon that is relevant to this calibration (Kammerer & Smith 2017). We calibrate this node at 257.5 Mya to reflect the fact that *Bulbasaurus* is present in the *Tropidostoma*-*Gorgonops* Subzone (Day et al. 2018; Day and Smith 2020) but must have diverged after the common ancestor of *Oudenodon* and *Lystrosaurus* (see previous entry).

**Common ancestor of *Lystrosaurus* and *Sangusaurus*:** The fossils that are most relevant for calibrating this divergence depend strongly on which taxa are most closely related to *Lystrosaurus* and where Lystrosauridae falls relative to other dicynodontoids in dicynodont phylogeny (*Sangusaurus* dates from the Anisian–Carnian interval and is well nested within Triassic kannemeyeriiform dicynodonts; Angielczyk et al. 2018; Peacock et al. 2018a). Unfortunately, these are both areas where recent phylogenetic analyses of the group have differed (e.g., compare Angielczyk & Kammerer 2017; Kammerer 2018, 2019; Olroyd et al. 2018; Kammerer et al. 2019; Olivier et al. 2019; Liu 2020). For this analysis, we assumed that the topology of Kammerer (2019) is correct, but our results would not

vary dramatically if other recent phylogenies were used as a reference instead. In this context, *Dicynodon lacerticeps*, *Dicynodon angielczyki*, *Daptocephalus huenei*, *Dinanomodon gilli*, and *Peramodon amalitzkii* all are known from faunal assemblages that are thought to span the Changhsingian-Wuchiapingian boundary (i.e., the *Cistecephalus* and *Daptocephalus* Assemblage zones of South Africa, the Usili Formation of Tanzania, the upper Madumabisa Mudstone Formation of Zambia, and the Sokolki Subassemblage of Russia; see e.g. Viglietti et al. 2016; Sennikov & Golubev 2017; Angielczyk & Kammerer 2017; Angielczyk 2019; Smith 2020; Viglietti 2020; dates from Rubidge et al. 2013). Permian occurrences of *Lystrosaurus* in China and South Africa seem to be restricted to the Changhsingian (i.e., the Guodikeng Formation and the *Lystrosaurus maccaigi*-*Moschorhinus* Subzone of the *Daptocephalus* Assemblage Zone; dates from Yang et al. 2010; Rubidge et al. 2013; Gastaldo et al. 2015; also see Liu 2018; Viglietti 2020) and thus are slightly younger. Based on the radiometric dates for the Karoo Basin in Rubidge et al. (2013) and Gastaldo et al. (2015), the age of this node likely falls in the 256–253 Mya range and we calibrate it at 255 Mya.

**Lystrosaurus declivis + Lystrosaurus murrayi:** *Lystrosaurus declivis* and *L. murrayi* are best known from the Karoo Basin of South Africa, where they occur in strata assigned to the earliest Triassic *Lystrosaurus declivis* Assemblage Zone (e.g., Botha & Smith 2006, 2007; Smith & Botha-Brink 2014; Botha and Smith 2020; although see Gastaldo et al. 2020 for an alternative age assessment). Phylogenetic relationships within the genus *Lystrosaurus* have been unstable in recent phylogenetic analyses (e.g., compare Angielczyk & Kammerer 2017; Kammerer 2018, 2019; Olroyd et al. 2018; Kammerer et al. 2019; Olivier et al. 2019; Liu et al. 2020). In some cases, they are reconstructed as sister taxa, meaning their divergence could be as young as earliest Triassic, whereas in other cases species with first occurrences in the late Permian fall between them, implying a late Permian divergence. Here, we place this divergence in the late Permian (equivalent to *Lystrosaurus maccaigi*-*Moschorhinus* subzone of the *Daptocephalus* Assemblage Zone) and calibrate it at 253 Mya based on the radiometric date of Gastaldo et al. (2015).

**Gorgonopsia + Eutheriodontia:** The oldest well-characterized gorgonopsian is *Eriphostoma microdon*, which first appears in the Capitanian *Diictodon*-*Styracocephalus* Subzone of the *Tapinocephalus* Assemblage Zone of the Karoo Basin, South Africa (Kammerer 2014; Kammerer et al. 2015; Day et al. 2018; Day and Rubidge 2020), although fragmentary material has also been reported from the Wordian *Eodicynodon* Assemblage Zone (Abdala & Rubidge 2008; Rubidge and Day 2020). More reliable Wordian to Wordian-Capitanian records exist for Eutheriodontia, in the form of therocephalians in Russia and South Africa (e.g., Abdala & Rubidge 2008; Huttenlocker & Smith 2017), with *Glanosuchus macrops* and *Ictidosaurus angusticeps* from the lower Abrahamskraal Formation (*Eodicynodon* Assemblage Zone) comprising the oldest occurrences of the clade (Huttenlocker & Smith 2017; Day et al. 2018; Rubidge and Day 2020). Dates from near the base of the Abrahamskraal

Formation range from 268.5–264.6 Mya (Lanci et al. 2013). We calibrate this node at 265.5 Mya, one million years after our calibration for the divergence of Theriodontia from Anomodontia.

**'Aloposaurus' + Scylacocephalus + Lycaenops + Dixeya + BP/1/155:** Our dataset includes five African gorgonopsians, but only one (*Lycaenops*; Wuchiapingian–Changhsingian) has been formally included in recent phylogenetic analyses of the clade. An important result of this work is the new hypothesis that African gorgonopsians form a single clade that is distinct from Russian members of the group (Kammerer & Masyutin 2018a; Bendel et al. 2018). *Eriphostoma microdon* is the oldest and most stemward well-characterized African gorgonopsian, occurring in the upper Abrahamskraal and lower Teekloof formations in the Karoo Basin (*Tapinocephalus*–*Endothiodon* assemblage zones; Kammerer 2014; Kammerer et al. 2015; Kammerer & Masyutin 2018a; Bendel et al. 2018; Day and Rubidge 2020; Day and Smith 2020). As such it provides a useful estimate of the maximum time of divergence for the African specimens in our dataset. The upper *Tapinocephalus* Assemblage Zone has been dated to the late Capitanian (ca. 261 Mya; Rubidge et al. 2013; Day et al. 2015; Day and Rubidge 2020), and the first appearance of *Eriphostoma* is likely slightly older than the dated strata. We calibrate this node at 262 Mya to reflect its position between the divergence of Gorgonopsia and Eutheriodontia (see previous entry) and the 261.24 Mya date for the upper *Tapinocephalus* Zone (Rubidge et al. 2013).

**Terocephalia + Cynodontia:** The oldest cynodont species are *Charassognathus gracilis* and *Abdalodon diastematicus*, both of which are known from the Hoedemaker Member of the Teekloof Formation in the Karoo Basin (lower Wuchiapingian *Tropidostoma*–*Gorgonops* Subzone of the *Endothiodon* Assemblage Zone; Botha et al. 2007; Kammerer 2016b; age from Rubidge et al. 2013; Day et al. 2015; Day and Smith 2020). Terocephalia has a deeper fossil record, with *Glanosuchus macrops* and *Ictidosaurus angusticeps* from the lower Abrahamskraal Formation (*Eodicynodon* Assemblage Zone) comprising the oldest occurrences of the clade (Huttenlocker & Smith 2017; Day et al. 2018; Rubidge and Day 2020). Lanci et al. (2013) dated the lower Abrahamskraal Formation to 268.5–264.6 Mya, and we calibrate this node at 265 Mya to reflect these ages and also the fact that this divergence must post-date the divergence of Gorgonopsia from Eutheriodontia (see above). Our calibration is notably younger than statistical estimates of the root age for Cynodontia presented by Lukic-Walther et al. (2019), which clustered near the Cisuralian–Guadalupian boundary. However, our calibration is consistent with the known therapsid fossil record.

**Akidnognathidae + Baurioidea:** The therocephalians in our dataset comprise members of two major clades, Akidnognathidae (*Euchambersia*, *Olivierosuchus*) and Baurioidea (*Ictidosuchoides*, *Mupashi*, *Choerosaurus*, *Microgomphodon*) (e.g., Huttenlocker & Smith 2017; Liu & Abdala 2017; Kammerer and Masyutin 2018b). Of these two clades, baurioids appear earlier in the fossil record, near the Capitanian–Wuchiapingian boundary (e.g., cf. *Ictidosuchoides* in the South African *Lycosuchus*–*Eunotosaurus* Subzone of the *Endothiodon* Assemblage Zone, *Karenites* in the Russian Kotelnich

Subassemblage; Huttenlocker and Smith 2017; Day and Smith 2020). The base of the *Lycosuchus-Eunotosaurus* Subzone is constrained by a radiometric date of 260.26 Mya at the base of the Poortjie Member of the Teekloof Formation (Day and Smith 2020), and we calibrate this node at 260.26 Mya.

**Olivierosuchus + Euchambersia:** Although it is relatively well-nested within Akidnognathidae, *Euchambersia mirabilis* is one of the first members of the clade to appear in the fossil record (Wuchiapingian *Cistecephalus* Assemblage Zone, Karoo Basin; Benoit et al. 2017a; Huttenlocker & Smith 2017; age from Rubidge et al. 2013). Radiometric dates and revisions to Karoo litho- and biostratigraphy suggest that the base of the *Cistecephalus* Assemblage zone is older than 256 Mya and that the boundary between the *Cistecephalus* and *Daptocephalus* assemblage zones is slightly older than 255 Mya (Rubidge et al. 2013; Viglietti et al. 2016, 2017, 2018a; Smith 2020; Viglietti 2020). Therefore, we calibrate this node at 257 Mya.

**Common ancestor of Ictidosuchoides and Microgomphodon:** *Ictidosuchoides longiceps* is one of the oldest baurioids, with well characterized records extending back to the Wuchiapingian *Tropidostoma-Gorgonops* Subzone of the *Endothiodon* Assemblage Zone of South Africa and a potential occurrence in the Capitanian-Wuchiapingian *Lycosuchus-Eunotosaurus* Subzone of the *Endothiodon* Assemblage Zone (Huttenlocker & Smith 2017; Day et al. 2018; Day and Smith 2020). *Karenites ornamentatus* from the Kotelnich Subassemblage in Russia is likely of similar age (Huttenlocker & Smith 2017; Sennikov & Golubev 2017; Kammerer & Masyutin 2018b). The *Lycosuchus-Eunotosaurus* Subzone is bracketed by radiometric dates of 260.26 Mya and 259.25 Mya (Rubidge et al. 2013; Day et al. 2015; Day and Smith 2020), and we calibrate this node at 259.5 Mya.

**Common ancestor of Mupashi and Microgomphodon:** *Mupashi migrator*, from the upper Madumabisa Mudstone Formation of Zambia, is commonly reconstructed as the sister taxon of *Karenites ornamentatus* from Russia (Huttenlocker & Sidor 2016; Huttenlocker & Smith 2017; Liu & Abdala 2017; Kammerer & Masyutin 2018b). *Karenites* occurs in the Kotelnich Subassemblage, which is generally considered to be close to the Capitanian-Wuchiapingian boundary in age (e.g., Kurkin 2011; Benton et al. 2012; Kammerer & Masyutin 2018; Sennikov & Golubev 2018), although radiometric dates do not yet exist for the assemblage. We calibrate the age of this node as 259 Mya, making it slightly younger than the age of the common ancestor of *Ictidosuchoides* and *Microgomphodon*.

**Common ancestor of Choerosaurus and Microgomphodon:** *Choerosaurus dejageri* occurs in the Wuchiapingian *Tropidostoma-Gorgonops* Subzone of the *Endothiodon* Assemblage Zone of the Karoo Basin (Benoit et al. 2016a; Huttenlocker & Smith 2017; Smith and Day 2020), making it one of the oldest baurioids. By contrast *Microgomphodon oligocynus* dates to the Middle-?Late Triassic *Langbergia-Garjainia* Subzone of the *Cynognathus* Assemblage Zone (Abdala et al. 2014; Huttenlocker & Smith 2017; Hancox et al. 2020). The *Tropidostoma-Gorgonops* Subzone is thought to



be between 258 Mya and 256.8 Mya in age (Rubidge et al. 2013; Day et al. 2015; Day and Smith 2020). We calibrate this node at 258 Mya, one million years after the age of the common ancestor of *Mupashi* and *Microgomphodon*.

**Common ancestor of *Procynosuchus* and mammals:** There is uncertainty about the exact phylogenetic placement of *Procynosuchus* (e.g., compare Botha et al. 2007; Kammerer 2016b; Van den Brandt & Abdala 2018; Abdala et al. 2019; Huttenlocker and Sidor 2020; supertree results of Lukic-Walther et al. 2019), which impacts on which taxa are most useful for calibrating this node. If *Procynosuchus* (or a clade comprised of *Procynosuchus* and *Dvinia*) is the most stemward known cynodont lineage, then the presence of *Charassognathus* and *Abdalodon* in the early Wuchiapingian *Tropidostoma-Gorgonops* Subzone of the *Endothiodon* Assemblage Zone of South Africa (Day and Smith 2020) implies that *Procynosuchus* must have diverged by that time. Alternatively, if *Procynosuchus* is in a more nested position than *Charassognathus* and/or *Abdalodon* (or *Charassognathidae sensu* Huttenlocker and Sidor 2020), then its divergence time might be closer to its actual first appearance near the boundary of the *Cistecephalus* and *Daptocephalus* assemblage zones (e.g., Huttenlocker et al. 2011; Kammerer 2016b, Viglietti et al. 2016; Smith 2020; Viglietti 2020). For the purposes of this analysis, we assumed that *Procynosuchus* falls stemward of *Charassognathus* and *Abdalodon*, and we calibrate this node at 259 Mya (i.e., near the boundary between the boundary between the *Lycosuchus-Eunotosaurus* and *Tropidostoma-Gorgonops* subzones of the *Endothiodon* Assemblage Zone in the Karoo Basin; dates from Rubidge et al. 2013; Day et al. 2015; Day and Smith 2020).

**Epicynodontia:** *Cynosaurus suppostus* occurs in the upper Wuchiapingian-Changhsingian *Cistecephalus* and *Daptocephalus* assemblage zones of South Africa (Van den Brandt & Abdala 2018; Smith 2020; Viglietti 2020) and provides a calibration point for this node. The base of the *Cistecephalus* Assemblage zone dates to 256.6 Mya (Rubidge et al. 2013; Viglietti et al. 2016, 2017, 2018a; Smith 2020), so we calibrate this node at 258 Mya, in part to accommodate additional divergences that must have occurred in the latest Permian (see next two entries)

**Common ancestor of *Galesaurus* and mammals:** *Galesaurus planiceps* is a well characterized cynodont known from the Early Triassic *Lystrosaurus declivis* Assemblage Zone of South Africa (e.g., Jasinowski & Abdala 2017a, 2017b; Butler et al. 2018; Pusch et al. 2019; Botha and Smith 2020). However, the presence of the phylogenetically more deeply-nested cynodonts *Nanictosaurus* and *Vetusodon* in the Changhsingian *Daptocephalus* Assemblage Zone of the Karoo Basin (e.g., Abdala et al. 2019; Viglietti 2020) implies that the lineage including *Galesaurus* must have diverged in the Permian as well. The base of the *Daptocephalus* Assemblage Zone is approximately 255 Mya (Rubidge et al.; Viglietti 2020), and we use 257 Mya as a calibration point for this node to accommodate additional divergences that must have occurred in the latest Permian (see next entry).

**Common ancestor of *Thrinaxodon* and mammals:** *Thrinaxodon liorhinus* is unquestionably the most thoroughly studied non-mammalian cynodont, and it has a well-documented stratigraphic range in the Early Triassic Palingkloof Member of the Balfour Formation and the Katberg Formation in the Karoo Basin (e.g., Botha & Smith 2006; 2020) as well as the lower Fremouw Formation in Antarctica (e.g., Kitching et al. 1972; Colbert and Kitching 1977; Hammer 1990; Peacock et al. 2018b). As in the case of *Galesaurus* (see previous entry), the occurrence of the phylogenetically more-nested cynodonts *Nanictosaurus* and *Vetusodon* in the *Daptocephalus* Assemblage Zone (e.g., Abdala et al. 2019; Viglietti 2020) implies that the lineage including *Thrinaxodon* must have diverged in the Permian as well. We calibrate this node at 256 Mya, reflecting the fact that the base of the *Daptocephalus* Assemblage Zone is slightly younger than this age (Rubidge et al. 2013; Viglietti et al. 2016, 2017, 2018a; Viglietti 2020).

**Eucynodontia:** A consistent feature of analyses of cynodont phylogeny is the division of “higher” cynodonts into two major clades, the extinct Cynognathia and Probainognathia, whose extant representatives are mammals (e.g., see supertree in Lukic-Walther et al. 2019), which are united within Eucynodontia. The strata hosting the oldest occurrences of eucynodonts, such as the lower Burgersdorp Formation of the Karoo Basin (*Laingbergia-Garjainia* Subzone of the *Cynognathus* Assemblage Zone), have typically been thought to be Olenekian in age (e.g., Rubidge 2005; Lucas 2010; Schneider et al. 2019; Hancox et al. 2020 although see further discussion in the following entry). However, depending on the identity of its sister taxon, the eucynodont lineage must have diverged by the Early Triassic (e.g., if *Playtocraniellus* is the sister taxon; Abdala 2007) or the latest Permian (e.g., if *Vetusodon* is the sister taxon; Abdala et al. 2019). For this analysis, we assumed the latter hypothesis is correct, and used Gastaldo et al.’s (2015) radiometric date of 253.48 Mya for the *Lystrosaurus maccaigi-Moschorhinus* subzone of the *Daptocephalus* Assemblage Zone to calibrate this node.

**Common ancestor of Trirachodontidae and *Massetognathus*:** The most stemward cynognathian lineage in our dataset is Trirachodontidae. In addition to *Trirachodon* itself, Trirachodontidae also includes the genera *Langbergia* and *Cricodon* (Sidor & Hopson 2018), and possibly *Beishanodon* and *Sinognathus* from China (Liu & Abdala 2014). We treat Trirachodontidae as a clade in our phylogeny, but recently Hendrickx et al. (2020) proposed that the trirachodontids may instead be a paraphyletic assemblage on the stem leading to Traversodontidae. *Langbergia*, from the lower Burgersdorp Formation (*Langbergia-Garjainia* Subzone of the *Cynognathus* Assemblage Zone; Hancox et al. 2020) of the Karoo Basin is the stratigraphically lowest-occurring trirachodontid. Traditionally, one record of *Trirachodon berryi* was suggested to have originated in this subzone (Abdala et al. 2006), but Hancox et al.’s (2020) redefined *Cynognathus* zone biostratigraphy would place this specimen in the overlying *Trirachodon-Kannemeyeria* Subzone. *Langbergia* also occurs stratigraphically below other stemward cynognathians such as *Cynognathus* and *Diademodon* (Neveling 2004), making it the most relevant record for calibrating this divergence. As noted in the previous entry, the *Laingbergia-Garjainia*

Subzone has generally been regarded as Olenekian in age, although it has not been radiometrically dated directly. Recent radiometric dates of strata that are biostratigraphically-correlated with the *Cynognathus* Assemblage Zone have raised the possibility that it parts of it might be substantially younger than previously thought (e.g., Ottone et al. 2014; Marsicano et al. 2016; also see discussion in Martinelli et al. 2017a; Peacock et al. 2018a; Schneider et al. 2019). Detrital zircon crystals from the lower part of the underlying Katberg Formation with a minimum age of  $250 \pm 5$  Mya (Viglietti et al. 2018b) also are consistent with a younger age for the *Cynognathus* Assemblage Zone. However, the wide error range on the latter date and the existence of dates for other biostratigraphically-correlated strata more in accordance with the traditional hypothesis (Liu et al. 2018) suggest that further work on the problem is needed. For the purposes of this paper, we have maintained the assumption that subzone A of the *Cynognathus* Assemblage Zone is Olenekian (Hancox et al. 2020). We calibrate this node at 248 Mya, in the late Olenekian, to accommodate the possibility of an Olenekian age for at least part of the underlying Katberg Formation. This is slightly younger than the statistically estimated root age of 249.34 Mya for Cynognathia presented by Lukic-Walther et al. (2019).

**Common ancestor of *Trirachodon* and *Cricodon*:** *Trirachodon berryi* is an index fossil for the *Trirachodon-Kannemeyeria* Subzone of the of the *Cynognathus* Assemblage Zone of the South Africa Karoo Basin (Hancox et al. 2020). The two species of *Cricodon* recognized by Hopson and Sidor (2018) include occurrences in the *Trirachodon-Kannemeyeria* subzone of the *Cynognathus* Assemblage Zone (*C. kannemeyeri*) as well as the overlying *Cricodon-Ufudocyclops* Subzone, the Ntawere Formation of Zambia, and the Lifua Member of the Manda Beds of Tanzania (all *C. metabolus*; Hopson & Sidor 2018; Peacock et al. 2018a; Hancox et al. 2020). As noted in the previous entry, the age of the *Cynognathus* Assemblage Zone and many biostratigraphically-correlated assemblages has been the subject of recent debate. We calibrate this divergence at 247.5 Mya (latest Olenekian), slightly older than the traditionally-assumed early Anisian age for the *Trirachodon-Kannemeyeria* Subzone (e.g., Hancox et al. 2020, although see discussion above).

**Common ancestor of *Scalenodon* and *Massetognathus*:** Traditionally, the Lifua Member of the Manda Beds, which hosts the cynodont *Scalenodon angustifrons* (e.g., Liu & Abdala 2014), has been considered to be Anisian–early Ladinian in age (e.g., Lucas 1998, 2010; Rubidge 2005), although no radiometric dates are available for the Lifua Member or nearby biostratigraphically-correlated strata in southern Africa (e.g., Ntawere Formation of Zambia, Burgersdorp Formation of South Africa). Recently published radiometric dates from South American strata (Philipp et al. 2013, 2018; Ottone et al. 2014; Marsicano et al. 2016; Langer et al. 2018) and the increasing number of cynodonts (including *Scalenodon* itself) and other taxa shared between basins in South America and southern Africa (e.g., Abdala et al. 2013; Martinelli et al. 2017a; Melo et al. 2017; Peacock et al. 2018a) have raised the strong possibility that *Scalenodon* is no older than late Ladinian and could be early Carnian in age. A Ladinian–

early Carnian age for *Massetognathus* is relatively certain (e.g., Marsicano et al. 2016; Schmitt et al. 2019). We calibrate this node at 239 Mya, reflecting the fact that the *Dinodontosaurus* Assemblage Zone of Brazil (Santa Maria Supersequence) is likely older than 236–237 Mya and may fall within the late Ladinian (e.g., Martinelli et al. 2017a; Melo et al. 2017; Philipp et al. 2018; Schmitt et al. 2019), as well as the need to accommodate the divergence between *Massetognathus* and *Luangwa*, both of which also are present in the *Dinodontosaurus* Assemblage Zone of Brazil (see next entry).

**Common ancestor of *Luangwa* and *Massetognathus*:** As its name suggests, *Luangwa* was first discovered in the upper portion of the Triassic Ntawere Formation of the Luangwa Basin, Zambia (Brink 1963), but it was subsequently found in Brazil, Namibia, and Tanzania (Abdala & Sa-Teixeira 2004; Abdala & Smith 2009; Martinelli et al. 2017a; Peacock et al. 2018a). The upper Ntawere Formation was traditionally considered to be Anisian in age (Rubidge 2005), but the presence of *Luangwa* in Brazilian strata radiometrically dated to near the Ladinian–Carnian boundary strongly suggest that the Ntawere Formation is younger than previously appreciated (Peacock et al. 2018a; also see previous entry). We calibrate this divergence at 238 Mya, reflecting the fact that the *Dinodontosaurus* Assemblage zone of Brazil (Santa Maria Supersequence) is likely older than 236–237 Mya (e.g., Martinelli et al. 2017a; Melo et al. 2017; Philipp et al. 2018; Schmitt et al. 2019).

**Common ancestor of *Lumkuia* and mammals:** There has been uncertainty over the last two decades as to the identity of the most stemward member of Probainognathia, the cynodont clade that includes mammals as its extant representatives (e.g., compare Hopson & Kitching 2001; Liu & Olsen 2010; Martínez et al. 2013a; Ruta et al. 2013; Martinelli et al. 2017a, 2017b, 2017c; Stefanello et al. 2018; Lukic-Walther et al. 2019; Wallace et al. 2019). Here, we follow the hypothesis that *Lumkuia fuzzi* is the most stemward probainognathian, which appears to be an emerging consensus among recent analyses (also see Benoit et al. 2019). The only known specimen of *Lumkuia* was collected from the *Trirachodon-Kannemeyeria* Subzone of the *Cynognathus* Assemblage Zone (Burgersdorp Formation, Karoo Basin) (Hopson and Kitching 2001; Hancox et al. 2020). As noted in several entries above, the *Cynognathus* Assemblage zone was traditionally regarded as Anisian (Middle Triassic) in age based on biostratigraphical correlations, but new radiometric dates from South America have raised the possibility of an age as young as Ladinian–Carnian (Middle–Late Triassic). Therefore, the divergence between *Lumkuia* and the lineage including other probainognathians could be as early as Olenekian (based on the presence of cynognathians in the record at this time and assuming a “traditional” age for the *Cynognathus* zone; see entry for the common ancestor of *Trirachodontidae* and *Massetognathus* above), or as late as Ladinian (assuming an age no older than Ladinian for most of the “classic” African and South American cynodont-bearing basins) (e.g., see discussion in Martinelli et al. 2017a). We calibrate this node at 244 Mya (i.e., the midpoint of the Olenekian–Ladinian age range). The difference between this calibration and that for the divergence between *Trirachodon* and *Massetognathus* implies

the existence of a probainognathian ghost lineage following the divergence of Cynognathia and Probainognathia. Our calibration is also notably younger than the statistically estimated root age of 251.9 Mya for Probainognathia presented by Lukic-Walther et al. (2019).

**Common ancestor of *Chiniquodon* and mammals:** Following the taxonomic revision of Abdala & Giannini (2002), *Chiniquodon* is one of the stratigraphically and geographically widest-ranging early probainognathians (see review in Abdala & Gaetano 2018; Martinelli et al. 2017a). The oldest records of the genus are from the *Dinodontosaurus* Assemblage Zone (Santa Maria Supersequence) of Brazil and the Chañares Formation of Argentina (e.g., Abdala & Giannini 2002; Abdala & Gaetano 2018; Schmitt et al. 2019), which are late Ladian–early Carnian in age (Marsicano et al. 2016; Philipp et al. 2018). We calibrate this node at 238 Mya, reflecting the stratigraphic position of the *Dinodontosaurus* Assemblage Zone (Pinherios-Chiniquá sequence) below Philipp et al.’s (2018) radiometric date of 237 Mya for the base of the overlying *Santacruzodon* Assemblage Zone (Santa Cruz sequence).

**Common ancestor of *Riograndia* and mammals:** The ictidosaur (sensu Martinelli and Rougier 2007) *Riograndia guaibensis* is known from the *Riograndia* Assemblage Zone (Candelária Sequence, Santa Maria Supersequence) of the Paraná Basin, Brazil (e.g., Soares et al. 2011). Rocks from this assemblage zone were recently dated at 225.42 Mya (Norian) by Langer et al. (2018). This is almost certainly an underestimate of the age of this divergence, and a more likely estimate of the age is calibrated by the presence of the more stemward prozostrodonts *Prozostrodon*, *Therioherpeton*, and *Alemoatherium* in the underlying *Hyperodapedon* Assemblage Zone (e.g., Martinelli et al. 2016, 2017b; Pacheco et al. 2017), which is thought to be as old as 231.4 Mya (Carnian) based on biostratigraphical correlation with the radiometrically-dated Ischigualasto Formation of Argentina (Martínez et al. 2013b). We calibrate this divergence at 234 Mya, in part to accommodate the presumably Carnian divergence of tritylodontids, brasilodontids, and mammaliaforms (see next entry).

**Common ancestor of Tritylodontidae + *Pseudotherium* and mammals:**

Tritylodontids are known primarily from the Jurassic and Cretaceous (e.g., Abdala & Gaetano 2018), but *Oligokyphus* has been reported from the Late Triassic (Rhaetian) of Nova Scotia and Germany (Fedak et al. 2015). However, there are older Triassic fossils that are relevant to calibrating this divergence, but the question of which specific taxa are most important depends strongly on the phylogenetic relationships assumed for tritylodontids. Two main phylogenetic positions have been proposed for tritylodontids. One posits that they are derived cynognathians (e.g., Hopson & Kitching 2001; Sues & Jenkins 2006; Bonaparte & Crompton 2017; Sidor & Hopson 2018), whereas the other places them within Probainognathia, close to the base of Mammaliaformes (e.g., Abdala 2007; Liu & Olsen 2010; Ruta et al. 2013; Martinelli et al. 2016; Lukic-Walther et al. 2019; Wallace et al. 2019). Among phylogenies that place tritylodontids within Probainognathia, there also is debate concerning

the branching order of tritylodontids, trithelodontids, and brasilodontids relative to Mammaliaformes (e.g., compare Abdala 2007; Liu & Olsen 2010; Ruta et al. 2013; Martinelli et al. 2016, 2017b; Wallace et al. 2019; also see summary supertree of Lukic-Walther et al. 2019). Resolving these questions is beyond the scope of this analysis. Here, we assumed the branching order: (Trithelodontidae (Tritylodontidae (Brasilodontidae, Mammaliaformes))), consistent with the analyses of Liu & Olsen (2010), Martinelli et al. (2016), and Wallace et al. (2019).

*Brasilodon* and other taxa of potential relevance to the age of this correlation (e.g., *Botucaratherium*) co-occur with *Riograndia* in the Norian *Riograndia* Assemblage Zone of Brazil (e.g., Martinelli et al. 2016; 2017b). *Adelobasileus* from the Tecovas Formation of Texas (Lucas and Luo 1993), which is likely more closely related to mammals than *Brasilodon*, was shown as having an older occurrence by Martinelli et al. (2017b; also see e.g., Abdala and Gaetano 2018) that potentially implied a Carnian age for this divergence. However, recent work suggests a younger Norian age for *Adelobasileus* (Sarigül 2017). *Tikitherium* and *Gondwanadon* from the Tiki Formation of India (Datta & Das 1996; Datta 2005) have been suggested to be members of Mammaliaformes (e.g., Luo & Martin 2007; Debuysschere et al. 2015; see reviews in Abdala & Gaetano 2018; Martin 2018), and the Tiki Formation typically is biostratigraphically correlated with the Carnian *Hyperodapedon* Assemblage Zone and the Ischigualasto Formation (e.g., Ray et al. 2016; Bhat et al. 2018). If this correlation is correct, it would indicate that divergences between trithelodontids, tritylodontids, and mammaliforms all occurred no later than the late Carnian. The recent discovery of *Pseudotherium* in the Ischigualasto Formation (radiometrically dated to 231.4–225.9 Mya; Martínez et al. 2013b), which may be the sister taxon of Tritylodontidae (Wallace et al. 2019; although see below), provides additional support for a Carnian divergence among these lineages. Therefore, we calibrate this divergence at 233 Mya, in part to accommodate the divergences between *Brasilodon* and mammals and between *Pseudotherium* and tritylodontids (see below).

**Common ancestor of *Pseudotherium* and Tritylodontidae:** Tritylodontids are primarily a post-Triassic radiation of mammaliamorphs, although their oldest records extend into the Late Triassic (see previous and following entries). The recently described species *Pseudotherium argentinus* from the Carnian Ischigualasto Formation of Argentina may be the sister taxon of Tritylodontidae, although branch support for this hypothesis is somewhat weak (Wallace et al. 2019) and ongoing research suggests an alternative phylogenetic placement (A.G. Martinelli, unpublished data). For simplicity, we assumed that *Pseudotherium* is a stem tritylodont because this is the primary hypothesis that has been presented in the literature at this time. The Ischigualasto Formation has been dated radiometrically to 231.4–225.9 Mya (Martínez et al. 2013b), so we calibrate this divergence at 232 Mya.

**Common ancestor of *Tritylodon* and *Oligokyphus*:** *Oligokyphus* is generally considered to be the most stemward tritylodontid (see review in Velazco et al. 2017) and is the only member of the clade that is

well documented from the Late Triassic (Fedak et al. 2015). Putative tritylodontid postcrania reported from the Los Colorados Formation of Argentina, which is Nornian in age (Kent et al. 2014), would constitute an even older record for the group, but a recent re-assessment found that they could only be identified as an indeterminate non-mammaliaform cynodont (Martinelli and Soares 2016; Gaetano et al. 2017). If the possible stem-tritylodontid status of *Pseudotherium* is assumed to be correct (see discussion in Wallace et al. 2019 and above) it provides an even older, potentially Carnian upper bound for divergences among tritylodontids. The locality of the McCoy Brook Formation record of *Oligokyphus* is approximately 201.45 Mya (Fedak et al. 2015), providing a minimum age for this divergence; other material of *Oligokyphus* is of likely Jurassic age or has less precise age constraints (e.g. Clemens & Martins 2014; Whiteside et al. 2016). We calibrate this divergence at 204.9 Mya, the midpoint of the Rhaetian Stage.

**Common ancestor of *Brasilodon* and mammals:** *Brasilodon quadrangularis* occurs in strata assigned to the *Riograndia* Assemblage Zone of the Candelária Sequence (Santa Maria Supersequence) in the Paraná Basin, Brazil (e.g., Bonaparte et al. 2003; Martinelli et al. 2016; 2017b; Guignard et al. 2019). Rocks from this assemblage zone were recently dated at 225.42 Mya (Norian) by Langer et al. (2018). As discussed above (see entry for divergence between Tritylodontidae + *Pseudotherium* and mammals), however, divergences between trithelodontids, tritylodontids, and mammaliaforms all occurred no later than the late Carnian. Therefore, we calibrate this divergence at 232 Mya, slightly older than the radiometric date for the lower Ischigualasto Formation (Martínez et al. 2013b).

**Common ancestor of Morganucodonta and mammals:** Morganucodonts are best known from the latest Triassic and Early Jurassic, but Norian records of the clade also exist (Debuysschere et al. 2015). If *Gondwanadon* is a morganucodont (Datta & Das 1996; Kielan Jaworowska et al. 2004; Debuysschere et al. 2015) it would push the first appearance of the clade into the Carnian, based on the biostratigraphical correlation of the Tiki Formation with the Carnian *Hyperodapedon* Assemblage Zone and the Ischigualasto Formation (e.g., Ray et al. 2016; Bhat et al. 2018). The presence of the putative docodont or docodont relative *Tikitherium* in the Tiki Formation (Datta 2005; Luo & Martin 2007; Luo et al. 2015; Panciroli et al. 2019) also implies that morganucodonts must have diverged by the Carnian because Docodonta is consistently recovered crownward of Morganucodonta in mammaliaform phylogenetic analyses (e.g., see reviews in Abdala & Gaetano 2018; Martin 2018). We calibrate this divergence at 230.5 Mya, slightly younger than the radiometric date of 231.4 Mya for the Ischigualasto Formation, but still within the Carnian.

**Common ancestor of *Morganucodon watsoni* and *Morganucodon oehleri*:** Despite early occurrences of morganucodontans as early as the late Early Rhaetian from the Howell quarry in Wales (Whiteside et al. 2016), material that can be confidently attributed to *Morganucodon watsoni* is only present at the Triassic-Jurassic transition in the St. Brides community (Whiteside et al. 2016). *Morganucodon oehleri*

is known from the Zhangjia'ao Member (sensu Fang et al. 2000) of the Lufeng Formation of China (Luo and Wu 1994), which is considered to be Sinemurian in age based on biostratigraphical comparisons (e.g., Luo and Wu 1994; Sullivan et al. 2013). However, as noted above, there is considerable uncertainty about phylogenetic relationships within Morganucodonta, which complicates identifying the correct calibration point for this divergence. Therefore, we use the age of the oldest species of *Morganucodon*, *Morganucodon peyeri* from the Hallau locality in Switzerland, which is dated as late Norian to early Rhaetian (Whiteside et al. 2017). We calibrate this divergence at 207 Mya, the latest possible occurrence of *M. peyeri*.

**Common ancestor of *Haldanodon* and mammals:** *Haldanodon exspectatus* is a well-studied docodont known from the Alcobaça Formation of the Guimarães coal mine of Portugal (e.g., Lillegraven and Krusat 1991; Martin 2005; 2018; Ruf et al. 2013), which is considered Kimmeridgian in age (Schudack 2000a, 2000b). *Haldanodon* is well-nested within Docodonta (Meng et al. 2015; Panciroli et al. (2019), and the oldest members of the clade date back to the Bathonian (Panciroli et al. 2019). However, the presence of the putative docodont or docodont relative *Tikitherium* in the Carnian Tiki Formation (Datta 2005; Luo & Martin 2007; Luo et al. 2015; Panciroli et al. 2019) implies a long ghost lineage for Docodonta. Therefore, we calibrate this node at 230 Mya (Carnian), slightly younger than the divergence of Morganucodonta (see above).

**Common ancestor of *Morganucodon* and *Megazostrodon*:** Species of *Morganucodon* and *Megazostrodon* span the Triassic–Jurassic boundary, but the oldest records of both genera are in the Rhaetian (Debuysschere et al. 2015), providing a minimum age for their divergence. Potential records of *Hallutherium* and *Brachyzostrodon* in the Norian of Greenland and Poland (Jenkins et al. 1994; Świło et al. 2014; Debuysschere et al. 2015), and the presence of *Gondwanadon* in the Carnian of India (Datta & Das 1996), could imply an even older divergence time for *Morganucodon* and *Megazostrodon*, depending on the pattern of phylogenetic relationships within Morganucodonta. However, most mammaliaform phylogenetic analyses include few morganucodonts, leaving relationships within the clade (and even the monophyly of the clade) in question (e.g., Rougier et al. 2007; Gaetano & Rougier 2012; Zhou et al. 2013; Close et al. 2015; Luo et al. 2015; Meng et al. 2015; Huttenlocker et al. 2018; Panciroli et al. 2019; also see Abdala & Gaetano 2018). Given this uncertainty, we calibrate this node at the base of the Rhaetian Stage, 208.5 Mya.

**Common ancestor of *Hadrocodium* and mammals:** *Hadrocodium wui* is known from the Early Jurassic (Sinemurian) Lufeng Formation of China (Luo et al. 2001). The maximum age of this divergence is calibrated by the Carnian occurrence of the potential docodont *Tikitherium*, given that docodonts fall stemward of *Hadrocodium* in most recent mammaliaform phylogenies (e.g., Zhou et al. 2013; Close et al. 2015; Luo et al., 2015; Meng et al. 2015; Huttenlocker et al. 2018). The minimum age of this divergence depends strongly on whether the clade Haramiyida falls crownward or stemward



of *Hadrocodium* (e.g., compare results of Zhou et al. 2013; Close et al. 2015; Luo et al., 2015; Meng et al. 2015; Huttenlocker et al. 2018). If the former option is correct, Norian–Rhaetian occurrences of haramiyidans such as *Haramiyavia* and *Thomasia* (Hahn 1973; Jenkins et al. 1997; Clemmensen et al. 2016) would imply that the lineage including *Hadrocodium* must have diverged by the Norian, whereas the latter would suggest a minimum divergence time closer to the Early Jurassic (although note that the analysis of Close et al. 2015 still implies a Triassic age for this node even when *Hadrocodium* is in a more crownward position). Resolving this phylogenetic problem is beyond the scope of this analysis. We calibrate this node at 214 Mya (late Norian), which is consistent with the case where haramiyidans are crownward of *Hadrocodium* and close to the divergence time estimate of Close et al.’s (2015) for a topology in which *Hadrocodium* occupied a more crownward position.

**Common ancestor of *Dryolestes* and *Theria*:** *Dryolestes* and its closest relatives (Dryolestidae) are cladotherian mammals known from the Jurassic and Cretaceous periods. *Dryolestes* itself is best known from the Late Jurassic (Kimmeridgian–Tithonian) of Europe and North America, but other records of Dryolestidae extend back into the Middle Jurassic (see reviews in Kielan-Jaworowska et al. 2004; Martin 2018), with the Bathonian *Anthracoolestes sergeii* representing the oldest well-characterized member of the clade (Averianov et al. 2014). Additional evidence for a divergence of dryolestids by the Bathonian comes from *Amphitherium*, a member of Zatheria (the clade including therian mammals) (e.g., Averianov et al. 2013; Close et al. 2015; Luo et al. 2015; Huttenlocker et al. 2018), which is known from the lower Bathonian Taynton Limestone Formation of England (Butler & Clemens 2001). We calibrate this node at the base of the Bathonian (168.3 Mya).

**Common ancestor of Captorhinidae and Diapsida:** Captorhinidae is a clade of important Permian eureptiles, but only one species is known from the Carboniferous, the Gzhelian *Euconcordia cunninghami* from the Hamilton Quarry of Kansas (Müller & Reisz 2005; Reisz et al. 2016). However, several older (Bashkirian to Moscovian) taxa, including *Hylonomus*, *Brouffia*, and *Paleothyris* likely either fall on the captorhinid stem or diapsid stem, but have been difficult to place phylogenetically (Müller & Reisz 2006). *Hylonomus* is the oldest of these taxa and occurs in the Joggins Formation of Nova Scotia, whose estimated age range is about 319–310 Mya (Reisz and Müller 2004, van Tuinen and Hadly 2004; Benton et al. 2015). We calibrate this node at 319 Mya, which is slightly older than Benton et al.’s (2015) recommendation of 318 Mya for the age of the synapsid-sauropsid divergence.

**Captorhinus and Labidosaurus:** *Labidosaurus* is a derived captorhinid that occurs in the Kungurian Arroyo Formation of Texas (*sensu* Lucas 2006; equivalent to the lower Clear Fork Group of Hentz 1988) (Dodick & Modesto (1995), whereas the first occurrence of the genus *Captorhinus* is represented by records of *Captorhinus laticeps* from the Artinskian Petrolia Formation of Texas (Heaton 1979; taxonomy following Dodick & Modesto 1995; stratigraphy based on Hentz 1988; Lucas 2006; Schneider et al. 2019). Therefore, we calibrate this divergence at 286 Mya, in the mid-Artinskian.

**Common ancestor of *Youngina* and *Sauria*:** *Youngina capensis* is a well-studied stemward diapsid, but recent phylogenetic analyses have differed on whether it represents a distinct lineage or a member of a larger subclade (Younginiformes), as well as the membership of that subclade when present (e.g., Bickelmann et al. 2009; Reisz et al. 2011; Ezcurra et al. 2014; Turner et al. 2017; Simões et al. 2018). For simplicity, we treated *Youngina* as an individual lineage although the inclusion of other putative younginiforms would not result in a dramatic age increase. The earliest occurrence of *Youngina* is in strata of the Hoedemaker Member (Teekloof Formation; Karoo Basin) that are assigned to the *Tropidostoma-Gorgonops* Subzone of the *Endothiodon* Assemblage Zone (Smith & Evans 1996; Day and Smith 2020). This assemblage zone is bracketed by radiometric dates of 259.26 Mya and 256.25 Mya (Day et al. 2015; Day and Smith 2020). However, this occurrence postdates the more crownward divergence of Testudines and Archosauromorpha, which occurred no later than the late Capitanian. Therefore, we calibrate this node at 263 Mya to accommodate the divergence of Testudines and Archosauromorpha.

**Common ancestor of Testudines and Archosauromorpha:** Although our sample does not include any fossil turtles, the age of this node has implications for other calibrations in the diapsid portion of the tree that require some discussion. The phylogenetic position of turtles within Sauropsida has been controversial (see review in Schoch & Sues 2019). A consensus is emerging that turtles are members of Diapsida, but there is still debate over where they fall relative to lepidosauromorphs, archosaurs, and extinct lineages such as sauropterygians (e.g., Lyson et al. 2010; Field et al. 2014; Bever et al. 2015; Crawford et al. 2015; Irisarri et al. 2017; Schoch & Sues 2015; 2018; Li et al. 2018; Simões et al. 2018). Here, we follow the hypothesis that turtles are more closely related to archosaurs than lepidosaurs.

The Permian archosauromorph fossil record is extremely sparse and of limited utility for calibrating this node (e.g., Ezcurra 2016; also next entry). Very little is known of the Permian portion of the turtle lineage but an increasing amount of data suggests that *Eunotosaurus africanus* from the Karoo Basin of South Africa is the oldest known stem turtle (e.g., Lyson et al. 2010; 2013; 2014, 2016; Bever et al. 2015, 2016). Day (2013) and Day et al. (2013) reported that *Eunotosaurus* occurs in the upper portion of the Abrahamskraal Formation and the Poortjie Member of the Teekloof Formation in that Karoo Basin of South Africa (equivalent to the *Eosimops-Glanosuchus* and *Diictodon-Styracocephalus* subzones of the *Tapinocephalus* Assemblage Zone and the *Lycosuchus-Eunotosaurus* Subzone of the *Endothiodon* Assemblage Zones; Day and Rubidge 2020; Day and Smith 2020). Occurrences of *Eunotosaurus* in the upper Abrahamskraal formation are close to the dates of 261.24–260.26 Mya (Capitanian) for the upper *Tapinocephalus* Assemblage Zone (Rubidge et al. 2013; Day et al. 2015). We calibrate this node at 262 Mya (but see discussion in Marjanović 2019).

**Common ancestor of *Prolacerta* and Archosauriformes:** *Prolacerta broomi* and its sister taxon *Kadimakara australiensis* fall near the base of Archosauriformes within Archosauromorpha, and they

occur in Induan (Early Triassic) strata in Antarctica, Australia, and South Africa (e.g., Ezcurra 2016; Spiekman 2018). However, the minimum age of this node is calibrated by the presence of the archosauriform *Archosaurus rossicus* in the upper Changhsingian Vyazniki Assemblage of Russia (e.g., Sennikov & Golubev 2006; 2017). The Russian taxon *Eorasaurus olsoni* could push this divergence farther back into the Permian (Sennikov 1997; Ezcurra et al. 2014; Bernardi et al. 2015; Ezcurra 2016), but its status as an archosauriform (and even a sauropsid) has been challenged (Peacock et al. 2018c). Sennikov & Golubev (2006) considered the Vyazniki Assemblage to be transitional between more typical late Permian tetrapod assemblages and those of the Early Triassic, implying an age close to the Permo–Triassic boundary. We calibrate this node at 254 Mya, near the base of the Changhsingian Stage, although the very limited Permian archosauromorph fossil record raises the possibility that this is an underestimate.

#### **Last Appearance Datum**

**Eothyris:** *Eothyris parkeyi* is known from a single specimen that was collected in the Petrolia Formation of Texas (Reisz et al. 2009). The Petrolia Formation has produced a tetrapod assemblage assigned to the Seymourian Land Vertebrate Faunachron (e.g., Lucas 2006; 2018), which is considered to be middle–late Artinskian in age (Schneider et al. 2019), so we calibrate this last occurrence at 287 Mya.

**Dimetrodon:** *Dimetrodon* is a very abundant and stratigraphically long-ranging genus known from North America and Western Europe (e.g., Romer & Price 1940; Reisz 1986; Berman et al. 2001). *Dimetrodon angelensis* from the San Angelo Formation of Texas (Olson 1962) is the youngest species of *Dimetrodon*, although it is known from limited, fragmentary material. The San Angelo Formation tetrapod assemblage is assigned to the Littlecrotonian Land Vertebrate Faunauchron (Lucas 2006; 2018), and the San Angelo formation is considered to be late Kungurian in age based on fusilinids that occur in the formation (Schneider et al. 2019). Therefore, we calibrate the last occurrence of *Dimetrodon* at 275 Mya.

**Hipposaurus:** *Hipposaurus boonstrai* primarily occurs in the *Diictodon-Styracocephalus* Subzone of the *Tapinocephalus* Assemblage Zone (Abrahamskraal Formation, Karoo Basin, South Africa; Day and Rubidge 2020). The stratigraphically highest specimens of the species range at least as high as the Karelskraal Member of the Abrahamskraal Formation, and one specimen may reach the lower Poortjie Member of the overlying Teekloof Formation, although its exact stratigraphic position is uncertain (Day 2013). The uppermost occurrences of *Hipposaurus* are close to the dates of 261.24–260.26 Mya for the upper *Tapinocephalus* Assemblage Zone (Rubidge et al. 2013; Day et al. 2015). Therefore, we calibrate this last occurrence at 261 Mya.

1232 **Herpetoskylax:** *Herpetoskylax hopsoni* occurs in strata of the Teekloof Formation that are assigned to  
1233 the *Cistecephalus* Assemblage Zone (Karoo Basin, South Africa) (Sidor & Rubidge 2006).  
1234 *Cistecephalus* Assemblage Zone strata are approximately bracketed by radiometric dates of 256.25 Mya  
1235 and 255.2 Mya (Rubidge et al. 2013; Day et al. 2015; Smith 2020). We calibrate this last occurrence at  
1236 255 Mya, near the end of *Cistecephalus* zone times.

1237 **Leucocephalus:** *Leucocephalus wewersi* is known from a single specimen collected in the Hoedemaker  
1238 Member of the Middleton Formation (Karoo Basin South Africa), which is assigned to the  
1239 *Tropidostoma-Gorgonops* Subzone of the *Endothiodon* Assemblage Zone (Day et al. 2018a; Day and  
1240 Smith 2020). The *Tropidostoma-Gorgonops* Subzone is bracketed by radiometric dates of 259.26 Mya  
1241 and 256.25 Mya (Rubidge et al. 2013; Day et al. 2015) and Day and Smith (2020) considered it to begin  
1242 about 258 Mya, so we calibrate its last occurrence at 258 Mya.

1243 **Lemurosaurus:** *Lemurosaurus pricei* is known from rocks of the Balfour and Middleton formations  
1244 (Karoo Basin, South Africa) that are assigned to the *Cistecephalus* Assemblage Zone (Sidor & Welman  
1245 2003; Sidor & Rubidge 2006; Smith 2020). *Cistecephalus* Assemblage Zone strata are approximately  
1246 bracketed by radiometric dates of 256.25 Mya and 255.2 Mya (Rubidge et al. 2013; Day et al. 2015;  
1247 Smith 2020). We calibrate this last occurrence at 255 Mya, near the end of *Cistecephalus* zone times.

1248 **Moschops:** The genus *Moschops* is one of the more abundant tapinocephalid taxa known from the  
1249 Karoo Basin of South Africa, and its stratigraphic range extends into the Karelskraal Member of the  
1250 Abrahamskraal Formation (*Diictodon-Styracocephalus* Subzone of the *Tapinocephalus* Assemblage  
1251 Zone) (Day 2013; Day and Rubidge 2020). Radiometric dates of 261.24 Mya to 260.26 Mya have been  
1252 reported from the upper *Tapinocephalus* Assemblage Zone (Rubidge et al. 2013; Day et al. 2015), and  
1253 we calibrate this last occurrence at 261 Mya.

1254 **Patranomodon:** *Patranomodon nyaphulii* is known from a single specimen collected in rocks of the  
1255 Abrahamskraal Formation (Karoo Basin, South Africa) assigned to the *Eodicynodon* Assemblage Zone  
1256 (Rubidge & Hopson 1996; Rubidge and Day 2020). Dates from near the base of this formation range  
1257 from 268.5–264.6 Mya (Lanci et al. 2013), and the upper portion of the *Tapinocephalus* Assemblage  
1258 Zone has been dated to about 262–261 Mya (Day et al. 2015). We calibrate this last occurrence at 265  
1259 Mya.

1260 **Eodicynodon:** *Eodicynodon oosthuizeni* occurs in the *Eodicynodon* Assemblage Zone of the  
1261 Abrahamskraal Formation (Karoo Basin, South Africa), with its highest occurrence falling in the  
1262 Koornplaats Member (e.g., Day 2013; Day et al. 2018). The last occurrence of *E. oosthuizeni* is  
1263 stratigraphically higher than the occurrence of *Patranomodon* (Day 2013; Day et al. 2018), so we  
1264 calibrate this last occurrence at 264 Mya.

**Diictodon:** Although *Diictodon feliceps* is also known from China and Zambia (Angielczyk & Sullivan 2008), its full temporal range is best documented in the Karoo Basin of South Africa. There, *D. feliceps* ranges through most of the *Daptocephalus* Assemblage Zone (Viglietti et al. 2016; Viglietti 2020). This places it close to the level of Gastaldo et al.'s (2015) radiometric date of 253.48 Mya for the *Lystrosaurus maccaigi*-*Moschorhinus* Subzone, and we calibrate this last occurrence at 253 Mya.

**Pristerodon:** Like *Diictodon*, the temporal range of *Pristerodon mackayi* is best documented in the Karoo Basin, where its last occurrence is in the upper portion of the *Dicynodon*-*Theriongnathus* Subzone of the *Daptocephalus* Assemblage Zone (Viglietti 2020). Therefore, we calibrate this last occurrence at 253.5 Mya, slightly older than Gastaldo et al.'s radiometric date of 253.48 Mya.

**Niassodon:** The single known specimen of *Niassodon mfumukasi* was collected in the K5 Formation of the Metangula Graben (Mozambique), which was with the *Cistecephalus* Assemblage Zone of the Karoo Basin by Castanhinha et al. 2013. However, a detrital zircon-based maximum depositional age of 258.85 Mya for the K5c horizon reported by Araújo et al. (2020) implies an age close to the boundary of the South African *Lycosuchus*-*Eunotosaurus* and *Tropidostoma*-*Gorgonops* subzones of the *Endothiodon* Assemblage Zone (Day and Smith 2020). We use an age of 258 Mya to calibrate this last occurrence.

**Abajudon:** *Abajudon kaayai* has been reported from the Ruhuhu Formation (Ruhuhu Basin, Tanzania) and the Lower Madumabisa Mudstone Formation (Mid-Zambezi Basin, Zambia) (Angielczyk et al. 2014a). In each area, it co-occurs with tapinocephalid dinocephalians (Simon et al. 2010; Sidor et al. 2014), leading to a broad correlation with the *Tapinocephalus* Assemblage Zone of the South African Karoo Basin (Olroyd & Sidor 2017; Day and Rubidge 2020). Radiometric dates of 261.24–260.26 Mya have been reported from the upper *Tapinocephalus* Assemblage Zone (Rubidge et al. 2013; Day et al. 2015; Day and Rubidge 2020) and we calibrate this last occurrence at 260 Mya, in part to accommodate our calibrations for divergence times within Endothiodontia (see above).

**Endothiodon tolani:** *Endothiodon tolani* was first described from the Ruhuhu Formation of Tanzania, where its range appears to be limited to an interval near the Guadalupian-Lopingian boundary (Angielczyk et al. 2014a; Cox & Angielczyk 2015; Olroyd & Sidor 2017). New records from the Metangula Graben of Mozambique (Macungo et al. 2020) and the mid-Zambezi Basin of Zambia (this paper) do not have precisely-constrained ages but could be as young as late Wuchiapingian (~*Cistecephalus* Assemblage Zone of the South African Karoo Basin; Castanhinha et al. 2013; Barbolini et al. 2016; Araújo et al. 2020). Here, we calibrate the last occurrence of *E. tolani* at 258 Mya, reflecting its co-occurrence with *Niassodon* in the K5 Formation (see above), although we acknowledge that it may eventually be shown to have a younger last occurrence as the ages of the Mozambican and Zambian records become more certain.

**Endothiodon bathystoma:** *Endothiodon bathystoma* is stratigraphically and geographically wide-ranging (e.g., Cox 1964; Ray 2000; Boos et al. 2013; Angielczyk et al. 2014b; Cox & Angielczyk 2015; Macungo et al. 2020), but its temporal range is best constrained in the Karoo Basin of South Africa. In the Karoo, *E. bathystoma* ranges into the *Cistecephalus* Assemblage Zone (Smith et al. 2012; Smith 2020), which is approximately bracketed by radiometric dates of 256.25 and 255.2 Mya (Rubidge et al. 2013; Day et al. 2015; Smith et al. 2020). We calibrate this last occurrence at 256 Mya, reflecting the fact that *Endothiodon* does not appear to reach the upper *Cistecephalus* Zone in the Karoo (Viglietti et al. 2016; Smith 2020). Occurrences of *Endothiodon* in the upper Madumabisa Mudstone Formation (Zambia) and the Usili Formation (Tanzania) may imply a slightly later last occurrence because these formations may sample a time interval near the *Cistecephalus/Daptocephalus* assemblage zone boundary (Angielczyk & Kammerer 2017; Angielczyk 2019; Viglietti 2020), but the ages of those formations have not been corroborated with radiometric dates.

**Dicynodontoides:** The genus *Dicynodontoides* is known from India, South Africa, Tanzania, and Zambia (e.g., Ray & Bandyopadhyay 2003; Angielczyk et al. 2009, 2014b), but its temporal range is best constrained in the South African Karoo Basin. There, its last occurrence is very close to the traditionally-recognized Permo–Triassic boundary (Angielczyk et al. 2009; Smith & Botha-Brink 2014; Viglietti et al. 2016; Viglietti 2020). Therefore, we calibrate this last occurrence at 252 Mya.

**Kawingasaurus:** *Kawingasaurus fossilis* is known only from the Usili Formation of the Ruhuhu Basin, Tanzania (Cox 1972). Angielczyk et al. (2014b) correlated the Usili Formation with the Wuchiapingian *Cistecephalus* Assemblage Zone of the Karoo Basin, but more recent work suggests that it may encompass parts of the upper *Cistecephalus* Assemblage Zone and the lower *Daptocephalus* Assemblage Zone (Angielczyk & Kammerer 2017; Angielczyk 2019; also see Sidor et al. 2010; Kammerer 2019; Viglietti 2020). Radiometric dates from the South African Karoo Basin suggest the *Cistecephalus-Daptocephalus* zone boundary is approximately 255.2 Mya (Rubidge et al. 2013; Day et al. 2015; Smith 2020; Viglietti 2020), and Gastaldo et al. (2015) reported a date of 253.48 Mya for the *Lystrosaurus maccaigi-Moschorhinus* Subzone of the *Daptocephalus* Assemblage Zone. We calibrate this last occurrence at 254 Mya, placing it in the *Dicynodon-Theriognathus* Subzone of the *Daptocephalus* Assemblage Zone.

**Kembawacela:** *Kembawacela kitchingi* is a newly-described cistecephalid dicynodont known only from the upper Madumabisa Mudstone Formation of the Luangwa Basin (Zambia) (Angielczyk et al. 2019). Angielczyk et al. (2014b) correlated the upper Madumabisa Mudstone Formation with the Wuchiapingian *Cistecephalus* Assemblage Zone of the Karoo Basin, but more recent work suggests that it may encompass parts of the upper *Cistecephalus* Assemblage Zone and the lower *Daptocephalus* Assemblage Zone (Angielczyk & Kammerer 2017; Angielczyk 2019; also see Sidor et al. 2010; Smith 2020; Viglietti 2020). Radiometric dates from the South African Karoo Basin suggest the *Cistecephalus-*

*Daptocephalus* zone boundary is approximately 255.2 Mya (Rubidge et al. 2013; Day et al. 2015; Smith 2020; Viglietti 2020), and Gastaldo et al. (2015) reported a date of 253.48 Mya for the *Lystrosaurus maccaigi-Moschorhinus* Subzone of the *Daptocephalus* Assemblage Zone. We calibrate this last occurrence at 254 Mya, placing it in *Dicynodon-Theriognathus* Subzone of the *Daptocephalus* Assemblage Zone.

**Oudenodon:** *Oudenodon bainii* is a widespread dicynodont in southern Africa (e.g., Botha & Angielczyk 2007; Sidor et al. 2010; Castanhinha et al. 2013; Angielczyk et al. 2014b), and like many such taxa its temporal range is best known in the South African Karoo Basin. In the Karoo, *Oudenodon* ranges into the *Lystrosaurus maccaigi-Moschorhinus* Subzone of the *Daptocephalus* Assemblage Zone, but disappears some distance below the Permo–Triassic boundary (Smith & Botha-Brink 2014; Viglietti et al. 2016; Viglietti 2020). We calibrate this last occurrence at 253 Mya, taking into account the radiometric date of Gastaldo et al. (2015) for the *Lystrosaurus maccaigi-Moschorhinus* Subzone and the fact that the last occurrence of *Oudenodon* is stratigraphically close to that of *Diictodon* (Viglietti 2020).

**Aulacephalodon:** The specimen of *Aulacephalodon* used in this analysis is an undescribed specimen that originated in the upper Madumabisa Mudstone Formation of the Luangwa Basin, Zambia. Angielczyk et al. (2014b) correlated the upper Madumabisa Mudstone Formation with the Wuchiapingian *Cistecephalus* Assemblage Zone of the Karoo Basin, but more recent work suggests that it may encompass parts of the upper *Cistecephalus* Assemblage Zone and the lower *Daptocephalus* Assemblage Zone (Angielczyk & Kammerer 2017; Angielczyk 2019; also see Sidor et al. 2010; Smith 2020; Viglietti 2020). The stratigraphic range of *Aulacephalodon* is better constrained in the Karoo Basin itself, where it disappears in the lower portion of the *Lystrosaurus maccaigi-Moschorhinus* Subzone of the *Daptocephalus* Assemblage Zone. Radiometric dates from the Karoo Basin suggest the *Cistecephalus-Daptocephalus* zone boundary is approximately 255.2 Mya (Rubidge et al. 2013; Day et al. 2015), and Gastaldo et al. (2015) reported a date of 253.48 Mya for the *Lystrosaurus maccaigi-Moschorhinus* Subzone. We calibrate this last occurrence at 254 Mya, placing it in lower *Daptocephalus* Assemblage Zone times (i.e., the *Dicynodon-Theriognathus* Subzone), reflecting its potentially slightly greater age than the youngest specimens known from the Karoo.

**Lystrosaurus murrayi:** The genus *Lystrosaurus* is famous for its Pangaeian geographic range (e.g., Fröbisch 2009). These occurrences have long been thought to fall in the Early Triassic, but the exact temporal range encompassed by *Lystrosaurus*-bearing strata is somewhat uncertain, particularly in regard to whether any of the strata were deposited in the Olenekian (e.g., Rubidge 2005; Lucas 2010; Schneider et al. 2019). In the South African Karoo Basin, the last occurrence of *L. murrayi* is in the Swartberg Member of the Katberg Formation, slightly below that last occurrence of *L. declivis* in the upper Katberg Formation (both *Lystrosaurus declivis* Assemblage Zone; Botha & Smith 2006, 2007,

1369 2020). We calibrate the last occurrence of *L. murrayi* at 251.2 Mya, the boundary between the Induan  
1370 and the Olenekian.

1371 **Lystrosaurus declivis**: *Lystrosaurus declivis* has a slightly longer stratigraphic range in the South  
1372 African Karoo Basin than *L. murrayi* (Botha and Smith 2006, 2007; 2020). Therefore, we calibrate its  
1373 last occurrence at 251 Mya, in the early Olenekian.

1374 **Sangusaurus**: The genus *Sangusaurus* occurs in the Lifua Member of the Manda Beds (Ruhuhu Basin,  
1375 Tanzania) and the upper Ntawere Formation (Luangwa Basin, Zambia) (Angielczyk et al. 2018).  
1376 Traditionally, these strata have been considered to be Anisian–early Ladinian in age (e.g., Lucas 1998,  
1377 2010; Rubidge 2005; Hancox et al. 2020), but recent dating of biostratigraphically-correlated strata in  
1378 South America suggests a younger, Ladinian–Carnian age may be more likely (e.g., Peacock et al.  
1379 2018a). We calibrate this last occurrence at 237 Mya (latest Ladinian), although we acknowledge the  
1380 uncertainty that accompanies this estimate (e.g., Schneider et al. 2019).

1381 **“Aloposaurus”**: This specimen (GPIT/RE/7124) has been variously assigned to the genera  
1382 *Aloposaurus*, *Aelurosaurus*, and *Gorgonopsia incertae sedis* (see review in Araújo et al. 2017). It was  
1383 collected in *Cistecephalus* Assemblage Zone strata in the South African Karoo Basin (Araújo et al.  
1384 2017), establishing a maximum age for the specimen regardless of its taxonomic assignment. However,  
1385 based on their compositions in the revisions of Sigogneau-Russell (1989) and Gebauer (2007), the  
1386 genera *Aloposaurus* and *Aelurosaurus* both have stratigraphic ranges that extend into the  
1387 *Daptocephalus* Assemblage Zone. We calibrate this last occurrence at 254 Mya, in the *Dicynodon*-  
1388 *Theriongnathus* Subzone of the *Daptocephalus* Assemblage Zone, although we acknowledge that it is  
1389 somewhat uncertain until a firm taxonomic assignment exists for this specimen.

1390 **Lycaenops**: The taxonomy of the genus *Lycaenops* was most recently reviewed by Gebauer (2007),  
1391 who recognized five named species and a possible unnamed sixth species. Some more recent works  
1392 (e.g., Kammerer 2016c) considered certain species historically referred to the genus but did not focus  
1393 on formally revising the genus. Specimens of *Lycaenops* range into the *Lystrosaurus maccaigi*-  
1394 *Moschorhinus* Subzone of the *Daptocephalus* Assemblage Zone (e.g., supplementary data of Viglietti  
1395 et al. 2016; Viglietti 2020). We calibrate this last occurrence at 253 Mya, reflecting Gastaldo et al.'s  
1396 (2015) date of 253.48 Mya for the *Lystrosaurus maccaigi*-*Moschorhinus* Subzone.

1397 **Scylacocephalus**: The specimen in question (BP/1/216) was identified as *Scylacocephalus watermeyri*  
1398 in Benoit et al. (2017b). However, the genus *Scylacocephalus* was considered a synonym of  
1399 *Aelurosaurus* or *Aloposaurus* in the revisions of Sigogneau-Russell (1989) and Gebauer (2007),  
1400 respectively. Based on their compositions in the revisions of Sigogneau-Russell (1989) and Gebauer  
1401 (2007), the genera *Aloposaurus* and *Aelurosaurus* both have stratigraphic ranges that extend into the



1402 *Daptocephalus* Assemblage Zone. We calibrate this last occurrence at 254 Mya, in the *Dicynodon-*  
1403 *Theriognathus* Subzone of the *Daptocephalus* Assemblage Zone, although we acknowledge that it is  
1404 somewhat uncertain pending a revision of *Scylacocephalus* in the taxonomic framework for  
1405 Gorgonopsia that is currently emerging (e.g., Kammerer 2016c, 2017; Kammerer & Masyutin 2018a).

1406 **Dixeya**: GPIT/RE/7119 was originally described as *Dixeya nasuta* by von Huene (1950). Sigogneau-  
1407 Russell (1989) and Gebauer (2007) suggested that it may instead represent *Arctognathus*, but Kammerer  
1408 (2015) noted that the specimen differed from more certain *Arctognathus* material and preferred to treat  
1409 *Dixeya* as a valid taxon. Araújo et al. (2017) recently described the endocranial anatomy of this  
1410 specimen but noted that its systematic placement was uncertain. GPIT/RE/7119 was collected in the  
1411 Usili Formation of the Ruhuhu Basin, Tanzania. Based on biostratigraphy, the fossil assemblage of the  
1412 Usili Formation has been considered to correlate with the *Cistecephalus* Assemblage Zone of the South  
1413 African Karoo Basin (Sidor et al. 2010; Angielczyk et al. 2014a, 2014b), although recent discoveries in  
1414 the correlative upper Madumabisa Mudstone Formation of the Zambian Luangwa Basin (Angielczyk  
1415 & Kammerer 2017; Angielczyk 2019; also see Kammerer 2019; Smith 2020; Viglietti 2020) raise the  
1416 possibility that the Usili Formation may span the *Cistecephalus–Daptocephalus* assemblage zone  
1417 boundary. No radiometric dates exist for the Usili Formation, but radiometric dates from the Karoo  
1418 Basin suggest the *Cistecephalus–Daptocephalus* zone boundary is approximately 255.2 Mya (Rubidge  
1419 et al. 2013; Day et al. 2015; Smith 2020; Viglietti 2020), and Gastaldo et al. (2015) reported a date of  
1420 253.48 Mya for the *Lystrosaurus maccaigi–Moschorhinus* Subzone of the *Daptocephalus* Assemblage  
1421 Zone. We calibrate this last occurrence at 254 Mya, which would make it equivalent to the *Dicynodon-*  
1422 *Theriognathus* Subzone of the *Daptocephalus* Assemblage Zone.

1423 **BP/1/155**: BP/1/155 is a gorgonopsian in the collections of the Evolutionary Studies Institute  
1424 (University of the Witwatersrand). Benoit et al. (2016b, 2017c, 2017d) included it in their studies of  
1425 therapsid endocranial anatomy and identified it as *Gorgonopsia* indet. The specimen was collected in  
1426 strata assigned to the *Cistecephalus* Assemblage Zone in the Karoo Basin of South Africa (Benoit et al.  
1427 2017c). *Cistecephalus* Assemblage Zone strata are approximately bracketed by radiometric dates of  
1428 256.25 Mya and 255.2 Mya (Rubidge et al. 2013; Day et al. 2015; Smith 2020). We calibrate this last  
1429 occurrence at 255 Mya, near the end of *Cistecephalus* zone times.

1430 **Euchambesia**: *Euchambesia mirabilis* is known from only two specimens that were collected in strata  
1431 assigned to the *Cistecephalus* Assemblage Zone in the South African Karoo Basin (e.g., Benoit 2016).  
1432 The *Cistecephalus* zone is approximately bracketed by radiometric dates of 256.25 and 255.2 Mya  
1433 (Rubidge et al. 2013; Day et al. 2015; Smith 2020), and we calibrate this last occurrence at 255 Mya.

1434 **Olivierosuchus**: *Olivierosuchus parringtoni* is known from strata assigned to the Early Triassic  
1435 *Lystrosaurus declivis* Assemblage Zone in the Karoo Basin, South Africa (e.g., Botha & Smith 2006;

2020; Huttenlocker & Smith 2017). The *Lystrosaurus declivis* Assemblage Zone is generally considered to be Induan to potentially early Olenekian in age (e.g., Rubidge 2005; Lucas 2010; Schneider et al. 2019; Botha and Smith 2020). We calibrate the last occurrence of *Olivierosuchus* at 251 Mya, in the earliest Olenekian, to accommodate this uncertainty.

**Ictidosuchoides:** *Ictidosuchoides longiceps* has a long stratigraphic range in the Karoo Basin of South Africa, with its latest occurrences falling in the lower *Daptocephalus* Assemblage Zone (Viglietti et al. 2016; Huttenlocker & Smith 2017). Radiometric dates from the South African Karoo Basin suggest the *Cistecephalus-Daptocephalus* zone boundary is approximately 255.2 Mya (Rubidge et al. 2013; Day et al. 2015), and Gastaldo et al. (2015) reported a date of 253.48 Mya for the upper *Daptocephalus* Assemblage Zone. We calibrate this last occurrence at 254 Mya, placing it in lower *Daptocephalus* Assemblage Zone times.

**Microgomphodon:** *Microgomphodon oligocynus* is known from the Burgersdorp Formation of the South African Karoo Basin and the upper Omingonde Formation of the Namibian Otjiwarongo Basin, with the latter record representing its youngest occurrence (Abdala et al. 2014; Hancox et al. 2020). The upper Omingonde Formation is biostratigraphically correlated with the *Dinodontosaurus* Assemblage Zone of the Santa Maria Supersequence, Brazil (e.g., Abdala et al. 2013; Martinelli et al. 2017a; Melo et al. 2017; Peacock et al. 2018a). The *Dinodontosaurus* Assemblage Zone is likely older than 236–237 Mya (e.g., Martinelli et al. 2017a; Melo et al. 2017; Philipp et al. 2018; Schmitt et al. 2019), so we calibrate the last occurrence of *Microgomphodon* at 237 Mya.

**Choerosaurus:** *Choerosaurus dejageri* occurs in the Wuchiapingian *Tropidostoma-Gorgonops* Subzone of the *Endothiodon* Assemblage Zone of the Karoo Basin (Benoit et al. 2016a; Huttenlocker & Smith 2017). The *Tropidostoma-Gorgonops* Subzone is thought to be between 258 Mya and 256.8 Mya in age (Rubidge et al. 2013; Day et al. 2015; Day and Smith 2020). We calibrate this last occurrence at 256.5 Mya, near what is presumably the end of *Tropidostoma-Gorgonops* Subzone time.

**Mupashi:** *Mupashi migrator* is known from a single specimen collected in the upper Madumabisa Mudstone Formation of the Luangwa Basin, Zambia (Huttenlocker & Sidor 2016). Angielczyk et al. (2014b) correlated the upper Madumabisa Mudstone Formation with the Wuchiapingian *Cistecephalus* Assemblage Zone of the Karoo Basin, but more recent work suggests that it may encompass parts of the upper *Cistecephalus* Assemblage Zone and the lower *Daptocephalus* Assemblage Zone (Angielczyk & Kammerer 2017; Angielczyk 2019; also see Sidor et al. 2010; Smith 2020; Viglietti 2020). Radiometric dates from the South African Karoo Basin suggest the *Cistecephalus-Daptocephalus* zone boundary is approximately 255.2 Mya (Rubidge et al. 2013; Day et al. 2015; Smith 2020, Viglietti 2020), and Gastaldo et al. (2015) reported a date of 253.48 Mya for the *Lystrosaurus maccaigi*-

1469 *Moschorhinus* subzone of the *Daptocephalus* Assemblage Zone. We calibrate this last occurrence at  
1470 254 Mya, placing it in the *Dicynodon-Theriognathus* Subzone of the *Daptocephalus* Assemblage Zone.

1471 **Procynosuchus:** *Procynosuchus delaharpeae* is a geographically wide-ranging Permian cynodont (e.g.,  
1472 see review in Kammerer 2016b), but its temporal range is best constrained in the Karoo Basin of South  
1473 Africa. There, it ranges into the *Dicynodon-Theriognathus* Subzone of the *Daptocephalus* Assemblage  
1474 Zone (Viglietti 2020). Gastaldo et al. (2015) reported a date of 253.48 Mya for the overlying  
1475 *Lystrosaurus maccaigi-Moschorhinus* Subzone, so we calibrate the last occurrence of *Procynosuchus*  
1476 at 253.5 Mya.

1477 **Cynosaurus:** *Cynosaurus suppostus* occurs in the upper Wuchiapingian-Changhsingian *Cistecephalus*  
1478 and *Daptocephalus* assemblage zones of South Africa (Van den Brandt & Abdala 2018; Smith 2020;  
1479 Viglietti 2020), and Viglietti (2020) recorded its stratigraphic range as nearly reaching the Permo–  
1480 Triassic boundary. Therefore, we calibrate its last occurrence at 252 Mya.

1481 **Galesaurus:** *Galesaurus planiceps* has a short stratigraphic range in the *Lystrosaurus declivis*  
1482 Assemblage Zone of the Karoo Basin (South Africa) (Botha & Smith 2006, 2020). The *Lystrosaurus*  
1483 *declivis* Assemblage Zone is generally considered to be Induan to potentially early Olenekian in age  
1484 (e.g., Rubidge 2005; Lucas 2010; Schneider et al. 2019; Botha and Smith 2020). We calibrate its last  
1485 occurrence at 251.2 Mya, at the top of the Induan Stage.

1486 **Thrinaxodon:** *Thrinaxodon liorhinus* has a well-documented stratigraphic range that extends through  
1487 the *Lystrosaurus* Assemblage Zone in the South African Karoo Basin (e.g., Botha & Smith 2006, 2020;  
1488 Smith and Botha-Brink 2014), and it is also found in the biostratigraphically-correlated lower Fremouw  
1489 Formation of Antarctica (e.g., Kitching et al. 1972; Colbert and Kitching 1977; Hammer 1990; Peacock  
1490 et al. 2018b). The exact temporal range encompassed by *Lystrosaurus*-bearing strata is somewhat  
1491 uncertain, particularly in regard to whether any of the strata were deposited in the Olenekian (e.g.,  
1492 Rubidge 2005; Lucas 2010; Schneider et al. 2019). We calibrate the last occurrence of *Thrinaxodon* at  
1493 251 Mya, in the earliest Olenekian, to accommodate this uncertainty.

1494 **Trirachodon:** In their recent taxonomic revision, Hopson and Sidor (2018) recognized one valid species  
1495 of *Trirachodon*, *T. berryi*. *Trirachodon berryi* is best known from the *Trirachodon-Kannemeyeria*  
1496 Subzone of the *Cynognathus* Assemblage Zone (Karoo Basin, South Africa; Abdala et al. 2006; Hopson  
1497 & Sidor 2018; Hancox et al. 2020). Additional material from the upper Omingonde Formation of  
1498 Namibia has been referred to *Trirachodon* (Keyser 1973; Smith & Swart 2002), but much of this  
1499 material has been referred to other non-trirachodontid cynodonts subsequently (Abdala et al. 2006;  
1500 Abdala & Smith 2009). A remaining Namibian specimen may represent *T. berryi*, but this identification  
1501 is not completely certain (Abdala et al. 2006). Here, we treat the Namibian record as a valid occurrence

of *Trirachodon*. The upper Omingonde Formation is biostratigraphically correlated with the *Dinodontosaurus* Assemblage Zone of the Santa Maria Supersequence of Brazil (e.g., Abdala et al. 2013; Martinelli et al. 2017a; Melo et al. 2017; Peacock et al. 2018a). The *Dinodontosaurus* Assemblage zone of Brazil (Santa Maria Supersequence) is likely older than 236–237 Mya (e.g., Martinelli et al. 2017a; Melo et al. 2017; Philipp et al. 2018; Schmitt et al. 2019), so we calibrate the last occurrence of *Trirachodon* at 237 Mya.

**Cricodon:** Species of *Cricodon* have been reported from the *Trirachodon-Kannemeyeria* and *Cricodon-Ufudocyclops* subzones of the *Cynoganthus* Assemblage Zone (Karoo Basin, South Africa), the Lifua Member of the Manda Beds (Ruhuhu Basin, Tanzania), and the upper Ntawere Formation (Luangwa Basin, Zambia) (e.g., Abdala et al. 2005; Hopson & Sidor 2018; Peacock et al. 2018a; Hancox et al. 2020). Traditionally, these strata have been considered to be Anisian–early Ladinian in age (e.g., Lucas 1998, 2010; Rubidge 2005; Hancox et al. 2020), but recent dating of biostratigraphically-correlated strata in South America suggests a younger, Ladinian–Carnian age may be more likely (e.g., Peacock et al. 2018a). We calibrate this last occurrence at 237 Mya (latest Ladinian), although we acknowledge the uncertainty that accompanies this estimate.

**Scalenodon:** The genus *Scalenodon* is represented by two species, *S. angustifrons* from the Tanzanian Lifua Member of the Manda Beds and *S. ribeiroae* from the *Dinodontosaurus* Assemblage Zone of the Santa Maria Supersequence, Brazil (e.g., Liu & Abdala 2014; Melo et al. 2017). The *Dinodontosaurus* Assemblage zone of Brazil (Santa Maria Supersequence) is likely older than 236–237 Mya (e.g., Martinelli et al. 2017a; Melo et al. 2017; Philipp et al. 2018; Schmitt et al. 2019), so we calibrate the last occurrence of *Scalenodon* at 237 Mya.

**Luangwa:** The genus *Luangwa* is known from the upper Ntawere Formation of Zambia, the upper Omingonde Formation of Namibia, the Lifua Member of the Manda Beds of Tanzania, and the *Dinodontosaurus* Assemblage Zone of the Santa Maria Supersequence, Brazil (Brink 1963; Abdala & Sa-Teixeira 2004; Abdala & Smith 2009; Peacock et al. 2018a). All of these units have been biostratigraphically correlated with each other (e.g., Martinelli et al. 2017a; Peacock et al. 2018a) and are likely in the range of 236–237 Mya based on the estimated age of the *Dinodontosaurus* Assemblage Zone (e.g., Martinelli et al. 2017a; Melo et al. 2017; Philipp et al. 2018; Schmitt et al. 2019). We calibrate the last occurrence of *Luangwa* at 237 Mya.

**Massetognathus:** The genus *Massetognathus* is known from the *Massetognathus-Chanaresuchus* Assemblage Zone of the Chañares Formation (Argentina) and the *Dinodontosaurus* and *Santacruzodon* assemblage zones of the Santa Maria Supersequence (Brazil) (e.g., Schmitt et al. 2019). The maximum depositional age of the *Santacruzodon* Assemblage Zone is approximately 237 Mya (Philipp et al. 2018); radiometric dates for the Chañares Formation range from approximately 236–233 Mya

(Marsicano et al. 2016; Ezcurra et al. 2017). Based on the date for the upper Chañares Formation, we calibrate the last occurrence of *Massetognathus* at 233 Mya.

**Lumkuia:** *Lumkuia fuzzi* is known from a single specimen collected in the *Trirachodon-Kannemeyeria* Subzone of the *Cynognathus* Assemblage Zone (Karoo Basin, South Africa) (Hopson & Kitching 2001; Hancox et al. 2020). The *Trirachodon-Kannemeyeria* Subzone has generally been regarded as Anisian in age (e.g., Lucas 1998, 2010; Rubidge 2005; Hancox et al. 2020), although it has not been radiometrically dated directly. Recent radiometric dates of strata that are biostratigraphically-correlated with the *Cynognathus* Assemblage Zone have raised the possibility that it parts of it might be substantially younger than previously thought (e.g., Ottone et al. 2014; Marsicano et al. 2016; also see discussion in Peacock et al. 2018a). Detrital zircon crystals from the lower part of the underlying Katberg Formation with a minimum age of  $250 \pm 5$  Mya (Viglietti et al. 2018b) also are consistent with a younger age for the *Cynognathus* Assemblage zone. However, the wide error range on the latter date and the existence of dates for other biostratigraphically-correlated strata more in accordance with the traditional hypothesis (Liu et al. 2018) suggest that further work on the problem is needed (also see Schneider et al. 2019; Hancox et al. 2020). We calibrate the last occurrence of *Lumkuia* at 242 Mya (Anisian–Ladinian boundary), although we acknowledge that its exact age will remain uncertain until the questions surrounding the ages of many Middle–Late Triassic faunal assemblages are more firmly resolved.

**Chiniquodon:** The genus *Chiniquodon* is a geographically-widespread and temporally long-ranging probainognathian cynodont (e.g., Abdala & Gaetano 2018). The latest occurrence of *Chiniquodon* is in the Carnian–Norian Ischigualasto Formation of Argentina (e.g., Martínez & Forster 1996; Abdala & Giannini 2002; Martínez et al. 2013b). Radiometric dates of 231.4 and 225.9 Mya are available for the basal and upper Ischigualasto Formation, respectively (see review in Martínez et al. 2013b). Specimens of *Chiniquodon* are found in the lower Ischigualasto Formation (*Scaphonyx-Exaeretodon-Herrerasaurus* biozone; Martínez et al. 2013b), suggesting they are closer to 231 Mya in age than to 225 Mya. Based on these data, we calibrate the last occurrence of *Chiniquodon* at 230 Mya (late Carnian).

**Riograndia:** *Riograndia guaibensis* is known from the *Riograndia* Assemblage Zone (Candelária Sequence, Santa Maria Supersequence) of the Paraná Basin, Brazil (e.g., Soares et al. 2011). Rocks from this assemblage zone were recently dated at 225.42 Mya (Norian) by Langer et al. (2018). We calibrate the last occurrence of *Riograndia* at 225 Mya.

**Brasilodon:** *Brasilodon quadrangularis* occurs in strata assigned to the *Riograndia* Assemblage Zone of the Candelária Sequence (Santa Maria Supersequence) in the Paraná Basin, Brazil (e.g., Bonaparte et al. 2003; Martinelli et al. 2016; 2017b; Guignard et al. 2019). Rocks from this assemblage zone were

1570 recently dated at 225.42 Mya (Norian) by Langer et al. (2018). We calibrate the last occurrence of  
1571 *Brasilodon* at 225 Mya.

1572 **Pseudotherium:** The only known specimen of *Pseudotherium argentinus* was collected in the upper La  
1573 Peña Member of the Ischigualasto Formation (Ischigualasto-Villa Unión Basin, Argentina), which  
1574 corresponds to the lower *Scaphonyx-Exaeretodon-Herrerasaurus* biozone (Wallace et al. 2019). This is  
1575 close to a radiometrically-dated horizon that has produced an age of 231.4 Mya (Carnian; Martínez et  
1576 al. 2013b). Therefore, we calibrate the last occurrence of *Pseudotherium* at 231 Mya.

1577 **Tritylodon:** *Tritylodon longaevus* is best known from the upper Elliot Formation of South Africa and  
1578 Lesotho, but its range may extend into the lower portion of the overlying Clarens Formation if  
1579 *Tritylodontoides maximus* is a junior synonym of *Tritylodon longaevus* (e.g., for the possible  
1580 synonymy see Hopson and Kitching 1972; Gaetano et al. 2017; for stratigraphic range information see  
1581 Kitching & Raath 1984; Knoll 2005; Sciscio et al. 2017; Bordy et al. 2020; Viglietti et al. 2020). For  
1582 the purposes of this analysis, we assumed that the proposed synonymy is correct. Recent radiometric  
1583 dates suggest that the Clarens Formation ranges in age from 190.5–186.7 Mya, with a preferred  
1584 maximum depositional age of 187.5 Mya (Pliensbachian; Rademan 2018; Bordy et al. 2020; Viglietti  
1585 et al. 2020). We calibrate the last occurrence of *Tritylodon* at 190 Mya, near the older end of this range,  
1586 reflecting the occurrence of the ‘*Tritylodontoides maximus*’ specimen low in the Clarens Formation  
1587 (Kitching and Raath 1984; Bordy et al. 2020; Viglietti et al. 2020). A minor increase in age would be  
1588 needed if the range of *Tritylodon* is restricted to occurrences in the Elliot Formation: preferred maximum  
1589 depositional ages for rock samples from the upper Elliot Formation Range from 191.1 to 202.33 Mya  
1590 (Bordy et al. 2020).

1591 **Oligokyphus:** The genus *Oligokyphus* is known from North America (Sues 1985; Fedak et al. 2015),  
1592 Europe (Hennig 1922; Kühne 1956), and China (Luo & Sun 1993). The youngest occurrences of the  
1593 genus are from the Pliensbachian Kayenta Formation (Sues 1985; Marsh 2014) and Pliensbachian  
1594 fissure-fill deposits in the United Kingdom (Kühne 1956; Whiteside et al. 2016). Marsh (2014) reported  
1595 a date of 183.7 Mya (late Pliensbachian) for the Kayenta Formation, and we calibrate the last occurrence  
1596 of *Oligokyphus* at 183 Mya.

1597 **Morganucodon watsoni:** The stratigraphic range of *Morganucodon watsoni* extends at least until the  
1598 early Sinemurian from the St. Brides palaeo-island tetrapod community preserved in fissure fills in the  
1599 United Kingdom, but it could reach the Pliensbachian based on the associated marine invertebrate fauna  
1600 (Whiteside et al. 2016). We conservatively calibrate this last occurrence at 198 Mya (early Sinemurian).

1601 **Morganucodon oehleri:** *Morganucodon oehleri* is known from the Zhangjia’ao Member (*sensu* Fang  
1602 et al. 2000) of the Lufeng Formation of China (Luo and Wu 1994), which is considered to be Sinemurian

in age based on biostratigraphical comparisons (e.g., Luo and Wu 1994; Sullivan et al. 2013). We calibrate the last occurrence of *M. oehleri* at 191 Mya (latest Sinemurian).

**Megazostrodon:** Although also known from the Rhaetian of Europe (Debuysschere et al. 2015), the youngest records of the genus *Megazostrodon* are known from the Early Jurassic of South Africa and Lesotho. *Megazostrodon rudnerae* occurs in the upper Elliot Formation (e.g., Kitching & Raath 1984; Scisio et al. 2017; Bordy et al. 2020; Viglietti et al. 2020), with some records coming from just below the contact with the overlying Clarens Formation (Gow 1986; Bordy et al. 2020). Recent radiometric dates suggest that the upper Elliot Formation spans the latest Rhaetian or Hettangian to the Sinemurian and that the Clarens Formation is Pliensbachian in age (Scisio et al. 2017; Rademan 2018; Bordy et al. 2020). Therefore, we calibrate the last occurrence of *Megazostrodon* at 191 Mya (latest Sinemurian).

**Haldanodon:** *Haldanodon exspectatus* is known from the Alcobaça Formation of the Guimarota coal mine of Portugal (e.g., Lillegraven and Krusat 1991; Martin 2005; 2018; Ruf et al. 2013), which is considered Kimmeridgian in age (Schudack 2000a, 2000b). We calibrate the last occurrence of *Haldanodon* at 152 Mya, at the end of the Kimmeridgian.

**Hadrocodium:** *Hadrocodium wui* is known from the Zhangjia'ao Member (*sensu* Fang et al. 2000) of the Lufeng Formation of China (Luo et al. 2001), which is considered to be Sinemurian in age based on biostratigraphical comparisons (e.g., Luo and Wu 1994; Sullivan et al. 2013). We calibrate the last occurrence of *Hadrocodium* at 191 Mya (latest Sinemurian).

**Dryolestes:** The genus *Dryolestes* is known from the Late Jurassic (Kimmeridgian–Tithonian) of Europe and North America (e.g., Martin 2018). The youngest records of *Dryolestes* are from high in the Brushy Basin Member of the Morrison Formation of western North America (e.g., Turner & Peterson 1999; Foster 2003). Radiometric dates suggest that these occurrences are early Tithonian in age (e.g., Trujillo et al. 2014; Trujillo & Kowallis 2015). Based on these dates, we calibrate the last occurrence of *Dryolestes* at 151 Mya (earliest Tithonian).

**Diadectes:** The stratigraphically highest occurrences of the genus *Diadectes* are in the Vale Formation (*sensu* Lucas 2006; equivalent to the middle Clear Fork Group of Hentz 1988) of Texas (Kissel 2010). The Vale Formation is assigned to the Redtankian Land Vertebrate Faunachron (e.g., Lucas 2006; 2018), which is considered to be mid-Kungurian (mid-upper Leonardian) in age (Schneider et al. 2019). We calibrate the last occurrence of *Diadectes* at 276 Mya, in the early part of the late Kungurian.

**Captorhinus:** The genus *Captorhinus* has a comparably long stratigraphic range in the early Permian of North America, but its latest reliable occurrences are in the Vale Formation (*sensu* Lucas 2006; equivalent to the middle Clear Fork Group of Hentz 1988) of Texas (e.g., LeBlanc et al. 2015). The Vale Formation is assigned to the Redtankian Land Vertebrate Faunachron (e.g., Lucas 2006; 2018),

1636 which is considered to be mid-Kungurian (mid-upper Leonardian) in age (Schneider et al. 2019). We  
 1637 calibrate the last occurrence of *Captorhinus* at 276 Mya, in the early part of the late Kungurian.

1638 **Labidosaurus:** *Labidosaurus hamatus* occurs in the Arroyo Formation (*sensu* Lucas 2006; equivalent  
 1639 to the lower Clear Fork Group of Hentz 1988) of Texas (Modesto et al. 2007). The Arroyo Formation  
 1640 is assigned to the Redtankian Land Vertebrate Faunachron (e.g., Lucas 2006; 2018), which is considered  
 1641 to be mid-Kungurian (mid-upper Leonardian) in age (Schneider et al. 2019). We calibrate the last  
 1642 occurrence of *Labidosaurus* at 277 Mya, in the early part of the late Kungurian.

1643 **Youngina:** The stratigraphic range of *Youngina capensis* extends into strata assigned to the *Dicynodon-*  
 1644 *Therionathus* Subzone of the *Daptocephalus* Assemblage Zone in the South African Karoo Basin  
 1645 (Viglietti et al. 2016; Viglietti 2020). We calibrate its last occurrence at 254 Mya, taking into account  
 1646 that the *Cistecephalus-Daptocephalus* zone boundary is approximately 255.2 Mya (Rubidge et al. 2013;  
 1647 Day et al. 2015; Smith 2020; Viglietti 2020), and Gastaldo et al.'s (2015) date of 253.48 Mya for the  
 1648 *Lystrosaurus maccaigi-Moschorhinus* Subzone of the *Daptocephalus* Assemblage Zone.

1649 **Prolacerta:** In the Karoo Basin, *Prolacerta broomi* occurs primarily in strata of the Katberg Formation  
 1650 that are assigned to the *Lystrosaurus declivis* Assemblage Zone (e.g., Botha and Smith 2006; 2020). It  
 1651 is also found in the biostratigraphically-correlated lower Fremouw Formation of Antarctica (e.g.,  
 1652 Spiekman 2018). The exact temporal range encompassed by *Lystrosaurus*-bearing strata is somewhat  
 1653 uncertain, particularly in regard to whether any of the strata were deposited in the Olenekian (e.g.,  
 1654 Rubidge 2005; Lucas 2010; Schneider et al. 2019). We calibrate the last occurrence of *Prolacerta* at  
 1655 251 Mya, in earliest Olenekian, to accommodate this uncertainty.

1656 Abdala, F. Redescription of *Platycraniellus elegans* (Therapsida, Cynodontia) from the Lower Triassic  
 1657 of South Africa, and the cladistic relationships of eutheriodonts. *Palaeontology* **50**,591–618 (2007).

1658 Abdala, F. & Giannini N. P. Chiniquodontid cynodonts: systematic and morphometric considerations.  
 1659 *Palaeontology* **45**,1151–1170 (2002).

1660 Abdala, F. & Gaetano L. C. in *The Late Triassic World. Topics in Geobiology, vol. 46* (ed. Tanner, L.)  
 1661 407–445 (Springer, 2018).

1662 Abdala, F. & Sá-Teixeira, A. M. A traversodontid cynodont of African affinity in the South America  
 1663 Triassic. *Palaeontol. Afr.* **40**, 11–22 (2004).

1664 Abdala, F. & Smith, R. M. H. A Middle Triassic cynodont fauna from Namibia and its implications for  
 1665 the biogeography of Gondwana. *Journal of Vertebrate Paleontology* **29**, 837–851(2009).



- 1666 Abdala, F., Hancox, P. J. & Neveling, J. Cynodonts from the uppermost Burgersdorp Formation, South  
1667 Africa, and their bearing on the biostratigraphy and correlation of the Triassic *Cynognathus* Assemblage  
1668 Zone. *J. Vertebr. Paleontol.* **25**, 192–199 (2005).
- 1669 Abdala, F., Neveling, J., & Welman, J. A new trirachodontid cynodont from the lower levels of the  
1670 Burgersdorp Formation (Lower Triassic) of the Beaufort Group, South Africa and the cladistic  
1671 relationships of Gondwanan gomphodonts. *Zool. J. Linn. Soc.* **147**, 383–413 (2006).
- 1672 Abdala, F., Rubidge, B.S. & van den Heever, J. The oldest therocephalians (Therapsida, Eutheriodontia)  
1673 and the early diversification of Therapsida. *Palaeontology* **51**, 1011–1024 (2008).
- 1674 Abdala, F., Marsicano, C. A., Smith, R. M. H. & Swart, R. Strengthening western Gondwanan  
1675 correlations: a Brazilian dicynodont (Synapsida, Anomodontia) in the Middle Triassic of Namibia.  
1676 *Gondwana Res.* **23**, 1151–1162 (2013).
- 1677 Abdala, F., Jashashvili, T., Rubidge, B. S. & van den Heever, J. in *Early Evolutionary History of the*  
1678 *Synapsida* (eds. Kammerer, C. F., Angielczyk, K. D. & Fröbisch, J.) 209–231 (Springer, 2014).
- 1679 Abdala, F., Gaetano, L. C., Smith, R. M. H., & Rubidge, B. S. A new large cynodont from the late  
1680 Permian (Lopingian) of the South African Karoo Basin and its phylogenetic significance. *Zool. J. Linn.*  
1681 *Soc.* **186**, 983–1005 (2019).
- 1682 Amson, E. & Laurin, M. On the affinities of *Tetraceratops insignis*, an Early Permian synapsid. *Acta*  
1683 *Palaeontol. Pol.* 56:301–312 (2011).
- 1684 Angielczyk, K. D. First occurrence of the dicynodont *Digalodon* (Therapsida, Anomodontia) from the  
1685 Lopingian upper Madumabisa Mudstone Formation, Luangwa Basin, Zambia. *Palaeontologia Africana*  
1686 53:219–225 (2019).
- 1687 Angielczyk, K. D. & Kammerer, C. F. The cranial morphology, phylogenetic position and biogeography  
1688 of the upper Permian dicynodont *Compsodon helmoedi* van Hoepen (Therapsida, Anomodontia).  
1689 *Papers Palaeontol.* 3: 513–545 (2017).
- 1690 Angielczyk, K. D. & Sullivan, C.: *Diictodon feliceps* (Owen, 1876), a dicynodont (Therapsida,  
1691 Anomodontia) species with a Pangaeian distribution. *J. Vertebr. Paleontol.* **28**, 788–802 (2008).
- 1692 Angielczyk, K. D. et al. Taxonomic revision and new observations on the postcranial skeleton,  
1693 biogeography, and biostratigraphy of the dicynodont genus *Dicynodontoides*, the senior subjective  
1694 synonym of *Kingoria* (Therapsida, Anomodontia). *J. Vertebr. Paleontol.* 29: 1174–1187 (2009).

1695 Angielczyk, K. D. et al. New dicynodonts (Therapsida, Anomodontia) and updated tetrapod  
1696 stratigraphy of the Permian Ruhuhu Formation (Songea Group, Ruhuhu Basin) of southern Tanzania.  
1697 *J. Vertebr. Paleontol.* **34**, 1408–1426 (2014a).

1698 Angielczyk, K.D. et al. (2014b): Permian and Triassic dicynodont (Therapsida: Anomodontia) faunas  
1699 of the Luangwa Basin, Zambia: taxonomic update and implications for dicynodont biogeography and  
1700 biostratigraphy. In: Kammerer C.F., Angielczyk K.D. & Fröbisch J. (eds.). Early Evolutionary History  
1701 of the Synapsida. Springer, Dordrecht: 93–138.

1702 Angielczyk, K. D., Rubidge, B. S., Day, M. O. & Lin, F A reevaluation of *Brachyprosopus broomi* and  
1703 *Chelydontops altidentalis*, dicynodonts (Therapsida, Anomodontia) from the middle Permian  
1704 *Tapinocephalus* Assemblage Zone of the Karoo Basin, South Africa. *Journal of Vertebrate Paleontology*  
1705 **36**: e1078342 (2016).

1706 Angielczyk, K. D., Hancox, P. J. & Nabavizadeh, A. A redescription of the Triassic kannemeyeriiform  
1707 dicynodont *Sangusaurus* (Therapsida, Anomodontia), with an analysis of its feeding system. In: Sidor,  
1708 C.A. & Nesbitt S. J. (eds.). *Vertebrate and Climatic Evolution in the Triassic Rift Basins of Tanzania*  
1709 *and Zambia*. Society of Vertebrate Paleontology Memoir 17: 189–227 (2018).

1710 Angielczyk, K. D., Benoit, J., & Rubidge, B. S. A new tusked cistecephalid dicynodont (Therapsida,  
1711 Anomodontia) from the upper Permian upper Madumabisa Mudstone Formation, Luangwa Basin,  
1712 Zambia. *Papers in Palaeontology* (2019).

1713 Araújo, R. et al. Aspects of gorgonopsian paleobiology and evolution: insights from the basicranium,  
1714 occiput, osseous labyrinth, vasculature, and neuroanatomy. *PeerJ* **5**:e3119 (2017).

1715 Araújo, R. et al. Biostratigraphic refinement of tetrapod-bearing beds from the Metangula Graben  
1716 (Niassa Province, Mozambique): new radiometric dating and the first Lower Triassic tetrapod fossils  
1717 from Mozambique. *Palaeontologia Africana*, **54**: 56–68 (2020).

1718 Averianov, A. O., Martin T., & Lopatin, A. V. A new phylogeny for basal Trechnotheria and Cladotheria  
1719 and affinities of South American endemic Late Cretaceous mammals. *Naturwissenschaften* **100**:311–  
1720 326 (2013).

1721 Averianov, A. O., Martin, T., and Lopatin, A. The oldest dryolestid mammal from the Middle Jurassic  
1722 of Siberia. *Journal of Vertebrate Paleontology* **34**:924–931 (2014).

1723 Barbolini, N. et al. Resolving the age of Madumabisa fossil vertebrates: palynological evidence from  
1724 the Mid-Zambezi Basin of Zambia. *Palaeogeography, Palaeoclimatology, Palaeoecology* **457**:117–128  
1725 (2016).

- 1726 Belica, M. E. et al. Refining the chronostratigraphy of the Karoo Basin, South Africa:  
1727 magnetostratigraphic constraints support an early Permian age for the Eccia Group. *Geophysical Journal*  
1728 *International* 211:1354–1374 (2017).
- 1729 Bendel, E.-M et al. Cranial anatomy of the gorgonopsian *Cynariops robustus* based on CT-  
1730 reconstruction. *PloS ONE* 13(11): e0207367 (2018).
- 1731 Benoit, J. A review of the “venomous therocephalian” hypothesis and how multiple re-portrayals of  
1732 *Euchambersia* have influenced its success and vice versa. *Bulletin de la Société Géologique de France*  
1733 187:217–224 (2017).
- 1734 Benoit, J. et al. Cranial bosses of *Choerosaurus dejageri* (Therapsida, Therocephalia): earliest evidence  
1735 of cranial display structures in eutheriodonts. *PLoS One* 11 (8):e0161457 (2016a).
- 1736 Benoit, J., Manger, P. R. & Rubidge, B. S. Palaeoneurological clues to the evolution of defining  
1737 mammalian soft tissue traits. *Scientific Reports* 6:25604 (2016b).
- 1738 Benoit, J. et al. The bony labyrinth of late Permian Biarmosuchia: palaeobiology and diversity in non-  
1739 mammalian Therapsida. *Palaeontologia Africana* 52: 58–77 (2017b).
- 1740 Benoit, J. et al. Reappraisal of the envenoming capacity of *Euchambersia mirabilis* (Therapsida,  
1741 Therocephalia) using  $\mu$ CT-scanning techniques. *PLoS One* 12(2):e0172047 (2017a).
- 1742 Benoit, J. et al. Endocranial casts of pre-mammalian therapsids reveal an unexpected neurological  
1743 diversity at the deep evolutionary root of mammals. *Brain, Behavior, and Evolution* **90**, 311–333  
1744 (2017c).
- 1745 Benoit, J. et al. The evolution of the maxillary canal in Probainognathia (Cynodontia, Synapsida):  
1746 reassessment of the homology of the infraorbital foramen in mammalian ancestors. *Journal of*  
1747 *Mammalian Evolution*. (2019).
- 1748 Benson, R. B. J. Interrelationships of basal synapsids: cranial and postcranial morphological partitions  
1749 suggest different topologies. *Journal of Systematic Palaeontology* **10**, 601–624 (2012).
- 1750 Benton, M. J. et al. Preservation of exceptional vertebrate assemblages in Middle Permian  
1751 fluviolacustrine mudstones of Kotel'nich, Russia: stratigraphy, sedimentology, and taphonomy.  
1752 *Palaeogeography, Palaeoclimatology, Palaeoecology* 319–320:58–83 (2012).
- 1753 Benton, M. J., et al. Constraints on the timescale of animal evolutionary history. *Palaeontologia*  
1754 *Electronica* 18.1.1FC: 1–106 (2015).

- 1755 Berman, D. S. Origin and early evolution of the amniote occiput: *Journal of Paleontology* 74:938–956  
1756 (2000).
- 1757 Berman, D. S. Diadectomorphs, amniotes or not? In: Lucas, S. G. (eds.). *The Carboniferous–Permian*  
1758 *Transition*. New Mexico Museum of Natural History and Science Bulletin 60:22–35 (2013).
- 1759 Berman, D. S. et al. A new species of *Dimetrodon* (Synapsida: Sphenacodontidae) from the Lower  
1760 Permian of Germany records first occurrence of genus outside of North America. *Canadian Journal of*  
1761 *Earth Sciences* 38: 803–812 (2001).
- 1762 Berman, D. S, Sumida, S. S. & Lombard, R. E. Reinterpretation of the temporal and occipital regions  
1763 in *Diadectes* and the relationships of diadectomorphs: *Journal of Paleontology* 66:481–499 (1992).
- 1764 Bernardi, M. et al. The origin and early radiation of archosauriforms: integrating the skeletal and  
1765 footprint record. *PloS One* 10(6):e0128449 (2015).
- 1766 Bever, G. S. et al. Evolutionary origin of the turtle skull. *Nature* 525:239–242 (2015).
- 1767 Bever, G. S. et al. The amniote temporal roof and the diapsid origin of the turtle skull. *Zoology* 119:471–  
1768 473 (2016).
- 1769 Bhat, M. S., Ray, S. & Datta, P. M. A new hybodont shark (Chondrichthyes, Elasmobranchii) from the  
1770 Upper Triassic Tiki Formation of India with remarks on its dental histology and biostratigraphy. *Journal*  
1771 *of Paleontology* 92:221–239 (2018).
- 1772 Bickelmann, C., Müller, J., & Reisz, R. R. The enigmatic diapsid *Acerosodontosaurus piveteaui*  
1773 (Reptilia: Neodiapsida) from the Upper Permian of Madagascar and the paraphyly of “younginiform”  
1774 reptiles. *Canadian Journal of Earth Sciences* 46:651–661 (2009).
- 1775 Bonaparte, J. F. Los tetrápodos del sector superior de la Formación Los Colorados, La Rioja, Argentina  
1776 (Triásico Superior). *Opera Lilloana* 22:87–102 (1971).
- 1777 Bonaparte, J. F. & Crompton, A. W. Origin and relationships of the Ictidosauria to non-mammalian  
1778 cynodonts and mammals. *Historical Biology* 30:174–182 (2017).
- 1779 Bonaparte, J. F. et al. The sister group of mammals: small cynodonts from the Late Triassic of Southern  
1780 Brazil. *Revista Brasileira de Paleontologia* 5:5–27 (2003).
- 1781 Boos, A. D. S. et al. On the presence of the late Permian dicynodont *Endothiodon* in Brazil.  
1782 *Palaeontology* 56:837–848 (2013).

- 1783 Boos, A. D. S. et al. A tapinocephalid dinocephalian (Synapsida, Therapsida) from the Rio do Rasto  
1784 Formation Paraná Basin, Brazil): taxonomic, onotgenetic and biostratigraphic considerations. *Journal*  
1785 *of South American Earth Sciences* 63:375–384 (2015).
- 1786 Boos, A. D. S. et al. A new dicynodont (Therapsida, Anomodontia) from the Permian of southern Brazil  
1787 and its implications for bidentalians origins. *PloS One* 11(5): e0155000 (2016).
- 1788 Bordy, E. M. et al. A chronostratigraphic framework for the upper Storberg Group: implications for the  
1789 Triassic-Jurassic boundary in southern Africa. *Earth-Science Reviews* 203:103120 (2020).
- 1790 Botha, J. & Angielczyk, K. D. An integrative approach to distinguishing the Late Permian dicynodonts  
1791 *Oudenodon bainii* and *Tropidostoma microtrema* (Therapsida: Anomodontia). *Palaeontology* 50: 1175–  
1792 1209 (2007).
- 1793 Botha J. & Smith, R. M. H. Rapid vertebrate recovery in the Karoo Basin of South Africa following the  
1794 end-Permian extinction. *Journal of African Earth Sciences* 45:502–514 (2006).
- 1795 Botha, J. & Smith, R. M. H. *Lystrosaurus* species composition across the Permo-Triassic Boundary in  
1796 the Karoo Basin of South Africa. *Lethaia* 40, 125–137 (2007).
- 1797 Botha, J., Abdala, F. & Smith, R. The oldest cynodont: new clues on the origin and early diversification  
1798 of the Cynodontia. *Zoological Journal of the Linnean Society* 149:477–492 (2007).
- 1799 Botha, J., & Smith R. M. H. Biostratigraphy of the *Lystrosaurus declivis* Assemblage Zone (Beaufort  
1800 Group, Karoo Supergroup), South Africa. *South African Journal of Geology* 123:207–216 (2020).
- 1801 Brocklehurst, N. et al. A re-description of ‘*Mycterosaurus*’ *smithae*, an early Permian eothyridid, and  
1802 its impact on the phylogeny of pelycosaurian-grade synapsids. *PLoS One* 11(6): e0156810 (2016b).
- 1803 Butler, E., Abdala, F., & Botha-Brink, J. Postcranial morphology of the Early Triassic epicynodont  
1804 *Galesaurus planiceps* (Owen) from the Karoo Basin, South Africa. *Papers in Palaeontology* 5, 1–32  
1805 (2018).
- 1806 Butler, P. M. & Clemens, W. A. Dental morphology of the Jurassic holotherian mammal *Amphitherium*,  
1807 with a discussion of the evolution of mammalian post-canine dental formulae. *Palaeontology* 44, 1–20  
1808 (2001).
- 1809 Carroll, R. L. The earliest reptiles. *Journal of the Linnean Society, Zoology* 45, 61–83 (1964).
- 1810 Castanhinha, R. et al. Bringing dicynodonts back to life: paleobiology and anatomy of a new emydopoid  
1811 genus from the Upper Permian of Mozambique. *PLoS One* 8 (12):e80974 (2013).

- 1812 Clemens, W. A. & Martin, T. Review of the non-tritylodontid synapsids from bone beds in the Rhaetic  
1813 Sandstone, southern Germany. *Paläontologische Zeitschrift* 88:461–479 (2014).
- 1814 Clemmensen, L. B. et al. The vertebrate-bearing Late Triassic Fleming Fjord Formation of central  
1815 Greenland revisited: stratigraphy, palaeoclimate and new palaeontological data. In: Kear, B.P.,  
1816 Lindgren, J., Hurum, J.H., Milàn, J., & Vajda, V. (eds.). *Mesozoic biotas of Scandinavia and its Arctic*  
1817 *Territories*. Geological Society of London, Special Publication 434:31–47 (2016).
- 1818 Close, R. A. et al. Evidence for a mid-Jurassic adaptive radiation in mammals. *Current Biology* **25**,  
1819 2137–2142 (2015).
- 1820 Colbert, E. H. & Kitching, J. W. Triassic cynodont reptiles from Antarctica. *American Museum*  
1821 *Novitates* 2611:1–30 (1977).
- 1822 Conrad, J. & Sidor, C. A. Re-evaluation of *Tetraceratops insignis* (Synapsida: Sphenacodontia). *Journal*  
1823 *of Vertebrate Paleontology* 31(abstract volume), 42A (2001).
- 1824 Cox, C. B. On the palate, dentition and classification of the fossil reptile *Endothiodon* and related  
1825 genera. *American Museum Novitates* 2171: 1–25 (1964).
- 1826 Cox, C. B. A new digging dicynodont from the upper Permian of Tanzania. In: Joysey, K.A. & Kemp,  
1827 T.S. (eds.). *Studies in Vertebrate Evolution*. Oliver and Boyd, Edinburgh: 173–189 (1972).
- 1828 Cox, C. B. & Angielczyk, K. D. A new endothiodont dicynodont (Therapsida, Anomodontia) from the  
1829 Permian Ruhuhu Formation (Songea Group) of Tanzania and its feeding system. *Journal of Vertebrate*  
1830 *Paleontology* 35:e935388 (2015).
- 1831 Crawford, N. G. et al. A phylogenomic analysis of turtles. *Molecular Phylogenetics and Evolution*  
1832 83:250–257 (2014).
- 1833 Datta, P. M. Earliest mammal with transversely expanded upper molar from the Late Triassic (Carnian)  
1834 Tiki Formation, South Rewa Gondwana Basin, India. *Journal of Vertebrate Paleontology* 25:200–207  
1835 (2005).
- 1836 Datta, P. M. & Das, D. P. Discovery of the oldest fossil mammal from India. *Indian Minerals* 50:217–  
1837 222 (1996).
- 1838 David, R. et al. Assessing morphology and function of the semicircular duct system: introducing new  
1839 in-situ visualization and software toolbox. *Sci. Rep.* **6**, 32772 (2016).

1840 Day, M. O. Middle Permian continental biodiversity changes as reflected in the Beaufort Group of South  
1841 Africa: a bio- and lithostratigraphic review of the Eodicynodon, Tapinocephalus and Pristerognathus  
1842 Assemblage Zones. Unpublished PhD dissertation, University of the Witwatersrand, Johannesburg  
1843 (2013).

1844 Day, M. et al. Biostratigraphic correlation in the Karoo: the case of the Middle Permian parareptile  
1845 *Eunotosaurus*. South African Journal of Science **109** (2013).

1846 Day, M. O. et al. When and how did the terrestrial mid-Permian mass extinction occur? Evidence from  
1847 the tetrapod record of the Karoo Basin, South Africa. Proceedings of the Royal Society B 282: 20150834  
1848 (2015).

1849 Day, M. O., Rubidge, B. S. & Abdala, F. A new mid-Permian burnetiamorph therapsid from the main  
1850 Karoo Basin of South Africa and a phylogenetic review of Burnetiamorpha. Acta Palaeontologica  
1851 Polonica 61:701–719 (2016).

1852 Day, M. O. et al. A new species of burnetiid (Therapsida, Burnetiamorpha) from the early  
1853 Wuchiapingian of South Africa and implications for the evolutionary ecology of the family Burnetiidae.  
1854 Papers in Palaeontology **4**, 453–475 (2018a).

1855 Day, M. O. et al. Evolutionary rates of mid-Permian tetrapods from South Africa and the role of  
1856 temporal resolution in turnover reconstruction. Paleobiology **44**, 347–367 (2018b).

1857 Day, M. O. & Rubidge, B. S. Biostratigraphy of the *Tapinocephalus* Assemblage Zone (Beaufort Group,  
1858 Karoo Supergroup), South Africa. South African Journal of Geology **123**, 149–164 (2020).

1859 Day, M. O. & Smith, R. M. H. Biostratigraphy of the *Endothiodon* Assemblage Zone (Beaufort Group,  
1860 Karoo Supergroup), South Africa. South African Journal of Geology **123**, 165–180 (2020).

1861 Debuyschere, M., Gheerbrant, E. & Allain, R. Earliest known European mammals: a review of the  
1862 Morganucodonta from Saint-Nicolas-de-Port (Upper Triassic, France). Journal of Systematic  
1863 Palaeontology 13:825–855 (2015).

1864 Dodick, J. T. & Modesto, S. P. The cranial anatomy of the captorhinid reptile Labidosaurikos meachami  
1865 from the lower Permian of Oklahoma. Palaeontology 38:687–711 (1995).

1866 Ezcurra, M. D. The phylogenetic relationships of basal archosauromorphs, with an emphasis on the  
1867 systematics of proterosuchian archosauriforms. PeerJ 4:e1778 (2016).

1868 Ezcurra, M. D. et al. Deep faunistic turnovers preceded the rise of dinosaurs in southwestern Pangaea.  
1869 Nature Ecology and Evolution 1:1477–1483 (2017).

1870 Ezcurra, M. D., Scheyer, T. M. & Butler, R. J. The origin and early evolution of Sauria: Reassessing the  
1871 Permian saurian fossil record and the timing of the crocodile-lizard divergence. *PloS One* **9**, e89165  
1872 (2014).

1873 Fang, X. et al. Division of Lower, Middle, and Upper Jurassic subdivision in the Lufeng Area, Yunnan.  
1874 Proceedings of the Third National Stratigraphical Conference of China. Beijing, Geological Publishing  
1875 House: 208–214 (2000).

1876 Fedak, T. J., Sues, H.-D., & Olsen, P. E. First record of the tritylodontid cynodont *Oligokyphus* and  
1877 cynodont postcranial bones from the McCoy Brook Formation, of Nova Scotia, Canada. *Canadian*  
1878 *Journal of Earth Sciences* 52:244–249 (2015).

1879 Field, D. J. et al. Toward consilience in reptile phylogeny: miRNAs support an archosaur, not  
1880 lepidosaur, affinity for turtles. *Evolution & Development* 16:189–196 (2014).

1881 Ford, D. P. & Benson, R. B. J. A redescription of *Orovenator mayorum* (Sauropsida, Diapsida) using  
1882 high-resolution  $\mu$ CT, and the consequences for early amniote phylogeny. *Papers in Palaeontology*  
1883 5:197–239 (2019).

1884 Foster, J. R. Paleoecological analysis of the vertebrate fauna of the Morrison Formation (Upper  
1885 Jurassic), Rocky Mountain Region, U.S.A. *New Mexico Museum of Natural History and Science*  
1886 *Bulletin* 23:1–95 (2003).

1887 Fröbisch, J. Composition and similarity of global anomodont-bearing tetrapod faunas. *Earth-Science*  
1888 *Reviews* 95: 119–157 (2009).

1889 Garland, T. The relation between maximal running speed and body mass in terrestrial mammals. *Journal*  
1890 *of Zoology*, 199(2):157-170 (1983).

1891 Gastaldo, R. A. et al. The base of the Lystrosaurus Assemblage Zone, Karoo Basin, predates the end-  
1892 Permian extinction. *Nature Communications* 11:1428 (2020).

1893 Gauthier, J., Kluge, A. J. & Rowe, T. Amniote phylogeny and the importance of fossils. *Cladistics* 4:  
1894 105–209 (1988).

1895 Gaetano, L. C. & Rougier, G. W. First amphilestid from South America. A molariform from the Jurassic  
1896 Cañadon Asfalto Formation, Patagonia, Argentina. *Journal of Mammalian Evolution* 19:235–248  
1897 (2012).

1898 Gaetano, L. C., Abdala F. & Govender R. The postcranial skeleton of the Lower Jurassic *Tritylodon*  
1899 *longaevus* from southern Africa. *Ameghiniana* 54:1–35 (2017).



- 1900 Gastaldo, R. A. et al. Is the vertebrate-defined Permian-Triassic boundary in the Karoo Basin, South  
1901 Africa, the terrestrial expression of the end-Permian marine event? *Geology* 43:939–942 (2015).
- 1902 Gebauer, E. V. I. Phylogeny and evolution of the Gorgonopsia with a special reference to the skull and  
1903 skeleton of GPIT/RE/7113 (*Aelurognathus parringtoni*). Unpublished PhD Dissertation, Eberhard-  
1904 Karls-Universität Tübingen, Tübingen (2007).
- 1905 Golubev, V. K. Dinocephalian stage in the history of the Permian tetrapod fauna of Eastern Europe.  
1906 *Paleontological Journal* 49:1346–1352 (2015).
- 1907 Gow, C. E. A new skull of *Megazostrodon* (Mammalia, Triconodonta) from the Elliot Formation (Lower  
1908 Jurassic) of southern Africa. *Palaeontologia Africana* 20:13–23 (1986).
- 1909 Guignard, M. L., Martinelli, A. G., & Soares, M. B. The postcranial anatomy of *Brasilodon*  
1910 *quadrangularis* and the acquisition of mammaliaform traits among non-mammaliaform cynodonts. *PloS*  
1911 *ONE* 14(5):e0216672 (2019).
- 1912 Hahn, G. Neue Zähne von Haramiyiden aus der deutschen Ober-Trias und ihre Beziehungen zu den  
1913 Multituberculaten. *Palaeontographica, Abteilung A* 142:1–15 (1973).
- 1914 Hammer, W. R. *Thrinaxodon* from Graphite Peak, central Transantarctic Mountains, Antarctica.  
1915 *Antarctic Journal of the United States* 25:37–38 (1990).
- 1916 Hancox, P. J., Neveling, J., & Rubidge, B. S. Biostratigraphy of the *Cynognathus* Assemblage Zone  
1917 (Beaufort Group, Karoo Supergroup), South Africa. *South African Journal of Geology* 123:217–238  
1918 (2020).
- 1919 Heaton, M. J. Cranial anatomy of primitive captorhinid reptiles from the Late Pennsylvanian and Early  
1920 Permian Oklahoma and Texas. *Oklahoma Geological Survey Bulletin* 127:1–84 (1979).
- 1921 Henrickx et al. A new traversodontid cynodont with a peculiar postcanine dentition from the  
1922 Middle/Late Triassic of Namibia and dental evolution in basal gomphodonts. *Journal of Systematic*  
1923 *Palaeontology* 18(20):1669–1706 (2020).
- 1924 Hennig, E. Die Säugerzähne des württembergischen Rhät-Lias-Bonebeds. *Neues Jahrbuch für*  
1925 *Mineralogie, Geologie und Paläontologie, Beilage-Band* 46:181–267 (1922).
- 1926 Hentz, T. F. Lithostratigraphy and paleoenvironments of Upper Paleozoic continental red beds, north-  
1927 central Texas: Bowie (new) and Wichita (revised) groups. *Texas Bureau of Economic Geology Report*  
1928 *of Investigations* 170:1–55 (1988).

- 1929 Hopson, J. A. & Kitching, J. W. A revised classification of cynodonts (Reptilia: Therapsida)  
1930 *Palaeontologia Africana* 14:71–85 (1972).
- 1931 Hopson, J. A. & Kitching, J. W. A probainognathian cynodont from South Africa and the phylogeny of  
1932 nonmammalian cynodonts. *Bulletin of the Museum of Comparative Zoology* 156:3–35 (2001).
- 1933 Huene, F. von. Die Theriodontier des ostafrikanischen Ruhuhu-Gebietes in der Tübinger Sammlung.  
1934 *Neues Jahrbuch für Geologie und Paläontologie* 92:47–136 (1950).
- 1935 Huttenlocker, A. K. & Sidor, C. A. The first karenitid (Therapsida, Therocephalia) from the upper  
1936 Permian of Gondwana and the biogeography of Permo-Triassic therocephalians. *Journal of Vertebrate*  
1937 *Paleontology* 36:e1111897 (2016).
- 1938 Huttenlocker, A. K. & Smith, R. M. H. New whaitsioids (Therapsida: Therocephalia) from the Teekloof  
1939 Formation of South Africa and therocephalian diversity during the end-Guadalupian extinction. *PeerJ*  
1940 5:e3868 (2017).
- 1941 Huttenlocker, A. K., Sidor, C. A. & Smith, R. M. H. A new specimen of *Promoschorhynchus*  
1942 (Therapsida: Therocephalia: Akidnognathidae) from the Lower Triassic of South Africa and its  
1943 implications for theriodont survivorship across the Permo-Triassic boundary. *Journal of Vertebrate*  
1944 *Paleontology* 31:405–421 (2011b).
- 1945 Huttenlocker, A. K. et al. Late-surviving stem mammal links the lowermost Cretaceous of North  
1946 America and Gondwana. *Nature* 558:108–112 (2018).
- 1947 Huttenlocker, A. K. & Sidor, C. A. A basal nonmammaliaform cynodont from the Permian of Zambia  
1948 and the origins of mammalian endocranial and postcranial anatomy. *Journal of Vertebrate Paleontology*.  
1949 DOI: 10.1080/02724634.2020.1827413 (2020).
- 1950 Irisarri, I. et al. Phylotranscriptomic consolidation of the jawed vertebrate timetree. *Nature Ecology &*  
1951 *Evolution* 1:1370–1378 (2017).
- 1952 Jasinowski, S. C. & Abdala, F. Cranial ontogeny of the Early Triassic basal cynodont *Galesaurus*  
1953 *planiceps*. *The Anatomical Record* 300:353–381 (2017a).
- 1954 Jasinowski, S. C. & Abdala, F. Aggregations and parental care in the Early Triassic basal cynodonts  
1955 *Galesaurus planiceps* and *Thrinaxodon liorhinus*. *PeerJ* 5:e2875 (2017b).
- 1956 Jenkins, F. A. Jr., Crompton, A. W. & Downs, W. R. Mesozoic mammals from Arizona: New evidence  
1957 on mammalian evolution. *Science* 222:1233–1235 (1983).

- 1958 Jenkins, F. A. Jr. et al. Late Triassic continental vertebrates and depositional environments of the  
1959 Fleming Fjord Formation, Jameson Land, East Greenland. *Meddelelser om Grønland* 32:3–25 (1994).
- 1960 Jenkins, F. A. Jr. et al. Haramiyids and Triassic mammalian evolution. *Nature* 385:715–718 (1997).
- 1961 Kammerer, C. F. A redescription of *Eriphostoma microdon* Broom, 1911 (Therapsida, Gorgonopsia)  
1962 from the Tapinocephalus Assemblage Zone of South Africa and a review of Middle Permian  
1963 gorgonopsians. In: Kammerer, C.F., Angielczyk, K.D. & Fröbisch, J. (eds.). *Early Evolutionary History*  
1964 *of the Synapsida.*, 171–184 (Springer, 2014).
- 1965 Kammerer, C. F. Cranial osteology of *Arctognathus curvimola*, a short-snouted gorgonopsian from the  
1966 late Permian of South Africa. *Papers in Palaeontology* 1:41–58 (2015).
- 1967 Kammerer, C. F. Two unrecognized burnetiamorph specimens from historical Karoo collections.  
1968 *Palaeontologia Africana* 50: 64–75 (2016a).
- 1969 Kammerer, C. F. A new taxon of cynodont from the Tropidostoma Assemblage Zone (upper Permian)  
1970 of South Africa, and the early evolution of Cynodontia. *Papers in Palaeontology* 2:387–397 (2016b).
- 1971 Kammerer, C. F. Systematics of the Rubidgeinae (Therapsida: Gorgonopsia). *PeerJ* 4: e1608 (2016c).
- 1972 Kammerer, C. F. Anatomy and relationships of the South African gorgonopsian *Arctops* (Therapsida,  
1973 Theriodontia). *Papers in Palaeontology* 3: 583–611 (2017).
- 1974 Kammerer, C. F. The first skeletal evidence of a dicynodont from the lower Elliot Formation of South  
1975 Africa. *Palaeontologia Africana* 52: 102–128 (2018).
- 1976 Kammerer, C. F. Revision of the Tanzanian dicynodont *Dicynodon huenei* (Therapsida: Anomodontia)  
1977 from the Permian Usili Formation. *PeerJ* 7:e7420 (2019).
- 1978 Kammerer, C. F. & Masyutin, V. Gorgonopsian therapsids (*Nochnitsa* gen. nov. and *Viatkogorgon*) from  
1979 the Permian Kotelnich locality of Russia. *PeerJ* 6:e4954 (2018a).
- 1980 Kammerer, C. F. & Smith, R. M. H. An early geikiid dicynodont from the *Tropidostoma* Assemblage  
1981 Zone (late Permian) of South Africa. *PeerJ* 5:e2913 (2017).
- 1982 Kammerer, C. F., Smith, R. M. H., Day, M. O. & Rubidge, B. S. New information on the morphology  
1983 and stratigraphic range of the mid-Permian gorgonopsian *Eriphostoma microdon* Broom, 1911. *Papers*  
1984 *in Palaeontology* 1:201–221 (2015).

- 1985 Kammerer, C. F. et al. A new kannemeyeriiform dicynodont (*Ufudocylops mukanelai*, gen. et sp. nov.)  
 1986 from Subzone C of the Cynognathus Assemblage Zone, Triassic of South Africa, with implications for  
 1987 biostratigraphic correlation with other African Triassic faunas. *Journal of Vertebrate Paleontology*. DOI:  
 1988 10.1080/02724634.2019.1596921 (2019).
- 1989 Kent, D. V. et al. Age constraints on the dispersal of dinosaurs in the Late Triassic from  
 1990 magnetochronology of the Los Colorados Formation (Argentina). *Proceedings of the National Academy*  
 1991 *of Sciences* 111:7958–7963 (2014).
- 1992 Keyser, A. W. A new Triassic vertebrate fauna from South West Africa. *Palaeontologia Africana* 16:1–  
 1993 15 (1973).
- 1994 Kielan-Jaworowska, Z., Cifelli, R. L. & Luo, Z.-X. *Mammals from the Age of Dinosaurs*. Columbia  
 1995 University Press, New York (2004).
- 1996 Kissel, R. Morphology, Phylogeny, and Evolution of Diadectidae (Cotylosauria: Diadectomorpha).  
 1997 Unpublished Ph.D. dissertation, University of Toronto (2010).
- 1998 Kissel, R. A. & Reisz, R. R. *Ambedua pusillus*, new genus, new species, a small diadectid (Tetrapoda:  
 1999 Diadectomorpha) from the Lower Permian of Ohio, with a consideration of diadectomorph phylogeny.  
 2000 *Annals of Carnegie Museum* 73:197–212 (2004b).
- 2001 Kissel, R. A. & Reisz, R. R. Synapsid fauna of the Upper Pennsylvanian Rock Lake Shale near Garnett,  
 2002 Kansas and the diversity pattern of early amniotes. In: Arratia, G., Wilson, M.V.H. & Cloutier, R. (eds.).  
 2003 *Recent Advances in the Origin and Early Radiation of Vertebrates*. Verlag Dr. Friedrich Pfeil, Munich:  
 2004 409–428 (2004b).
- 2005 Kitching, J. W. & Raath, M. A. Fossils from the Elliot and Clarens formations (Karoo Sequence) of the  
 2006 northeastern Cape, Orange Free State and Lesotho, and a suggested biozonation based on tetrapods.  
 2007 *Palaeontologia Africana* 25:111–125 (1984).
- 2008 Kitching J. W. et al. *Lystrosaurus* Zone (Triassic) fauna from Antarctica. *Science* 175:524–527 (1972).
- 2009 Knoll, F. The tetrapod fauna of the Upper Elliot and Clarens formations in the main Karoo Basin (South  
 2010 Africa and Lesotho). *Bulletin de la Société géologique de France* 176: 81–91 (2005).
- 2011 Kruger, A. et al. *Lende chiweta*, a new therapsid from Malawi, and its influence on burnetiamorph  
 2012 phylogeny and biogeography. *Journal of Vertebrate Paleontology* 35:e1008698 (2015).
- 2013 Kühne, W. G. The Liassic therapsid *Oligokyphus*. Trustees of the British Museum, London (1956).

- 2014 Kumar, S. et al. TimeTree: A Resource for Timelines, Timetrees, and Divergence Times. *Mol Biol Evol*  
2015 (2017).
- 2016 Kurkin, A. A. Permian anomodonts: paleobiogeography and distribution of the group. *Paleontological*  
2017 *Journal* 45:432–444 (2011).
- 2018 Lanci, L. et al. Upper Permian magnetic stratigraphy of the lower Beaufort Group, Karoo Basin. *Earth*  
2019 *and Planetary Science Letters* 375:123–134 (2013).
- 2020 Langer, M. C., Ramezani, J. & Da Rosa, Á. A. S. U-Pb age constraints on dinosaur rise from south  
2021 Brazil. *Gondwana Research* 57:133–140 (2018).
- 2022 Laurin, M. & Piñeiro, G. H. A reassessment of the taxonomic position of mesosaurs, and a surprising  
2023 phylogeny of early amniotes. *Frontiers in Earth Science* 5:88 (2017).
- 2024 Laurin, M. & Reisz, R. R. A reevaluation of early amniote phylogeny. *Zoological Journal of the Linnean*  
2025 *Society* 113: 165–223 (1995).
- 2026 Laurin, M. & Reisz, R. R. A new perspective on tetrapod phylogeny. In: Sumida, S.S. & Martin, K.L.M.  
2027 (eds.). *Amniote Origins: Completing the Transition to Land*. Academic Press, San Diego: 9–59 (1997).
- 2028 LeBlanc, A. R. H. et al. Multiple tooth-rowed captorhinids from the early Permian fissure fills of the  
2029 Bally Mountain Locality of Oklahoma. *Vertebrate Anatomy, Morphology, Palaeontology* 1:35–49  
2030 (2015).
- 2031 Lee, M. S. Y. & Spencer P. S. Crown-clades, key characters, and taxonomic stability: when is an amniote  
2032 not an amniote? In: Sumida, S.S. & Martin, K.L.M. (eds.). *Amniote Origins: Completing the Transition*  
2033 *to Land*. 61–84 (Academic Press, 1997).
- 2034 Li, C., et al. A Triassic stem turtle with an edentulous beak. *Nature* 560:476–479 (2018).
- 2035 Lillegraven, J. A. & Krusat, G. Cranio-mandibular anatomy of *Haldanodon exspectatus* (Docodonta;  
2036 Mammalia) from the Late Jurassic of Portugal and its implications to the evolution of mammalian  
2037 characters. *Contributions to Geology, University of Wyoming* 28:39–138 (1991).
- 2038 Liu, J. New progress on the correlation of Chinese terrestrial Permo-Triassic strata. *Vertebrata*  
2039 *PalAsiatica* 56:327–342 (2018).
- 2040 Liu, J. & Abdala, F. Phylogeny and taxonomy of the Traversodontidae. In: Kammerer, C.F., Angielczyk,  
2041 K.D. & Fröbisch, J. (eds.). *Early Evolutionary History of the Synapsida*. 255–279 (Springer, 2014).

- 2042 Liu, J. & Abdala, F. The tetrapod fauna of the upper Permian Naobaogou Formation of China: 1.  
2043 *Shiguainathus wangi* gen. et sp. nov., the first akidnognathid therocephalian from China. PeerJ 5:e4150  
2044 (2017).
- 2045 Liu, J. & Bever, G. S. The last diadectomorph sheds light on Late Palaeozoic tetrapod biogeography.  
2046 Biology Letters 11:20150100 (2015).
- 2047 Liu, J. & Olsen, P. E. The phylogenetic relationships of Eucynodontia (Amniota: Synapsida). Journal  
2048 of Mammalian Evolution 17:151–176 (2010).
- 2049 Liu, J., Rubidge, B. S. & Li, J. New basal synapsid supports Laurasian origin for therapsids. Acta  
2050 Palaeontologica Polonica 54:393–400 (2009).
- 2051 Liu, J., Rubidge, B. S. & Li, J. A new specimen of Biseridens qilianicus indicates its phylogenetic  
2052 position as the most basal anomodont. Proceedings of the Royal Society B 277:285–292 (2010).
- 2053 Liu, J. et al. High precision temporal calibration of Middle Triassic vertebrate biostratigraphy: U=Pb  
2054 zircon constraints for the Sinokannemeyeria Fauna and Yonghesuchus. Vertebrata Palasiatica 56:16–24  
2055 (2018).
- 2056 Liu, J. *Taoheodon baizhijuni*, gen. et sp. nov. (Anomodontia, Dicynodontoidea), from the upper Permian  
2057 Sunjiagou Formation of China and its implications. J. Vertebr. Paleontol. (2020).
- 2058 Lucas, S. G. Global tetrapod biostratigraphy and biochronology. Palaeogeography, Palaeoclimatology,  
2059 Palaeoecology 143:347–384 (1998).
- 2060 Lucas, S. G. Global Permian tetrapod biostratigraphy and biochronology. In: Lucas, S.G., Cassinis, G.  
2061 & Schneider, J.W. (eds.). Non-marine Permian Biostratigraphy and Biochronology. Geological Society  
2062 of London, Special Publication 265: 65–93 (2006).
- 2063 Lucas, S. G. The Triassic timescale based on nonmarine tetrapod biostratigraphy and biogeography. In:  
2064 Lucas, S.G. (ed.). The Triassic Timescale. Geological Society of London, Special Publication 334:447–  
2065 500 (2010).
- 2066 Lucas, S. G. Permian tetrapod biochronology, correlation and evolutionary events. In: Lucas, S.G. &  
2067 Shen, S.Z. (eds.). The Permian Timescale. Geological Society of London, Special Publication 450: 405–  
2068 444 (2018).
- 2069 Lucas, S. G. & Luo, Z.-X. *Adelobasileus* from the Upper Triassic of west Texas: the oldest mammal.  
2070 Journal of Vertebrate Paleontology 13:309–334 (1993).

2071 Lukic-Walther, M. et al. Diversity patterns of nonmammalian cynodonts (Synapsida, Therapsida) and  
 2072 the impact of taxonomic practice and research history on diversity estimates. *Paleobiology* 45:56–69  
 2073 (2019).

2074 Luo, Z. & Sun A. *Oligokyphus* (Cynodontia: Tritylodontidae) from the lower Lufeng Formation (lower  
 2075 Jurassic) of Yunnan, China. *Journal of Vertebrate Paleontology* 13:477–482 (1995).

2076 Luo, Z.-X. & Martin, T. Analysis of molar structure and phylogeny of docodont genera. *Bulletin of*  
 2077 *Carnegie Museum of Natural History* 39:27–47 (2007).

2078 Luo, Z.-X. & Wu, X.-C. The small tetrapods of the Lower Lufeng Formation, Yunnan, China. In: Fraser,  
 2079 N.C. & Sues, H.-D. (eds.). *In the Shadow of the Dinosaurs: Early Mesozoic Tetrapods*. Cambridge  
 2080 University Press, Cambridge: 251–270 (1994).

2081 Luo, Z.-X., Crompton, A. W., & Sun, A.-L. A new mammaliaform from the Early Jurassic and evolution  
 2082 of mammalian characteristics. *Science* 292:1535–1540 (2001).

2083 Luo, Z.-X., et al. Mandibular and dental characteristics of Late Triassic mammaliaform Haramiyavia  
 2084 and their ramifications for basal mammal evolution. *Proceedings of the National Academy of Sciences*  
 2085 112:E7101–7109 (2015).

2086 Lyson, T. R. et al. Transitional fossils and the origin of turtles. *Biology Letters* 6:830–833 (2010).

2087 Lyson, T. R. et al. Evolutionary origin of the turtle shell. *Current Biology* 23:1113–1119 (2013).

2088 Lyson, T. R. et al. Origin of the unique ventilatory apparatus of turtles. *Nature Communications* 5:5211  
 2089 (2014).

2090 Lyson, T. R. et al. Fossorial origin of the turtle shell. *Current Biology* 26:1887–1894 (2016).

2091 Macungo, Z. et al. *Endothiodon* (Therapsida, Anomodontia) specimens from the middle/late Permian  
 2092 of the Metangula Graben (Niassa Province, Mozambique) increase complexity to the taxonomy of the  
 2093 genus. *Journal of African Earth Sciences* (2020).

2094 Maddin, H. C. et al. Varanopid from the Carboniferous of Nova Scotia reveals evidence of parental care  
 2095 in amniotes. *Nature Ecology & Evolution* 4:50–56 (2019).

2096 Maddison, W. P. & Maddison, D. R. Mesquite: a modular system for evolutionary analysis. Version  
 2097 3.51 <http://www.mesquiteproject.org>. (2018).

2098 Mann, A. & Paterson, R. S. Cranial osteology and systematics of the enigmatic early 'sail-backed'  
 2099 synapsid *Echinerpeton intermedium* Reisz, 1972, and a review of the earliest pelycosaurs. *Journal of*  
 2100 *Systematic Palaeontology* (2019).

2101 Mann, A., et al. Reassessment of historic 'microsaurs' from Joggins, Nova Scotia, reveals hidden  
 2102 diversity in the earliest amniote ecosystem. *Papers in Palaeontology* (2020)

2103 Marjanović, D. Recalibrating the transcriptomic timetree of jawed vertebrates. *BioRxiv preprint*. (2019)

2104 Marjanović, D. & Laurin, M. Phylogeny of Paleozoic limbed vertebrates reassessed through revision  
 2105 and expansion of the largest published relevant data matrix. *PeerJ* 6:e5565 (2019).

2106 Marsh, A. D. Preliminary U-Pb detrital zircon dates from the Kayenta Formation of Arizona: *Paleo Bios*  
 2107 32(1, Suppl.): 10 (2014).

2108 Marsicano, C. A. et al. (2016) The precise temporal calibration of dinosaur origins. *Proceedings of the*  
 2109 *National Academy of Sciences* 113:509–513.

2110 Martin, T. Postcranial anatomy of *Haldanodon exspectatus* (Mammalia, Docodonta) from the Late  
 2111 Jurassic (Kimmeridgian) of Portugal and its bearing for mammalian evolution. *Zool. J. Linn. Soc.*  
 2112 145:219–248 (2005).

2113 Martin, T. Mesozoic mammals – early mammalian diversity and ecomorphological adaptations. In:  
 2114 Zachos, F.E., & Asher, R. (eds.) *Handbook of Zoology: Mammalia: Mammalian Evolution, Diversity,*  
 2115 *and Systematics*. De Gruyter, Berlin: 199–299 (2018).

2116 Martinelli, A. G. & Rougier, G. M. On *Chalimania musteloides* (Eucynodontia Trithedontidae) from  
 2117 the Late Triassic of Argentina, and the phylogeny of Ictidosauria. *Journal of Vertebrate Paleontology*  
 2118 27:442–460 (2007).

2119 Martinelli, A. G., Soares, M. B. & Schwanke, C. Two new cynodonts (Therapsida) from the Middle-  
 2120 early Late Triassic of Brazil and comments on South American probainognathians. *PloS ONE*  
 2121 11:e0162945 (2016).

2122 Martinelli, A. G. & Soares, M. B. Evolution of South American cynodonts. *Contribuciones del Museo*  
 2123 *Argentino de Ciencias Naturales “Bernardino Rivadavia”* 6: 183-197 (2016).

2124 Martinelli, A. G. et al. The African cynodont *Aleodon* (Cynodontia, Probainognathia) in the Triassic of  
 2125 southern Brazil and its biostratigraphic significance. *PloS ONE* 12(6):e0177948 (2017a).



- 2126 Martinelli, A. G. et al. A new cynodont from the Santa Maria Formation, south Brazil, improves Late  
2127 Triassic probainognathian diversity. *Papers in Palaeontology* 3:301–423 (2017b).
- 2128 Martinelli, A. G. et al. The Triassic eucynodont *Candelariodon barberenai* revisited and the early  
2129 diversity of stem prozostrodontians. *Acta Palaeontologia Polonica* 62:527–542 (2017c).
- 2130 Martínez, R. N. & Forster, C. A. The skull of *Probelesodon sanjuanensis*, sp. nov., from the Late Triassic  
2131 Ischigualasto Formation of Argentina. *Journal of Vertebrate Paleontology* 16:285–291 (1996).
- 2132 Martínez, R. N., Fernandez, E., & Alcober, O. A. A new non-mammaliaform eucynodont from the  
2133 Carnian-Norian Ischigualasto Formation, northwestern Argentina. *Revista Brasileira de Paleontologia*  
2134 16:61–76 (2013a).
- 2135 Martínez, R. N., et al. Vertebrate succession in the Ischigualasto Formation. In: Sereno, P.C. (ed.). Basal  
2136 sauropodomorphs and the vertebrate fossils record of the Ischigualasto Formation (Late Triassic:  
2137 Carnian-Norian) of Argentina. *Society of Vertebrate Paleontology Memoir* 12:10–30 (2013b).
- 2138 Melo, T. P., Martinelli, A. G., & Soares, M. B. A new gomphodont cynodont (Traversodontidae) from  
2139 the Middle-Late Triassic *Dinodontosaurus* Assemblage Zone of the Santa Maria Supersequence, Brazil.  
2140 *Palaeontology* 60:571–582 (2017).
- 2141 Meng, Q.-J. et al. An arboreal docodont from the Jurassic and mammaliaform ecological diversification.  
2142 *Science* 347:764–768 (2015).
- 2143 Modesto, S. P. et al. The skull and palaeoecological significance of *Labidosaurus hamatus*, a captorhinid  
2144 reptile from the Lower Permian of Texas. *Zoological Journal of the Linnean Society* 149:237–262  
2145 (2007).
- 2146 Müller, J. & Reisz, R. R. An early captorhinid reptile (Amniota, Eureptilia) from the Upper  
2147 Carboniferous of Hamilton, Kansas. *Journal of Vertebrate Paleontology* 25:561–568 (2005).
- 2148 Müller, J. & Reisz, R. R. The phylogeny of early eureptiles: comparing parsimony and Bayesian  
2149 approaches in the investigation of a basal fossil clade. *Systematic Biology* 55:503–511 (2006).
- 2150 Neveling, J. Stratigraphic and sedimentological investigation of the contact between the *Lystrosaurus*  
2151 and the *Cynognathus* assemblage zones (Beaufort Group: Karoo Supergroup). *Council for Geoscience*  
2152 *Bulletin* 137:1–165 (2004).
- 2153 Olivier, C. et al. New dicynodonts (Therapsida, Anomodontia) from near the Permo-Triassic boundary  
2154 of Laos: implications of dicynodont survivorship across the Permo-Triassic mass extinction and the  
2155 paleobiogeography of Southeast Asian blocks. *Journal of Vertebrate Paleontology* (2019)

- 2156 Olroyd, S. L. & Sidor, C. A. A review of the Guadalupian (middle Permian) global tetrapod fossil record.  
2157 Earth-Science Reviews 171:538–597 (2017).
- 2158 Olroyd, S. L., Sidor, C. A. & Angielczyk, K. D. New materials of the enigmatic dicynodont *Abajudon*  
2159 *kaayai* (Therapsida, Anomodontia) from the lower Madumabisa Mudstone Formation, middle Permian  
2160 of Zambia. Journal of Vertebrate Paleontology (2018).
- 2161 Olson, E. C. Late Permian terrestrial vertebrates, U.S.A. and U.S.S.R. Transactions of the American  
2162 Philosophical Society New Series 52: 3–224 (1962).
- 2163 Ottone, E. G. et al. A new Late Triassic age from the Puesto Viejo Group (San Rafael depocenter,  
2164 Argentina): SHRIMP U-Pb zircon dating and biostratigraphic correlations across southern Gondwana.  
2165 Journal of South American Earth Sciences 56:186–199 (2014).
- 2166 Pacheco, C. P. et al. *Prozostrodon brasiliensis*, a probainognathian cynodont from the Late Triassic of  
2167 Brazil: second record and improvements on its dental anatomy. Historical Biology 30:475–485 (2017).
- 2168 Panciroli, E., Benson, R. B. J. & Luo, Z.-X. The mandible and dentition of *Borealestes serendipitus*  
2169 (Docodonta) from the Middle Jurassic of Skye, Scotland. Journal of Vertebrate Paleontology (2019).
- 2170 Pardo, J. D. et al. Hidden morphological diversity among early tetrapods. Nature 546:642–645 (2017).
- 2171 Peacock, B. R. et al. Updated geology and vertebrate paleontology of the Triassic Ntawere Formation  
2172 of northeastern Zambia, with special emphasis on the archosauromorphs. In: Sidor, C.A. & Nesbitt S.  
2173 J. (eds.). Vertebrate and Climatic Evolution in the Triassic Rift Basins of Tanzania and Zambia. Society  
2174 of Vertebrate Paleontology Memoir 17:8–38 (2018a).
- 2175 Peacock, B. R., Smith, R. M. H. & Sidor, C. A. A novel archosauromorph from Antarctica and an  
2176 updated review of a high-latitude vertebrate assemblage in the wake of the end-Permian mass extinction.  
2177 Journal of Vertebrate Paleontology 28(6):e1536664 (2018b).
- 2178 Peacock, B. R. Vertebral osteology of *Hipposaurus boonstrai* (Therapsida, Biarmosuchia) from the  
2179 middle Permian of South Africa, with implications for the evolution of Archosauromorpha. Journal of  
2180 Vertebrate Paleontology, Program and Abstracts, 2018, 195–196 (2018c).
- 2181 Philipp, R. P. et al. Proveniência por U-Pb LA-ICP-MS em zircão detrítico e idade de deposição da  
2182 Formação Santa Maria, Triássico da Bacia do Paraná, RS: evidências da estruturação do Arco do Rio  
2183 Grande; pp. 154–157 in VIII Symposium International on Tectonics–XIV Simpósio Nacional de  
2184 Estudos Tectônicos 2013, 19–23 May 2013, Chapada dos Guimarães, Mato Grosso (2013).

- 2185 Philipp, R. P. et al. Middle Triassic SW Gondwana paleogeography and sedimentary dispersal revealed  
2186 by integration of stratigraphy and U-Pb zircon analysis: The Santa Cruz Sequence, Paraná Basin, Brazil.  
2187 Journal of South American Earth Sciences 88:216–237 (2019).
- 2188 Prum, R. O. et al. A comprehensive phylogeny of birds (Aves) using targeted next-generation DNA  
2189 sequencing. Nature 526:569-573 (2015).
- 2190 Pusch, L. C., Kammerer, C. F., & Fröbisch, J. Cranial anatomy of the early cynodont *Galesaurus*  
2191 *planiceps* and the origin of mammalian endocranial characters. Journal of Anatomy 234:592–  
2192 621(2019).
- 2193 Rabbitt, R. D., Damiano, E. R. & Grant, J. W. Biomechanics of the semicircular canals and otolith  
2194 organs. In The vestibular system (pp. 153-201). Springer, New York, NY (2004).
- 2195 Rademan, Z. Radiometric dating and stratigraphic reassessment of the Elliot and Clarens formations;  
2196 near Maphutseng and Moyeni, Kingdom of Lesotho, southern Africa. Unpublished Master's thesis,  
2197 University of Stellenbosch (2018).
- 2198 Ray, S. Endothiodont dicynodonts from the Late Permian Kundaram Formation, India. Palaeontology  
2199 43:375–404 (2000).
- 2200 Ray, S. & Bandyopadhyay, S. Late Permian vertebrate community of the Pranhita-Godavari Valley,  
2201 India. Journal of Asian Earth Sciences 21:643–654 (2003).
- 2202 Ray, S. et al. Vertebrate fauna from the Late Triassic Tiki Formation of India: new finds and their  
2203 biostratigraphic implications. The Palaeobotanist 65:47–59 (2016).
- 2204 Reisz, R. R. Pelycosaurian reptiles from the Middle Pennsylvanian of North America. Bulletin of the  
2205 Museum of Comparative Zoology 144:27–62 (1972).
- 2206 Reisz, R. R. Pelycosauria. Handbuch der Paläoherpetologie 17A: Gustav Fischer Verlag, Stuttgart  
2207 (1986).
- 2208 Reisz, R. R. The cranial anatomy of basal diadectomorphs and the origin of amniotes. In: Anderson, J.  
2209 S. & Sues, H.-D. (eds.). Major Transitions in Vertebrate Evolution. Indiana University Press,  
2210 Bloomington:228–252 (2007).
- 2211 Reisz, R. R. & Fröbisch, J. The oldest caseid synapsid from the late Pennsylvanian of Kansas, and the  
2212 evolution of herbivory in terrestrial vertebrates. PLoS One 9: e94518 (2014).

- 2213 Reisz, R. R. & Müller, J. Molecular timescales and the fossil record: a paleontological perspective.  
2214 Trends in Genetics 20:237–241 (2004).
- 2215 Reisz, R. R., Godfrey, S. J. & Scott, D. *Eothyris* and *Oedaleops*: do these Early Permian synapsids from  
2216 Texas and New Mexico form a clade? Journal of Vertebrate Paleontology 29: 39–47 (2009).
- 2217 Reisz, R. R., Haridy, Y. & Müller, J. *Euconcordia* nom. nov., a replacement name for the captorhinid  
2218 eureptile Concordia Müller and Reisz, 2005 (non Kingsley, 1880), with new data on its dentition.  
2219 Vertebrate Anatomy Morphology Paleontology 3:1–6 (2016).
- 2220 Reisz, R. R., Modesto, S. P. & Scott, D. M. A new Early Permian reptile and its significance in early  
2221 diapsid evolution. Proceedings of the Royal Society B 278:3731–3737 (2011).
- 2222 Romer, A. S. & Price, L. I. Review of the Pelycosauria. Geological Society of America Special Papers  
2223 28: 1–538 (1940).
- 2224 Rougier, G. W. et al. New Jurassic mammals from Patagonia, Argentina: a reappraisal of  
2225 australosphenidan morphology and interrelationships. American Museum Novitates 3566:1–54 (2007).
- 2226 Rubidge, B. S. Re-uniting lost continents—fossil reptiles from the ancient Karoo and their wanderlust.  
2227 South African Journal of Geology 108:135–172 (2005).
- 2228 Rubidge, B. S. & Hopson, J. A. A primitive anomodont therapsid from the base of the Beaufort Group  
2229 (Upper Permian) of South Africa. Zoological Journal of the Linnean Society 117: 115–139 (1996).
- 2230 Rubidge, B. S. et al. High-precision temporal calibration of Late Permian vertebrate biostratigraphy: U-  
2231 Pb zircon constraints from the Karoo Supergroup, South Africa. Geology 41: 363–366 (2013).
- 2232 Rubidge, B. S. & Day, M. O. Biostratigraphy of the Eodicynodon Assemblage Zone (Beaufort Group,  
2233 Karoo Supergroup), South Africa. South African Journal of Geology 123:141–148 (2020).
- 2234 Ruf, I., Luo, Z.-X., & Martin, T. Reinvestigation of the basicranium of *Haldanodon exspectatus*  
2235 (Mammaliaformes, Docodonta). Journal of Vertebrate Paleontology 33:382–400 (2013).
- 2236 Ruta, M. & Coates, M. I. Dates, nodes, and character conflict: addressing the lissamphibian origin  
2237 problem. Journal of Systematic Palaeontology 5:69–122 (2007).
- 2238 Ruta, M. et al. The radiation of cynodonts and the ground plan of mammalian morphological diversity.  
2239 Proceedings of the Royal Society Series B 280: 20131865 (2013).

- 2240 Ruta, M., Coates, M. I. & Quicke, D. L. J. Early tetrapod relationships revisited. *Biological Reviews*  
2241 78:215–345 (2003).
- 2242 Sarigül, V. New archosauromorph fragments from the Dockum Group of Texas and assessment of the  
2243 earliest dinosaurs in North America. *Historical Biology* 30:1059–1079 (2017).
- 2244 Schmitt, M. R. et al. On the occurrence of the traversodontid *Massetognathus ochagaviae* (Synapsida,  
2245 Cynodontia) in the early Late Triassic *Santacruzodon* Assemblage Zone (Santa Maria Supersequence,  
2246 southern Brazil): Taxonomic and biostratigraphic implications. *Journal of South American Earth*  
2247 *Sciences* 93:36–50 (2019).
- 2248 Schneider, J. W. et al. Late Paleozoic–early Mesozoic continental biostratigraphy — links to the  
2249 Standard Global Chronostratigraphic Scale. *Palaeoworld*. (2019).
- 2250 Schoch, R. R. & Sues, H.-D. A Middle Triassic stem-turtle and the evolution of the turtle body plan.  
2251 *Nature* 523:584–587 (2015).
- 2252 Schoch, R. R. & Sues, H.-D. Osteology of the Middle Triassic stem-turtle *Pappochelys rosinae* and the  
2253 early evolution of the turtle skeleton. *Journal of Systematic Palaeontology* 16:927–965 (2018).
- 2254 Schoch, R. R. & Sues, H.-D. The origin of the turtle body plan: evidence from fossils and embryos.  
2255 *Palaeontology* (2019).
- 2256 Schudack, M. Geological setting and dating of the Guimarota beds. Pp. 21–26 in T. Martin and B. Krebs  
2257 (eds.), *Guimarota: a Jurassic Ecosystem*. (Verlag Dr. Friedrich Pfeil, 2000a).
- 2258 Schudack, M. Ostracods and charophytes from the Guimarota beds. Pp. 33–36 in T. Martin and B. Krebs  
2259 (eds.), *Guimarota: a Jurassic Ecosystem* (Verlag Dr. Friedrich Pfeil, 2000b).
- 2260 Sciscio, L. et al. Magnetostratigraphy across the Triassic-Jurassic boundary in the main Karoo Basin.  
2261 *Gondwana Res.* 177–192 (2017).
- 2262 Sennikov, A. G. An enigmatic reptile from the Upper Permian of the Volga River Basin. *Paleontological*  
2263 *Journal* 31:94–101 (1997).
- 2264 Sennikov, A. G. & Golubev, V. K. Vyazniki Biotic Assemblage of the terminal Permian. *Paleontological*  
2265 *Journal* 40 (suppl.4):S475–S481 (2006).
- 2266 Sennikov, A. G. & Golubev, V. K. Sequence of Permian tetrapod faunas of Eastern Europe and the  
2267 Permian-Triassic ecological crisis. *Paleontological Journal* **51**, 600–611 (2017).

- 2268 Sidor, C. A. & Hopson, J. A. Ghost lineages and “mammalness”: assessing the temporal pattern of  
2269 character acquisition in the Synapsida. *Paleobiology* 24:254–273 (1998).
- 2270 Sidor, C. A. & Hopson, J. A. *Cricodon metabolus* (Cynodontia: Gomphodontia) from the Triassic  
2271 Ntawere Formation of northeastern Zambia: patterns of tooth replacement and a systematic review of  
2272 the Trirachodontidae. In: Sidor, C.A. & Nesbitt S. J. (eds.). *Vertebrate and Climatic Evolution in the*  
2273 *Triassic Rift Basins of Tanzania and Zambia*. Society of Vertebrate Paleontology Memoir 17:39–64  
2274 (2018).
- 2275 Sidor, C. A. & Rubidge, B. S. *Herpetoskylax hopsoni*, a new biarmosuchian (Therapsida: Biarmosuchia)  
2276 from the Beaufort Group of South Africa. In: Carrano, M.T., Gaudin, T.J., Blob, R.W. & Wible, J.R.  
2277 (eds.). *Amniote Paleobiology: Perspectives on the Evolution of Mammals, Birds, and Reptiles*.  
2278 University of Chicago Press, Chicago: 76–113 (2006).
- 2279 Sidor, C. A. & Smith, R. M. H. A second burnetiamorph therapsid from the Permian Teekloof Formation  
2280 of South Africa and its associated fauna. *Journal of Vertebrate Paleontology* 27: 420–430 (2007).
- 2281 Sidor, C. A. & Welman, J. A second specimen of *Lemurosaurus pricei* (Therapsida: Burnetiamorpha).  
2282 *Journal of Vertebrate Paleontology* 23: 631–642 (2003).
- 2283 Sidor, C. A. et al. Tapinocephalids (Therapsida, Dinocephalia) from the Permian Madumabisa  
2284 Mudstone Formation (Lower Karoo, Mid-Zambezi Basin) of southern Zambia. *Journal of Vertebrate*  
2285 *Paleontology* 34: 980–986 (2014).
- 2286 Sidor, C. A. et al. Tetrapod fauna of the lowermost Usili Formation (Songea Group, Ruhuhu Basin) of  
2287 southern Tanzania, with a new burnetiid record. *Journal of Vertebrate Paleontology* 30: 696–703 (2010).
- 2288 Sigogneau-Russell, D. Theriodontia I. *Handbuch der Paläoherpetologie* 17B. Gustav Fischer Verlag,  
2289 Stuttgart (1989).
- 2290 Simões, T. R. et al. The origin of squamates revealed by a Middle Triassic lizard from the Italian Alps.  
2291 *Nature* 557:706–709 (2018).
- 2292 Simon, R. V. et al. First record of a tapinocephalid (Therapsida: Dinocephalia) from the Ruhuhu  
2293 Formation (Songea Group) of southern Tanzania. *Journal of Vertebrate Paleontology* 30: 1289–1293  
2294 (2010).
- 2295 Smith, R. M. H. & Botha-Brink, J. Anatomy of a mass extinction: sedimentological and taphonomic  
2296 evidence for drought-induced die-offs at the Permo-Triassic boundary in the main Karoo Basin, South  
2297 Africa. *Palaeogeography, Palaeoclimatology, Palaeoecology* 15: 99–118 (2014).

- 2298 Smith, R. M. H. & Evans, S. E. New material of Youngina: evidence of juvenile aggregation in Permian  
2299 diapsid reptiles. *Palaeontology* 39:289–303 (1996).
- 2300 Smith, R. M. H. & Keyser, A. W. Biostratigraphy of the Tropidostoma Assemblage Zone. In: Rubidge,  
2301 B.S. (ed.). Biostratigraphy of the Beaufort Group (Karoo Supergroup). South African Committee for  
2302 Stratigraphy Biostratigraphic Series 1:18–22 (1995).
- 2303 Smith, R. M. H. & Swart, R. Changing fluvial environments and vertebrate taphonomy in response to  
2304 climatic drying in a mid-Triassic rift valley fill: the Omingonde Formation (Karoo Supergroup) of  
2305 central Namibia. *Palaios* 17:249–267 (2002).
- 2306 Smith, R. M. H., Rubidge, B. S. & Sidor, C. A. A new burnetiid (Therapsida: Biarmosuchia) from the  
2307 upper Permian of South Africa and its biogeographic implications. *Journal of Vertebrate Paleontology*  
2308 26:331–343 (2006).
- 2309 Smith, R. M. H., Rubidge, B. S. & van der Walt, M. Therapsid biodiversity patterns and environments  
2310 of the Karoo Basin, South Africa. In: Chinsamy-Turan, A. (ed.). *Forerunners of Mammals: Radiation,*  
2311 *Histology, Biology.* Indiana University Press, Bloomington and Indianapolis: 223–246 (2012).
- 2312 Smith, R. M. H. Biostratigraphy of the Cistecephalus Assemblage Zone (Beaufort Group, Karoo  
2313 Supergroup), South Africa. *South African Journal of Geology* 123:181–190 (2020).
- 2314 Soares, M. B., Schultz, C. L., & Horn, B. L. D. New information on Riograndia guaibensis Bonaparte,  
2315 Ferigolo & Ribeiro, 2001 (Eucynodontia, Trithelodontidae) from the Late Triassic of southern Brazil:  
2316 anatomical and biostratigraphic implications. *Anais da Academia Brasileira de Ciências* 83:329–354  
2317 (2011).
- 2318 Spiekman, S. N. F. A new specimen of Prolacerta broomi from the lower Fremouw Formation (Early  
2319 Triassic) of Antarctica, its biogeographical implications and a taxonomic revision. *Scientific Reports*  
2320 8:17996 (2018).
- 2321 Spindler, F. Reviewing the question of the oldest therapsid. – *Paläontologie, Stratigraphie, Fazies* (22),  
2322 *Freiberger Forschungshefte, C* 548: 1–7 (2014).
- 2323 Spindler, F., Falconnet, J. & Fröbisch, J. Callibrachion and Datheosaurus, two historical and previously  
2324 mistaken basal caseasaurian synapsids from Europe. *Acta Palaeontologica Polonica* 61:597–616 (2016).
- 2325 Spindler, F. The skull of *Tetraceratops insignis* (Synapsida, Sphenacodontia. *Palaeovertebrata* 43(1)-e1  
2326 (2020).

- 2327 Stefanello, M. et al. Skull anatomy and phylogenetic assessment of a large specimen of Ecteniniidae  
2328 (Eucynodontia; Probainognathia) from the Upper Triassic of southern Brazil. *Zootaxa* 4457:351–378  
2329 (2018).
- 2330 Sues, H.-D. First record of the tritylodontid *Oligokyphus* (Synapsida) from the lower Jurassic of western  
2331 North America. *Journal of Vertebrate Paleontology* 5:328–335 (1985).
- 2332 Sues, H.-D. & Jenkins, F. A. The postcranial skeleton of *Kayentatherium wellsi* from the Lower  
2333 Jurassic Kayenta Formation of Arizona and the phylogenetic significance of postcranial features. In:  
2334 Carrano, M. T., Gaudin, T.J., Blob, R.W. & Wible, J.R. (eds.). *Amniote Paleobiology: Perspectives on*  
2335 *the Evolution of Mammals, Birds, and Reptiles*. University of Chicago Press, Chicago: 114–152 (2006).
- 2336 Suh, A. The phylogenomic forest of bird trees contains a hard polytomy at the root of Neoaves.  
2337 *Zoologica Scripta* 45:50-62 (2016).
- 2338 Sullivan, C. et al. Pelvic morphology of a tritylodontid (Synapsida: Eucynodontia) from the Lower  
2339 Jurassic of China, and some functional and phylogenetic implications. *Comptes Rendus Palevol*  
2340 12:505–518 (2013).
- 2341 Sumida, S. S. & Berman, D. S. The pelycosaurian (Amniota: Synapsida) assemblage from the Late  
2342 Pennsylvanian Sangre de Cristo formation of central Colorado. *Annals of Carnegie Museum* 62:293–  
2343 310 (1993).
- 2344 Sumida, S. S., Lombard, R. E., & Berman, D. S. Morphology of the atlas-axis complex of the late  
2345 Paleozoic tetrapod suborders Diadectomorpha and Seymouriamorpha: *Philosophical Transactions of*  
2346 *the Royal Society of London B* 336:259–273 (1992).
- 2347 Świło, M. Niedźwiedzki, G. & Sulej, T. Mammal-like tooth from the Upper Triassic of Poland. *Acta*  
2348 *Palaeontologia Polonica* 59:815–820 (2014).
- 2349 Tattersall, G. J. et al. Seasonal reproductive endothermy in tegu lizards. *Science advances*,  
2350 2(1):e1500951 (2016).
- 2351 Tohver, E. et al. Magnetostratigraphic constraints on the age of the lower Beaufort Group, western  
2352 Karoo Basin, South Africa, and a critical analysis of existing U-Pb geochronological data.  
2353 *Geochemistry, Geophysics, Geosystems* 3649–3665(2015).
- 2354 Trujillo, K. C. & Kowallis, B. J. Recalibrated legacy <sup>40</sup>Ar/<sup>39</sup>Ar ages for the Upper Jurassic Morrison  
2355 Formation, Western Interior, U.S.A. *Geology of the Intermountain West* 2:1–8 (2015).



- 2356 Trujillo, K. C. et al. A U/Pb age for the Mygatt-Moore Quarry, Upper Jurassic Morrison Formation,  
2357 Mesa County, Colorado. *Volumina Jurassica* 12:107–114 (2014).
- 2358 Turner, A. H., Pritchard, A. C., & Matzke, N. J. Empirical and Bayesian approaches to fossil-only  
2359 divergence times: a study across three reptile clades. *PloS One* 12(2):e0169885 (2017).
- 2360 Turner, C. E. & Peterson, F. Biostratigraphy of dinosaurs in the Upper Jurassic Morrison Formation of  
2361 the Western Interior, U.S.A. In Gillette, D.D. (ed.). *Vertebrate Paleontology in Utah*. Utah Geological  
2362 Survey Miscellaneous Publication 99-1:77–114 (1999).
- 2363 van Tuinen, M. & Hadly, E. A. Error in estimation of rate and time inferred from the early amniote  
2364 fossil record and avian molecular clocks. *Journal of Molecular Evolution* 59:267–276 (2004).
- 2365 Van den Brandt, M. J. & Abdala, F. Cranial morphology and phylogenetic analysis of *Cynosaurus*  
2366 *suppostus* (Therapsida, Cynodontia) from the upper Permian of the Karoo Basin, South Africa.  
2367 *Palaeontologia Africana* 52:201–221 (2018).
- 2368 Velazco, P. M., Buczek, A. J., & Novacek, M. J. Two new tritylodontids (Synapsida, Cynodontia,  
2369 Mammaliomorpha) from the Upper Jurassic, southwestern Mongolia. *American Museum Novitates*  
2370 3874:1–35 (2017).
- 2371 Viglietti, P.A. et al. The *Daptocephalus* Assemblage Zone (Lopingian), South Africa: A proposed  
2372 biostratigraphy based on a new compilation of stratigraphic ranges. *Journal of African Earth Sciences*  
2373 113:153–164 (2016).
- 2374 Viglietti, P. A., Rubidge, B. S., & Smith, R. M. H. Revised lithostratigraphy of the upper Permian  
2375 Balfour and Teekloof formations of the main Karoo Basin, South Africa. *South African Journal of*  
2376 *Geology* 120:45–60 (2017).
- 2377 Viglietti, P. A., Smith, R. M. H., & Rubidge, B. S. Changing palaeoenvironments and tetrapod  
2378 populations in the *Daptocephalus* Assemblage Zone (Karoo Basin, South Africa) indicate early onset  
2379 of the Permo-Triassic mass extinction. *Journal of African Earth Sciences* 138:102–111 (2018a).
- 2380 Viglietti, P. A. et al. U-Pb detrital zircon dates and provenance data from the Beaufort Group (Karoo  
2381 Supergroup) reflect sedimentary recycling and air-fall tuff deposition in the Permo-Triassic Karoo  
2382 foreland Basin. *Journal of African Earth Sciences* 143:59–66 (2018b).
- 2383 Viglietti, P. A. Biostratigraphy of the *Daptocephalus* Assemblage Zone (Beaufort Group, Karoo  
2384 Supergroup), South Africa. *South African Journal of Geology* 123:191–206 (2020).

- 2385 Viglietti, P. A. et al. Biostratigraphy of the *Massospondylus* Assemblage Zone (Stormberg Group, Karoo  
2386 Supergroup), South Africa. *South African Journal of Geology* 123:149–262 (2020).
- 2387 Wallace, R. V. S., Martínez, R. & Rowe, T. First record of a basal mammalian morph from the early Late  
2388 Triassic Ischigualasto Formation of Argentina. *PloS ONE* 14(8):e0218791 (2019).
- 2389 Whiteside, D. I. et al. The Late Triassic and Early Jurassic fissure faunas from Bristol and South Wales:  
2390 stratigraphy and setting. *Palaeontologia Polonica* 67:257–287 (2016).
- 2391 Yang, W. et al. Depositional environments and cyclo- and chronostratigraphy of uppermost  
2392 Carboniferous–Triassic fluvial–lacustrine deposits, southern Bogda Mountains, NW China — a  
2393 terrestrial paleoclimatic record of mid-latitude Pangea. *Global and Planetary Change* 73:15–113 (2010).
- 2394 Zhou, C.-F. et al. A Jurassic mammaliaform and the earliest mammalian evolutionary adaptations.  
2395 *Nature* 500:163–167 (2013).
