# Supplementary material for: Inner ear biomechanics reveals Late Triassic origin of mammalian endothermy
Source: Research Square preprint supplement (doi:10.21203/rs.3.rs-570966/v1), 2021-06-02
Supplement: Supplementary file 2 [file 36d88030741c9e31d86c5d13.doc]

**SI guide**

**Supplementary Information** (single file)

**Supplementary Methods** – Sampling rationale, Definition of the Thermo-Motility Index, Discussion on the endolymph viscosity of diapsids

**Supplementary Note 1** – *Dimetrodon* photogrammetry

**Supplementary Note 2** – Summary of the statistics

**Supplementary Note 3** – Divergence times and last occurrence datum

**Separate files to upload online**

**Supplementary Data 1 –** Statistical tests on published maximal overall dynamic body acceleration, a proxy for activity.

**Supplementary Data 2 –** Measurements, body temperature, body size variables, Thermo-Motility Indices, details on PLS regressions

**Supplementary Data 3 –** Scan data and specimen provenience

**Supplementary Data 4** – Reproducibility and repeatability tests

**Supplementary Data 5** – Phylogenetic tree of all specimens used in the study
