# Supplementary material for: Inner ear biomechanics reveals Late Triassic origin of mammalian endothermy
Source: Research Square preprint supplement (doi:10.21203/rs.3.rs-570966/v1), 2021-06-02
Supplement: Supplementary file 2 [file 6913fa16f759b919a287e0ab.xlsx]

## Sheet: Scanning information
Genus	Species	Specimen	Scanner	Pixel size x (mm)	Pixel size y (mm)	Pixel size z (mm)	Voltage (kV)	Amperage (µA)	Notes	Public URL	MorphoSource Media Number	Type of data
Caecilia	tentaculata	Kuh 175441	UF Nanoscale Research Facility	0.0773298	0.0773298	0.0773298	110	200	-	-	-	Micro-CT scan
Pelodytes	caucasicus	CAS-H-94059	UF Nanoscale Research Facility	0.0460373	0.0460373	0.0460373	90	190	The files were downloaded from www.MorphoSource.org, Duke University.	https://www.morphosource.org/Detail/MediaDetail/Show/media_id/13930	M13930-24582	Micro-CT scan
Rana	pipiens	-	NA	NA	NA	0.004	NA	NA	Specimen from Mason, M.J., Segenhout, J.M., Cobo-Cuan, A. et al. The Frog Inner Ear: Picture Perfect?. JARO 16, 171–188 (2015). Models were reconstructed from histological sections	-	-	Surface mesh of bony and membranous labyrinth
Eleutherodactylus	limbatus	-	NA	NA	NA	0.004	NA	NA	Specimen from Mason, M.J., Segenhout, J.M., Cobo-Cuan, A. et al. The Frog Inner Ear: Picture Perfect?. JARO 16, 171–188 (2015). Models were reconstructed from histological sections	-	-	Surface mesh of bony and membranous labyrinth
Xenopus	laevis	-	NA	NA	NA	0.004	NA	NA	Specimen from Mason, M.J., Segenhout, J.M., Cobo-Cuan, A. et al. The Frog Inner Ear: Picture Perfect?. JARO 16, 171–188 (2015). Models were reconstructed from histological sections	-	-	Surface mesh of bony and membranous labyrinth
Lissotriton	vulgaris	UF38991	UF Nanoscale Research Facility	0.0121133	0.0121133	0.0121133	80	150	The files were downloaded from www.MorphoSource.org, Duke University.	https://www.morphosource.org/Detail/MediaDetail/Show/media_id/19260	M19260-36432	Micro-CT scan
Proteus	anguinus	MVZ-Herps-244076	GE V|tome|xm240 CT Scanner	0.0180166	0.0180166	0.0180166	90	180	The files were downloaded from www.MorphoSource.org, Duke University.	http://www.morphosource.org/Detail/MediaDetail/Show/media_id/25296	M25296-49510	Micro-CT scan
Diadectes	sideropelicus	FMNH UR 27	GE v|tome|x s 240	0.07107	0.07107	0.07107	220	200	-	-	-	Micro-CT scan
Captorhinus	aguti	TMM 40882-41	GE v|tome|x s 240	0.02117	0.02117	0.02117	110	190	-	-	-	Micro-CT scan
Labidosaurus	hamatus	FMNH UR 161	GE v|tome|x s 240	0.05115	0.05115	0.05115	190	500	-	-	-	Micro-CT scan
Youngina	capensis	BPI/1/375	Xtek XT H 225	0.0238	0.0238	0.0238	110	90	-	-	-	Micro-CT scan
Chelydra	serpentina	UF22159	University of Texas High-Resolution X-ray CT Facility	0.246	0.246	0.246	-	-	-	-	-	Micro-CT scan
Kinosternon	hirpites	Uf Herp 45035	UF Nanoscale Research Facility	0.0745895	0.0745895	0.0745895	14	250	The files were downloaded from www.MorphoSource.org, Duke University.	https://www.morphosource.org/Detail/MediaDetail/Show/media_id/8693	M8693-11063	Micro-CT scan
Chelonia	mydas	YPM HERR 004058	UF Nanoscale Research Facility	0.0391937	0.0391937	0.0391937	100	200	-	https://www.morphosource.org/Detail/MediaDetail/Show/media_id/40231	M40231	Micro-CT scan
Sacalia	quadriocellata	NCSM 76496	UF Nanoscale Research Facility	0.090922	0.090922	0.090922	100	200	-	https://www.morphosource.org/Detail/MediaDetail/Show/media_id/20983	M20983-39874	Micro-CT scan
Graptemys	sp.	Uf Herp 61899	GE v|tome|x s 240	0.074818	0.074818	0.074818	120	250	-	https://www.morphosource.org/Detail/MediaDetail/Show/media_id/22349	M22349-43521	Micro-CT scan
Trachemys	scripta	-	Micro-MRI 11.7 T Bruker Avance DRX500	0.039	0.039	0.039	NA	NA	Specimen from Serjoscha W Evers, James M Neenan, Gabriel S Ferreira, Ingmar Werneburg, Paul M Barrett, Roger B J Benson, Neurovascular anatomy of the protostegid turtle Rhinochelys pulchriceps and comparisons of membranous and endosseous labyrinth shape in an extant turtle, Zoological Journal of the Linnean Society, Volume 187, Issue 3, November 2019, Pages 800–828	-	-	Surface mesh of bony and membranous labyrinth
Prolacerta	broomi	BP/1/3575	Xtek XT H 225	0.0362	0.0362	0.0362	110	90	-	-	-	Micro-CT scan
Alligator	mississipiensis	TMM M-983	SMS 101	0.48	0.48	0.48	-	-	-	-	-	Micro-CT scan
Caiman	crocodylus	FMNH 73711	custom-built Bio-Imaging Research, Inc. (BIR) scanner that used a conventional medical image-intensifier detector	0.142	0.142	0.142	-	-	-	-	-	Micro-CT scan
Tomistoma	schlegelii	CEB 140070	BIR ACTIS5	0.012774	0.012774	0.012774	160	80	Specimen was prepared as described in David et al. 2016 before scanning. Obtained from Leipzig University, Institut of Veterinary Pathology	-	-	Micro-CT scan
Gavialis	gangeticus	MNHN A-5312	X8060 NDT	0.146	0.146	0.146	120	350	-	-	-	Micro-CT scan
Crocodylus	johnstoni	OUVC 10425	University of Texas High-Resolution X-ray CT Facility	0.223	0.223	0.223	-	-	-	-	-	Micro-CT scan
Crocodylus	niloticus	UCL X183	University of Texas High-Resolution X-ray CT Facility	0.246	0.246	0.246	-	-	-	-	-	Micro-CT scan
Crocodylus	moreletii	TMM M-4980	University of Texas High-Resolution X-ray CT Facility	0.5	0.5	0.5	-	-	-	-	-	Micro-CT scan
Crocodylus	intermedius	FMNH 75662	GE LightSpeed Ultra Multislice	0.625	0.625	0.625	120	200	-	-	-	Micro-CT scan
Crocodylus	acutus	FMNH59071	GE LightSpeed Ultra Multislice	0.625	0.625	0.625	120	200	-	-	-	Micro-CT scan
Struthio	camelus	CEB 130023	Skyscan1172	0.013568	0.013568	0.013568	100	100	Specimen was prepared as described in David et al. 2016 before scanning. Obtained from Strauss farm Sachsen	-	-	Micro-CT scan
Apteryx	haastii	NMS Z.1913.13.748	Nikon XT H 225ST	0.0880536	0.0880536	0.0880536	-	-	National Museums of Scotland, Edinburgh provided access to these data originally appearing in Benson et al (2017: Comparative analysis of vestibular ecomorphology in birds, Journal of Anatomy), the collection of which was funded by Natural Environment Research Council (NERC) grants NE/H012176/1 and NE/E008380/1. The files were downloaded from www.MorphoSource.org, Duke University.	http://www.morphosource.org/Detail/MediaDetail/Show/media_id/17247	M17247-32206	Surface mesh of bony labyrinth
Dromaius	novaehollandiae	NHMUK S/2001.50.1	Metris X-Tek HMX ST CT	0.0931	0.0931	0.0931	-	-	-	-	-	Micro-CT scan
Casuarius	casuarius	NHMUK 1939.12.9.964	Metris X-Tek HMX ST CT	0.1487	0.1487	0.1487	-	-	-	-	-	Micro-CT scan
Rhynchotus	rufescens	NMS Z.1890.28.9	Nikon XT H 225ST	0.0564185	0.0564185	0.0564185	-	-	National Museums of Scotland, Edinburgh provided access to these data originally appearing in Benson et al (2017: Comparative analysis of vestibular ecomorphology in birds, Journal of Anatomy), the collection of which was funded by Natural Environment Research Council (NERC) grants NE/H012176/1 and NE/E008380/1. The files were downloaded from www.MorphoSource.org, Duke University.	http://www.morphosource.org/Detail/MediaDetail/Show/media_id/17408	M17408-32673	Surface mesh of bony labyrinth
Meleagris	gallopavo	CEB 130069	Skyscan1172	0.013568	0.013568	0.013568	100	100	Specimen was prepared as described in David et al. 2016 before scanning. Obtained by Alexander Stoessel from a turkey farm in Altengönna, Germany.	-	-	Micro-CT scan
Gallus	gallus	NMS Z.1931.43_Gallus	Nikon XT H 225ST	0.0554408	0.0554408	0.0554408	-	-	National Museums of Scotland, Edinburgh provided access to these data originally appearing in Benson et al (2017: Comparative analysis of vestibular ecomorphology in birds, Journal of Anatomy), the collection of which was funded by Natural Environment Research Council (NERC) grants NE/H012176/1 and NE/E008380/1. The files were downloaded from www.MorphoSource.org, Duke University.	http://www.morphosource.org/Detail/MediaDetail/Show/media_id/17724	M17724-33494	Surface mesh of bony labyrinth
Lophura	diardi	MNHN unvouchered	X8060 NDT	0.08	0.08	0.08	100	150	-	-	-	Micro-CT scan
Phasianus	colchicus	NMS Z.1931.43_Phasanius	Nikon XT H 225ST	0.0579965	0.0579965	0.0579965	-	-	National Museums of Scotland, Edinburgh provided access to these data originally appearing in Benson et al (2017: Comparative analysis of vestibular ecomorphology in birds, Journal of Anatomy), the collection of which was funded by Natural Environment Research Council (NERC) grants NE/H012176/1 and NE/E008380/1. The files were downloaded from www.MorphoSource.org, Duke University.	http://www.morphosource.org/Detail/MediaDetail/Show/media_id/17725	M17725-33499	Surface mesh of bony labyrinth
Coturnix	coturnix	NMS Z.1931.43_Coturnix	Nikon XT H 225ST	0.0316162	0.0316162	0.0316162	-	-	National Museums of Scotland, Edinburgh provided access to these data originally appearing in Benson et al (2017: Comparative analysis of vestibular ecomorphology in birds, Journal of Anatomy), the collection of which was funded by Natural Environment Research Council (NERC) grants NE/H012176/1 and NE/E008380/1. The files were downloaded from www.MorphoSource.org, Duke University.	http://www.morphosource.org/Detail/MediaDetail/Show/media_id/17723	M17723-33489	Surface mesh of bony labyrinth
Cygnus	olor	NHMUK S/1995.11.1	Metris X-Tek HMX ST CT	0.0501	0.0501	0.0501	-	-	-	-	-	Micro-CT scan
Anas	undulata	CEB 130140	Skyscan1173	0.00788575	0.00788575	0.00788575	130	61	Obtained from Leipzig University, Institut of Veterinary Pathology	-	-	Micro-CT scan
Tachyeres	brachypterus	NHMUK S/2004.7.1	Nikon XT H 225ST	0.0594	0.0594	0.0594	-	-	Natural History Museum, London provided access to these data originally appearing in Benson et al (2017: Comparative analysis of vestibular ecomorphology in birds, Journal of Anatomy), the collection of which was funded by Natural Environment Research Council (NERC) grants NE/H012176/1 and NE/E008380/1. The files were downloaded from www.MorphoSource.org, Duke University.	http://www.morphosource.org/Detail/MediaDetail/Show/media_id/17404	M17404-32653	Surface mesh of bony labyrinth
Aythya	fuligula	NHMUK S/1987.27.1	Metris X-Tek HMX ST CT	0.0361	0.0361	0.0361	-	-	-	-	-	Micro-CT scan
Apus	apus	CEB 140032	Skyscan1173	0.007167	0.007167	0.007167	130	61	Specimen was prepared as described in David et al. 2016 before scanning. Obtained from Leipzig University, Veterinary clinic for birds and reptiles	-	-	Micro-CT scan
Selasphorus	rufus	NMS Z.2002.108.2	Nikon XT H 225ST	0.0119	0.0119	0.0119	-	-	National Museums of Scotland, Edinburgh provided access to these data originally appearing in Benson et al (2017: Comparative analysis of vestibular ecomorphology in birds, Journal of Anatomy), the collection of which was funded by Natural Environment Research Council (NERC) grants NE/H012176/1 and NE/E008380/1. The files were downloaded from www.MorphoSource.org, Duke University.	http://www.morphosource.org/Detail/MediaDetail/Show/media_id/17424	M17424-32753	Surface mesh of bony labyrinth
Thalurania	furcata	MNHN 2000-463	X8060 NDT	0.042	0.042	0.042	40	999	-	-	-	Micro-CT scan
Steatornis	caripensis	NHMUK S/1869.6.20.1	Nikon XT H 225ST	0.0353	0.0353	0.0353	-	-	Natural History Museum, London provided access to these data originally appearing in Benson et al (2017: Comparative analysis of vestibular ecomorphology in birds, Journal of Anatomy), the collection of which was funded by Natural Environment Research Council (NERC) grants NE/H012176/1 and NE/E008380/1. The files were downloaded from www.MorphoSource.org, Duke University.	http://www.morphosource.org/Detail/MediaDetail/Show/media_id/17403	M17403-32648	Surface mesh of bony labyrinth
Podargus	strigoides	NHMUK S/1969.4.41	Nikon XT H 225ST	0.0332	0.0332	0.0332	-	-	Natural History Museum, London provided access to these data originally appearing in Benson et al (2017: Comparative analysis of vestibular ecomorphology in birds, Journal of Anatomy), the collection of which was funded by Natural Environment Research Council (NERC) grants NE/H012176/1 and NE/E008380/1. The files were downloaded from www.MorphoSource.org, Duke University.	http://www.morphosource.org/Detail/MediaDetail/Show/media_id/17402	M17402-32643	Surface mesh of bony labyrinth
Caprimulgus	europaeus	NMS Z. unvouchered, cat. num. 27	Nikon XT H 225ST	0.0378707	0.0378707	0.0378707	-	-	National Museums of Scotland, Edinburgh provided access to these data originally appearing in Benson et al (2017: Comparative analysis of vestibular ecomorphology in birds, Journal of Anatomy), the collection of which was funded by Natural Environment Research Council (NERC) grants NE/H012176/1 and NE/E008380/1. The files were downloaded from www.MorphoSource.org, Duke University.	http://www.morphosource.org/Detail/MediaDetail/Show/media_id/17406	M17406-32663	Surface mesh of bony labyrinth
Columba	palumbus	CEB 130137	Skyscan1173	0.00788575	0.00788575	0.00788575	130	61	Cadaver sampled in the wild.	-	-	Micro-CT scan
Cuculus	canorus	NMS unvouchered	Nikon XT H 225ST	0.0564185	0.0564185	0.0564185	-	-	National Museums of Scotland, Edinburgh provided access to these data originally appearing in Benson et al (2017: Comparative analysis of vestibular ecomorphology in birds, Journal of Anatomy),, the collection of which was funded by Natural Environment Research Council (NERC) grants NE/H012176/1 and NE/E008380/1.. The files were downloaded from www.MorphoSource.org, Duke University.	http://www.morphosource.org/Detail/MediaDetail/Show/media_id/17715	M17715-33449	Surface mesh of bony labyrinth
Grus	grus	MNHN unvouchered	X8060 NDT	0.143	0.143	0.143	50	1500	-	-	-	Micro-CT scan
Spheniscus	demersus	UF 21341	Metris X-Tek HMX ST CT	0.119	0.119	0.119	-	-	-	-	-	Micro-CT scan
Pelagodroma	marina	NMS Z.1898.30	Nikon XT H 225ST	0.036203	0.036203	0.036203	-	-	National Museums of Scotland, Edinburgh provided access to these data originally appearing in Benson et al (2017: Comparative analysis of vestibular ecomorphology in birds, Journal of Anatomy), the collection of which was funded by Natural Environment Research Council (NERC) grants NE/H012176/1 and NE/E008380/1. The files were downloaded from www.MorphoSource.org, Duke University.	http://www.morphosource.org/Detail/MediaDetail/Show/media_id/17409	M17409-32678	Surface mesh of bony labyrinth
Diomedea	exulans	NMS Z.1921.143.1630	Nikon XT H 225ST	0.0727764	0.0727764	0.0727764	-	-	National Museums of Scotland, Edinburgh provided access to these data originally appearing in Benson et al (2017: Comparative analysis of vestibular ecomorphology in birds, Journal of Anatomy), the collection of which was funded by Natural Environment Research Council (NERC) grants NE/H012176/1 and NE/E008380/1. The files were downloaded from www.MorphoSource.org, Duke University.	http://www.morphosource.org/Detail/MediaDetail/Show/media_id/17411	M17411-32688	Surface mesh of bony labyrinth
Fulmarus	glacialis	NMS Z.2003.181.2	Nikon XT H 225ST	0.0745648	0.0745648	0.0745648	-	-	National Museums of Scotland, Edinburgh provided access to these data originally appearing in Benson et al (2017: Comparative analysis of vestibular ecomorphology in birds, Journal of Anatomy), the collection of which was funded by Natural Environment Research Council (NERC) grants NE/H012176/1 and NE/E008380/1. The files were downloaded from www.MorphoSource.org, Duke University.	http://www.morphosource.org/Detail/MediaDetail/Show/media_id/17426	M17426-32763	Surface mesh of bony labyrinth
Gavia	immer	NMS unvouchered	Nikon XT H 225ST	0.0801141	0.0801141	0.0801141	-	-	National Museums of Scotland, Edinburgh provided access to these data originally appearing in Benson et al (2017: Comparative analysis of vestibular ecomorphology in birds, Journal of Anatomy), the collection of which was funded by Natural Environment Research Council (NERC) grants NE/H012176/1 and NE/E008380/1. The files were downloaded from www.MorphoSource.org, Duke University.	http://www.morphosource.org/Detail/MediaDetail/Show/media_id/17717	M17717-33459	Surface mesh of bony labyrinth
Ardea	cinerea	NMS Z.2002.64	Nikon XT H 225ST	0.0880536	0.0880536	0.0880536	-	-	National Museums of Scotland, Edinburgh provided access to these data originally appearing in Benson et al (2017: Comparative analysis of vestibular ecomorphology in birds, Journal of Anatomy), the collection of which was funded by Natural Environment Research Council (NERC) grants NE/H012176/1 and NE/E008380/1. The files were downloaded from www.MorphoSource.org, Duke University.	http://www.morphosource.org/Detail/MediaDetail/Show/media_id/17425	M17425-32758	Surface mesh of bony labyrinth
Phalacrocorax	harrisi	NHMUK S/1973.1.10	Nikon XT H 225ST	0.0501	0.0501	0.0501	-	-	Natural History Museum, London provided access to these data originally appearing in Benson et al (2017: Comparative analysis of vestibular ecomorphology in birds, Journal of Anatomy), the collection of which was funded by Natural Environment Research Council (NERC) grants NE/H012176/1 and NE/E008380/1. The files were downloaded from www.MorphoSource.org, Duke University.	http://www.morphosource.org/Detail/MediaDetail/Show/media_id/17401	M17401-32638	Surface mesh of bony labyrinth
Fregata	magnificens	NMS Z.2000.111.2	Nikon XT H 225ST	0.0406241	0.0406241	0.0406241	-	-	National Museums of Scotland, Edinburgh provided access to these data originally appearing in Benson et al (2017: Comparative analysis of vestibular ecomorphology in birds, Journal of Anatomy), the collection of which was funded by Natural Environment Research Council (NERC) grants NE/H012176/1 and NE/E008380/1. The files were downloaded from www.MorphoSource.org, Duke University.	http://www.morphosource.org/Detail/MediaDetail/Show/media_id/17421	M17421-32738	Surface mesh of bony labyrinth
Phaethon	lepturus	NHMUK S/1884.2.29.10	Nikon XT H 225ST	0.0371	0.0371	0.0371	-	-	Natural History Museum, London provided access to these data originally appearing in Benson et al (2017: Comparative analysis of vestibular ecomorphology in birds, Journal of Anatomy), the collection of which was funded by Natural Environment Research Council (NERC) grants NE/H012176/1 and NE/E008380/1. The files were downloaded from www.MorphoSource.org, Duke University.	http://www.morphosource.org/Detail/MediaDetail/Show/media_id/17400	M17400-32633	Surface mesh of bony labyrinth
Balaeniceps	rex	NMS unvouchered	Nikon XT H 225ST	0.0674	0.0674	0.0674	-	-	National Museums of Scotland, Edinburgh provided access to these data originally appearing in Benson et al (2017: Comparative analysis of vestibular ecomorphology in birds, Journal of Anatomy), the collection of which was funded by Natural Environment Research Council (NERC) grants NE/H012176/1 and NE/E008380/1. The files were downloaded from www.MorphoSource.org, Duke University.	http://www.morphosource.org/Detail/MediaDetail/Show/media_id/17712	M17712-33434	Surface mesh of bony labyrinth
Ciconia	ciconia	NHMUK 1859.9.6.393	Metris X-Tek HMX ST CT	0.043	0.043	0.043	-	-	-	-	-	Micro-CT scan
Ciconia	nigra	NHMUK S/1952.1.103	Metris X-Tek HMX ST CT	0.04	0.04	0.04	-	-	-	-	-	Micro-CT scan
Phoenicopterus	ruber	NMS Z.2000.193.1	Nikon XT H 225ST	0.0406241	0.0406241	0.0406241	-	-	National Museums of Scotland, Edinburgh provided access to these data originally appearing in Benson et al (2017: Comparative analysis of vestibular ecomorphology in birds, Journal of Anatomy), the collection of which was funded by Natural Environment Research Council (NERC) grants NE/H012176/1 and NE/E008380/1. The files were downloaded from www.MorphoSource.org, Duke University.	http://www.morphosource.org/Detail/MediaDetail/Show/media_id/17422	M17422-32743	Surface mesh of bony labyrinth
Podiceps	cristatus	NMS Z.1990.74	Nikon XT H 225ST	0.0745648	0.0745648	0.0745648	-	-	National Museums of Scotland, Edinburgh provided access to these data originally appearing in Benson et al (2017: Comparative analysis of vestibular ecomorphology in birds, Journal of Anatomy), the collection of which was funded by Natural Environment Research Council (NERC) grants NE/H012176/1 and NE/E008380/1. The files were downloaded from www.MorphoSource.org, Duke University.	http://www.morphosource.org/Detail/MediaDetail/Show/media_id/17415	M17415-32708	Surface mesh of bony labyrinth
Haematopus	ostralegus	NMS Z.1998.7.3	Nikon XT H 225ST	0.0630749	0.0630749	0.0630749	-	-	National Museums of Scotland, Edinburgh provided access to these data originally appearing in Benson et al (2017: Comparative analysis of vestibular ecomorphology in birds, Journal of Anatomy), the collection of which was funded by Natural Environment Research Council (NERC) grants NE/H012176/1 and NE/E008380/1. The files were downloaded from www.MorphoSource.org, Duke University.	http://www.morphosource.org/Detail/MediaDetail/Show/media_id/17420	M17420-32733	Surface mesh of bony labyrinth
Scolopax	rusticola	NMS Z.1939.30.6	Nikon XT H 225ST	0.0745648	0.0745648	0.0745648	-	-	National Museums of Scotland, Edinburgh provided access to these data originally appearing in Benson et al (2017: Comparative analysis of vestibular ecomorphology in birds, Journal of Anatomy), the collection of which was funded by Natural Environment Research Council (NERC) grants NE/H012176/1 and NE/E008380/1. The files were downloaded from www.MorphoSource.org, Duke University.	http://www.morphosource.org/Detail/MediaDetail/Show/media_id/17414	M17414-32703	Surface mesh of bony labyrinth
Actitis	hypoleucos	NMS Z.1931.43	Nikon XT H 225ST	0.0378707	0.0378707	0.0378707	-	-	National Museums of Scotland, Edinburgh provided access to these data originally appearing in Benson et al (2017: Comparative analysis of vestibular ecomorphology in birds, Journal of Anatomy), the collection of which was funded by Natural Environment Research Council (NERC) grants NE/H012176/1 and NE/E008380/1. The files were downloaded from www.MorphoSource.org, Duke University.	http://www.morphosource.org/Detail/MediaDetail/Show/media_id/17320	M17320-32453	Surface mesh of bony labyrinth
Alca	torda	NMS Z.2000.08.105	Nikon XT H 225ST	0.0688344	0.0688344	0.0688344	-	-	National Museums of Scotland, Edinburgh provided access to these data originally appearing in Benson et al (2017: Comparative analysis of vestibular ecomorphology in birds, Journal of Anatomy), the collection of which was funded by Natural Environment Research Council (NERC) grants NE/H012176/1 and NE/E008380/1. The files were downloaded from www.MorphoSource.org, Duke University.	http://www.morphosource.org/Detail/MediaDetail/Show/media_id/17321	M17321-32458	Surface mesh of bony labyrinth
Gelochelidon	nilotica	NMS unvouchered	Nikon XT H 225ST	0.0630749	0.0630749	0.0630749	-	-	National Museums of Scotland, Edinburgh provided access to these data originally appearing in Benson et al (2017: Comparative analysis of vestibular ecomorphology in birds, Journal of Anatomy), the collection of which was funded by Natural Environment Research Council (NERC) grants NE/H012176/1 and NE/E008380/1. The files were downloaded from www.MorphoSource.org, Duke University.	http://www.morphosource.org/Detail/MediaDetail/Show/media_id/17718	M17718-33464	Surface mesh of bony labyrinth
Creagrus	furcatus	NHMUK S/1967.19.6	Nikon XT H 225ST	0.0431	0.0431	0.0431	-	-	Natural History Museum, London provided access to these data originally appearing in Benson et al (2017: Comparative analysis of vestibular ecomorphology in birds, Journal of Anatomy), the collection of which was funded by Natural Environment Research Council (NERC) grants NE/H012176/1 and NE/E008380/1. The files were downloaded from www.MorphoSource.org, Duke University.	http://www.morphosource.org/Detail/MediaDetail/Show/media_id/17397	M17397-32618	Surface mesh of bony labyrinth
Larus	argentatus	NMS unvouchered	Nikon XT H 225ST	0.084651	0.084651	0.084651	-	-	National Museums of Scotland, Edinburgh provided access to these data originally appearing in Benson et al (2017: Comparative analysis of vestibular ecomorphology in birds, Journal of Anatomy), the collection of which was funded by Natural Environment Research Council (NERC) grants NE/H012176/1 and NE/E008380/1. The files were downloaded from www.MorphoSource.org, Duke University.	http://www.morphosource.org/Detail/MediaDetail/Show/media_id/17719	M17719-33469	Surface mesh of bony labyrinth
Opisthocomus	hoazin	NHMUK S/1892.7.11.1	Nikon XT H 225ST	0.0318	0.0318	0.0318	-	-	Natural History Museum, London provided access to these data originally appearing in Benson et al (2017: Comparative analysis of vestibular ecomorphology in birds, Journal of Anatomy), the collection of which was funded by Natural Environment Research Council (NERC) grants NE/H012176/1 and NE/E008380/1. The files were downloaded from www.MorphoSource.org, Duke University.	http://www.morphosource.org/Detail/MediaDetail/Show/media_id/17399	M17399-32628	Surface mesh of bony labyrinth
Athene	cunicularia	NHMUK S/1986.75.13	Metris X-Tek HMX ST CT	0.0361	0.0361	0.0361	-	-	-	-	-	Micro-CT scan
Tyto	alba	NHMUK S/1981.39.1	Metris X-Tek HMX ST CT	0.0392	0.0392	0.0392	-	-	-	-	-	Micro-CT scan
Alcedo	atthis	NMS unvouchered	Nikon XT H 225ST	0.0316176	0.0316176	0.0316176	-	-	National Museums of Scotland, Edinburgh provided access to these data originally appearing in Benson et al (2017: Comparative analysis of vestibular ecomorphology in birds, Journal of Anatomy), the collection of which was funded by Natural Environment Research Council (NERC) grants NE/H012176/1 and NE/E008380/1. The files were downloaded from www.MorphoSource.org, Duke University.	http://www.morphosource.org/Detail/MediaDetail/Show/media_id/17711	M17711-33429	Surface mesh of bony labyrinth
Coracias	garrulus	NMS Z.1994.44	Nikon XT H 225ST	0.0439943	0.0439943	0.0439943	-	-	National Museums of Scotland, Edinburgh provided access to these data originally appearing in Benson et al (2017: Comparative analysis of vestibular ecomorphology in birds, Journal of Anatomy), the collection of which was funded by Natural Environment Research Council (NERC) grants NE/H012176/1 and NE/E008380/1. The files were downloaded from www.MorphoSource.org, Duke University.	http://www.morphosource.org/Detail/MediaDetail/Show/media_id/17416	M17416-32713	Surface mesh of bony labyrinth
Ramphastos	dicolorus	NMS Z.1931.43_Rhamphastos	Nikon XT H 225ST	0.084651	0.084651	0.084651	-	-	National Museums of Scotland, Edinburgh provided access to these data originally appearing in Benson et al (2017: Comparative analysis of vestibular ecomorphology in birds, Journal of Anatomy), the collection of which was funded by Natural Environment Research Council (NERC) grants NE/H012176/1 and NE/E008380/1. The files were downloaded from www.MorphoSource.org, Duke University.	http://www.morphosource.org/Detail/MediaDetail/Show/media_id/17726	M17726-33504	Surface mesh of bony labyrinth
Pteroglossus	bailloni	MNHN unvouchered	X8060 NDT	0.1	0.1	0.1	100	100	-	-	-	Micro-CT scan
Dendrocopos	medius	CEB 140034	Skyscan1173	0.00788575	0.00788575	0.00788575	130	61	Cadaver sampled in the wild.	-	-	Micro-CT scan
Sagittarius	serpentarius	NMS Z.1931.120.7	Nikon XT H 225ST	0.0579965	0.0579965	0.0579965	-	-	National Museums of Scotland, Edinburgh provided access to these data originally appearing in Benson et al (2017: Comparative analysis of vestibular ecomorphology in birds, Journal of Anatomy), the collection of which was funded by Natural Environment Research Council (NERC) grants NE/H012176/1 and NE/E008380/1. The files were downloaded from www.MorphoSource.org, Duke University.	http://www.morphosource.org/Detail/MediaDetail/Show/media_id/17412	M17412-32693	Surface mesh of bony labyrinth
Pandion	haliaetus	NMS Z.1995.35	Nikon XT H 225ST	0.0688344	0.0688344	0.0688344	-	-	National Museums of Scotland, Edinburgh provided access to these data originally appearing in Benson et al (2017: Comparative analysis of vestibular ecomorphology in birds, Journal of Anatomy), the collection of which was funded by Natural Environment Research Council (NERC) grants NE/H012176/1 and NE/E008380/1. The files were downloaded from www.MorphoSource.org, Duke University.	http://www.morphosource.org/Detail/MediaDetail/Show/media_id/17418	M17418-32723	Surface mesh of bony labyrinth
Circus	cyaneus	NMS Z.1995.188	Nikon XT H 225ST	0.0554408	0.0554408	0.0554408	-	-	National Museums of Scotland, Edinburgh provided access to these data originally appearing in Benson et al (2017: Comparative analysis of vestibular ecomorphology in birds, Journal of Anatomy), the collection of which was funded by Natural Environment Research Council (NERC) grants NE/H012176/1 and NE/E008380/1. The files were downloaded from www.MorphoSource.org, Duke University.	http://www.morphosource.org/Detail/MediaDetail/Show/media_id/17417	M17417-32718	Surface mesh of bony labyrinth
Aquila	chrysaetos	NMS Z.1997.29	Nikon XT H 225ST	0.0548426	0.0548426	0.0548426	-	-	National Museums of Scotland, Edinburgh provided access to these data originally appearing in Benson et al (2017: Comparative analysis of vestibular ecomorphology in birds, Journal of Anatomy), the collection of which was funded by Natural Environment Research Council (NERC) grants NE/H012176/1 and NE/E008380/1. The files were downloaded from www.MorphoSource.org, Duke University.	http://www.morphosource.org/Detail/MediaDetail/Show/media_id/17419	M17419-32728	Surface mesh of bony labyrinth
Buteo	buteo	NHMUK S/2007.139.12	Metris X-Tek HMX ST CT	0.04	0.04	0.04	-	-	-	-	-	Micro-CT scan
Vultur	gryphus	NMS Z.1879.8.38	Nikon XT H 225ST	0.0756301	0.0756301	0.0756301	-	-	National Museums of Scotland, Edinburgh provided access to these data originally appearing in Benson et al (2017: Comparative analysis of vestibular ecomorphology in birds, Journal of Anatomy), the collection of which was funded by Natural Environment Research Council (NERC) grants NE/H012176/1 and NE/E008380/1. The files were downloaded from www.MorphoSource.org, Duke University.	http://www.morphosource.org/Detail/MediaDetail/Show/media_id/17407	M17407-32668	Surface mesh of bony labyrinth
Falco	subbuteo	CEB 140011	Skyscan1173	0.00788575	0.00788575	0.00788575	130	61	Specimen was prepared as described in David et al. 2016 before scanning. Obtained from Leipzig University, Veterinary clinic for birds and reptiles	-	-	Micro-CT scan
Melopsittacus	undulatus	CEB 140012	Skyscan1173	0.00788575	0.00788575	0.00788575	130	61	Specimen was prepared as described in David et al. 2016 before scanning. Obtained from Leipzig University, Veterinary clinic for birds and reptiles	-	-	Micro-CT scan
Ara	macao	NMS Z.1931.43_Ara	Nikon XT H 225ST	0.0651423	0.0651423	0.0651423	-	-	National Museums of Scotland, Edinburgh provided access to these data originally appearing in Benson et al (2017: Comparative analysis of vestibular ecomorphology in birds, Journal of Anatomy), the collection of which was funded by Natural Environment Research Council (NERC) grants NE/H012176/1 and NE/E008380/1. The files were downloaded from www.MorphoSource.org, Duke University.	http://www.morphosource.org/Detail/MediaDetail/Show/media_id/17722	M17722-33484	Surface mesh of bony labyrinth
Psittacus	erithacus	NHMUK S/1973.66.109	Metris X-Tek HMX ST CT	0.0361	0.0361	0.0361	-	-	-	-	-	Micro-CT scan
Dicrurus	paradiseus	NHMUK S/1969.1.163	Nikon XT H 225ST	0.0373	0.0373	0.0373	-	-	Natural History Museum, London provided access to these data originally appearing in Benson et al (2017: Comparative analysis of vestibular ecomorphology in birds, Journal of Anatomy), the collection of which was funded by Natural Environment Research Council (NERC) grants NE/H012176/1 and NE/E008380/1. The files were downloaded from www.MorphoSource.org, Duke University.	http://www.morphosource.org/Detail/MediaDetail/Show/media_id/17390	M17390-32583	Surface mesh of bony labyrinth
Corvus	corax	NHMUK S/1979.66.160	Metris X-Tek HMX ST CT	0.043	0.043	0.043	-	-	-	-	-	Micro-CT scan
Taeniopygia	guttata	NHMUK S/2002.46.1	Metris X-Tek HMX ST CT	0.0373	0.0373	0.0373	-	-	-	-	-	Micro-CT scan
Passer	domesticus	CEB 130050	Skyscan1173	0.0111111	0.0111111	0.0111111	100	62	Specimen was prepared as described in David et al. 2016 before scanning. Cadaver sampled in the wild.	-	-	Micro-CT scan
Carduelis	chloris	CEB 130130	Skyscan1173	0.00860141	0.00860141	0.00860141	130	61	Specimen was prepared as described in David et al. 2016 before scanning. Cadaver sampled in the wild.	-	-	Micro-CT scan
Bangsia	arcaei	MNHN unvouchered	X8060 NDT	0.033	0.033	0.033	60	500	-	-	-	Micro-CT scan
Hirundo	rustica	CEB 140010	Skyscan1173	0.00788575	0.00788575	0.00788575	130	61	Cadaver sampled in the wild.	-	-	Micro-CT scan
Regulus	regulus	NHM Unregistered Palaeontology Comparative Collection (6)9	Metris X-Tek HMX ST CT	0.014	0.014	0.014	-	-	-	-	-	Micro-CT scan
Luscinia	megarhynchos	NHMUK S/1968.4.14	Nikon XT H 225ST	0.0373	0.0373	0.0373	-	-	Natural History Museum, London provided access to these data originally appearing in Benson et al (2017: Comparative analysis of vestibular ecomorphology in birds, Journal of Anatomy), the collection of which was funded by Natural Environment Research Council (NERC) grants NE/H012176/1 and NE/E008380/1. The files were downloaded from www.MorphoSource.org, Duke University.	http://www.morphosource.org/Detail/MediaDetail/Show/media_id/17391	M17391-32588	Surface mesh of bony labyrinth
Turdus	merula	CEB 130075	Skyscan1173	0.0109294	0.0109294	0.0109294	100	80	Specimen was prepared as described in David et al. 2016 before scanning. Cadaver sampled in the wild.	-	-	Micro-CT scan
Sphenodon	punctatus	YPM 9194	custom-built Bio-Imaging Research, Inc. (BIR) scanner that used a conventional medical image-intensifier detector	0.225	0.225	0.225	120	267	-	-	-	Micro-CT scan
Sphenodon	punctatus	LDUCZ x036	University of Texas High-Resolution X-ray CT Facility	0.058	0.058	0.058	120	267	-	-	-	Micro-CT scan
Delma	borea	USNM 128679	University of Texas High-Resolution X-ray CT Facility	0.01364	0.01364	0.01364	180	133	-	-	-	Micro-CT scan
Nephrurus	levis	YPM 12868	custom-built Bio-Imaging Research, Inc. (BIR) scanner that used a conventional medical image-intensifier detector	0.0417	0.0417	0.0417	-	-	-	-	-	Micro-CT scan
Hemitheconyx	caudicinctus	YPM 14381	custom-built Bio-Imaging Research, Inc. (BIR) scanner that used a conventional medical image-intensifier detector	0.0599	0.0599	0.0599	-	-	-	-	-	Micro-CT scan
Eublepharis	macularius	CMNH 67524	University of Texas High-Resolution X-ray CT Facility	0.04426	0.04426	0.04426	180	133	-	-	-	Micro-CT scan
Teratoscincus	przewalskii	CAS 171013	University of Texas High-Resolution X-ray CT Facility	0.04825	0.04825	0.04825	225	100	-	-	-	Micro-CT scan
Ptyodactylus	hasselquistii	NHMUK 1900.9.22.15	Metris X-Tek HMX ST CT	0.0267	0.0267	0.0267	-	-	-	-	-	Micro-CT scan
Gekko	gecko	FMNH 186818	University of Texas High-Resolution X-ray CT Facility	0.114	0.114	0.114	180	133	-	-	-	Micro-CT scan
Gymnodactylus	geckoides	NHMUK 1978.346	Metris X-Tek HMX ST CT	0.0203	0.0203	0.0203	-	-	-	-	-	Micro-CT scan
Smaug	warreni mossambicus	YPM 12670	University of Texas High-Resolution X-ray CT Facility	0.057	0.057	0.057	180	133	-	-	-	Micro-CT scan
Lepidophyma	smithii	LACM 136359	University of Texas High-Resolution X-ray CT Facility	0.0352	0.0352	0.0418	180	133	-	-	-	Micro-CT scan
Cricosaura	typica	USNM 547842	University of Texas High-Resolution X-ray CT Facility	0.0152	0.0152	0.0152	120	200	-	-	-	Micro-CT scan
Tribolonotus	gracilis	NHMUK 1938.5.7.59	Metris X-Tek HMX ST CT	0.0288	0.0288	0.0288	-	-	-	-	-	Micro-CT scan
Tiliqua	rugosa	NHMUK 29a	Metris X-Tek HMX ST CT	0.0461	0.0461	0.0461	-	-	-	-	-	Micro-CT scan
Eumeces	schneideri	YPM 12668	custom-built Bio-Imaging Research, Inc. (BIR) scanner that used a conventional medical image-intensifier detector	0.0532	0.0532	0.0532	-	-	-	-	-	Micro-CT scan
Feylinia	polylepis	FMNH 120968	University of Texas High-Resolution X-ray CT Facility	0.01877	0.01877	0.01877	180	133	-	-	-	Micro-CT scan
Chalcides	ocellatus	YPM 12690	custom-built Bio-Imaging Research, Inc. (BIR) scanner that used a conventional medical image-intensifier detector	0.0409	0.0409	0.0409	-	-	-	-	-	Micro-CT scan
Tupinambis	teguixin	FMNH 22416	University of Texas High-Resolution X-ray CT Facility	0.1485	0.1485	0.1485	120	200	-	-	-	Micro-CT scan
Salvator	merianae	FMNH 10694	GE v|tome|x s 240	0.035	0.035	0.035	120	250	-	-	-	Micro-CT scan
Diplometopon	zarudnyi	FMNH 64429	custom-built Bio-Imaging Research, Inc. (BIR) scanner that used a conventional medical image-intensifier detector	0.0192	0.0192	0.0192	180	133	-	-	-	Micro-CT scan
Bipes	biporus	CAS 126478	University of Texas High-Resolution X-ray CT Facility	0.073	0.073	0.073	180	133	-	-	-	Micro-CT scan
Lacerta	viridis	YPM 12858	University of Texas High-Resolution X-ray CT Facility	0.0434	0.0434	0.0434	120	200	-	-	-	Micro-CT scan
Podarcis	wagleriana	CEB 130040	Skyscan1172	0.00446318	0.00446318	0.00446318	100	100	Specimen was prepared as described in David et al. 2016 before scanning. Cadaver sampled in the wild.	-	-	Micro-CT scan
Podarcis	siculus	NHMUK 1978.1441	Metris X-Tek HMX ST CT	0.0229	0.0229	0.0229	-	-	-	-	-	Micro-CT scan
Typhlops	jamaicensis	USNM 12378	University of Texas High-Resolution X-ray CT Facility	0.0157	0.0157	0.0157	180	133	-	-	-	Micro-CT scan
Tropidophis	haetianus	TNHC 64040	University of Texas High-Resolution X-ray CT Facility	0.03021	0.03021	0.03021	180	133	-	-	-	Micro-CT scan
Boa	constrictor	CEB 130166	SkyScan1173	0.00788575	0.00788575	0.00788575	130	61	Specimen was prepared as described in David et al. 2016 before scanning. Obtained from Leipzig University, Veterinary clinic for birds and reptiles	-	-	Micro-CT scan
Uropeltis	melanogaster	FMNH 167048	University of Texas High-Resolution X-ray CT Facility	0.0152	0.0152	0.0152	180	133	-	-	-	Micro-CT scan
Anomochilus	leonardi	FRIM0026	custom-built Bio-Imaging Research, Inc. (BIR) scanner that used a conventional medical image-intensifier detector	0.0144	0.0144	0.0144	180	88	-	-	-	Micro-CT scan
Cylindrophis	ruffus	FMNH 60958	University of Texas High-Resolution X-ray CT Facility	0.05118	0.05118	0.05118	180	133	-	-	-	Micro-CT scan
Casarea	dussumieri	UMMZ 190285	University of Texas High-Resolution X-ray CT Facility	0.0179	0.0179	0.0179	180	133	-	-	-	Micro-CT scan
Xenopeltis	unicolor	FMNH 148900	University of Texas High-Resolution X-ray CT Facility	0.05234	0.05234	0.05234	180	133	-	-	-	Micro-CT scan
Morelia	spilota	FMNH 218598	GE v|tome|x s 240	0.022	0.022	0.022	120	160	-	-	-	Micro-CT scan
Python	molurus	TNHC 62769	University of Texas High-Resolution X-ray CT Facility	0.1055	0.1055	0.1055	120	200	-	-	-	Micro-CT scan
Acrochordus	granulatus	FMNH 201350	University of Texas High-Resolution X-ray CT Facility	0.0482	0.0482	0.0482	180	133	-	-	-	Micro-CT scan
Xenodermus	javanicus	FMNH 158613	University of Texas High-Resolution X-ray CT Facility	0.02529	0.02529	0.02529	180	133	-	-	-	Micro-CT scan
Cerastes	cornutus	NHMUK 1930.5.8.952	Metris X-Tek HMX ST CT	0.0267	0.0267	0.0267	-	-	-	-	-	Micro-CT scan
Ahaetulla	nasuta	NHMUK 1930.5.8.725	Metris X-Tek HMX ST CT	0.0271	0.0271	0.0271	-	-	-	-	-	Micro-CT scan
Chrysopelea	paradisi	FMNH 71626	University of Texas High-Resolution X-ray CT Facility	0.03822	0.03822	0.03822	210	110	-	-	-	Micro-CT scan
Aparallactus	werneri	FMNH 250439	University of Texas High-Resolution X-ray CT Facility	0.016816	0.016816	0.016816	180	133	-	-	-	Micro-CT scan
Naja	naja	NHMUK 59.9.21.2	Metris X-Tek HMX ST CT	0.0343	0.0343	0.0343	-	-	-	-	-	Micro-CT scan
Laticauda	colubrina	FMNH 202810	University of Texas High-Resolution X-ray CT Facility	0.063	0.063	0.063	180	133	-	-	-	Micro-CT scan
Heloderma	horridum	TNHC 64380	University of Texas High-Resolution X-ray CT Facility	0.1147	0.1147	0.1147	180	133	-	-	-	Micro-CT scan
Heloderma	suspectum	TNHC 62766	custom-built Bio-Imaging Research, Inc. (BIR) scanner that used a conventional medical image-intensifier detector	0.133	0.133	0.133	-	-	-	-	-	Micro-CT scan
Ophisaurus	apodus	YPM 12870	University of Texas High-Resolution X-ray CT Facility	0.0633	0.0633	0.0633	120	190	-	-	-	Micro-CT scan
Gerrhonotus	infernalis	YPM 14379	custom-built Bio-Imaging Research, Inc. (BIR) scanner that used a conventional medical image-intensifier detector	0.043	0.043	0.043	120	200	-	-	-	Micro-CT scan
Elgaria	coerulea	NHMUK 1964.1829	Metris X-Tek HMX ST CT	0.0184	0.0184	0.0184	-	-	-	-	-	Micro-CT scan
Lanthanotus	borneensis	YPM 6057	custom-built Bio-Imaging Research, Inc. (BIR) scanner that used a conventional medical image-intensifier detector	0.09	0.09	0.09	-	-	-	-	-	Micro-CT scan
Lanthanotus	borneensis	FMNH 148589	University of Texas High-Resolution X-ray CT Facility	0.04637	0.04637	0.04637	180	133	-	-	-	Micro-CT scan
Varanus	niloticus	UCMZ R.9586	Metris X-Tek HMX ST CT	0.0851	0.0851	0.0851	-	-	-	-	-	Micro-CT scan
Varanus	exanthematicus	NHMUK 1932.6.1.12	Metris X-Tek HMX ST CT	0.042	0.042	0.042	-	-	-	-	-	Micro-CT scan
Varanus	salvator	FMNH 35144	University of Texas High-Resolution X-ray CT Facility	0.201	0.201	0.201	180	133	-	-	-	Micro-CT scan
Varanus	jobiensis	CEB 130032	SkyScan1173	0.00788575	0.00788575	0.00788575	130	61	Specimen was prepared as described in David et al. 2016 before scanning. Obtained from Leipzig University, Institut of Veterinary Pathology	-	-	Micro-CT scan
Varanus	giganteus	NHMUK 97.5.31.1	Metris X-Tek HMX ST CT	0.062	0.062	0.062	-	-	-	-	-	Micro-CT scan
Chamaeleo	senegalensis laevigatus	FMNH 47572	University of Texas High-Resolution X-ray CT Facility	0.036	0.036	0.036	180	133	-	-	-	Micro-CT scan
Brookesia	brygooi	FMNH 260015	University of Texas High-Resolution X-ray CT Facility	0.0428447	0.0428447	0.0428447	180	110	-	-	-	Micro-CT scan
Draco	quinquefasciatus	FMNH 221322	University of Texas High-Resolution X-ray CT Facility	0.03755	0.03755	0.03755	210	110	-	-	-	Micro-CT scan
Uromastyx	hardwickii	UCA.5	custom-built Bio-Imaging Research, Inc. (BIR) scanner that used a conventional medical image-intensifier detector	0.0588	0.0588	0.0588	120	200	-	-	-	Micro-CT scan
Saara	aegyptia	FMNH 78661	University of Texas High-Resolution X-ray CT Facility	0.1227	0.1227	0.1227	180	133	-	-	-	Micro-CT scan
Sceloporus	variabilis	FMNH 122866	University of Texas High-Resolution X-ray CT Facility	0.0391	0.0391	0.0391	180	133	-	-	-	Micro-CT scan
Leiocephalus	barahonensis	USNM 260564	University of Texas High-Resolution X-ray CT Facility	0.03786	0.03786	0.03786	180	133	-	-	-	Micro-CT scan
Morunasaurus	annularis	USNM 200767	University of Texas High-Resolution X-ray CT Facility	0.07572	0.07572	0.07572	180	133	-	-	-	Micro-CT scan
Gambelia	wislizenii	NHMUK 1792.568	Metris X-Tek HMX ST CT	0.0272	0.0272	0.0272	-	-	-	-	-	Micro-CT scan
Basiliscus	basiliscus barbouri	FMNH 165622	University of Texas High-Resolution X-ray CT Facility	0.073	0.073	0.073	180	133	-	-	-	Micro-CT scan
Liolaemus	chilensis	NHMUK 1970.1.20.135	Metris X-Tek HMX ST CT	0.0233	0.0233	0.0233	-	-	-	-	-	Micro-CT scan
Liolaemus	bellii	MVZ 125659	University of Texas High-Resolution X-ray CT Facility	0.02837	0.02837	0.02837	180	133	-	-	-	Micro-CT scan
Anolis	sagrei	NHMUK 1964.179	Metris X-Tek HMX ST CT	0.0267	0.0267	0.0267	-	-	-	-	-	Micro-CT scan
Anolis	grahami	NHMUK 1964.1782	Metris X-Tek HMX ST CT	0.0267	0.0267	0.0267	-	-	-	-	-	Micro-CT scan
Eothyris	parkeri	MCZ 1161	ACTIS scanner	0.054	0.054	0.054	200	170	-	-	-	Micro-CT scan
Dimetrodon	sp.	FMNH PR 4976 (probably MCZ9560)	N/A	NA	NA	NA	NA	NA	-	-	-	Photogrammetric reconstuction	This specimen is a wax model made from a serially-sectioned specimen. The digital model was made using photogrammetry.
Hipposaurus	boonstrai	CG WB123	ESRF	0.108	0.108	0.108	130	NA	-	-	-	Micro-CT scan
Lemurosaurus	pricei	BP/1/816	Nikon Metrology XTH 225/320 LC	0.05	0.05	0.05	110	150	-	-	-	Micro-CT scan
Lemurosaurus	pricei	NMQR 1702	ESRF	0.0538	0.0538	0.0538	130	NA	-	-	-	Micro-CT scan
Leucocephalus	wewersi	SAM-PK-K11112	ESRF	0.0538	0.0538	0.0538	130	-	-	-	-	Micro-CT scan
Herpetoskylax	hopsoni	BP/1/3924	Nikon Metrology XTH 225/320 LC	0.0689	0.0689	0.0689	130	150	-	-	-	Micro-CT scan
Moschops	capensis	AM 6556	ESRF	0.234	0.234	0.234	150	NA	-	-	-	Micro-CT scan
Patranomodon	nyaphulii	NMQR 3000	Nikon Metrology XTH 225/320 LC	0.0356	0.0356	0.0356	70	80	-	-	-	Micro-CT scan
Eodicynodon	oosthuizeni	NMQR 2978	Nikon Metrology XTH 225/320 LC	0.0739	0.0739	0.0739	125	135	-	-	-	Micro-CT scan
Diictodon	feliceps	GPIT/RE/9275	ESRF	0.04657	0.04657	0.04657	100	-	-	-	-	Micro-CT scan
Pristerodon	mackayi	NHCC LB355	Nikon Metrology XTH 225/320 LC	0.061	0.061	0.061	-	-	-	-	-	Micro-CT scan
Niassodon	mfumukasi	ML1620	ESRF	0.02785	0.02785	0.02785	97.8	-	-	-	-	Micro-CT scan
Endothiodon	bathystoma	MTA/ACL001	ESRF	0.04598	0.04598	0.04598	130	-	-	-	-	Micro-CT scan
Endothiodon	bathystoma	MTA/ACL002	ESRF	0.04598	0.04598	0.04598	130	-	-	-	-	Micro-CT scan
Endothiodon	bathystoma	MTA/ACL003	ESRF	0.04598	0.04598	0.04598	130	-	-	-	-	Micro-CT scan
Endothiodon	tolani	NMT RB162	GE v|tome|x s 240	0.06043	0.06043	0.06043	190	200	-	-	-	Micro-CT scan
Abajudon	kaayai	NHCC LB314	GE v|tome|x s 240	0.08	0.08	0.08	120	660	-	-	-	Micro-CT scan
Dicynodontoides	cf. recurvidens	NHCC LB117	GE v|tome|x s 240	0.06887	0.06887	0.06887	210	210	-	-	-	Micro-CT scan
Kembawacela	kitchingi	NHCC LB18	GE v|tome|x s 240	0.047	0.047	0.047	120	380	-	-	-	Micro-CT scan
Kawingasaurus	fossilis	GPIT/RE/9272	ESRF	0.02652	0.02652	0.02652	NA	NA	-	-	-	Micro-CT scan
Oudenodon	bainii	NHCC LB631	GE v|tome|x s 240	0.08704	0.08704	0.08704	220	260	-	-	-	Micro-CT scan
Aulacephalodon	sp.	NHCC LB335	GE v|tome|x s 240	0.10368	0.10368	0.10368	190	190	-	-	-	Micro-CT scan
Lystrosaurus	declivis	NMQR 815	Nikon Metrology XTH 225/320 LC	0.086	0.086	0.086	70	120	-	-	-	Micro-CT scan
Lystrosaurus	murrayi	NMQR 3595	Nikon Metrology XTH 225/320 LC	0.125	0.125	0.125	70	120	-	-	-	Micro-CT scan
Sangusaurus	parringtonii	NMT RB42	GE v|tome|x s 240	0.12244	0.12244	0.12244	220	340	-	-	-	Micro-CT scan
Scylacocephalus	sp.	BP/1/216	Nikon Metrology XTH 225/320 LC	0.0589	0.0589	0.0589	110	110	-	-	-	Micro-CT scan
Lycaenops	sp.	NHCC LB178	North Star Imaging X5000 Industrial #D X-ray Inspection System	0.118	0.118	0.118	440	630	-	-	-	Micro-CT scan
Dixeya	nasuta	GPIT/RE/7119	ESRF	0.04571	0.04571	0.04571	150	-	-	-	-	Micro-CT scan
Gorgonsopsia indet	indet.	BP/1/155	Nikon Metrology XTH 225/320 LC	0.0799	0.0799	0.0799	115	200	-	-	-	Micro-CT scan
"Aloposaurus"	gracilis	GPIT/RE/7124	ESRF	0.04657	0.04657	0.04657	100	-	-	-	-	Micro-CT scan
Oliveirosuchus	parringtoni	BP/1/3849	Nikon Metrology XTH 225/320 LC	0.0655	0.0655	0.0655	135	200	-	-	-	Micro-CT scan
Euchambersia	mirabilis	NHMUK 5696	Metris X-Tek HMX ST 225	0.066	0.066	0.066	215	170	-	-	-	Micro-CT scan
Euchambersia	mirabilis	BP/1/4009	Nikon Metrology XTH 225/320 LC	0.05	0.05	0.05	110	150	-	-	-	Micro-CT scan
Ictidosuchoides	sp.	NHCC LB387	GE v|tome|x s 240	0.08	0.08	0.08	200	220	-	-	-	Micro-CT scan
Mupashi	migrator	NHCC LB44	GE v|tome|x s 240	0.052	0.052	0.052	200	230	-	-	-	Micro-CT scan
Microgomphodon	oligocynus	SAM-PK-10160	ESRF	0.0288	0.0288	0.0288	120	NA	-	-	-	Micro-CT scan
Choerosaurus	dejageri	SAM-PK-K8797	General Electric Phoenix VTomeX L240	0.05	0.05	0.05	-	-	-	-	-	Micro-CT scan
Procynosuchus	delaharpeae	NHMUK R37054	GE v|tome|x s 240	0.05644	0.05644	0.05644	160	180	-	-	-	Micro-CT scan
Cynosaurus	suppostus	BP/1/1563	Nikon Metrology XTH 225/320 LC	0.0291	0.0291	0.0291	80	70	-	-	-	Micro-CT scan
Cynosaurus	suppostus	BP/1/3926	Nikon Metrology XTH 225/320 LC	0.0708	0.0708	0.0708	130	150	-	-	-	Micro-CT scan
Galesaurus	planiceps	NMQR 860	Nikon Metrology XTH 225/320 LC	0.0588	0.0588	0.0588	170	200	-	-	-	Micro-CT scan
Thrinaxodon	liorhinus	BP/1/4263	Nikon Metrology XTH 225/320 LC	0.05	0.05	0.05	-	-	-	-	-	Micro-CT scan
Thrinaxodon	liorhinus	BP/1/7199	ESRF	0.091	0.091	0.091	96	NA	-	-	-	Micro-CT scan
Trirachodon	berryi	BP/1/4658	Nikon Metrology XTH 225/320 LC	0.0667	0.0667	0.0667	-	-	-	-	-	Micro-CT scan
Cricodon	kannemeyeri	AM 461	Nikon Metrology XTH 225/320 LC	0.0667	0.0667	0.0667	165	230	-	-	-	Micro-CT scan
Scalenodon	angustifrons	NMT RB581	GE v|tome|x s 240	0.04333	0.04333	0.04333	200	200	-	-	-	Micro-CT scan
Massethognathus	pascuali	BP/1/4245	Nikon Metrology XTH 225/320 LC	0.0645	0.0645	0.0645	140	140	-	-	-	Micro-CT scan
Luangwa	drysdalli	NHMUK R36995	Microtomograph RX EasyTom 150	0.0346821	0.0346821	0.0346821	120	248	-	-	-	Micro-CT scan
Lumkuia	fuzzi	BP/1/2669	Nikon Metrology XTH 225/320 LC	0.0443	0.0443	0.0443	140	155	-	-	-	Micro-CT scan
Chiniquodon	theotenicus	MCZ 3778	Microtomograph RX EasyTom 150	0.048	0.048	0.048	160	102	-	-	-	Micro-CT scan
Riograndia	guaibensis	UFRGS PV833T	NIKON XTH225ST	0.012	0.012	0.012	180	38	-	-	-	Micro-CT scan
Tritylodon	longaevus	BP/1/5088	Nikon Metrology XTH 225/320 LC	0.047	0.047	0.047	140	185	-	-	-	Micro-CT scan
Tritylodon	longaevus	BP/1/4778	Nikon Metrology XTH 225/320 LC	0.047	0.047	0.047	140	185	-	-	-	Micro-CT scan
Oligokyphus	major	NHMUK 7090	Microtomograph RX EasyTom 150	0.023796	0.023796	0.023796	130	168	-	-	-	Micro-CT scan
Pseudotherium	argentinus	PVSJ 882	Xradia microXCT 400 Scanner	0.04421	0.04421	0.04421	110	-	-	-	-	Micro-CT scan
Brasilodon	quadrangularis	UFRGS PV1043	NIKON XTH225ST	0.012	0.012	0.012	150	47	-	-	-	Micro-CT scan
Megazostrodon	rudnerae	BP/1/4983	Nikon Metrology XTH 225/320 LC	0.0306	0.0306	0.0306	140	155	-	-	-	Micro-CT scan
Morganucodon	oehleri	IVPP V8685	GE Phoenix Scanner v|tome|x	0.016264	0.016264	0.016264	90	180	-	-	-	Micro-CT scan
Morganucodon	oehleri	BMNH 2858	GE Phoenix Scanner v|tome|x	0.013205	0.013205	0.013205	240	170	-	-	-	Micro-CT scan
Morganucodon	watsoni	UMZC Eo.CR.22	Nikon Metrology XT H 225 ST High CT Scanner	0.002915	0.002915	0.002915	150	170	-	-	-	Micro-CT scan
Haldanadon	exspectatus	MG 6721	OMNI-X Universal HD600 Scanner	0.024	0.024	0.029	-	-	-	-	-	Micro-CT scan
Hadrocodium	wui	IVPP V8275	University of Texas High-resolution X-ray CT facility	0.0879	0.0879	0.0191	150	380	-	-	-	Micro-CT scan
Zaglossus	bartoni smeenki	AMNH 157072	University of Texas High-Resolution X-ray CT	0.0537	0.0537	0.175	180	133	-	-		Micro-CT scan
Tachyglossus	aculeatus	MS86	Nikon Metrology XTH 225/320 LC	0.0667	0.0667	0.0667	80	90	-	-	-	Micro-CT scan
Ornithorhynchus	anatinus	CEB 130091	SkyScan1173	0.0078857	0.0078857	0.0078857	130	61	Specimen was prepared as described in David et al. 2016 before scanning. Obtained from UCL, Departement of Cell and Developmental Biology	-	-	Micro-CT scan
Dryolestes	leiriensis	MG 6807 (Gui Mam 2/81)	Nikon v|tome|x s	0.01	0.01	0.01	-	-	-	-	-	Micro-CT scan
Dasyurus	viverrinus	CEB 130081	SkyScan1173	0.00716	0.00716	0.00716	130	61	Specimen was prepared as described in David et al. 2016 before scanning. Obtained from UCL, Departement of Cell and Developmental Biology	-	-	Micro-CT scan
Isoodon	obesulus	CEB 130085	SkyScan1173	0.00788575	0.00788575	0.00788575	130	61	Specimen was prepared as described in David et al. 2016 before scanning. Obtained from UCL, Departement of Cell and Developmental Biology	-	-	Micro-CT scan
Phascolarctos	cinereus	CEB 130095	SkyScan1173	0.00788575	0.00788575	0.00788575	130	61	Specimen was prepared as described in David et al. 2016 before scanning. Obtained from UCL, Departement of Cell and Developmental Biology	-	-	Micro-CT scan
Monodelphis	domestica	TMM-M-7599	University of Texas High-resolution X-ray CT facility	0.084	0.084	0.084	-	-	-	-	-	Micro-CT scan
Didelphis	virginiana	TMM-M-2517	University of Texas High-resolution X-ray CT facility	0.111	0.111	0.132	-	-	-	-	-	Micro-CT scan
Dasypus	novemcinctus	TMM-M-1885	University of Texas High-resolution X-ray CT facility	0.494	0.494	0.291	-	-	-	-	-	Micro-CT scan
Procavia	capensis	CEB-150012	SkyScan1173	0.008	0.008	0.008	130	61	Specimen was prepared as described in David et al. 2016 before scanning. Obtained from Leipzig University, Institut of Veterinary Pathology	-	-	Micro-CT scan
Elephas	maximus	CEB 150009	SkyScan1173	0.00894	0.00894	0.00894	130	61	Specimen was prepared as described in David et al. 2016 before scanning. Obtained from Leibniz Institute for Zoo and Wildlife Research	-	-	Micro-CT scan
Dugong	dugon	UM N-170	Skyscan/1076/invivo	0.036	0.036	0.036	100	-	-	-	-	Micro-CT scan
Trichechus	manatus	MSW03156	Washington University in Saint Louis, MO	0.537	0.537	0.038	-	-	-	-	-	Micro-CT scan
Orycteropus	afer	AMNH51909	University of Texas High-resolution X-ray CT facility	0.093	0.093	0.093	-	-	-	-	-	Micro-CT scan
Chrysochloris	sp.	AMNH82372	University of Texas High-resolution X-ray CT facility	0.085	0.085	0.05	-	-	-	-	-	Micro-CT scan
Hemicentetes	semispinosus	AMNH161535	University of Texas High-resolution X-ray CT facility	0.056	0.056	0.067	-	-	-	-	-	Micro-CT scan
Elephantulus	sp.	MNHN.AC.ZM.1930-92	SkyScan1173	0.007856	0.007856	0.007856	130	61	Specimen was prepared as described in David et al. 2016 before scanning.	-	-	Micro-CT scan
Macroscelides	proboscideus	AMNH161535	University of Texas High-resolution X-ray CT facility	0.151	151	0.055	-	-	-	-	-	Micro-CT scan
Cavia	porcellus	TMM-M-7283	University of Texas High-resolution X-ray CT facility	0.728	0.728	0.038	-	-	-	-	-	Micro-CT scan
Sciurus	vulgaris	CEB 130021	Skyscan1172	0.013568	0.013568	0.013568	100	100	Specimen was prepared as described in David et al. 2016 before scanning. Cadaver sampled in the wild.	-	-	Micro-CT scan
Mus	musculus	TMM-M-3196	University of Texas High-resolution X-ray CT facility	0.136	0.136	0.202	-	-	-	-	-	Micro-CT scan
Lepus	californicus	TMM-M-7500	University of Texas High-resolution X-ray CT facility	0.114	0.114	0.144	-	-	-	-	-	Micro-CT scan
Sylvilagus	floridanus	TMM-M-2689	University of Texas High-resolution X-ray CT facility	0.38	0.38	0.01	-	-	-	-	-	Micro-CT scan
Oryctolagus	cuniculus	CEB 130035	Skyscan1172	0.013568	0.013568	0.013568	100	100	Specimen was prepared as described in David et al. 2016 before scanning. Obtained from Leipzig University, Institut of Veterinary Pathology	-	-	Micro-CT scan
Tupaia	javanica	CEB 130099	SkyScan1173	0.007528	0.007528	0.007528	130	61	Specimen was prepared as described in David et al. 2016 before scanning. Obtained from University of Groningen, Departement of Anatomy	-	-	Micro-CT scan
Tupaia	glis	TMM-M-2256	University of Texas High-resolution X-ray CT facility	0.346	0.346	0.128	-	-	-	-	-	Micro-CT scan
Cynocephalus	volans	AMNH187859	University of Texas High-resolution X-ray CT facility	0.35	0.35	0.028	-	-	-	-	-	Micro-CT scan
Nycticebus	coucang	CEB 130090	SkyScan1173	0.007167	0.007167	0.007167	130	61	Specimen was prepared as described in David et al. 2016 before scanning. Obtained from University of Groningen, Departement of Anatomy	-	-	Micro-CT scan
Euoticus	elegantulus	CEB 140055	SkyScan1173	0.007856	0.007856	0.007856	130	61	Specimen was prepared as described in David et al. 2016 before scanning. Obtained from UCL, Departement of Cell and Developmental Biology	-	-	Micro-CT scan
Microcebus	sp.	CEB 140043	SkyScan1173	0.00788	0.00788	0.00788	130	61	Specimen was prepared as described in David et al. 2016 before scanning. Obtained from UCL, Departement of Cell and Developmental Biology	-	-	Micro-CT scan
Lemur	catta	CEB 130135	SkyScan1173	0.00857	0.00857	0.00857	130	61	Specimen was prepared as described in David et al. 2016 before scanning. Obtained from Leibniz Institute for Zoo and Wildlife Research	-	-	Micro-CT scan
Saimiri	sciureus	CEB 130037	SkyScan1173	0.0129	0.0129	0.0129	100	62	Specimen was prepared as described in David et al. 2016 before scanning. Obtained from Leipzig University, Institut of Veterinary Pathology	-	-	Micro-CT scan
Callithrix	jacchus	CEB 130123	SkyScan1173	0.00752814	0.00752814	0.00752814	130	61	Specimen was prepared as described in David et al. 2016 before scanning. Obtained from Leipzig University, Institut of Veterinary Pathology	-	-	Micro-CT scan
Papio	hamadryas	CEB 140064	BIR ACTIS5	0.01277	0.01277	0.01277	130	100	Specimen was prepared as described in David et al. 2016 before scanning. Obtained from Leipzig University, Institut of Veterinary Pathology	-	-	Micro-CT scan
Macaca	mulatta	CEB 130105	SkyScan1173	0.00788	0.00788	0.00788	130	61	Specimen was prepared as described in David et al. 2016 before scanning. Obtained from German Primate Center, Göttingen	-	-	Micro-CT scan
Macaca	fascicularis	CEB 130104	SkyScan1173	0.00788	0.00788	0.00788	130	61	Specimen was prepared as described in David et al. 2016 before scanning. Obtained from German Primate Center, Göttingen	-	-	Micro-CT scan
Hylobates	lar	CEB 130066	SkyScan1173	0.00860141	0.00860141	0.00860141	130	61	Obtained from Utrecht University, Departement of Veterinary Pathology	-	-	Micro-CT scan
Pongo	abelii	CEB 140065	SkyScan1173	0.00785651	0.00785651	0.00785651	130	61	Obtained from German Primate Center, Göttingen	-	-	Micro-CT scan
Homo	sapiens	CEB 130017	Skyscan1172	0.0135683	0.0135683	0.0135683	100	100	Specimen was prepared as described in David et al. 2016 before scanning. Obtained from Leipzig University, Institut of Anatomy	-	-	Micro-CT scan
Pan	paniscus	CEB 150021	SkyScan1173	0.01	0.01	0.01	130	61	Obtained from Wuppertal Zoo.	-	-	Micro-CT scan
Sorex	monticolus	unvouchered	University of Texas High-resolution X-ray CT facility	0.601	0.601	0.033	-	-	-	-	-	Micro-CT scan
Atelerix	albiventris	unvouchered	University of Texas High-resolution X-ray CT facility	0.068	0.068	0.082	-	-	-	-	-	Micro-CT scan
Nycteris	grandis	AMNH 268369	University of Texas High-resolution X-ray CT facility	0.07	0.07	0.072	-	-	-	-	-	Micro-CT scan
Tadarida	brasiliensis	TMM-M-3030	University of Texas High-resolution X-ray CT facility	0.229	0.229	0.3	-	-	-	-	-	Micro-CT scan
Carollia	perspicillata	CEB 130059	Skyscan1172	0.00678	0.00678	0.00678	100	100	Specimen was prepared as described in David et al. 2016 before scanning. Captive sample (Dpt Neurobiology, NEOUCOM, USA)	-	-	Micro-CT scan
Rhinolophus	ferrumequinum	AMNH245591	University of Texas High-resolution X-ray CT facility	0.13	0.13	0.265	-	-	-	-	-	Micro-CT scan
Pteropus	lylei	AMNH237593	University of Texas High-resolution X-ray CT facility	0.045	0.045	0.097	-	-	-	-	-	Micro-CT scan
Pteropus	rodricensis	CEB 130097	SkyScan1173	0.007167	0.007167	0.007167	130	61	Specimen was prepared as described in David et al. 2016 before scanning. Obtained from UCL, Departement of Cell and Developmental Biology	-	-	Micro-CT scan
Manis	tricuspis	AMNH53896	University of Texas High-resolution X-ray CT facility	0.101	0.101	0.116	-	-	-	-	-	Micro-CT scan
Cynictis	penicillata	CEB 130049	Skyscan1172	0.0135683	0.0135683	0.0135683	100	100	Specimen was prepared as described in David et al. 2016 before scanning. Obtained from Leipzig University, Institut of Veterinary Pathology	-	-	Micro-CT scan
Felis	catus	CEB 130151	SkyScan1173	0.007885	0.007885	0.007885	130	61	Specimen was prepared as described in David et al. 2016 before scanning. Obtained from Leipzig University, Institut of Veterinary Pathology	-	-	Micro-CT scan
Canis	lupus familiaris	CEB 130128	SkyScan1173	0.008959	0.008959	0.008959	130	61	Specimen was prepared as described in David et al. 2016 before scanning. Obtained from Leipzig University, Institut of Veterinary Pathology	-	-	Micro-CT scan
Nasua	nasua	CEB 130033	Skyscan1172	0.013568	0.013568	0.013568	100	100	Specimen was prepared as described in David et al. 2016 before scanning. Obtained from Leipzig University, Institut of Veterinary Pathology	-	-	Micro-CT scan
Eumetopias	jubatus	TMM M-171	University of Texas High-resolution X-ray CT facility	0.645	0.645	0.115	-	-	-	-	-	Micro-CT scan
Phoca	sp.	UM PV 251212	Skyscan/1076/invivo	0.0752	0.0752	0.0752	100	-	-	-	-	Micro-CT scan
Equus	ferus caballus	CEB 130056	Skyscan1172	0.013568	0.013568	0.013568	100	100	Specimen was prepared as described in David et al. 2016 before scanning. Obtained from Leipzig University, Institut of Veterinary Pathology	-	-	Micro-CT scan
Rhinoceros	sondaicus	UM N 785V	Skyscan/1076/invivo	0.07178	0.07178	0.07178	-	-	-	-	-	Micro-CT scan
Tapirus	terrestris	UM N-671	Skyscan/1076/invivo	0.1875	0.1875	0.25	-	-	-	-	-	Micro-CT scan
Lama	guanicoe	UM N- 228	Skyscan/1076/invivo	0.05	0.05	0.05	100	-	-	-	-	Micro-CT scan
Vicugna	pacos	CEB 130038	SkyScan1173	0.00788575	0.00788575	0.00788575	130	61	Specimen was prepared as described in David et al. 2016 before scanning. Obtained from Leipzig University, Institut of Veterinary Pathology	-	-	Micro-CT scan
Doliochoerus	quercyi	MNHN Qu1	Viscom X8050-16	0.055226	0.055226	0.055226	-	-	-	-	-	Micro-CT scan
Tayassu	pecari	UM N 03	Skyscan/1076/invivo	0.035812	0.035812	0.035812	100	-	-	-	-	Micro-CT scan
Babyrousa	babyrussa	AMNH M 2238	GE Phoenix Vtome x S	0.0639427	0.0639427	0.0639427	210	-	-	-	-	Micro-CT scan
Sus	scrofa domesticus	CEB 130005	Skyscan1172	0.013568	0.013568	0.013568	100	100	Specimen was prepared as described in David et al. 2016 before scanning. Obtained from Leipzig University, Institut of Pathology	-	-	Micro-CT scan
Hylochoerus	meinertzhageni	AMNH M 53672	GE Phoenix Vtome x S	0.0639427	0.0639427	0.0639427	200	-	-	-	-	Micro-CT scan
Potamochoerus	porcus	AMNH MO-294	GE Phoenix Vtome x S	0.0639427	0.0639427	0.0639427	210	-	-	-	-	Micro-CT scan
Phacochoerus	aethiopicus	AMNH MO-159	GE Phoenix Vtome x S	0.0639427	0.0639427	0.0639427	210	-	-	-	-	Micro-CT scan
Tursiops	truncatus	SDNHM21212	University of Texas High-resolution X-ray CT facility	0.346	0.346	0.128	-	-	-	-	-	Micro-CT scan
Hippopotamus	amphibius	AMNH M 24289	GE Phoenix Vtome x S	0.0601135	0.0601135	0.0601135	200	-	-	-	-	Micro-CT scan
Choeropsis	liberiensis	UCR 3116	EasyTom XL	0.109136	0.109136	0.109136	-	-	-	-	-	Micro-CT scan
Diplobune	minor	UM ITD 1080	Skyscan/1076/invivo	0.03616	0.03616	0.03616	100	-	-	-	-	Micro-CT scan
Bachitherium	sp.	UM PDS 3360	Skyscan/1076/invivo	0.03616	0.03616	0.03616	100	-	-	-	-	Micro-CT scan
Moschiola	meminna	UM 58V	Skyscan/1076/invivo	0.03584	0.03584	0.03584	100	-	-	-	-	Micro-CT scan
Rangifer	tarandus	UPPal ART-12-020	Viscom X8050-16	0.05	0.05	0.05	-	-	-	-	-	Micro-CT scan
Giraffa	camelopardalis antiquorum	RMCA 83,001-M-0014	Viscom X8050-16	0.0752	0.0752	0.0752	-	-	-	-	-	Micro-CT scan
Bos	primigenius taurus	CEB 130029	Skyscan1172	0.013568	0.013568	0.013568	100	10	Specimen was prepared as described in David et al. 2016 before scanning. Obtained from Leipzig University, Institut of Veterinary Pathology	-	-	Micro-CT scan
Etroplus	maculatus	-	MicroXCT high-resolution microCT system from Xradia Inc., Pleasanton, CA, USA	0.01	0.01	0.01	80	-	Specimen from Schulz-Mirbach, T., Heß, M., Metscher, B. D., & Ladich, F. (2013). A unique swim bladder-inner ear connection in a teleost fish revealed by a combined high-resolution microtomographic and three-dimensional histological study. BMC biology, 11(1), 1-13.	-	-	Surface mesh of membranous labyrinth
Poecilia	sphenops	-	MicroXCT high-resolution microCT system from Xradia Inc., Pleasanton, CA, USA	0.002	0.002	0.002	40	-	Specimen from Schulz-Mirbach et al.: Sensory epithelia of the fish inner ear in 3D: studied with high-resolution contrast enhanced microCT. Frontiers in Zoology 2013 10:63.	-	-	Surface mesh of membranous labyrinth
Steatocranus	tinanti	-	MicroXCT high-resolution microCT system from Xradia Inc., Pleasanton, CA, USA	0.004	0.004	0.004	40	-	Specimen from Schulz-Mirbach et al.: Sensory epithelia of the fish inner ear in 3D: studied with high-resolution contrast enhanced microCT. Frontiers in Zoology 2013 10:63.	-	-	Surface mesh of membranous labyrinth

## Sheet: Unsuccesfull specimens
Genus	Species	Specimen
Varanops	brevirostris	MCZ 1926
Varanosaurus	acutirostris	FMNH PR 1760
Dimetrodon	loomsi	FMNH UC 423
Edaphosaurus	novomexicanus	FMNH UC 674
Casea	broilli	FMNH UC 698
Nshimbodon	muchingaensis	NHCC LB277
Titanogomphodon	sp.	CGP R567
Cotylorhynchus	hancocki	FMNH UR 622
Oedalops	campi	UCMP 35758
Diademodon	sp.	UCMP 42446
Dimetrodon	sp.	BEG 31226-33
Ecteninion	lunensis	PVSJ 422
Exaeretodon	frenguelli	Museo de Ciencias Naturales, Universidad Nacional de San Juan, Argentina
Riograndia	guaibensis	UFRGS PV 596 T
Brasilodon	quadrangularis	UFRGS-PV-1030-T
Brasilodon	quadrangularis	UFRGS-PV-628
Gorgonopsia	indet.	UMZC T889
Silphoictidoides	ruhuhuensis	GPIT/RE/7139
Probainognathus	sp.	PVSJ 410
Probelesodon	sanjuanensis	PVSJ 411
Traversodontidae	indet.	NHCC LB29
