# Supplementary material for: Inner ear biomechanics reveals Late Triassic origin of mammalian endothermy
Source: Research Square preprint supplement (doi:10.21203/rs.3.rs-570966/v1), 2021-06-02
Supplement: Supplementary file 4 [file d7de8f36df2a9881ededfa12.xlsx]

## Sheet: 3D Bony Sample
Genus	Species	Specimen	Major Clade	Clade	Maj_a_B (mm)	Min_a_B (mm)	Maj_p_B (mm)	Min_p_B (mm)	Maj_l_B (mm)	Min_l_B (mm)	dS_a_B (mm)	dS_p_B (mm)	dS_l_B (mm)	R_a_B (mm)	R_p_B (mm)	R_l_B (mm)	e_a_B	e_p_B	e_l_B	LS_a_B (mm)	LS_p_B (mm)	LS_l_B (mm)	rS_a_B (mm)	rS_p_B (mm)	rS_l_B (mm)	CBL (mm)	CAOL (mm)	BM (g)	BT ( C)	TR	VR		Source of CBL	Source of CAOL	Source of BM	Source of BT
Caecilia	tentaculata	Kuh 175441	Amphibia	Gymnophiona	0.55	0.35	0.54	0.38	0.71	0.48	0.49	0.48	0.34	0.45	0.46	0.595	0.771389	0.710494	0.73685	1.52	2.2	2.72	0.245	0.24	0.17	23.3	15	149	22.8	Ectotherm	1.19		Measured on specimen (scan)	Calculated from ratio against CBL Measured on photograph of another specimen	Measured on FMNH 165532, FMNH 165531, FMNH 165533, average scaled using CBLs (square root of body mass was used for scaling)	Benjamin Tapley, Zoe Bryant, Sebastian Grant, Grant Kother, Yedra Feltrer, Nic Masters, Taina Strike, Iri Gill, Mark Wilkinson & David J Gower Towards evidence-based husbandry for caecilian amphibians:Substrate preference in Geotrypetes seraphini (Amphibia: Gymnophiona: Dermophiidae) The Herpetological Bulletin 129, 2014: 15-18 Based on Geotrypetes seraphini. Common average temperature to keep ca…	.
Pelodytes	caucasicus	CAS-H-94059	Amphibia	Anura	0.9355	0.5739	0.822	0.548	0.9716	0.81075	0.298	0.2973	0.358	0.7547	0.685	0.891175	0.789719	0.745356	0.551086	2.395	2.584	3.407	0.149	0.14865	0.179	11.8	8.1	5.7	13.255	Ectotherm	1.19		Measured on specimen (scan)	Measured on specimen (scan)	Santini, L., Benítez‐López, A., Ficetola, G.F. and Huijbregts, M.A., 2018. Length–mass allometries in amphibians. Integrative zoology, 13(1), pp.36-45. Calculated from snout to vent length using allometric regressions	Esteban, M., Sánchez-Herráiz, S., Barbadillo, L.J., Castanet, J. & Márquez, R. (2002). Effects of age, size and temperature on the advertisement calls of two Spanish populations of Pelodytes punctatus. Amphibia–Reptilia 23, 249–258.	.
Rana	pipiens	Specimen from Mason, M.J., Segenhout, J.M., Cobo-Cuan, A. et al. The Frog Inner Ear: Picture Perfect?. JARO 16, 171–188 (2015).	Amphibia	Anura	1.60164	0.94284	1.3959	1.10727	2.12274	2.0898	0.5562	0.5994	0.513	1.27224	1.25158	2.10627	0.808372	0.608922	0.175484	4.29138	4.6494	6.72624	0.2781	0.2997	0.2565	22.74	17.91	45	25	Ectotherm	1.19		Santini, L., Benitez‐Lopez, A., Ficetola, G.F. and Huijbregts, M.A., 2018. Length–mass allometries in amphibians. Integrative zoology, 13(1), pp.36-45. Calculated by scaling the body mass of the specimen to the snout-to-vent-length, using allometric regressions, and then using a CBL ratio against snout-to-vent length measured on another specimen	Calculated from ratio against CBL Measured on photograph of another specimen	Mason, M.J., Segenhout, J.M., Cobo-Cuan, A. et al. The Frog Inner Ear: Picture Perfect?. JARO 16, 171–188 (2015).	Maniero, G.D. and Carey, C., 1997. Changes in selected aspects of immune function in the leopard frog, Rana pipiens, associated with exposure to cold. Journal of Comparative Physiology B, 167(4), pp.256-263.	.
Eleutherodactylus	limbatus	Specimen from Mason, M.J., Segenhout, J.M., Cobo-Cuan, A. et al. The Frog Inner Ear: Picture Perfect?. JARO 16, 171–188 (2015).	Amphibia	Anura	0.4602	0.2548	0.3978	0.2184	0.4498	0.3926	0.1716	0.1872	0.2236	0.3575	0.3081	0.4212	0.832735	0.835809	0.48802	0.90792	0.81952	1.4196	0.0858	0.0936	0.1118	4.2	3.6	0.2	25.2	Ectotherm	1.19		Santini, L., Benitez‐Lopez, A., Ficetola, G.F. and Huijbregts, M.A., 2018. Length–mass allometries in amphibians. Integrative zoology, 13(1), pp.36-45. Calculated by scaling the body mass of the specimen to the snout-to-vent-length, using allometric regressions, and then using a CBL ratio against snout-to-vent length measured on another specimen	Calculated from ratio against CBL Measured on photograph of another specimen	Mason, M.J., Segenhout, J.M., Cobo-Cuan, A. et al. The Frog Inner Ear: Picture Perfect?. JARO 16, 171–188 (2015).	Rodríguez, A., Alonso, R., Rodríguez, J.A. and Vences, M., 2012. Geographic distribution, colour variation and molecular diversity of miniature frogs of the Eleutherodactylus limbatus group from Cuba. Salamandra, 48(2), pp.71-91.	.
Xenopus	laevis	Specimen from Mason, M.J., Segenhout, J.M., Cobo-Cuan, A. et al. The Frog Inner Ear: Picture Perfect?. JARO 16, 171–188 (2015).	Amphibia	Anura	1.15525	0.6405	0.95	0.5595	1.3585	1.006	0.3	0.33	0.285	0.897875	0.75475	1.18225	0.832233	0.808171	0.672031	2.7655	2.404	4.737	0.15	0.165	0.1425	7.9	6.84	57.5	22	Ectotherm	1.19		Santini, L., Benitez‐Lopez, A., Ficetola, G.F. and Huijbregts, M.A., 2018. Length–mass allometries in amphibians. Integrative zoology, 13(1), pp.36-45. Calculated by scaling the body mass of the specimen to the snout-to-vent-length, using allometric regressions, and then using a CBL ratio against snout-to-vent length measured on another specimen	Calculated from ratio against CBL Measured on photograph of another specimen	Mason, M.J., Segenhout, J.M., Cobo-Cuan, A. et al. The Frog Inner Ear: Picture Perfect?. JARO 16, 171–188 (2015). Average of male specimens	Casterlin, M.E. and Reynolds, W.W., 1980. Diel activity and thermoregulatory behavior of a fully aquatic frog: Xenopus laevis. Hydrobiologia, 75(2), pp.189-191.	.
Lissotriton	vulgaris	UF38991	Amphibia	Caudata	0.84	0.565	0.615	0.56	0.905	0.735	0.38	0.33	0.36	0.7025	0.5875	0.82	0.739989	0.413357	0.583442	2.4	2.36	2.95	0.19	0.165	0.18	8	5.9	2	21.7	Ectotherm	1.19		Estimated from L. helveticus (0.855, but here for L. italicus 0.8cm)	Calculated from ratio against CBL Measured on photograph of another specimen	Santini, L., Benítez‐López, A., Ficetola, G.F. and Huijbregts, M.A., 2018. Length–mass allometries in amphibians. Integrative zoology, 13(1), pp.36-45. Calculated from snout to vent length using allometric regressions	Balogová M, Gvoždík L (2015) Can Newts Cope with the Heat? Disparate Thermoregulatory Strategies of Two Sympatric Species in Water. PLoS ONE 10(5): e0128155. doi:10.1371/journal. pone.0128155	.
Proteus	anguinus	MVZ-Herps-244076	Amphibia	Caudata	1.7	0.775	1.185	0.705	1.92	1.095	0.53	0.53	0.52	1.2375	0.945	1.5075	0.89004	0.803773	0.821428	3.57	3.97	5.86	0.265	0.265	0.26	18.9	14.6	17.5	9.5	Ectotherm	1.19		Measured on a 20cm skeleton	Calculated from ratio against CBL Measured on photograph of another specimen	Santini, L., Benítez‐López, A., Ficetola, G.F. and Huijbregts, M.A., 2018. Length–mass allometries in amphibians. Integrative zoology, 13(1), pp.36-45. Calculated from snout to vent length using allometric regressions	Sket, B. (1997). ''Distribution of Proteus (Amphibia: Urodela: Proteidae) and its possible explanation.'' Journal of Biogeography, 24, 263-280.	.
Diadectes	sideropelicus	FMNH UR 27	Stem-Amniota	Stem-Amniota	4.42	2.75	5.31	2.21	4.02	3.92	1.1	0.95	1.11	3.585	3.76	3.97	0.782881	0.909275	0.221658	16.4	15.8	19.5	0.55	0.475	0.555	206.3	104.9	42778.3	-	Unknown	1.19		Measured on specimen	Calculated from ratio against CBL Measured on photograph of another specimen	Predicted from CBL and CAOL using an allometric regression computed in this study	-	.
Captorhinus	aguti	TMM 40882-41	Basal Reptilia	Basal Reptilia	2.5935	1.913	2.169	2.1175	3.647	2.75	0.597	0.653	0.737	2.25325	2.14325	3.1985	0.675223	0.216618	0.656823	7.426	9.09	14.659	0.2985	0.3265	0.3685	59.6	38.6	1115.89	-	Unknown	1.19		Measured on specimen	Calculated from ratio against CBL Measured on photograph of another specimen	Predicted from CBL and CAOL using an allometric regression computed in this study	-	.
Labidosaurus	hamatus	FMNH UR 161	Basal Reptilia	Basal Reptilia	3.69	2.92	3.26	2.98	4.5425	3.88	0.72	0.76	0.87	3.305	3.12	4.21125	0.611392	0.405465	0.520018	11.48	13.04	17.008	0.36	0.38	0.435	184.9	109.4	40422.6	-	Unknown	1.19		Measured on specimen	Calculated from ratio against CBL Measured on a reconstruction of the skull	Predicted from CBL and CAOL using an allometric regression computed in this study	-	.
Youngina	capensis	BPI/1/375	Basal Reptilia	Basal Reptilia	2.76	1.58	2	1.61	2.3	1.76	0.55	0.52	0.62	2.17	1.805	2.03	0.81993	0.593275	0.643772	7.75	6.44	10.27	0.275	0.26	0.31	49	28.7	427.483	-	Unknown	1.19		Measured on specimen	Calculated from ratio against CBL Measured on photograph of another specimen	Predicted from CBL and CAOL using an allometric regression computed in this study	-	.
Chelydra	serpentina	UF22159	Testudinata	Testudinata	4.6	2.01	4.685	2.05	4.49	2.675	1.03	0.97	1.18	3.305	3.3675	3.5825	0.899483	0.899186	0.803156	12.88	12.4	15.84	0.515	0.485	0.59	85	72.4	13730	27.6	Ectotherm	1.19		Measured on specimen (scan)	Calculated from ratio against CBL Measured on photograph of another specimen	Iverson, J.B., 1984. Proportional skeletal mass in turtles. Florida Scientist, pp.1-11. Calculated from carapace length using allometric regressions	Schuett, G. W. and R. E Jr Gatten . 1980. Thermal preference in snapping turtles (Chelydra serpentina). Copeia 1980:149–152.	.
Kinosternon	hirpites	Uf Herp 45035	Testudinata	Testudinata	2.432	0.8595	2.128	1.022	2.3955	1.5295	0.447	0.497	0.52	1.64575	1.575	1.9625	0.935467	0.877124	0.769631	6.42	6.178	7.695	0.2235	0.2485	0.26	28.8	24.2	80	24.4	Ectotherm	1.19		Measured on specimen (scan)	Measured on specimen (scan)	Iverson, J.B., 1984. Proportional skeletal mass in turtles. Florida Scientist, pp.1-11. Calculated from carapace length using allometric regressions	Mahmoud, I. Y. (1969). Comparative ecology of the kinosternid turtles of Oklahoma. Southwestern Naturalist 14, 31–66. Average of K.subrubrum and K.flavescens	.
Chelonia	mydas	YPM HERR 004058	Testudinata	Testudinata	7.537	4.566	7.126	3.93	7.3575	5.342	2.257	2.803	2.865	6.0515	5.528	6.34975	0.795608	0.834174	0.687629	19.411	18.006	25.448	1.1285	1.4015	1.4325	153	101.5	48336	22	Ectotherm	1.19		Measured on specimen (scan)	Calculated from ratio against CBL Measured on photograph of another specimen	Iverson, J.B., 1984. Proportional skeletal mass in turtles. Florida Scientist, pp.1-11. Calculated from carapace length using allometric regressions	Heath, M. E. & McGinnis, S. M. (1980). Body temperature and heat transfer in green sea turtles, Chelonia mydas. Copeia 1980, 767–773.	.
Sacalia	quadriocellata	NCSM 76496	Testudinata	Testudinata	2.096	1.002	2.027	1.151	2.4395	1.1985	0.556	0.564	0.593	1.549	1.589	1.819	0.878331	0.823143	0.870997	5.684	6.341	7.596	0.278	0.282	0.2965	28.1	25	255	24.5	Ectotherm	1.19		Measured on specimen (scan)	Measured on specimen (scan)	Iverson, J.B., 1984. Proportional skeletal mass in turtles. Florida Scientist, pp.1-11. Calculated from carapace length using allometric regressions	Taken from https://www.hetterrarium.com/en_GB/a-47328653/info-chelonians/sacalia-sp-info-care/ Based on requirements to breed in captivity	.
Graptemys	sp.	Uf Herp 61899	Testudinata	Testudinata	1.75	0.89	1.51	0.775	1.78	0.905	0.51	0.59	0.54	1.32	1.1425	1.3425	0.86102	0.858242	0.861105	5.2	5.01	6.32	0.255	0.295	0.27	18.9	16.2	120	22.5	Ectotherm	1.19		Measured on specimen (scan)	Calculated from ratio against CBL Measured on photograph of another specimen	Iverson, J.B., 1984. Proportional skeletal mass in turtles. Florida Scientist, pp.1-11. Calculated from carapace length using allometric regressions	Bulté G and Blouin-Demers G. 2008. Northern map turtles (Graptemys geographica) derive energy from the pelagic pathway through predation on zebra mussels (Dreissena polymorpha). Freshwater Biol 53: 497–508.	.
Trachemys	scripta	Specimen from Serjoscha W Evers, James M Neenan, Gabriel S Ferreira, Ingmar Werneburg, Paul M Barrett, Roger B J Benson, Neurovascular anatomy of the protostegid turtle Rhinochelys pulchriceps and comparisons of membranous and endosseous labyrinth shape in an extant turtle, Zoological Journal of the Linnean Society, Volume 187, Issue 3, November 2019, Pages 800–828	Testudinata	Testudinata	3.37	1.415	2.94	1.415	2.625	1.84	0.89	1.09	1.01	2.3925	2.1775	2.2325	0.907579	0.87656	0.713208	8.09	8.16	8.51	0.445	0.545	0.505	52.5632	33.3	2500	25.6	Ectotherm	1.19		Calculated from ratio against CAOL Measured on photograph of another specimen	Evers S W, Neenan J M, Ferreira G S, Werneburg I, Barrett P M, Benson R B J, Neurovascular anatomy of the protostegid turtle Rhinochelys pulchriceps and comparisons of membranous and endosseous labyrinth shape in an extant turtle, Zoological Journal of the Linnean Society, Volume 187, Issue 3, November 2019, Pages 800–828 CAOL estimated using the brain endocast measurement provided by Serjoscha W…	Wang, J., Li, H., Wang, T., Chen, B., Cui, J. and Shi, H., 2019. Developmental plasticity of hearing sensitivity in red-eared slider Trachemys scripta elegans. BioRxiv, p.825968. Calculated from carapace length using allometric regressions, by scaling skull length to carapace length using another specimen	Espindola, S., Parra, J.L. and Vázquez-Domínguez, E., 2019. Fundamental niche unfilling and potential invasion risk of the slider turtle Trachemys scripta. PeerJ, 7, p.e7923.	.
Prolacerta	broomi	BP/1/3575	Fossil archosaur	Fossil archosaur	3.43	1.92	2.23	2.04	2.62	2.04	0.7	0.72	0.85	2.675	2.135	2.33	0.82865	0.403911	0.627488	9.5	7	13.3	0.35	0.36	0.425	57.3	30.2	570.008	-	Unknown	1.19		Measured on specimen	Calculated from ratio against CBL Measured on photograph of another specimen	Predicted from CBL and CAOL using an allometric regression computed in this study	-	.
Alligator	mississipiensis	TMM M-983	Crocodylia	Crocodylia	4.565	2.54	3.96	1.985	3.53	2.19	1.17	1.26	1.16	3.5525	2.9725	2.86	0.83091	0.865295	0.784288	13.41	10.62	11.68	0.585	0.63	0.58	196.3	72.4	15848	32.5	Ectotherm	1.19		Measured on specimen (scan)	Calculated from ratio against CBL Measured on photograph of another specimen	GJW, W. and Messel, H., 1978. Morphometric analysis of Crocodylus porosus from the north coast of Arnhem Land, northern Australia. Australian Journal of Zoology, 26(1), pp.1-27. Calculated from CBL using allometric regressions based on C. porosus	Markwick, P. 1998. Fossil crocodilians as indicators of Late Cretaceous and Cenozoic climates: implications for using palaeontological data in reconstructing palaeoclimate. Palaeogeography, Palaeoclimatology, Palaeoecology, 137:205-271.	.
Caiman	crocodilus	FMNH 73711	Crocodylia	Crocodylia	4.34	2.17	3.215	1.895	3.515	2.055	0.61	0.52	0.69	3.255	2.555	2.785	0.866025	0.807823	0.811295	12.85	8.75	11.93	0.305	0.26	0.345	115.8	48.1	7000	32.5	Ectotherm	1.19		Measured on specimen (scan)	Calculated from ratio against CBL Measured on photograph of another specimen	Taken from https://animaldiversity.org/accounts/Caiman_crocodilus/ using the lower end of the range	Markwick, P. 1998. Fossil crocodilians as indicators of Late Cretaceous and Cenozoic climates: implications for using palaeontological data in reconstructing palaeoclimate. Palaeogeography, Palaeoclimatology, Palaeoecology, 137:205-271.	.
Tomistoma	schlegelii	CEB-140070	Crocodylia	Crocodylia	7.551	3.7105	6.813	3.1435	6.8555	4.989	1.658	1.6614	2.0894	5.63075	4.97825	5.92225	0.870939	0.887194	0.685856	21.112	17.356	22.926	0.829	0.8307	1.0447	567.9	189.3	251188	25.5	Ectotherm	1.19		Measured on specimen	Calculated from ratio against CBL Measured on photograph of another specimen	Sereno, P.C., Larsson, H.C., Sidor, C.A. and Gado, B., 2001. The giant crocodyliform Sarcosuchus from the Cretaceous of Africa. Science, 294(5546), pp.1516-1519. Calculated from CBL using allometric regressions	Markwick, P. 1998. Fossil crocodilians as indicators of Late Cretaceous and Cenozoic climates: implications for using palaeontological data in reconstructing palaeoclimate. Palaeogeography, Palaeoclimatology, Palaeoecology, 137:205-271. Optimal zoo water temperature.	.
Gavialis	gangeticus	MNHN A-5312	Crocodylia	Crocodylia	8.935	4.07	7.67	4.09	8.075	6.385	1.36	1.87	1.85	6.5025	5.88	7.23	0.89023	0.84596	0.612188	25.55	20.64	29.52	0.68	0.935	0.925	511.43	141.4	158480	-	Ectotherm	1.19		Measured on specimen	Calculated from ratio against CBL Measured on photograph of another specimen	Sereno, P.C., Larsson, H.C., Sidor, C.A. and Gado, B., 2001. The giant crocodyliform Sarcosuchus from the Cretaceous of Africa. Science, 294(5546), pp.1516-1519. Calculated from CBL using allometric regressions	-	.
Crocodylus	johnstoni	OUVC 10425	Crocodylia	Crocodylia	3.52	1.8395	3.035	1.49	2.827	1.822	0.672	0.716	0.693	2.67975	2.2625	2.3245	0.852587	0.871194	0.764605	10.444	9.217	11.165	0.336	0.358	0.3465	120	44.1	3160	31	Ectotherm	1.19		Measured on TMM M-6807	Calculated from ratio against CBL Measured on photograph of another specimen	GJW, W. and Messel, H., 1978. Morphometric analysis of Crocodylus porosus from the north coast of Arnhem Land, northern Australia. Australian Journal of Zoology, 26(1), pp.1-27. Scaled based on CBL to BM proportions on C. porosus	Markwick, P. 1998. Fossil crocodilians as indicators of Late Cretaceous and Cenozoic climates: implications for using palaeontological data in reconstructing palaeoclimate. Palaeogeography, Palaeoclimatology, Palaeoecology, 137:205-271.	.
Crocodylus	niloticus	UCL X183	Crocodylia	Crocodylia	8.325	4.2765	6.6285	3.983	7.488	5.347	1.448	1.772	2.156	6.30075	5.30575	6.4175	0.857974	0.799332	0.700068	22.41	19.114	26.299	0.724	0.886	1.078	463.7	160.4	199520	26.8	Ectotherm	1.19		Measured on the skull in http://www.ucl.ac.uk/museums-static/obl4he/vertebratepalaeo/18_crocodylus.html	Calculated from ratio against CBL Measured on photograph of another specimen	GJW, W. and Messel, H., 1978. Morphometric analysis of Crocodylus porosus from the north coast of Arnhem Land, northern Australia. Australian Journal of Zoology, 26(1), pp.1-27. Scaled based on CBL to BM proportions on C. porosus	Amiot R, et al. (2007) Oxygen isotope fractionation between crocodilian phosphate and water. Palaeogeogr Palaeoclimatol Palaeoecol 243:412–420.	.
Crocodylus	moreletii	TMM M-4980	Crocodylia	Crocodylia	6.225	3.415	5.435	2.82	5.86	3.305	0.94	1.11	1.3	4.82	4.1275	4.5825	0.836089	0.85486	0.825779	18.12	15.44	19.45	0.47	0.555	0.65	276.8	104.3	31600	-	Ectotherm	1.19		Measured on specimen	Calculated from ratio against CBL Measured on photograph of another specimen	GJW, W. and Messel, H., 1978. Morphometric analysis of Crocodylus porosus from the north coast of Arnhem Land, northern Australia. Australian Journal of Zoology, 26(1), pp.1-27. Scaled based on CBL to BM proportions on C. porosus	-	.
Crocodylus	intermedius	FMNH 75662	Crocodylia	Crocodylia	7.264	4.206	6.209	3.207	7.165	3.901	1.07	1.251	1.195	5.735	4.708	5.533	0.815313	0.856282	0.838792	20.508	17.683	23.286	0.535	0.6255	0.5975	560	157.7	126000	24	Ectotherm	1.19		Measured on specimen	Calculated from ratio against CBL Measured on photograph of another specimen	GJW, W. and Messel, H., 1978. Morphometric analysis of Crocodylus porosus from the north coast of Arnhem Land, northern Australia. Australian Journal of Zoology, 26(1), pp.1-27. Scaled based on CBL to BM proportions on C. porosus	Markwick, P. 1998. Fossil crocodilians as indicators of Late Cretaceous and Cenozoic climates: implications for using palaeontological data in reconstructing palaeoclimate. Palaeogeography, Palaeoclimatology, Palaeoecology, 137:205-271. Optimal zoo water temperature.	.
Crocodylus	acutus	FMNH 59071	Crocodylia	Crocodylia	7.2155	4.076	5.857	3.493	6.872	4.618	1.422	1.791	1.699	5.64575	4.675	5.745	0.825163	0.802702	0.740549	21.342	18.689	23.715	0.711	0.8955	0.8495	416.14	160.3	316277	-	Ectotherm	1.19		Measured on specimen	Calculated from ratio against CBL Measured on photograph of another specimen	GJW, W. and Messel, H., 1978. Morphometric analysis of Crocodylus porosus from the north coast of Arnhem Land, northern Australia. Australian Journal of Zoology, 26(1), pp.1-27. Scaled based on CBL to BM proportions on C. porosus	-	.
Struthio	camelus	CEB-130023	Aves	Palaeognathae	6.9775	3.8265	4.2385	2.918	3.725	2.9025	0.8194	0.8912	0.8986	5.402	3.57825	3.31375	0.836212	0.725283	0.626782	27.309	17.533	14.734	0.4097	0.4456	0.4493	186.5	83.2	110000	38.7	Endotherm	1.91		Measured on TMM M-4826	Calculated from ratio against CBL Measured on photograph of another specimen	Taken as average from http://animaldiversity.ummz.umich.edu/accounts/Struthio_camelus/	McNab, B. 1966. An Analysis of the Body Temperatures of Birds. The Condor, 68:47-55.	.
Apteryx	haastii	NHMUK S/1972.1.21	Aves	Palaeognathae	3.01	1.5	2.385	1.62	2.275	2.23	0.51	0.45	0.47	2.255	2.0025	2.2525	0.866982	0.733911	0.197912	10.59	8.16	8.94	0.255	0.225	0.235	150	36	3250	39	Endotherm	1.91		Measured on specimen (scan)	Measured on specimen (scan)	Taken as average from http://animaldiversity.ummz.umich.edu/accounts/Apteryx_haastii/	McNab, B. 1966. An Analysis of the Body Temperatures of Birds. The Condor, 68:47-55.	.
Dromaius	novaehollandiae	NHMUK S/2001.50.1	Aves	Palaeognathae	5.66	3.29	3.85	2.78	3.63	3	0.78	0.85	0.76	4.475	3.315	3.315	0.813709	0.691812	0.563016	19.9	12.5	15.3	0.39	0.425	0.38	153.4	75.3	38000	39	Endotherm	1.91		Measured on specimen	Calculated from ratio against CBL Measured on photograph of another specimen	Taken as average from http://animaldiversity.ummz.umich.edu/accounts/Dromaius_novaehollandiae/	McNab, B. 1966. An Analysis of the Body Temperatures of Birds. The Condor, 68:47-55.	.
Casuarius	casuarius	NHMUK 1939.12.9.964	Aves	Palaeognathae	8.12	3.98	4.92	3.34	4.86	3.48	0.89	0.98	0.88	6.05	4.13	4.17	0.871639	0.734266	0.69805	27.8	17.4	20.9	0.445	0.49	0.44	187.5	89.9	44000	39	Endotherm	1.91		Measured on specimen (scan)	Calculated from ratio against CBL Measured on photograph of another specimen	Taken as average from http://animaldiversity.ummz.umich.edu/accounts/Casuarius_casuarius/	McNab, B. 1966. An Analysis of the Body Temperatures of Birds. The Condor, 68:47-55.	.
Rhynchotus	rufescens	NMS Z.1890.28.9	Aves	Palaeognathae	3.08	2.12	2.37	1.915	2.73	1.935	0.52	0.52	0.58	2.6	2.1425	2.3325	0.725415	0.589159	0.705418	13.31	9.79	12.5	0.26	0.26	0.29	68	28.6	980	40.03	Endotherm	1.91		Measured on specimen (scan)	Calculated from ratio against CBL Measured on photograph of another specimen	O’Gorman EJ, Hone DWE (2012) Body Size Distribution of the Dinosaurs. PLoS ONE 7(12): e51925. doi:10.1371/journal.pone.0051925 Average of male and female	Bergtold, William Harry. A Study of the Incubation Periods of Birds; What Determines Their Lengths,. Denver, Col.: Kendrick-Bellamy, 1917.	.
Meleagris	gallopavo	CEB-130069	Aves	Galloanserae	4.77	2.88	3.25	2.35	3.81	2.65	0.64	0.72	0.72	3.825	2.8	3.23	0.797156	0.690768	0.718489	20.5	12.9	16.2	0.32	0.36	0.36	97.1	56.2	10890	41.2	Endotherm	1.91		Measured on specimen	Calculated from ratio against CBL Measured on photograph of another specimen	Taken as average from http://animaldiversity.ummz.umich.edu/accounts/Meleagris_gallopavo/	McNab, B. 1966. An Analysis of the Body Temperatures of Birds. The Condor, 68:47-55.	.
Gallus	gallus	NMS Z.1931.43_Gallus	Aves	Galloanserae	3.825	2.27	2.675	2.035	2.96	2.15	0.5	0.46	0.56	3.0475	2.355	2.555	0.80486	0.649048	0.687324	16.25	11.04	13.49	0.25	0.23	0.28	81	45.1	1000	41.5	Endotherm	1.91		Measured on specimen	Calculated from ratio against CBL Measured on photograph of another specimen	O’Gorman EJ, Hone DWE (2012) Body Size Distribution of the Dinosaurs. PLoS ONE 7(12): e51925. doi:10.1371/journal.pone.0051925 Average of male and female	McNab, B. 1966. An Analysis of the Body Temperatures of Birds. The Condor, 68:47-55.	.
Lophura	diardi	MNHN unvouchered	Aves	Galloanserae	3.28	2.39	2.69	1.83	2.78	1.875	0.56	0.58	0.66	2.835	2.26	2.3275	0.684877	0.732936	0.738311	14.76	11.02	12.64	0.28	0.29	0.33	72	42.4	1222	-	Endotherm	1.91		Measured on specimen	Calculated from ratio against CBL Measured on photograph of another specimen	O’Gorman EJ, Hone DWE (2012) Body Size Distribution of the Dinosaurs. PLoS ONE 7(12): e51925. doi:10.1371/journal.pone.0051925 Average of male and female	-	.
Phasianus	colchicus	NMS Z.1931.43_Phasanius	Aves	Galloanserae	2.89	2.1	2.325	1.885	2.54	1.945	0.48	0.45	0.53	2.495	2.105	2.2425	0.687015	0.585389	0.643141	12.45	9.54	11.32	0.24	0.225	0.265	74	44.7	1000	41.8	Endotherm	1.91		Measured on specimen	Calculated from ratio against CBL Measured on photograph of another specimen	Pike and Maitland 2004. Scaling of bird claws. Journal of Zoology 262: 73-81	Westerskov K, 1956. Incubation temperatures of the pheasant, Phasianus colchicus. Emu 56: 405-420.	.
Coturnix	coturnix	NMS Z.1931.43_Coturnix	Aves	Galloanserae	2.035	1.49	1.73	1.3	2.005	1.255	0.43	0.38	0.47	1.7625	1.515	1.63	0.681104	0.659796	0.779875	9.17	7.32	8.94	0.215	0.19	0.235	48	28.5	112.5	42	Endotherm	1.91		Measured on specimen	Calculated from ratio against CBL Measured on photograph of another specimen	Taken as average from http://animaldiversity.ummz.umich.edu/accounts/Coturnix_coturnix/	Nomoto, S., Rautenberg, W. & Iriki, M. Temperature regulation during exercise in the Japanese quail (Coturnix coturnix japonica). J Comp Physiol B 149, 519–525 (1983).	.
Cygnus	olor	NHMUK S/1995.11.1	Aves	Galloanserae	4.7395	2.455	2.92	2.914	3.0585	3.019	0.822	0.853	0.932	3.59725	2.917	3.03875	0.855388	0.0640731	0.160196	15.634	11.818	12.784	0.411	0.4265	0.466	178	56.4	10950	40.1	Endotherm	1.91		Measured on specimen	Calculated from ratio against CBL Measured on photograph of another specimen	Taken as average from http://animaldiversity.ummz.umich.edu/accounts/Cygnus_olor/	McNab, B. 1966. An Analysis of the Body Temperatures of Birds. The Condor, 68:47-55. Temperature data for Cygnus buccinator	.
Anas	undulata	CEB-130140	Aves	Galloanserae	2.77	1.45	2.24	1.36	2.2	1.63	0.49	0.61	0.49	2.11	1.8	1.915	0.852047	0.794593	0.671605	9.8	8.9	9.1	0.245	0.305	0.245	104	45.8	965	-	Endotherm	1.91		Measured on skull on Skullsite	Measured on skull on Skullsite	Hockey, P.A.R., Dean, W.R.J. & Ryan, P.G. (eds) (2005) Roberts – birds of southern Africa, 7th edn. Trustees of the John Voelcker Bird Book Fund, Cape Town.	-	.
Tachyeres	brachypterus	NHMUK S/2004.7.1	Aves	Galloanserae	3.775	1.895	2.95	2.07	3.065	2.075	0.67	0.63	0.62	2.835	2.51	2.57	0.864875	0.712478	0.735985	14.1	12.23	11.77	0.335	0.315	0.31	123	50.7	3450	-	Endotherm	1.91		Measured on specimen (scan)	Calculated from ratio against CBL Measured on photograph of another specimen	O’Gorman EJ, Hone DWE (2012) Body Size Distribution of the Dinosaurs. PLoS ONE 7(12): e51925. doi:10.1371/journal.pone.0051925 Average of male and female	-	.
Aythya	fuligula	NHMUK S/1987.27.1	Aves	Galloanserae	3.02	1.35	2.29	1.4	2.39	1.55	0.51	0.48	0.5	2.185	1.845	1.97	0.894524	0.791357	0.761184	11	7.9	8.2	0.255	0.24	0.25	90	35.7	940	41.3	Endotherm	1.91		Measured on specimen (scan)	Calculated from ratio against CBL Measured on photograph of another specimen	O’Gorman EJ, Hone DWE (2012) Body Size Distribution of the Dinosaurs. PLoS ONE 7(12): e51925. doi:10.1371/journal.pone.0051925 Average of male and female	McNab, B. 1966. An Analysis of the Body Temperatures of Birds. The Condor, 68:47-55. Temperature data for Aythya affinis	.
Apus	apus	CEB-140032	Aves	Basal Landbirds	2.2935	1.3205	1.85	1.41	2.11	1.47	0.53	0.56	0.56	1.807	1.63	1.79	0.81762	0.647386	0.71738	8.9	7.5	10	0.265	0.28	0.28	27.4	17.8	54	-	Endotherm	1.91		Measured on skull on Skullsite	Calculated from ratio against CBL Measured on photograph of another specimen	Welhun, C.V., 1994. Flight speeds of migrating birds: a test of maximum range speed predictions from three aerodynamic equations. Behavioral Ecology, 5(1), pp.1-8.	-	.
Selasphorus	rufus	NMS Z.2002.108.2	Aves	Basal Landbirds	1.11	0.715	0.965	0.71	1.045	0.715	0.24	0.22	0.23	0.9125	0.8375	0.88	0.764904	0.677252	0.729285	5.08	4.08	4.75	0.12	0.11	0.115	29	8.4	3.4	39	Endotherm	1.91		Measured on skull on Skullsite	Calculated from ratio against CBL Measured on photograph of another specimen		Morrison, P. 1962. Modification of body temperature by activity in Brazilian hummingbirds.Condor64: 315–323.	.
Thalurania	furcata	MNHN 2000-463	Aves	Basal Landbirds	1.205	0.785	1.115	0.71	1.06	0.9	0.19	0.16	0.19	0.995	0.9125	0.98	0.75869	0.771053	0.528302	5.76	4.5	5.17	0.095	0.08	0.095	29.37	8.9	4.3	39.6	Endotherm	1.91		Measured on specimen (scan)	Measured on specimen (scan)	Taken as average from http://animaldiversity.ummz.umich.edu/accounts/Selasphorus_rufus/	McNab, B. 1966. An Analysis of the Body Temperatures of Birds. The Condor, 68:47-55.	.
Steatornis	caripensis	NHMUK S/1869.6.20.1	Aves	Basal Landbirds	3.515	2.19	2.54	2.005	2.695	1.875	0.57	0.62	0.67	2.8525	2.2725	2.285	0.782187	0.613918	0.718301	15.01	10.43	10.3	0.285	0.31	0.335	64	37.1	490	39.3	Endotherm	1.91		Measured on specimen (scan)	Calculated from ratio against CBL Measured on photograph of another specimen	O’Gorman EJ, Hone DWE (2012) Body Size Distribution of the Dinosaurs. PLoS ONE 7(12): e51925. doi:10.1371/journal.pone.0051925 Average of male and female	Thomas, D.W., Bosque, C., and Arends, A. 1993. Development ofthermoregulation and the energetics of oilbirds (Steatorniscaripensis). Physiol. Zool. 66: 322–348.	.
Podargus	strigoides	NHMUK S/1969.4.41	Aves	Basal Landbirds	4.21	3.05	3.06	2.51	3.375	2.29	0.59	0.55	0.56	3.63	2.785	2.8325	0.689311	0.571989	0.734583	19.43	13.29	14.85	0.295	0.275	0.28	78	42.6	350	37.8	Endotherm	1.91		Measured on specimen (scan)	Calculated from ratio against CBL Measured on photograph of another specimen	Pike and Maitland 2004. Scaling of bird claws. Journal of Zoology 262: 73-81	Bech, C. & Nicol, S. C. (1999). Thermoregulation and ventilation in the tawny frogmouth, Podargus strigoides: a low‐metabolic avian species. Australian Journal of Zoology 47, 143– 153.	.
Caprimulgus	europaeus	NMS Z. unvouchered, cat. num. 27	Aves	Basal Landbirds	2.57	1.505	1.9	1.335	2.245	1.405	0.65	0.61	0.73	2.0375	1.6175	1.825	0.810598	0.711554	0.779955	10.67	7.67	10.28	0.325	0.305	0.365	40	20.4	71	40.8	Endotherm	1.91		Measured on specimen (scan)	Calculated from ratio against CBL Measured on photograph of another specimen	Taken as average from http://animaldiversity.ummz.umich.edu/accounts/Caprimulgus_europaeus/	Peiponen V. A. (1970) Body temperature fluctuations in the nightjar (Caprimulgus e. europaeus) in light conditions of Southern Finland. Ann. Zool. Fennici 7, 239-250.	.
Columba	palumbus	CEB-130137	Aves	Basal Landbirds	3.47	2.31	2.4	1.73	2.83	1.59	0.55	0.61	0.61	2.89	2.065	2.21	0.746214	0.693108	0.827248	16	9.9	12.3	0.275	0.305	0.305	56	28.5	500	42.2	Endotherm	1.91		Measured on skull on Skullsite	Calculated from ratio against CBL Measured on photograph of another specimen	Welhun, C.V., 1994. Flight speeds of migrating birds: a test of maximum range speed predictions from three aerodynamic equations. Behavioral Ecology, 5(1), pp.1-8.	McNab, B. 1966. An Analysis of the Body Temperatures of Birds. The Condor, 68:47-55.	.
Cuculus	canorus	NMS unvouchered	Aves	Basal Landbirds	2.875	2.415	2.535	1.865	2.95	1.97	0.55	0.64	0.64	2.645	2.2	2.46	0.542586	0.677307	0.744344	14.34	10.94	12.67	0.275	0.32	0.32	45	23	111.6	-	Endotherm	1.91		Measured on specimen (scan)	Calculated from ratio against CBL Measured on photograph of another specimen	Taken as average from http://animaldiversity.ummz.umich.edu/accounts/Cuculus_canorus/	-	.
Grus	grus	MNHN unvouchered	Aves	Basal Landbirds	4.205	2.55	2.955	1.975	2.9	1.92	0.6	0.54	0.6	3.3775	2.465	2.41	0.795144	0.743839	0.749443	17.06	11.24	11.57	0.3	0.27	0.3	177	57.6	5468	40.8	Endotherm	1.91		Measured on specimen (scan)	Calculated from ratio against CBL Measured on photograph of another specimen	Welhun, C.V., 1994. Flight speeds of migrating birds: a test of maximum range speed predictions from three aerodynamic equations. Behavioral Ecology, 5(1), pp.1-8.	McNab, B. 1966. An Analysis of the Body Temperatures of Birds. The Condor, 68:47-55. Temperature data for Grus canadensis	.
Spheniscus	demersus	UF 21341	Aves	Ardeae	4.62	2.33	3.11	1.98	3.05	1.88	0.7	0.78	0.78	3.475	2.545	2.465	0.863512	0.771148	0.787438	17.9	12.1	11.7	0.35	0.39	0.39	112.7	51.3	2960	40.8	Endotherm	1.91		Measured on specimen (scan)	Calculated from ratio against CBL Measured on photograph of another specimen	Symonds MRE, Tattersall GJ (2010) Geographical variation in bill size across bird species provides evidence for Allen’s rule. American Naturalist 176: 188-197. doi:10.1086/653666	Wilson, R.P. & Grémillet, D. (1996) Body temperatures of free‐living African penguins (Spheniscus demersus) and bank cormorants (Phalacrocorax neglectus). Journal of Experimental Biology, 199, 2215– 2223.	.
Pelagodroma	marina	NMS Z.1898.30	Aves	Ardeae	2.01	1.505	1.58	1.08	1.41	1.11	0.31	0.32	0.32	1.7575	1.33	1.26	0.662845	0.729909	0.616654	9.32	6.03	5.71	0.155	0.16	0.16	44	31.3	62	-	Endotherm	1.91		Measured on skull on Skullsite	Calculated from ratio against CBL Measured on photograph of another specimen	O’Gorman EJ, Hone DWE (2012) Body Size Distribution of the Dinosaurs. PLoS ONE 7(12): e51925. doi:10.1371/journal.pone.0051925 Average of male and female	-	.
Diomedea	exulans	NMS Z.1921.143.1630	Aves	Ardeae	9.01	4.99	5.73	3.955	4.575	4.175	1.34	1.45	1.48	7	4.8425	4.375	0.83263	0.723593	0.408924	34.55	23	19.55	0.67	0.725	0.74	252	78	8130	39.6	Endotherm	1.91		Measured on specimen (scan)	Calculated from ratio against CBL Measured on photograph of another specimen	Taken as average from http://animaldiversity.ummz.umich.edu/accounts/Diomedea_exulans/	McNab, B. 1966. An Analysis of the Body Temperatures of Birds. The Condor, 68:47-55.	.
Fulmarus	glacialis	NMS Z.2003.181.2	Aves	Ardeae	4.13	2.875	2.805	2.175	2.82	2.145	0.6	0.71	0.65	3.5025	2.49	2.4825	0.71792	0.631469	0.649176	17.65	10.94	11.62	0.3	0.355	0.325	100	39.6	725	38.7	Endotherm	1.91		Measured on specimen (scan)	Calculated from ratio against CBL Measured on photograph of another specimen	Dunning 2014 CRC Handbook of Avian body masses.	Gabrielsen GW, Mehlum F (1989) Thermoregulation and energetics of Arctic seabirds. In: Bech C, Reinertsen RE (eds) Physiology of cold adaption in birds. Plenum Press, New York, pp 137–145	.
Gavia	immer	NMS unvouchered	Aves	Ardeae	4.755	3.325	3.375	2.85	3.675	2.955	0.68	0.64	0.71	4.04	3.1125	3.315	0.714864	0.535643	0.594519	19	13.19	15.23	0.34	0.32	0.355	164	63.1	3795	-	Endotherm	1.91		Measured on specimen (scan)	Calculated from ratio against CBL Measured on photograph of another specimen	Welhun, C.V., 1994. Flight speeds of migrating birds: a test of maximum range speed predictions from three aerodynamic equations. Behavioral Ecology, 5(1), pp.1-8.	-	.
Ardea	cinerea	NMS Z.2002.64	Aves	Ardeae	3.685	2.92	3.025	2.225	2.92	2.17	0.92	1.08	1.06	3.3025	2.625	2.545	0.61	0.677484	0.669124	15.18	11.96	10.78	0.46	0.54	0.53	205	49.3	790	39.5	Endotherm	1.91		Measured on specimen (scan)	Calculated from ratio against CBL Measured on photograph of another specimen	Taken as average from http://animaldiversity.ummz.umich.edu/accounts/Ardea_cinerea/	McNab, B. 1966. An Analysis of the Body Temperatures of Birds. The Condor, 68:47-55. Temperature data for Ardea herodias	.
Phalacrocorax	harrisi	NHMUK S/1973.1.10	Aves	Ardeae	3.94	2.615	2.9	2.48	3.75	2.27	0.7	0.62	0.7	3.2775	2.69	3.01	0.747994	0.518344	0.795972	16.1	12.19	14.68	0.35	0.31	0.35	162	60.8	4150	39.8	Endotherm	1.91		Measured on specimen (scan)	Calculated from ratio against CBL Measured on photograph of another specimen	O’Gorman EJ, Hone DWE (2012) Body Size Distribution of the Dinosaurs. PLoS ONE 7(12): e51925. doi:10.1371/journal.pone.0051925 Average of male and female	McNab, B. 1966. An Analysis of the Body Temperatures of Birds. The Condor, 68:47-55. Temperature data for Phalacrocorax carbo	.
Fregata	magnificens	NMS Z.2000.111.2	Aves	Ardeae	5.37	3.23	3.41	2.89	3.79	2.885	0.62	0.61	0.65	4.3	3.15	3.3375	0.798881	0.530784	0.648501	21.75	15.28	16.4	0.31	0.305	0.325	178	49.9	1587.5	-	Endotherm	1.91		Measured on specimen (scan)	Calculated from ratio against CBL Measured on photograph of another specimen	Taken as average from http://animaldiversity.ummz.umich.edu/accounts/Fregata_magnificens/	-	.
Phaethon	lepturus	NHMUK S/1884.2.29.10	Aves	Ardeae	4.25	2.66	2.635	2.045	3.115	3.06	0.71	0.69	0.68	3.455	2.34	3.0875	0.779917	0.630621	0.187086	17.57	10.85	14.16	0.355	0.345	0.34	98	41.2	330	39.27	Endotherm	1.91		Measured on specimen (scan)	Calculated from ratio against CBL Measured on photograph of another specimen	O’Gorman EJ, Hone DWE (2012) Body Size Distribution of the Dinosaurs. PLoS ONE 7(12): e51925. doi:10.1371/journal.pone.0051925 Average of male and female	Hart et al., 2016 L.A. Hart, C.T. Downs, M. Brown Hot footing eggs: thermal imaging reveals foot mediated incubation in white-tailed tropicbirds, Phaethon lepturus J. Ornithol., 157 (2016), pp. 635-640	.
Balaeniceps	rex	NMS unvouchered	Aves	Ardeae	6.51	4.53	4.885	4.195	5.425	4.22	1.45	1.54	1.57	5.52	4.54	4.8225	0.718185	0.512393	0.628413	25.95	19.03	22.92	0.725	0.77	0.785	250	80.5	6300	-	Endotherm	1.91		Measured on specimen (scan)	Calculated from ratio against CBL Measured on photograph of another specimen	O’Gorman EJ, Hone DWE (2012) Body Size Distribution of the Dinosaurs. PLoS ONE 7(12): e51925. doi:10.1371/journal.pone.0051925 Average of male and female	-	.
Ciconia	ciconia	NHMUK 1859.9.6.393	Aves	Ardeae	5.87	3.09	3.7	2.67	3.63	2.63	0.79	0.81	0.8	4.48	3.185	3.13	0.850234	0.692288	0.689256	21.1	14.7	12.1	0.395	0.405	0.4	223	48.2	8000	40.5	Endotherm	1.91		Measured on specimen (scan)	Calculated from ratio against CBL Measured on photograph of another specimen	Taken as average from http://animaldiversity.ummz.umich.edu/accounts/Ciconia_ciconia/	Tortosa, F. S. and Castro, F.. 2003. Development of thermoregulatory ability during ontogeny in the white stork Ciconia ciconia. Ardeola 50: 39– 45.	.
Ciconia	nigra	NHMUK S/1952.1.103	Aves	Ardeae	5.4	3.19	3.31	2.54	3.98	2.53	0.81	0.79	0.78	4.295	2.925	3.255	0.806861	0.641203	0.771954	19.4	14.3	16.1	0.405	0.395	0.39	226	44.4	3000	-	Endotherm	1.91		Measured on specimen (scan)	Calculated from ratio against CBL Measured on photograph of another specimen	Taken as average from http://animaldiversity.ummz.umich.edu/accounts/Ciconia_nigra/	-	.
Phoenicopterus	ruber	NMS Z.2000.193.1	Aves	Mirandornithes	4.08	2.51	2.705	2.005	2.52	2.045	0.59	0.64	0.66	3.295	2.355	2.2825	0.788374	0.671262	0.584341	16.42	9.87	10.69	0.295	0.32	0.33	160	49	3380	40.2	Endotherm	1.91		Measured on specimen (scan)	Calculated from ratio against CBL Measured on photograph of another specimen	Dunning 2014 CRC Handbook of Avian body masses.	McNab, B. 1966. An Analysis of the Body Temperatures of Birds. The Condor, 68:47-55. Temperature data for Phoenicopterus antiquorum	.
Podiceps	cristatus	NMS Z.1990.74	Aves	Mirandornithes	3.135	2.165	2.45	1.775	2.51	1.93	0.6	0.62	0.56	2.65	2.1125	2.22	0.723246	0.689286	0.63934	13.29	9.33	10.12	0.3	0.31	0.28	97	34.5	730	40.2	Endotherm	1.91		Measured on specimen (scan)	Calculated from ratio against CBL Measured on photograph of another specimen	Taken from https://eol.org/pages/45513833/data	McNab, B. 1966. An Analysis of the Body Temperatures of Birds. The Condor, 68:47-55. Temperature data for Podiceps caspicus	.
Haematopus	ostralegus	NMS Z.1998.7.3	Aves	Basal Landbirds	3.845	2.47	2.76	1.545	2.605	1.88	0.52	0.51	0.58	3.1575	2.1525	2.2425	0.766376	0.82864	0.692217	16.16	9.78	11.5	0.26	0.255	0.29	104	27.4	544	-	Endotherm	1.91		Measured on specimen (scan)	Calculated from ratio against CBL Measured on photograph of another specimen	Welhun, C.V., 1994. Flight speeds of migrating birds: a test of maximum range speed predictions from three aerodynamic equations. Behavioral Ecology, 5(1), pp.1-8.	-	.
Scolopax	rusticola	NMS Z.1939.30.6	Aves	Basal Landbirds	3.76	2.76	2.725	1.72	3.075	2.02	0.62	0.59	0.61	3.26	2.2225	2.5475	0.679103	0.775626	0.753969	18.19	10.64	12.71	0.31	0.295	0.305	107	20.7	415	-	Endotherm	1.91		Measured on specimen (scan)	Calculated from ratio against CBL Measured on photograph of another specimen	Taken as average from https://eol.org/terms/search_results?tq%5Bc%5D=45509170&tq%5Bf%5D%5B0%5D%5Bp%5D=260&tq%5Bf%5D%5B0%5D%5Bps%5D%5B%5D%5Bt%5D=predicate&tq%5Bf%5D%5B0%5D%5Bps%5D%5B%5D%5Bp%5D=260&tq%5Bf%5D%5B0%5D%5Brp%5D=260&tq%5Bf%5D%5B0%5D%5Bu%5D=924&tq%5Br%5D=record	-	.
Actitis	hypoleucos	NMS Z.1931.43	Aves	Basal Landbirds	1.89	1.505	1.62	1.03	1.85	0.985	0.39	0.34	0.38	1.6975	1.325	1.4175	0.604907	0.771852	0.846473	9.23	6.92	7.95	0.195	0.17	0.19	48	17.5	40	-	Endotherm	1.91		Measured on specimen (scan)	Calculated from ratio against CBL Measured on photograph of another specimen	Taken as average from https://animaldiversity.org/accounts/Actitis_hypoleucos/	-	.
Alca	torda	NMS Z.2000.08.105	Aves	Basal Landbirds	3.765	2.955	2.595	1.75	2.665	1.97	0.49	0.49	0.47	3.36	2.1725	2.3175	0.619672	0.73839	0.673473	18.09	10.95	11.41	0.245	0.245	0.235	92	38.2	617.5	40	Endotherm	1.91		Measured on specimen (scan)	Calculated from ratio against CBL Measured on photograph of another specimen	Taken as average from http://animaldiversity.ummz.umich.edu/accounts/Alca_torda/	Bergtold, William Harry. A Study of the Incubation Periods of Birds; What Determines Their Lengths,. Denver, Col.: Kendrick-Bellamy, 1917.	.
Gelochelidon	nilotica	NMS unvouchered	Aves	Basal Landbirds	2.885	2.44	2.08	1.36	2.05	1.33	0.48	0.47	0.53	2.6625	1.72	1.69	0.533573	0.756628	0.760976	13.98	8.7	8.21	0.24	0.235	0.265	84	30.9	292	-	Endotherm	1.91		Measured on specimen (scan)	Calculated from ratio against CBL Measured on photograph of another specimen	O’Gorman EJ, Hone DWE (2012) Body Size Distribution of the Dinosaurs. PLoS ONE 7(12): e51925. doi:10.1371/journal.pone.0051925 Average of male and female	-	.
Creagrus	furcatus	NHMUK S/1967.19.6	Aves	Basal Landbirds	4.13	3.65	2.7	2.165	3.045	2.135	0.74	0.72	0.83	3.89	2.4325	2.59	0.467908	0.597523	0.713014	20.38	11.87	13.25	0.37	0.36	0.415	107	41.2	687	40.25	Endotherm	1.91		Measured on specimen (scan)	Calculated from ratio against CBL Measured on photograph of another specimen	Symonds MRE, Tattersall GJ (2010) Geographical variation in bill size across bird species provides evidence for Allen’s rule. American Naturalist 176: 188-197. doi:10.1086/653666	Carlos A Valle, Catalina Ulloa, Cristina Regalado, Juan-Pablo Muñoz-Pérez, Juan Garcia, Britta Denise Hardesty, Alice Skehel, Diane Deresienski, Ronald K Passingham, Gregory A Lewbart, Baseline haematology, biochemistry, blood gas values and health status of the Galapagos swallow-tailed gull (Creagrus furcatus), Conservation Physiology, Volume 8, Issue 1, 2020	.
Larus	argentatus	NMS unvouchered	Aves	Basal Landbirds	4.11	2.8	2.58	1.98	2.59	1.755	0.51	0.55	0.62	3.455	2.28	2.1725	0.732037	0.641119	0.735425	17.85	10.09	10.17	0.255	0.275	0.31	124	46	1177	41.66	Endotherm	1.91		Measured on specimen (scan)	Calculated from ratio against CBL Measured on photograph of another specimen	Dunning 2014 CRC Handbook of Avian body masses.	Bergtold, William Harry. A Study of the Incubation Periods of Birds; What Determines Their Lengths,. Denver, Col.: Kendrick-Bellamy, 1917.	.
Opisthocomus	hoazin	NHMUK S/1892.7.11.1	Aves	Basal Landbirds	3.16	1.72	2.08	1.625	2.455	1.82	0.59	0.64	0.7	2.44	1.8525	2.1375	0.838888	0.624218	0.671125	11.6	7.89	10.21	0.295	0.32	0.35	58	35.4	696	38.5	Endotherm	1.91		Measured on specimen (scan)	Calculated from ratio against CBL Measured on photograph of another specimen	O’Gorman EJ, Hone DWE (2012) Body Size Distribution of the Dinosaurs. PLoS ONE 7(12): e51925. doi:10.1371/journal.pone.0051925 Average of male and female	Grajal, A., 1991. Nutritional ecology and digestive physiology of the hoatzin, Opisthocomus hoazin, a folivorous bird with foregut fermentation. PhD Dissertation, University of Florida, Gainesville, FL.	.
Athene	cunicularia	NHMUK S/1986.75.13	Aves	Afroaves	3.9	1.96	3.03	1.94	2.89	2.56	0.63	0.66	0.71	2.93	2.485	2.725	0.86454	0.768155	0.464042	16.2	13.5	13.8	0.315	0.33	0.355	50	34.7	150	39.6	Endotherm	1.91		Measured on specimen (scan)	Calculated from ratio against CBL Measured on photograph of another specimen	Taken as average from https://eol.org/terms/search_results?tq%5Bc%5D=45510745&tq%5Bf%5D%5B0%5D%5Bp%5D=260&tq%5Bf%5D%5B0%5D%5Bps%5D%5B%5D%5Bt%5D=predicate&tq%5Bf%5D%5B0%5D%5Bps%5D%5B%5D%5Bp%5D=260&tq%5Bf%5D%5B0%5D%5Brp%5D=260&tq%5Bf%5D%5B0%5D%5Bu%5D=924&tq%5Br%5D=record	Kilgore, D. L., Boggs, D. F., Kilgore, T. J., Colby, C., Williams, B. R. and Bavis, R. W. (2007). Ventilatory and metabolic responses of burrowing owls, Athene cunicularia, to moderate and extreme hypoxia: analysis of the hypoxic ventilatory threshold vs. hemoglobin oxygen affinity relationship in birds. Comp. Biochem. Physiol. A doi:10.1016/j.cbpa.2007.04.014.	.
Tyto	alba	NHMUK S/1981.39.1	Aves	Afroaves	3.36	2.22	2.77	1.75	2.55	1.71	0.64	0.55	0.6	2.79	2.26	2.13	0.750637	0.775157	0.74183	13.1	10.9	10.9	0.32	0.275	0.3	70	32.4	300	38.4	Endotherm	1.91		Measured on specimen (scan)	Calculated from ratio against CBL Measured on photograph of another specimen	Pike and Maitland 2004. Scaling of bird claws. Journal of Zoology 262: 73-81	Mama KR, Phillips LG, Pascoe PJ: Use of propofol forinduction and maintenance of anesthesia in a barnowl (Tyto alba) undergoing tracheal resection. J ZooWildl Med 27:397-401, 1996	.
Alcedo	atthis	NMS unvouchered	Aves	Afroaves	1.97	1.6	1.96	1.155	2.02	1.4	0.45	0.48	0.48	1.785	1.5575	1.71	0.583403	0.807925	0.720871	9.67	7.81	8.42	0.225	0.24	0.24	69	21.2	40	-	Endotherm	1.91		Measured on specimen (scan)	Calculated from ratio against CBL Measured on photograph of another specimen	Taken as average from http://animaldiversity.ummz.umich.edu/accounts/Alcedo_atthis/	-	.
Coracias	garrulus	NMS Z.1994.44	Aves	Afroaves	2.79	2.36	2.585	1.75	3.04	1.74	0.6	0.57	0.61	2.575	2.1675	2.39	0.533376	0.735999	0.819997	13.71	11.49	12.97	0.3	0.285	0.305	67	28.5	160	37.99	Endotherm	1.91		Measured on specimen (scan)	Calculated from ratio against CBL Measured on photograph of another specimen	O’Gorman EJ, Hone DWE (2012) Body Size Distribution of the Dinosaurs. PLoS ONE 7(12): e51925. doi:10.1371/journal.pone.0051925 Average of male and female	R. Václav, et al. Ectoparasite load is linked to ontogeny and cell-mediated immunity in an avian host system with pronounced hatching asynchrony Biol. J. Linn. Soc., 94 (3) (2008), pp. 463-473	.
Ramphastos	dicolorus	NMS Z.1931.43_Rhamphastos	Aves	Afroaves	3.035	2.8	2.51	1.73	2.95	1.975	0.55	0.5	0.55	2.9175	2.12	2.4625	0.38583	0.72453	0.74282	14.9	10.55	12.49	0.275	0.25	0.275	130	33.7581	331	39.2	Endotherm	1.91		Measured on specimen (scan)	Calculated from ratio against CBL Measured on photograph of another specimen	Symonds MRE, Tattersall GJ (2010) Geographical variation in bill size across bird species provides evidence for Allen’s rule. American Naturalist 176: 188-197. doi:10.1086/653666	McNab B.K. 2001 Energetics of toucans, barbets and a hornbill: implications for avian frugivory. Auk. 118, 916–933.	.
Pteroglossus	bailloni	MNHN unvouchered	Aves	Afroaves	2.635	2.37	2.405	1.665	2.715	1.95	0.51	0.53	0.52	2.5025	2.035	2.3325	0.437063	0.721602	0.695804	12.93	9.34	11.48	0.255	0.265	0.26	82	24.9	139	40.9	Endotherm	1.91		Measured on skull on Skullsite	Measured on specimen (scan)	de Barros Leite, A., Brancalion, P.H., Guevara, R. and Galetti, M., 2012. Differential seed germination of a keystone palm (Euterpe edulis) dispersed by avian frugivores. Journal of Tropical Ecology, 28(6), pp.615-618.	McNab B.K. 2001 Energetics of toucans, barbets and a hornbill: implications for avian frugivory. Auk. 118, 916–933. Temperature data for Pteroglossus aracari	.
Dendrocopos	medius	CEB-140034	Aves	Afroaves	2.56	1.52	2.1	1.43	2.68	1.77	0.38	0.42	0.44	2.04	1.765	2.225	0.80465	0.732328	0.750872	10.9	9.7	12.1	0.19	0.21	0.22	40.7	17.7	67.5	41.9	Endotherm	1.91		Measured on skull on Skullsite	Calculated from ratio against CBL Measured on photograph of another specimen	Stoessel, A., Kilbourne, B. M., & Fischer, M. S. (2013). Morphological integration versus ecological plasticity in the avian pelvic limb skeleton. Journal of Morphology, 274(5), 483-495.	McNab, B. 1966. An Analysis of the Body Temperatures of Birds. The Condor, 68:47-55.	.
Sagittarius	serpentarius	NMS Z.1931.120.7	Aves	Afroaves	4.09	2.485	2.84	2.265	3.03	2.285	0.65	0.72	0.71	3.2875	2.5525	2.6575	0.794259	0.603272	0.65673	15.33	10.78	12.53	0.325	0.36	0.355	115	69.3	3285	-	Endotherm	1.91		Measured on specimen (scan)	Calculated from ratio against CBL Measured on photograph of another specimen	Taken as average from http://animaldiversity.ummz.umich.edu/accounts/Sagittarius_serpentarius/	-	.
Pandion	haliaetus	NMS Z.1995.35	Aves	Afroaves	5.45	3.83	3.985	2.46	4.255	3.15	0.87	0.87	0.82	4.64	3.2225	3.7025	0.711435	0.786716	0.672271	24.47	16.92	19.47	0.435	0.435	0.41	73	48.4	1528	39	Endotherm	1.91		Measured on specimen (scan)	Calculated from ratio against CBL Measured on photograph of another specimen	Taken as average from http://animaldiversity.ummz.umich.edu/accounts/Pandion_haliaetus/	Wasser J.S. 1986. The relationship of energetics of falconiform birds to body mass and climate. Condor 88:57–62.	.
Circus	cyaneus	NMS Z.1995.188	Aves	Afroaves	3.755	2.69	2.85	1.975	3.535	2.245	0.66	0.59	0.64	3.2225	2.4125	2.89	0.697712	0.720954	0.772448	16.99	11.37	15.49	0.33	0.295	0.32	64	42.3	504	-	Endotherm	1.91		Measured on specimen (scan)	Calculated from ratio against CBL Measured on photograph of another specimen	Pike and Maitland 2004. Scaling of bird claws. Journal of Zoology 262: 73-81	-	.
Aquila	chrysaetos	NMS Z.1997.29	Aves	Afroaves	6.76	5.62	5.97	3.895	5.445	4.345	1.63	1.69	1.63	6.19	4.9325	4.895	0.555733	0.75785	0.602684	32.42	24.51	26.46	0.815	0.845	0.815	122	73.6	4752.5	38.6	Endotherm	1.91		Measured on specimen (scan)	Calculated from ratio against CBL Measured on photograph of another specimen	Pike and Maitland 2004. Scaling of bird claws. Journal of Zoology 262: 73-81	Steven Rudeen and Leon R. Powers Body Temperature of a Nestling Golden Eagle The Condor Vol. 80, No. 4 (Winter, 1978), pp. 447-449	.
Buteo	buteo	NHMUK S/2007.139.12	Aves	Afroaves	5.47	3.38	4.97	3.12	5.01	3.09	1.16	1.12	1.07	4.425	4.045	4.05	0.786244	0.778402	0.787146	23.2	19.7	22	0.58	0.56	0.535	75	47	890	41.1	Endotherm	1.91		Measured on specimen (scan)	Calculated from ratio against CBL Measured on photograph of another specimen	Pike and Maitland 2004. Scaling of bird claws. Journal of Zoology 262: 73-81	Kilic N, Pasa S. Cardiopulmonary effects of propofol compared with those of a medetomidine-ketamine combination in the common buzzards (Buteo buteo) Rev. Med. Vet. 2009;160(3):154–159. Cloacal baseline body temperature	.
Vultur	gryphus	NMS Z.1879.8.38	Aves	Afroaves	7.02	3.805	4.79	3.48	4.515	3.415	1.14	1.01	1.14	5.4125	4.135	3.965	0.840364	0.687152	0.654147	27.39	17.62	18.51	0.57	0.505	0.57	165	75	10800	-	Endotherm	1.91		Measured on specimen (scan)	Calculated from ratio against CBL Measured on photograph of another specimen	Taken as average from http://animaldiversity.ummz.umich.edu/accounts/Vultur_gryphus/	-	.
Falco	subbuteo	CEB-140011	Aves	Australaves	3.786	2.4865	3.1115	2.1445	3.396	2.4415	0.734	0.786	0.838	3.13625	2.628	2.91875	0.754098	0.724555	0.695078	16.637	12.925	15.321	0.367	0.393	0.419	48	33.1	235	40.5	Endotherm	1.91		Measured on skull on Skullsite	Calculated from ratio against CBL Measured on photograph of another specimen	Pike and Maitland 2004. Scaling of bird claws. Journal of Zoology 262: 73-81	McNab, B. 1966. An Analysis of the Body Temperatures of Birds. The Condor, 68:47-55.	.
Melopsittacus	undulatus	CEB-140012	Aves	Australaves	1.7285	1.0975	1.4905	1.0285	1.779	1.129	0.3294	0.3352	0.3066	1.413	1.2595	1.454	0.772558	0.723774	0.772819	5.515	5.323	7.325	0.1647	0.1676	0.1533	23.3	15.3	29	41.7	Endotherm	1.91		Measured on skull on Skullsite	Calculated from ratio against CBL Measured on photograph of another specimen	O’Gorman EJ, Hone DWE (2012) Body Size Distribution of the Dinosaurs. PLoS ONE 7(12): e51925. doi:10.1371/journal.pone.0051925 Average of male and female	Weathers, W. & Schoenbaechler, D. 1976. Regulation of body temperature in the Budherygah, Melopsittacus undulatus. Australian Journal of Zoology, 24:39-47.	.
Ara	macao	NMS Z.1931.43_Ara	Aves	Australaves	3.06	2.49	2.99	2.195	2.565	2.05	0.72	0.75	0.79	2.775	2.5925	2.3075	0.581249	0.679027	0.601038	9.42	10.36	10.69	0.36	0.375	0.395	90	58.1	1015	-	Endotherm	1.91		Measured on specimen (scan)	Calculated from ratio against CBL Measured on photograph of another specimen	O’Gorman EJ, Hone DWE (2012) Body Size Distribution of the Dinosaurs. PLoS ONE 7(12): e51925. doi:10.1371/journal.pone.0051925 Average of male and female	-	.
Psittacus	erithacus	NHMUK S/1973.66.109	Aves	Australaves	3.46	1.96	2.77	1.97	3.05	1.97	0.49	0.5	0.52	2.71	2.37	2.51	0.82408	0.702998	0.763421	11.1	11.4	12.8	0.245	0.25	0.26	60.8	36	407	-	Endotherm	1.91		Measured on specimen (scan)	Calculated from ratio against CBL Measured on photograph of another specimen	Taken as average from http://animaldiversity.ummz.umich.edu/accounts/Psittacus_erithacus/	-	.
Dicrurus	paradiseus	NHMUK S/1969.1.163	Aves	Australaves	2.815	2.205	2.2	1.41	2.645	2	0.46	0.46	0.58	2.51	1.805	2.3225	0.621639	0.767617	0.654406	13.98	8.9	12.42	0.23	0.23	0.29	56.5	31.9	100	-	Endotherm	1.91		Measured on specimen (scan)	Calculated from ratio against CBL Measured on photograph of another specimen	Taken as average from http://animaldiversity.ummz.umich.edu/accounts/Dicrurus_paradiseus/	-	.
Corvus	corax	NHMUK S/1979.66.160	Aves	Australaves	4.933	3.0505	3.1915	2.9995	4.243	3.679	0.669	0.709	0.684	3.99175	3.0955	3.961	0.785874	0.341614	0.498177	22.476	13.678	22.273	0.3345	0.3545	0.342	112.3	49.5	1250	39.2	Endotherm	1.91		Measured on specimen	Calculated from ratio against CBL Measured on photograph of another specimen	Pike and Maitland 2004. Scaling of bird claws. Journal of Zoology 262: 73-81	Anufriev AI, Solomonov NG, Isayev AP et al (2008) Changes in the body temperature during the annual cycle and metabolic rate in the raven Corvus corax at winter ambient temperatures. Dokl Biol Sci 422:339–341. Annual average body temperature	.
Taeniopygia	guttata	NHMUK S/2002.46.1	Aves	Australaves	1.74	1.01	1.22	0.79	1.61	0.89	0.25	0.24	0.27	1.375	1.005	1.25	0.814289	0.762031	0.833317	7.4	5	7.3	0.125	0.12	0.135	17.7	12.4	10	40.2	Endotherm	1.91		Measured on specimen	Calculated from ratio against CBL Measured on photograph of another specimen	Dunning 2014 CRC Handbook of Avian body masses.	McNab, B. 1966. An Analysis of the Body Temperatures of Birds. The Condor, 68:47-55.	.
Passer	domesticus	CEB-130050	Aves	Australaves	1.81	1.38	1.39	0.88	1.87	1.18	0.32	0.26	0.39	1.595	1.135	1.525	0.64707	0.774075	0.77577	7.2	4.8	7.7	0.16	0.13	0.195	29	16.8	23	43.5	Endotherm	1.91		Measured on specimen	Calculated from ratio against CBL Measured on photograph of another specimen	Measured on specimen	McNab, B. 1966. An Analysis of the Body Temperatures of Birds. The Condor, 68:47-55.	.
Carduelis	chloris	CEB-130130	Aves	Australaves	1.75	1.43	1.18	1.05	1.81	1.09	0.33	0.46	0.43	1.59	1.115	1.45	0.576435	0.456291	0.798338	8	5.672	8.2	0.165	0.23	0.215	29	17.5	30.8	41.5	Endotherm	1.91		Measured on specimen	Calculated from ratio against CBL Measured on photograph of another specimen	Ekman, J. & Hake, M. 1990. Monitoring starvation risk: adjustments of body reserves in greenfinches (Carduelis chloris L.) during periods of unpredictable foraging succes. Behavioral Ecology, 1:62-67.	Saarela, S., B. Klapper, and G. Heldmaier. 1991. Seasonal changes in circadian rhythm of thermoregulation in Greenfinches and Siskins at different ambient temperatures. D. 573-579. In E. Riklis [ed.], Photobiology. Plenum Press, New York.	.
Bangsia	arcaei	MNHN unvouchered	Aves	Australaves	2.175	1.515	1.605	1.055	1.95	1.47	0.38	0.37	0.38	1.845	1.33	1.71	0.717507	0.753611	0.657051	9.91	5.89	9.28	0.19	0.185	0.19	29.83	18.7	39.9	-	Endotherm	1.91		Measured on specimen	Measured on specimen (scan)	O’Gorman EJ, Hone DWE (2012) Body Size Distribution of the Dinosaurs. PLoS ONE 7(12): e51925. doi:10.1371/journal.pone.0051925 Average of male and female	-	.
Hirundo	rustica	CEB-140010	Aves	Australaves	1.939	1.344	1.31	0.886	1.824	1.2485	0.35	0.35	0.35	1.6415	1.098	1.53625	0.720802	0.736593	0.729027	8.73	4.91	8.55	0.175	0.175	0.175	30	16.5	17.5	41.2	Endotherm	1.91		Measured on specimen	Calculated from ratio against CBL Measured on photograph of another specimen	Dunning 2014 CRC Handbook of Avian body masses.	Moller AP. Body temperature and fever in a free-living bird. Comp Biochem Physiol B Biochem Mol Biol. 2010;156(1):68–74. Annual average body temperature	.
Regulus	regulus	NHM Unregistered Palaeontology Comparative Collection (6)9	Aves	Australaves	1.445	0.9	0.995	0.605	1.355	0.705	0.252	0.25	0.27	1.1725	0.8	1.03	0.782351	0.793906	0.853986	7.03	3.52	6.05	0.126	0.125	0.135	22	11.3	5.8	-	Endotherm	1.91		Measured on specimen (scan)	Calculated from ratio against CBL Measured on photograph of another specimen	Taken from http://genomics.senescence.info/species/entry.php?species=Regulus_regulus	-	.
Luscinia	megarhynchos	NHMUK S/1968.4.14	Aves	Australaves	2.305	1.52	1.57	1.06	2.025	1.255	0.34	0.35	0.39	1.9125	1.315	1.64	0.751761	0.737672	0.784797	10.75	6.28	8.99	0.17	0.175	0.195	30.5	16	21	-	Endotherm	1.91		Measured on specimen	Calculated from ratio against CBL Measured on photograph of another specimen	Taken as average from http://animaldiversity.ummz.umich.edu/accounts/Luscinia_megarhynchos/	-	.
Turdus	merula	CEB-130075	Aves	Australaves	2.5	1.89	2.07	1.43	2.41	1.68	0.43	0.46	0.42	2.195	1.75	2.045	0.654572	0.723026	0.716978	12.8	8.7	11.1	0.215	0.23	0.21	46.3	21.9	100	43.2	Endotherm	1.91		Measured on skull on Skullsite	Calculated from ratio against CBL Measured on photograph of another specimen	Macleod, R., Barnett, P., Clark, J. A. & Cresswell, W. 2005. Body mass change strategies in blackbirds Turdus merula: the starvation-predation risk trade-off. Journal of Animal Ecology, 74:292-302.	McNab, B. 1966. An Analysis of the Body Temperatures of Birds. The Condor, 68:47-55.	.
Sphenodon	punctatus	Average (YPM 9194, LDUCZ x036)	Lepidosauria	Rhynchocephalia	3.1185	1.8705	2.61225	1.63675	3.14925	2.52175	0.591	0.4775	0.6345	2.4945	2.1245	2.8355	0.800144	0.779367	0.599004	8.8525	8.696	11.7335	0.2955	0.23875	0.31725	46.1	35.7	454	15	Ectotherm	1.19		Average of specimens	Calculated from ratio against CBL Measured on photograph of another specimen	O’Gorman EJ, Hone DWE (2012) Body Size Distribution of the Dinosaurs. PLoS ONE 7(12): e51925. doi:10.1371/journal.pone.0051925 Average of male and female	H Saint Girons, B.D Bell, D.G Newman Observations on the activity and thermoregulation of the tuatara, Sphenodon punctatus (Reptilia : Rhynchocephalia), on Stephens Island New Zealand J. Zool., 7 (1980), pp. 551-556 Night average; but they still bask during the day	.
-	-	YPM 9194	Lepidosauria	Rhynchocephalia	2.779	1.799	2.3025	1.443	2.6875	2.1565	0.611	0.45	0.667	2.289	1.87275	2.422	0.762188	0.779252	0.596762	7.768	8.112	10.848	0.3055	0.225	0.3335	53.1	-	-	-	-	-		Measured on specimen (scan)	-	-	-
-	-	LDUCZ x036	Lepidosauria	Rhynchocephalia	3.458	1.942	2.922	1.8305	3.611	2.887	0.571	0.505	0.602	2.7	2.37625	3.249	0.827411	0.779458	0.600664	9.937	9.28	12.619	0.2855	0.2525	0.301	39.1	-	-	-	-	-		Measured on specimen (scan)	-	-	-
Delma	borea	USNM 128679	Lepidosauria	Gekkota	0.6885	0.296	0.636	0.3235	0.6525	0.397	0.12	0.119	0.14	0.49225	0.47975	0.52475	0.902867	0.860975	0.793608	1.832	1.83	2.084	0.06	0.0595	0.07	9.2	6.8	5.23	-	Ectotherm	1.19		Measured on specimen (scan)	Calculated from ratio against CBL Measured on photograph of another specimen	Measured on Delma tincta specimens FMNH 97148, FMNH 97151, FMNH 97152, average scaled using CBLs (square root of body mass was used for scaling)	-	.
Nephrurus	levis	YPM 12868	Lepidosauria	Gekkota	1.647	0.588	1.228	0.6295	1.5195	0.7825	0.328	0.368	0.307	1.1175	0.92875	1.151	0.9341	0.858614	0.857207	4.21	3.42	3.855	0.164	0.184	0.1535	22	15.4	11	28.2	Ectotherm	1.19		Measured on specimen (scan)	Calculated from ratio against CBL Measured on photograph of another specimen	Meiri, S. 2010. Length-weight allometries in lizards. Journal of Zoology, 281:218-224	Hays, Brenton J; Bidwell, Joseph R and Dittmer, Drew E. An assessment of thermal preference of two species of Knob-tailed Geckos, 'Nephrurus levis' and 'N. laevissimus', at Uluru Kata-Tjuta National Park [online]. Northern Territory Naturalist, Vol. 29, Oct 2019: [40]-53. Night average; but they still bask during the day	.
Hemitheconyx	caudicinctus	YPM 14381	Lepidosauria	Gekkota	2.3865	0.8565	2.02	1.0675	2.021	1.178	0.398	0.397	0.433	1.6215	1.54375	1.5995	0.933378	0.848955	0.812558	6.164	5.995	6.93	0.199	0.1985	0.2165	29	20.2	44	25.8	Ectotherm	1.19		Measured on specimen (scan)	Calculated from ratio against CBL Measured on photograph of another specimen	Meiri, S., 2010. Length–weight allometries in lizards. Journal of Zoology, 281(3), pp.218-226.	Dial, B. E. y L. L. Grismer. 1992. A phylogenetic analysis of physiological-ecological character evolution in the lizard genus Coleonyx and its implications for historical biogeographic reconstruction. Systematic Biology 41: 178-195.	.
Eublepharis	macularius	CMNH 67524	Lepidosauria	Gekkota	1.92	0.77	1.64	0.96	1.73	1.09	0.35	0.28	0.3	1.345	1.3	1.41	0.91606	0.810769	0.776548	4.2	4.4	4.5	0.175	0.14	0.15	24.1	17.5	59.7	26.5	Ectotherm	1.19		Measured on specimen (scan)	Calculated from ratio against CBL Measured on photograph of another specimen	Meiri, S., 2010. Length–weight allometries in lizards. Journal of Zoology, 281(3), pp.218-226.	Dial, B. E. y L. L. Grismer. 1992. A phylogenetic analysis of physiological-ecological character evolution in the lizard genus Coleonyx and its implications for historical biogeographic reconstruction. Systematic Biology 41: 178-195.	.
Teratoscincus	przewalskii	CAS 171013	Lepidosauria	Gekkota	1.9905	0.808	1.6865	1.0445	1.7465	1.2965	0.336	0.309	0.308	1.39925	1.3655	1.5215	0.913905	0.785131	0.670021	5.657	5.377	6.046	0.168	0.1545	0.154	22.9	16.4	18.5	15.3	Ectotherm	1.19		Measured on specimen (scan)	Calculated from ratio against CBL Measured on photograph of another specimen	O’Gorman EJ, Hone DWE (2012) Body Size Distribution of the Dinosaurs. PLoS ONE 7(12): e51925. doi:10.1371/journal.pone.0051925 Average of male and female	Autumn, K., Weinstein, R.B., Full, R.J., 1994. Low cost of locomotion increases performance at low temperature in a nocturnal lizard. Physiol. Zool. 67, 238–262	.
Ptyodactylus	hasselquistii	NHMUK 1900.9.22.15	Lepidosauria	Gekkota	1.65	0.62	1.28	0.67	1.38	0.78	0.23	0.25	0.23	1.135	0.975	1.08	0.926718	0.852064	0.824942	4.9	4.1	3.3	0.115	0.125	0.115	20.5	13.4	9.3	28.5	Ectotherm	1.19		Measured on specimen (scan)	Calculated from ratio against CBL Measured on photograph of another specimen	Measured on FMNH 11874, scaled using CBLs (square root of body mass was used for scaling)	Werner YL, Goldblatt A. Body temperature in a basking gekkonid lizard, Ptyodactylus hasselquistii (Reptilia, Lacertilia, Gekkonidae). J Herpetol. 1978;12:408–11.	.
Gekko	gecko	FMNH 186818	Lepidosauria	Gekkota	2.772	1.118	2.3325	1.3225	2.4055	1.5835	0.401	0.356	0.382	1.945	1.8275	1.9945	0.915059	0.823726	0.75277	7.156	6.568	7.827	0.2005	0.178	0.191	44.6	31.3	63.2	27.5	Ectotherm	1.19		Measured on specimen (scan)	Calculated from ratio against CBL Measured on photograph of another specimen	Meiri, S., 2010. Length–weight allometries in lizards. Journal of Zoology, 281(3), pp.218-226.	Sievert LM, Hutchison VH (1988) Light versus heat: thermoregulatory behaviour in a nocturnal lizard Gekko gecko. Herpetologica 44:266–273	.
Gymnodactylus	geckoides	NHMUK 1978.346	Lepidosauria	Gekkota	1.41	0.55	1.12	0.57	1.19	0.69	0.2	0.19	0.2	0.98	0.845	0.94	0.920785	0.860809	0.814736	3.3	3	2.8	0.1	0.095	0.1	12.3	8.9	2.2	30.2	Ectotherm	1.19		Measured on specimen (scan)	Calculated from ratio against CBL Measured on photograph of another specimen	Meiri, S., 2010. Length–weight allometries in lizards. Journal of Zoology, 281(3), pp.218-226.	Algar, A. C., Morley, K., & Boyd, D. S. (2018). Remote sensing restores predictability of ectotherm body temperature in the world’s forests. Global Ecology and Biogeography, 27, 1412– 1425.	.
Smaug	warreni mossambicus	YPM 12670	Lepidosauria	Scincomorpha	2.1205	0.987	1.8115	1.1145	1.9635	1.5075	0.343	0.31	0.362	1.55375	1.463	1.7355	0.885071	0.788343	0.640736	5.915	6.119	7.45	0.1715	0.155	0.181	28.1	19.5	43.4	28.5	Ectotherm	1.19		Measured on specimen (scan)	Calculated from ratio against CBL Measured on photograph of another specimen	Meiri, S. 2010. Length-weight allometries in lizards. Journal of Zoology, 281:218-224 Average of all Cordylus species	Taken from http://www.reptile-care.de/species/Scincoidea/Cordylidae/Smaug-depressus.html Average of lower temperature and spot temperature.	.
Lepidophyma	smithii	LACM 136359	Lepidosauria	Scincomorpha	1.594	0.772	1.415	0.8825	1.7465	1.148	0.261	0.244	0.213	1.183	1.14875	1.44725	0.874893	0.781684	0.753616	3.786	4.404	6.179	0.1305	0.122	0.1065	19.2	13.7	25	29.1	Ectotherm	1.19		Measured on specimen (scan)	Calculated from ratio against CBL Measured on photograph of another specimen	Meiri, S. 2010. Length-weight allometries in lizards. Journal of Zoology, 281:218-225	Arenas-Moreno DM, Santos-Bibiano R, Muñoz-Nolasco FJ, Charruau P, Méndez-De La Cruz FR. Thermal ecology and activity patterns of six species of tropical night lizards (Squamata: Xantusiidae: Lepidophyma) from Mexico. J Therm Biol. 2018;75:97-105.	.
Cricosaura	typica	USNM 547842	Lepidosauria	Scincomorpha	0.817	0.3695	0.694	0.4235	0.753	0.521	0.127	0.142	0.145	0.59325	0.55875	0.637	0.891884	0.792224	0.721994	2.225	2.158	2.552	0.0635	0.071	0.0725	8.2	6	1.2	-	Ectotherm	1.19		Measured on specimen (scan)	Calculated from ratio against CBL Measured on photograph of another specimen	O’Gorman EJ, Hone DWE (2012) Body Size Distribution of the Dinosaurs. PLoS ONE 7(12): e51925. doi:10.1371/journal.pone.0051925 Average of male and female	-	.
Tribolonotus	gracilis	NHMUK 1938.5.7.59	Lepidosauria	Scincomorpha	2.26	0.96	2.03	1.12	2.27	1.31	0.32	0.36	0.33	1.61	1.575	1.79	0.905297	0.834027	0.816679	6.5	6.1	5.9	0.16	0.18	0.165	28.8	20	18	25	Ectotherm	1.19		Measured on specimen (scan)	Calculated from ratio against CBL Measured on photograph of another specimen	Measured on FMNH 178326, scaled using CBLs (square root of body mass was used for scaling)	Taken from https://www.reptilesmagazine.com/red-eyed-crocodile-skink-care-and-information/ Based on requirements to breed in captivity	.
Tiliqua	rugosa	NHMUK 29a	Lepidosauria	Scincomorpha	3	1.09	2.84	1.54	3.23	2.29	0.53	0.56	0.67	2.045	2.19	2.76	0.931659	0.840215	0.70523	8.6	8.9	9.7	0.265	0.28	0.335	48.6	25.4	617	31.9	Ectotherm	1.19		Measured on specimen (scan)	Calculated from ratio against CBL Measured on photograph of another specimen	Meiri, S., 2010. Length–weight allometries in lizards. Journal of Zoology, 281(3), pp.218-226.	Algar, A. C., Morley, K., & Boyd, D. S. (2018). Remote sensing restores predictability of ectotherm body temperature in the world’s forests. Global Ecology and Biogeography, 27, 1412– 1425. Based on Tiliqua scincoides.	.
Eumeces	schneideri	YPM 12668	Lepidosauria	Scincomorpha	2.06	0.83	1.84	0.91	2.01	1.25	0.29	0.32	0.28	1.445	1.375	1.63	0.915238	0.869141	0.783104	5.1	5.1	4.8	0.145	0.16	0.14	31	18.6	85.4	29	Ectotherm	1.19		Measured on specimen (scan)	Measured on specimen (scan)	Meiri, S., 2010. Length–weight allometries in lizards. Journal of Zoology, 281(3), pp.218-226.	Taken from http://thetyedyediguana.com/content/care-sheets/Schneider%27s-skink-eumeces-schneideri-care-sheet.pdf Based on requirements to breed in captivity	.
Feylinia	polylepis	FMNH 120968	Lepidosauria	Scincomorpha	1.349	0.7275	1.17	0.7155	1.328	0.9685	0.202	0.191	0.277	1.03825	0.94275	1.14825	0.842121	0.791215	0.684202	3.309	3.545	4.774	0.101	0.0955	0.1385	10.7	6.8	12	-	Ectotherm	1.19		Measured on specimen (scan)	Calculated from ratio against CBL Measured on photograph of another specimen	Measured on specimen	-	.
Chalcides	ocellatus	YPM 12690	Lepidosauria	Scincomorpha	1.55	0.63	1.17	0.63	1.41	1.07	0.19	0.18	0.18	1.09	0.9	1.24	0.913672	0.84265	0.651248	4.2	3.4	3.9	0.095	0.09	0.09	22	15.4	25	32	Ectotherm	1.19		Measured on specimen (scan)	Calculated from ratio against CBL Measured on photograph of another specimen	Meiri, S., 2010. Length–weight allometries in lizards. Journal of Zoology, 281(3), pp.218-226.	Dauf EF, Andrews RM 1993. The effect of pregnancy on thermoregulatory behavior of the viviparous lizard Chalcides ocellatus. Journal of Herpetology 27: 6–13.	.
Tupinambis	teguixin	FMNH 22416	Lepidosauria	Lacertoidea	3.3785	1.523	2.8295	1.654	2.799	2.1825	0.39	0.359	0.472	2.45075	2.24175	2.49075	0.892629	0.811354	0.6261	10.133	8.039	9.913	0.195	0.1795	0.236	69.8	44.7	1190	33.2	Ectotherm	1.19		Measured on specimen	Calculated from ratio against CBL Measured on photograph of another specimen	Measured on FMNH 10694, scaled using CBLs (square root of body mass was used for scaling)	King D, Green B, Herrera E. Thermoregulation in a large Teiid lizard, Tupinambis teguixin, in Venezuela, Copeia, 1994, vol. 3 (pg. 806-808)	.
Salvator	merianae	FMNH 10694	Lepidosauria	Lacertoidea	4.02	1.73	3.51	1.71	3.2	2.1	0.64	0.53	0.7	2.875	2.61	2.65	0.902663	0.873302	0.754544	11	9.5	8.9	0.32	0.265	0.35	64.8	39.4	1190	27	Ectotherm	1.19		Measured on specimen	Calculated from ratio against CBL Measured on photograph of another specimen	Measured on specimen	Lucas A.Zena Danielle Dillon Kathleen E.Hunt Carlos A.Navas C. Loren Buck Kênia C.Bícego Hormonal correlates of the annual cycle of activity and body temperature in the South-American tegu lizard (Salvator merianae) General and Comparative Endocrinology Volume 285, 1 January 2020, 113295	.
Diplometopon	zarudnyi	FMNH 64429	Lepidosauria	Lacertoidea	1.205	0.575	0.9315	0.601	1.1027	0.880842	0.139	0.138974	0.151	0.89	0.76625	0.991771	0.878806	0.764017	0.601591	3.068	2.438	3.98316	0.0695	0.0694871	0.0755	8.2	6.2	7	31.5	Ectotherm	1.19		Measured on specimen (scan)	Calculated from ratio against CBL Measured on photograph of another specimen	Meiri, S., 2010. Length–weight allometries in lizards. Journal of Zoology, 281(3), pp.218-226.	Seligmann H, Labra A. (2013). Tetracoding increases with body temperature in Lepidosauria. Biosystems 114:155–63.	.
Bipes	biporus	CAS 126478	Lepidosauria	Lacertoidea	0.83	0.39	0.52	0.41	0.61	0.575	0.14	0.16	0.18	0.61	0.465	0.5925	0.882731	0.615084	0.333859	1.9	1.74	2.39	0.07	0.08	0.09	7.2	5.9	5.2	31.9	Ectotherm	1.19		Measured on specimen (scan)	Calculated from ratio against CBL Measured on photograph of another specimen	Meiri, S., 2010. Length–weight allometries in lizards. Journal of Zoology, 281(3), pp.218-226.	FI Valle Jiménez Ecología térmica de Bipes biporus (Squamata: Amphisbaenia) en Baja California Sur 2018-06	.
Lacerta	viridis	YPM 12858	Lepidosauria	Lacertoidea	1.753	0.806	1.4785	0.784	1.423	1.1055	0.248	0.238	0.251	1.2795	1.13125	1.26425	0.888031	0.847831	0.629649	5.003	4.446	5.254	0.124	0.119	0.1255	21.7	15.3	16	28.7	Ectotherm	1.19		Measured on specimen (scan)	Calculated from ratio against CBL Measured on photograph of another specimen	Taken from https://www.zoobrno.cz/en/our-animals/animals-kept/reptiles/lacerta-viridis	Rismiller, P.D. , and G. Heldmaier (1982) The effect of photoperiod on temperature selection in the European green lizard, Lacerta viridis. Oecologia 53: 222-226.	.
Podarcis	wagleriana	CEB-130040	Lepidosauria	Lacertoidea	1.38	0.57	1.16	0.56	1.16	0.67	0.19	0.19	0.21	0.975	0.86	0.915	0.910711	0.875753	0.81633	3.9	3.2	2.6	0.095	0.095	0.105	19.8	14.2	6.2	-	Ectotherm	1.19		Measured on specimen	Measured on specimen	Meiri, S. 2010. Length-weight allometries in lizards. Journal of Zoology, 281:218-225 Average of all Podarcis	-	.
Podarcis	siculus	NHMUK 1978.1441	Lepidosauria	Lacertoidea	1.435	0.6855	1.245	0.727	1.2975	0.849	0.208	0.199	0.181	1.06025	0.986	1.07325	0.878523	0.8118	0.756205	4.175	4.015	4.353	0.104	0.0995	0.0905	20.4	13.9	8	33.6	Ectotherm	1.19		Measured on specimen (scan)	Measured on specimen (scan)	Meiri, S. 2010. Length-weight allometries in lizards. Journal of Zoology, 281:218-225	Liwanaga et al., 2018 H.E.M. Liwanaga, D. Haroa, Callejasb, et al. Thermal tolerance varies with age and sex for the nonnative Italian Wall Lizard (Podarcis siculus) in southern California J. Therm. Biol., 78 (2018), pp. 263-269	.
Typhlops	jamaicensis	USNM 12378	Lepidosauria	Serpentes	0.426	0.2275	0.46	0.35	0.4995	0.302	0.213	0.203	0.153	0.32675	0.405	0.40075	0.845461	0.648905	0.796526	1.235	1.198	1.491	0.1065	0.1015	0.0765	7.7	6.1	10	-	Ectotherm	1.19		Measured on specimen (scan)	Calculated from ratio against CBL Measured on photograph of another specimen	Legler, J.M., 1959. A new blind snake (Genus Typhlops) from Cuba. Herpetologica, 15(2), pp.105-112. Scaled from the full length of the specimen based from cuban specimens	-	.
Tropidophis	haetianus	TNHC 64040	Lepidosauria	Serpentes	1.3135	0.471	1.0725	0.577	1.2095	0.745	0.34	0.35	0.205	0.89225	0.82475	0.97725	0.933497	0.842948	0.78778	3.493	2.933	3.659	0.17	0.175	0.1025	16.6	11.9	63.1	-	Ectotherm	1.19		Measured on specimen (scan)	Calculated from ratio against CBL Measured on photograph of another specimen	O’Gorman EJ, Hone DWE (2012) Body Size Distribution of the Dinosaurs. PLoS ONE 7(12): e51925. doi:10.1371/journal.pone.0051925 Average of male and female	-	.
Boa	constrictor	CEB-130166	Lepidosauria	Serpentes	2.4535	0.8555	2.34	0.996	2.4225	1.555	0.501	0.434	0.433	1.6545	1.668	1.98875	0.93724	0.904892	0.766789	6.436	6.729	7.776	0.2505	0.217	0.2165	69.0716	45.0296	3599	30.775	Ectotherm	1.19		Measured on specimen (scan)	Calculated from ratio against CBL Measured on photograph of another specimen	Taken from http://genomics.senescence.info/species/entry.php?species=Boa_constrictor	McGinnis, S. & Moore, R. 1969. Thermoregulation in the Boa constrictor. Herpetologica, 25:38.45	.
Uropeltis	melanogaster	FMNH 167048	Lepidosauria	Serpentes	0.81	0.42	0.66	0.51	0.83	0.65	0.14	0.13	0.17	0.615	0.585	0.74	0.855066	0.634738	0.621855	1.8	1.7	2.5	0.07	0.065	0.085	14.2	9.8	6	-	Ectotherm	1.19		Measured on specimen (scan)	Calculated from ratio against CBL Measured on photograph of another specimen	Measured on specimen	-	.
Anomochilus	leonardi	FRIM0026	Lepidosauria	Serpentes	0.559	0.23	0.5075	0.3655	0.4615	0.2815	0.183	0.184	0.179	0.3945	0.4365	0.3715	0.911433	0.69377	0.792426	1.571	1.624	1.712	0.0915	0.092	0.0895	7	5.8	6.5	-	Ectotherm	1.19		Measured on specimen (scan)	Calculated from ratio against CBL Measured on photograph of another specimen	Feldman, A., Pyron, R. A., Sabath, N., Mayrose, I. and Meiri, S. Body-sizes and diversification rates of lizards, snakes, amphisbaenians and the tuatara. Global Ecology and Biogeography	-	.
Cylindrophis	ruffus	FMNH 60958	Lepidosauria	Serpentes	1.629	0.618	1.426	0.851	1.7775	1.2535	0.222	0.181	0.304	1.1235	1.1385	1.5155	0.925243	0.802409	0.709005	3.959	4.069	6.009	0.111	0.0905	0.152	24.3	19.2	383.8	30.1	Ectotherm	1.19		Measured on specimen (scan)	Calculated from ratio against CBL Measured on photograph of another specimen	Kieckbusch, M., Mecke, S., Hartmann, L., Ehrmantraut, L., O’Shea, M.A.R.K. and Kaiser, H., 2016. An inconspicuous, conspicuous new species of Asian pipesnake, genus Cylindrophis (Reptilia: Squamata: Cylindrophiidae), from the south coast of Jawa Tengah, Java, Indonesia, and an overview of the tangled taxonomic history of C. ruffus (Laurenti, 1768) and Forsman, A. and Lindell, L.E., 1993. The adva…	JC Murphy et al. The Ecology of The Water Snakes of Ban Tha Win, Songkhla Province, Thailand 1999	.
Casarea	dussumieri	UMMZ 190285	Lepidosauria	Serpentes	1.1285	0.389	0.955	0.444	0.932	0.508	0.37	0.37	0.29	0.75875	0.6995	0.72	0.938711	0.885352	0.838394	2.827	2.744	2.876	0.185	0.185	0.145	16.4	11.5	62.5271	-	Ectotherm	1.19		Measured on specimen (scan)	Calculated from ratio against CBL Measured on photograph of another specimen	Predicted from CBL and CAOL using an allometric regression computed in this study	-	.
Xenopeltis	unicolor	FMNH 148900	Lepidosauria	Serpentes	3.48	1.275	2.525	1.66	4.185	2.82	0.31	0.24	0.33	2.3775	2.0925	3.5025	0.930466	0.753519	0.738882	8.53	7.99	14.38	0.155	0.12	0.165	29.8	19.8	752.9	25	Ectotherm	1.19		Measured on specimen (scan)	Calculated from ratio against CBL Measured on photograph of another specimen	Measured on specimen	Taken from https://reptile.guide/sunbeam-snake-care/ Based on requirements to breed in captivity	.
Morelia	spilota	FMNH 218598	Lepidosauria	Serpentes	2.423	0.8535	2.1155	1.1215	2.1645	1.5165	0.533	0.481	0.492	1.63825	1.6185	1.8405	0.935906	0.847913	0.713531	6.717	5.691	7.069	0.2665	0.2405	0.246	50.8	32.2	1669	27.7	Ectotherm	1.19		Measured on specimen	Calculated from ratio against CBL Measured on photograph of another specimen	Measured on FMNH 20682, FMNH 35000, FMNH 74870, average scaled using CBLs (square root of body mass was used for scaling)	Slip D. J. & Shine R. (1988b) Thermoregulation of free‐ranging Diamond Pythons, Morelia spilota (Serpentes, Boidae). Copeia 1988, 984– 5.	.
Python	molurus	TNHC 62769	Lepidosauria	Serpentes	2.99	0.87	2.695	1.34	2.725	2.14	0.62	0.59	0.65	1.93	2.0175	2.4325	0.956732	0.867626	0.619089	7.29	7.69	9.13	0.31	0.295	0.325	77	50.7	27250	30	Ectotherm	1.19		Measured on specimen (scan)	Calculated from ratio against CBL Measured on photograph of another specimen	Measured on FMNH 11874, scaled using CBLs (square root of body mass was used for scaling)	Taken from http://www.exoticpetvet.com/burmese-python-care.html Based on requirements to breed in captivity	.
Acrochordus	granulatus	FMNH 201350	Lepidosauria	Serpentes	1.8555	0.64	1.343	0.762	1.4345	0.8615	0.41	0.414	0.359	1.24775	1.0525	1.148	0.938632	0.823452	0.799581	5.112	4.406	4.455	0.205	0.207	0.1795	16.8	11.7	215	26	Ectotherm	1.19		Measured on specimen (scan)	Calculated from ratio against CBL Measured on photograph of another specimen	Measured on specimen	Pratt KL, Campbell HA, Watts ME, and Franklin CE. 2010. Environmental and ecological factors influencing dive behavior in the freshwater snake Acrochordus arafurae: a field-based telemetric study. Mar Freshwater Res 61: 560– 67.	.
Xenodermus	javanicus	FMNH 158613	Lepidosauria	Serpentes	0.93	0.38	0.74	0.47	0.76	0.58	0.22	0.23	0.24	0.655	0.605	0.67	0.912713	0.772401	0.646212	1.9	2.1	2.3	0.11	0.115	0.12	11.9	6.4	12	25	Ectotherm	1.19		Measured on specimen (scan)	Calculated from ratio against CBL Measured on photograph of another specimen	Measured on specimen	Sergey V. Kudryavtsev and Vasyliy A. Latyshev Xenodermus javanicus REINHARDT, 1836: CAPTIVE HUSBANDRY AND BREEDING Vol. 22, No. 1, 2015, pp. 75 – 78	.
Cerastes	cerastes	NHMUK 1930.5.8.952	Lepidosauria	Serpentes	1.756	0.594	1.4605	0.6915	1.32301	0.961887	0.361662	0.416941	0.356	1.175	1.076	1.14245	0.94105	0.880811	0.686591	5.227	4.548	4.43096	0.180831	0.20847	0.178	20.4	15.1	371.3	29.2	Ectotherm	1.19		Measured on specimen (scan)	Measured on specimen (scan)	Feldman, A., Pyron, R. A., Sabath, N., Mayrose, I. and Meiri, S. Body-sizes and diversification rates of lizards, snakes, amphisbaenians and the tuatara. Global Ecology and Biogeography	Al-Sadoon, M. K., Kandeal, S. A., Al-Swilum, A., & Al-Otaibi, H. S. (2016). Determination of Body Temperature in the Horned Viper (Cerastes cerastes gasperettii) as Affected by Field or Laboratory Ambient Temperature. Зоологический журнал, 95(5), 579-583.	.
Ahaetulla	nasuta	NHMUK 1930.5.8.725	Lepidosauria	Serpentes	2.17	0.89	1.63	1.02	1.91	1.22	0.46	0.48	0.43	1.53	1.325	1.565	0.912023	0.78001	0.76942	8.1	6	6.2	0.23	0.24	0.215	27.7	12.5	130.4	26.5	Ectotherm	1.19		Measured on specimen (scan)	Measured on specimen (scan)	Measured on FMNH 117861, scaled using CBLs (square root of body mass was used for scaling)	Taken from https://worldofreptiles.forumgratuit.org/t135-ahaetulla-nasuta-snake-vine Based on requirements to breed in captivity	.
Chrysopelea	paradisi	FMNH 71626	Lepidosauria	Serpentes	1.79	0.78	1.54	0.91	1.41	1.08	0.31	0.33	0.35	1.285	1.225	1.245	0.900066	0.806738	0.642891	6	5.3	5	0.155	0.165	0.175	19	12.9	111	26	Ectotherm	1.19		Measured on specimen (scan)	Measured on specimen (scan)	Measured on specimen	Taken from https://www.reptiletalk.net/paradise-tree-snake/ Based on requirements to breed in captivity	.
Aparallactus	werneri	FMNH 250439	Lepidosauria	Serpentes	0.9645	0.3845	0.7475	0.3655	0.853	0.527	0.181	0.202	0.207	0.6745	0.5565	0.69	0.917102	0.872304	0.78632	2.472	2.137	2.471	0.0905	0.101	0.1035	9.9	6.9	13	-	Ectotherm	1.19		Measured on specimen (scan)	Measured on specimen (scan)	Measured on specimen	-	.
Naja	naja	NHMUK 59.9.21.2	Lepidosauria	Serpentes	2.28	0.76	1.88	0.87	1.965	1.32	0.38	0.43	0.37	1.52	1.375	1.6425	0.942809	0.88648	0.740773	6.5	5.92	6.35	0.19	0.215	0.185	26.9	19.8	243.9	-	Ectotherm	1.19		Measured on specimen (scan)	Calculated from ratio against CBL Measured on photograph of another specimen	Measured on FMNH 121197, scaled using CBLs (square root of body mass was used for scaling)	-	.
Laticauda	colubrina	FMNH 202810	Lepidosauria	Anguimorpha	1.85	0.92	1.89	1.14	1.8	1.16	0.41	0.43	0.42	1.385	1.515	1.48	0.86758	0.797609	0.764651	4.5	6.2	5.6	0.205	0.215	0.21	28.3	23	1305.8	28.1	Ectotherm	1.19		Measured on specimen (scan)	Calculated from ratio against CBL Measured on photograph of another specimen	Meiri, S., 2010. Length–weight allometries in lizards. Journal of Zoology, 281(3), pp.218-226. Calculated from CBL using allometric regressions	Shetty S, Shine R (2002c) Activity patterns of yellow-lipped sea kraits (Laticauda colubrina) on a Fijian island. Copeia 2002:77–85	.
Heloderma	horridum	TNHC 64380	Lepidosauria	Anguimorpha	2.684	1.135	2.729	1.6015	2.685	1.859	0.566	0.57	0.614	1.9095	2.16525	2.272	0.906187	0.809699	0.721547	4.428	4.821	6.639	0.283	0.285	0.307	63.7	44	1088.3	29.5	Ectotherm	1.19		Measured on specimen (scan)	Measured on specimen (scan)	Meiri, S., 2010. Length–weight allometries in lizards. Journal of Zoology, 281(3), pp.218-226.	Beck, D.D., and Lowe, C.H. 1991. Ecology of the beaded lizard, Heloderma horridum, in a tropical dry rain forest in Jalisco, Mexico.J. Herpetol. 25:395–406.	.
Heloderma	suspectum	TNHC 62766	Lepidosauria	Anguimorpha	2.1995	1.033	2.3905	1.2015	2.2465	1.702	0.57	0.611	0.621	1.61625	1.796	1.97425	0.882852	0.864511	0.652692	5.938	6.682	8.403	0.285	0.3055	0.3105	56.1	36.6	551.3	28.7	Ectotherm	1.19		Measured on specimen (scan)	Calculated from ratio against CBL Measured on photograph of another specimen	Meiri, S., 2010. Length–weight allometries in lizards. Journal of Zoology, 281(3), pp.218-226.	Seligmann H, Labra A. (2013). Tetracoding increases with body temperature in Lepidosauria. Biosystems 114:155–63.	.
Ophisaurus	apodus	YPM 12870	Lepidosauria	Anguimorpha	2.5	0.91	1.99	1.24	2.31	1.54	0.43	0.36	0.44	1.705	1.615	1.925	0.931399	0.78213	0.745356	5.4	5.3	5.7	0.215	0.18	0.22	41.9	28.6	616	23	Ectotherm	1.19		Measured on specimen (scan)	Calculated from ratio against CBL Measured on photograph of another specimen	Meiri, S., 2010. Length–weight allometries in lizards. Journal of Zoology, 281(3), pp.218-226. Calculated from CBL using allometric regressions	Meek R (1986) Field body temperature of the glass lizard Ophisaurus apodus in Yugoslavia. Amphibia-Reptilia 7: 43-49	.
Gerrhonotus	infernalis	YPM 14379	Lepidosauria	Anguimorpha	1.87	0.81	2.02	0.77	2	1.12	0.36	0.39	0.39	1.34	1.395	1.56	0.901319	0.924497	0.828493	4.6	5.1	4.5	0.18	0.195	0.195	30.7	20.3	32.9	24.45	Ectotherm	1.19		Measured on specimen (scan)	Measured on specimen (scan)	García-Bastida, M., Lazcano, D., McBrayer, L.D. and Mercado-Hernández, R., 2013. Sexual dimorphism in the alligator lizard Gerrhonotus infernalis (Sauria: Anguidae): implications for sexual selection. The Southwestern Naturalist, 58(2), pp.202-208.	García-Bastida, M. 2013. Aspectos Ecológicos de Gerrhonotus infernalis (Sauria: Anguidae) en el Parque Ecológico Chipinque, San Pedro Garza García, Nuevo León, México. Unpublished doctoral thesis. Facultad de Ciencias Biológicas, Universidad Autónoma de Nuevo León, Monterrey, Nuevo León, Mexico. Average spring and summer.	.
Elgaria	coerulea	NHMUK 1964.1829	Lepidosauria	Anguimorpha	1.74	0.62	1.41	0.62	1.48	0.79	0.32	0.32	0.33	1.18	1.015	1.135	0.934363	0.898137	0.845621	4.7	3.7	3.5	0.16	0.16	0.165	20.1	9.8	45.7	23.8	Ectotherm	1.19		Measured on specimen (scan)	Measured on specimen (scan)	Feldman, A., Pyron, R. A., Sabath, N., Mayrose, I. and Meiri, S. Body-sizes and diversification rates of lizards, snakes, amphisbaenians and the tuatara. Global Ecology and Biogeography	Kingsbury B.A.. 1994 Thermal constraints and eurythermy in the lizard Elgaria multicarinata. Herpetologica. 50, 266–273.	.
Lanthanotus	borneensis	Average (YPM 6057, FMNH 148589)	Lepidosauria	Anguimorpha	1.9	0.7	1.78	0.86	1.91	1.08	0.39	0.33	0.44	1.3	1.32	1.495	0.929659	0.87554	0.824786	4.1	5.1	4.7	0.195	0.165	0.22	25.2	17.5	40	26.4	Ectotherm	1.19		Average of specimens	Calculated from ratio against CBL Measured on photograph of another specimen	Measured on FMNH 148589	Langner, C. 2017. Hidden in the heart of Borneo—shedding light on some mysteries of an enigmatic lizard: first records of habitat use, behavior, and food items of Lanthanotus borneensis Steindachner, 1878, in its natural habitat. Russian Journal of Herpetology 24:1–10.	.
-	-	YPM 6057	Lepidosauria	Anguimorpha	1.925	0.6315	1.774	0.6895	1.9265	0.967	0.4162	0.309	0.4432	1.27825	1.23175	1.44675	0.94466	0.921377	0.864899	4.563	4.791	4.055	0.2081	0.1545	0.2216	23	-	-	26.4	Ectotherm	1.19		Measured on specimen (scan)	-	-	Langner, C. 2017. Hidden in the heart of Borneo—shedding light on some mysteries of an enigmatic lizard: first records of habitat use, behavior, and food items of Lanthanotus borneensis Steindachner, 1878, in its natural habitat. Russian Journal of Herpetology 24:1–10.	.
-	-	FMNH 148589	Lepidosauria	Anguimorpha	1.873	0.774	1.784	1.03983	1.885	1.187	0.362	0.348	0.444	1.3235	1.41192	1.536	0.910622	0.812568	0.776832	3.688	5.346	5.385	0.181	0.174	0.222	27.3	-	40	26.4	Ectotherm	1.19		Measured on specimen (scan)	-	Measured on the specimen	Langner, C. 2017. Hidden in the heart of Borneo—shedding light on some mysteries of an enigmatic lizard: first records of habitat use, behavior, and food items of Lanthanotus borneensis Steindachner, 1878, in its natural habitat. Russian Journal of Herpetology 24:1–10.	.
Varanus	niloticus	UCMZ R.9586	Lepidosauria	Anguimorpha	4.4955	1.987	3.7775	2.1905	3.7625	2.6605	0.67	0.821	0.782	3.24125	2.984	3.2115	0.897016	0.814701	0.707104	13.585	11.638	13.265	0.335	0.4105	0.391	99.4	55.3	2890	28.8	Ectotherm	1.19		Measured on specimen (scan)	Calculated from ratio against CBL Measured on photograph of another specimen	Meiri, S. 2010. Length-weight allometries in lizards. Journal of Zoology, 281:218-224	Seligmann H, Labra A. (2013). Tetracoding increases with body temperature in Lepidosauria. Biosystems 114:155–63.	.
Varanus	exanthematicus	NHMUK 1932.6.1.12	Lepidosauria	Anguimorpha	2.7445	1.2555	2.56	1.2655	2.1965	1.693	0.603	0.556	0.518	2	1.91275	1.94475	0.88923	0.869271	0.637111	7.506	7.709	7.946	0.3015	0.278	0.259	49.1	31.1	709	36.5	Ectotherm	1.19		Measured on specimen (scan)	Calculated from ratio against CBL Measured on photograph of another specimen	Meiri, S. 2010. Length-weight allometries in lizards. Journal of Zoology, 281:218-224	Wood, S. C., Johansen, K., Glass, M. L. & Maloiy, G. M. O. (1978). Aerobic metabolism of the lizard Varanus exanthematicus: effects of activity, temperature, and size. Journal of Comparative Physiology B 127, 331–336.	.
Varanus	salvator	FMNH 35144	Lepidosauria	Anguimorpha	5.29	2.8	4.83	3.12	4.19	3.2	0.95	0.89	0.95	4.045	3.975	3.695	0.848434	0.763369	0.645544	14	13.2	13.5	0.475	0.445	0.475	140.5	75.2	4345	35.5	Ectotherm	1.19		Measured on specimen (scan)	Calculated from ratio against CBL Measured on photograph of another specimen	Measured on specimen	Gleeson, T. 1981. Preferred Body Temperature, Aerobic Scope, and Activity Capacity in the Monitor Lizard, Varanus salvator. Physiological Zoology, 54:423-429.	.
Varanus	jobiensis	CEB-130032	Lepidosauria	Anguimorpha	3.45	1.46	2.93	1.4	2.42	1.67	0.45	0.5	0.45	2.455	2.165	2.045	0.906042	0.87846	0.723731	9.8	8.2	8.8	0.225	0.25	0.225	52	30.7	1300	32.2	Ectotherm	1.19		Measured on specimen	Calculated from ratio against CBL Measured on photograph of another specimen	Meiri, S. 2010. Length-weight allometries in lizards. Journal of Zoology, 281:218-224	Taken from https://www.reptilesmagazine.com/the-peach-throat-monitor/ Based on requirements to breed in captivity	.
Varanus	giganteus	NHMUK 97.5.31.1	Lepidosauria	Anguimorpha	3.59	1.71	3.38	1.87	2.81	2.28	0.68	0.61	0.63	2.65	2.625	2.545	0.87927	0.833012	0.584508	10.2	9.4	9.7	0.34	0.305	0.315	99.1	41.2	584.1	36	Ectotherm	1.19		Measured on specimen (scan)	Calculated from ratio against CBL Measured on photograph of another specimen	Meiri, S. 2010. Length-weight allometries in lizards. Journal of Zoology, 281:218-224	King, D. , Green, B. , and Butler, W. H. (1989). The activity pattern, temperature regulation and diet of Varanus giganteus on Barrow Island, Western Australia. Australian Wildlife Research 16, 41–47.	.
Chamaeleo	senegalensis laevigatus	FMNH 47572	Lepidosauria	Iguania	2.02	0.95	1.71	1.11	1.39	1.05	0.41	0.44	0.36	1.485	1.41	1.22	0.882508	0.760684	0.655269	6.1	5.2	3.8	0.205	0.22	0.18	23	16.4	31.1	29.7	Ectotherm	1.19		Measured on specimen (scan)	Calculated from ratio against CBL Measured on photograph of another specimen	Meiri, S. 2010. Length-weight allometries in lizards. Journal of Zoology, 281:218-224	Algar, A. C., Morley, K., & Boyd, D. S. (2018). Remote sensing restores predictability of ectotherm body temperature in the world’s forests. Global Ecology and Biogeography, 27, 1412– 1425. Average of Chameleo	.
Brookesia	brygooi	FMNH 260015	Lepidosauria	Iguania	1.109	0.666	0.933	0.714	0.952	0.924	0.359	0.411	0.481	0.8875	0.8235	0.938	0.799594	0.643705	0.240746	3.616	3.219	3.457	0.1795	0.2055	0.2405	13.1	10.4	3.4	23.9	Ectotherm	1.19		Measured on specimen (scan)	Calculated from ratio against CBL Measured on photograph of another specimen	O’Gorman EJ, Hone DWE (2012) Body Size Distribution of the Dinosaurs. PLoS ONE 7(12): e51925. doi:10.1371/journal.pone.0051925 Average of male and female	Taken from http://www.chameleonnews.com/02SepSmith.html Based on requirements to breed in captivity	.
Draco	quinquefasciatus	FMNH 221322	Lepidosauria	Iguania	1.848	1.025	1.3955	0.8375	1.2315	0.976	0.328	0.307	0.298	1.4365	1.1165	1.10375	0.832081	0.799892	0.609834	5.381	4.465	4.447	0.164	0.1535	0.149	18.3	13.2	11.6	-	Ectotherm	1.19		Measured on specimen (scan)	Calculated from ratio against CBL Measured on photograph of another specimen	Meiri, S. 2010. Length-weight allometries in lizards. Journal of Zoology, 281:218-224	-	.
Uromastyx	hardwickii	UCA.5	Lepidosauria	Iguania	3.403	1.552	2.725	1.48	2.365	1.99	0.551	0.631	0.59	2.4775	2.1025	2.1775	0.889945	0.839656	0.540354	10.559	8.662	8.626	0.2755	0.3155	0.295	45	33.7	178	38.9	Ectotherm	1.19		Measured on specimen (scan)	Calculated from ratio against CBL Measured on photograph of another specimen	Meiri, S. 2010. Length-weight allometries in lizards. Journal of Zoology, 281:218-224	Taken from https://www.reptilesmagazine.com/uromastyx-lizard/ Based on requirements to breed in captivity	.
Saara	aegyptia	FMNH 78661	Lepidosauria	Iguania	3.629	1.5735	2.783	1.456	2.278	1.7985	0.445	0.432	0.57	2.60125	2.1195	2.03825	0.90111	0.852224	0.61374	10.053	7.912	8.397	0.2225	0.216	0.285	44.7	34.8	778	37.1	Ectotherm	1.19		Measured on specimen (scan)	Calculated from ratio against CBL Measured on photograph of another specimen	Measured on specimen	M Al-Sayegh Eco-physiological Implications of Conservation of Dhubs (Uromastyx aegyptius) in Kuwait 2017	.
Sceloporus	variabilis	FMNH 122866	Lepidosauria	Iguania	1.67	0.84	1.38	0.88	1.17	1.09	0.19	0.24	0.22	1.255	1.13	1.13	0.86429	0.7703	0.363424	4.7	3.6	3	0.095	0.12	0.11	18.8	13.8	11	30.7	Ectotherm	1.19		Measured on specimen (scan)	Calculated from ratio against CBL Measured on photograph of another specimen	Meiri, S. 2010. Length-weight allometries in lizards. Journal of Zoology, 281:218-224	Benabib M, Congdon JD. 1992. Metabolic and water-flux rates of free-ranging tropical lizards Sceloporus variabilis. Physiol. Zool. 65:788–802	.
Leiocephalus	barahonensis	USNM 260564	Lepidosauria	Iguania	1.691	1.0025	1.4595	0.875	1.35	1.202	0.156	0.185	0.222	1.34675	1.16725	1.276	0.805317	0.800359	0.455237	4.882	4.295	5.266	0.078	0.0925	0.111	16.9	12.9	13.8	36.1	Ectotherm	1.19		Measured on specimen (scan)	Calculated from ratio against CBL Measured on photograph of another specimen	Meiri, S., 2010. Length–weight allometries in lizards. Journal of Zoology, 281(3), pp.218-226. Calculated from CBL using allometric regressions	Scharf, I., Feldman, A., Novosolov, M., Pincheira‐Donoso, D., Das, I., Böhm, M., Uetz, P., Torres‐Carvajal, O., Bauer, A., Roll, U. and Meiri, S., 2015. Late bloomers and baby boomers: ecological drivers of longevity in squamates and the tuatara. Global Ecology and Biogeography, 24(4), pp.396-405.	.
Morunasaurus	annularis	USNM 200767	Lepidosauria	Iguania	2.843	1.4695	2.3085	1.4215	2.33	1.8955	0.353	0.343	0.396	2.15625	1.865	2.11275	0.856056	0.787928	0.581538	7.962	6.843	8.186	0.1765	0.1715	0.198	33	25.2	78.8	24.9	Ectotherm	1.19		Measured on specimen (scan)	Calculated from ratio against CBL Measured on photograph of another specimen	Meiri, S., 2010. Length–weight allometries in lizards. Journal of Zoology, 281(3), pp.218-226. Calculated from CBL using allometric regressions	Köhler et al., 1999 G. Köhler, R. Seipp, S. Moya, A. Almendáriz Zur Kenntnis von Morunasaurus annularis (O’Shaughnessy, 1881) Salamandra, 35 (1999), pp. 181-190	.
Gambelia	wislizenii	NHMUK 1792.568	Lepidosauria	Iguania	2.19	1.14	1.82	0.92	1.59	1.3	0.34	0.37	0.33	1.665	1.37	1.445	0.853832	0.86283	0.575772	6.2	5.7	5.9	0.17	0.185	0.165	22.1	14.8	96.8	37.4	Ectotherm	1.19		Measured on specimen (scan)	Calculated from ratio against CBL Measured on photograph of another specimen	Meiri, S., 2010. Length–weight allometries in lizards. Journal of Zoology, 281(3), pp.218-226. Calculated from CBL using allometric regressions	Seligmann H, Labra A. (2013). Tetracoding increases with body temperature in Lepidosauria. Biosystems 114:155–63.	.
Basiliscus	basiliscus barbouri	FMNH 165622	Lepidosauria	Iguania	2.736	1.6055	2.0435	1.4255	2.1395	1.6005	0.377	0.331	0.464	2.17075	1.7345	1.87	0.809728	0.716509	0.663618	8.45	6.471	7.061	0.1885	0.1655	0.232	41.8	29.3	250	35	Ectotherm	1.19		Measured on specimen (scan)	Calculated from ratio against CBL Measured on photograph of another specimen	Meiri, S. 2010. Length-weight allometries in lizards. Journal of Zoology, 281:218-224	Seligmann H, Labra A. (2013). Tetracoding increases with body temperature in Lepidosauria. Biosystems 114:155–63. Based on Basiliscus vittatus.	.
Liolaemus	chilensis	NHMUK 1970.1.20.135	Lepidosauria	Iguania	1.75	0.8	1.48	0.73	1.32	0.99	0.27	0.33	0.31	1.275	1.105	1.155	0.889393	0.869891	0.661438	5	4.9	3.8	0.135	0.165	0.155	20.2	14.7	13	34.3	Ectotherm	1.19		Measured on specimen (scan)	Measured on specimen (scan)	Meiri, S. 2010. Length-weight allometries in lizards. Journal of Zoology, 281:218-225	Labra A (1998) Selected body temperatures of seven species of Chilean Liolaemus lizards. Rev Chil Hist Nat 71:349–358	.
Liolaemus	bellii	MVZ 125659	Lepidosauria	Iguania	1.455	0.65	1.07	0.665	1.08	1.02	0.25	0.26	0.25	1.0525	0.8675	1.05	0.894666	0.783418	0.328671	4.56	3.64	4.22	0.125	0.13	0.125	16.9	12.8	11.3	33.5	Ectotherm	1.19		Measured on specimen (scan)	Calculated from ratio against CBL Measured on photograph of another specimen	Meiri, S. 2010. Length-weight allometries in lizards. Journal of Zoology, 281:218-225	Labra A (1998) Selected body temperatures of seven species of Chilean Liolaemus lizards. Rev Chil Hist Nat 71:349–358	.
Anolis	sagrei	NHMUK 1964.179	Lepidosauria	Iguania	1.4	0.73	1.22	0.68	1.11	0.89	0.22	0.22	0.25	1.065	0.95	1	0.853295	0.830259	0.59759	3.9	3.4	4.4	0.11	0.11	0.125	13.5	8.4	5.1	33.3	Ectotherm	1.19		Measured on specimen (scan)	Calculated from ratio against CBL Measured on photograph of another specimen	Meiri, S. 2010. Length-weight allometries in lizards. Journal of Zoology, 281:218-225	Corn, M. J. 1971. Upper thermal limits and thermal preferenda for three sympatric species of Anolis. J. Herpetol. 5: 17– 21.	.
Anolis	grahami	NHMUK 1964.1782	Lepidosauria	Iguania	1.55	0.82	1.39	0.82	1.25	1.03	0.42	0.38	0.36	1.185	1.105	1.14	0.848602	0.807456	0.56659	4.9	4.4	5.6	0.21	0.19	0.18	20	12	6.1	31.2	Ectotherm	1.19		Measured on specimen (scan)	Measured on specimen (scan)	Meiri, S. 2010. Length-weight allometries in lizards. Journal of Zoology, 281:218-225	Lister, B.C. 1976a. The nature of niche expansion in West Indian Anolis lizards II: evolutionary components. Evolution 30: 677– 692.	.
Eothyris	parkeri	MCZ 1161	NTS	NTS	4.1	2.45	3.01	2.11	3.56	2.64	0.72	0.71	0.85	3.275	2.56	3.1	0.801823	0.713165	0.670872	16.3	11.31	15.37	0.36	0.355	0.425	63	48.1	1894.51	-	Unknown	1.19		Measured on specimen	Measured on specimen	Predicted from CBL and CAOL using an allometric regression computed in this study	-	.
Dimetrodon	sp.	FMNH PR 4976 (probably MCZ9560)	NTS	NTS	7.42227	3.08566	5.25397	2.50189	6.8385	3.66944	1.16755	1.16755	1.16755	5.25397	3.87793	5.25397	0.909488	0.879342	0.843846	19.0144	15.3449	22.0166	0.583774	0.583774	0.583774	260	110	59410.7	-	Unknown	1.19		Measured on specimen	Calculated from ratio against CBL Measured on photograph of another specimen	Predicted from CBL and CAOL using an allometric regression computed in this study	-	.
Hipposaurus	boonstrai	CG WB123	NNT	NNT	6.885	5.03	6.235	4.535	5.665	3.475	0.82	0.85	1.03	5.9575	5.385	4.57	0.682834	0.686271	0.78976	23.79	17.74	19.39	0.41	0.425	0.515	193.9	108.5	37929.4	-	Unknown	1.19		Measured on specimen	Measured on specimen	Predicted from CBL and CAOL using an allometric regression computed in this study	-	.
Lemurosaurus	pricei	Average (BP/1/816, NMQR 1702)	NNT	NNT	4.662	3.3475	3.55375	2.77	3.331	2.492	0.774	0.6815	0.687	4.00475	3.16188	2.9115	0.696002	0.626454	0.663559	14.6605	10.9925	11.9185	0.387	0.34075	0.3435	96.9	47	2738.82	-	Unknown	1.19		Average of specimens	Calculated from ratio against CBL measured on specimen NMQR 1702	Predicted from CBL and CAOL using an allometric regression computed in this study	-	.
-	-	BP/1/816	NNT	NNT	4.5135	3.3645	3.064	2.7405	2.932	2.67	0.633	0.495	0.631	3.939	2.90225	2.801	0.666583	0.44723	0.413198	13.408	9.941	11.199	0.3165	0.2475	0.3155	75.2	-	-	-	-	-		Measured on specimen	-	-	-
-	-	NMQR 1702	NNT	NNT	4.8105	3.3305	4.0435	2.7995	3.73	2.314	0.915	0.868	0.743	4.0705	3.4215	3.022	0.721572	0.721566	0.784305	15.913	12.044	12.638	0.4575	0.434	0.3715	118.53	57.4913	-	-	-	-		Measured on specimen	Measured on specimen	-	-
Leucocephalus	wewersi	SAM-PK-K11112	NNT	NNT	5.985	3.36	4.41	2.825	4.425	3.46	0.84	0.74	0.73	4.6725	3.6175	3.9425	0.827542	0.767883	0.623378	18.07	13.17	16.91	0.42	0.37	0.365	119.5	67.9	7772.34	-	Unknown	1.19		Measured on specimen	Measured on specimen	Predicted from CBL and CAOL using an allometric regression computed in this study	-	.
Herpetoskylax	hopsoni	BP/1/3924	NNT	NNT	4.175	3.915	3.295	2.395	3.815	2.46	0.67	0.7	0.8	4.045	2.845	3.1375	0.34738	0.686787	0.764332	14.81	9.84	12.37	0.335	0.35	0.4	112.8	53.6	4354.04	-	Unknown	1.19		Measured on specimen	Measured on specimen	Predicted from CBL and CAOL using an allometric regression computed in this study	-	.
Moschops	capensis	AM 6556	NNT	NNT	7.81	4.515	6.865	5.12	7.455	4.585	1.33	1.3	1.65	6.1625	5.9925	6.02	0.815962	0.666156	0.788509	24.38	21.21	25.65	0.665	0.65	0.825	340.2	161.8	174460	-	Unknown	1.19		Measured on specimen	Measured on specimen	Predicted from CBL and CAOL using an allometric regression computed in this study	-	.
Patranomodon	nyaphulii	NMQR 3000	Anomodontia	Anomodontia	4.0195	2.492	2.923	2.0355	2.882	2.5385	0.587	0.578	0.56	3.25575	2.47925	2.71025	0.78462	0.717679	0.473466	10.946	8.912	11.024	0.2935	0.289	0.28	63.6	44.5	1472.1	-	Unknown	1.19		Measured on specimen	Measured on specimen	Predicted from CBL and CAOL using an allometric regression computed in this study	-	.
Eodicynodon	oosthuizeni	NMQR 2978	Anomodontia	Anomodontia	6.1585	3.814	5.704	2.9105	4.5885	4.3555	0.964	0.9	0.929	4.98625	4.30725	4.472	0.785149	0.860023	0.31461	17.842	16.044	18.882	0.482	0.45	0.4645	99.8	70.6	6799.18	-	Unknown	1.19		Measured on specimen	Calculated from ratio against CBL Measured on a reconstruction of the skull	Predicted from CBL and CAOL using an allometric regression computed in this study	-	.
Diictodon	feliceps	GPIT/RE/9275	Anomodontia	Anomodontia	2.191	1.191	1.819	1.135	1.222	1.1815	0.421	0.353	0.416	1.691	1.477	1.20175	0.839353	0.781449	0.255316	6.269	5.418	6.113	0.2105	0.1765	0.208	40.4	32	422.192	-	Unknown	1.19		Measured on specimen	Calculated from ratio against CBL Measured on photograph of another specimen	Predicted from CBL and CAOL using an allometric regression computed in this study	-	.
Pristerodon	mackayi	NHCC LB355	Anomodontia	Anomodontia	4.792	3.1045	4.0575	2.8	3.3165	2.9415	0.606	0.547	0.726	3.94825	3.42875	3.129	0.761767	0.723733	0.461906	14.351	12.255	14.18	0.303	0.2735	0.363	86.6	68.6	5403.72	-	Unknown	1.19		Measured on specimen	Calculated from ratio against CBL Measured on photograph of another specimen	Predicted from CBL and CAOL using an allometric regression computed in this study	-	.
Niassodon	mfumukasi	ML1620	Anomodontia	Anomodontia	3.4135	2.359	3.4805	2.4595	2.7155	2.5575	0.625	0.632	0.83	2.88625	2.97	2.6365	0.722779	0.707562	0.33613	10.525	9.629	12.341	0.3125	0.316	0.415	63.5	46.9	1646.09	-	Unknown	1.19		Measured on specimen	Measured on specimen	Predicted from CBL and CAOL using an allometric regression computed in this study	-	.
Endothiodon	bathystoma	Average (MTA/ACL001 , MTA/ACL002 , MTA/ACL003)	Anomodontia	Anomodontia	11.9613	6.74233	10.583	5.54386	9.02767	6.642	1.29667	1.37667	1.31333	9.35183	8.06343	7.83483	0.818761	0.847256	0.674034	34.0427	27.0756	33.244	0.648333	0.688333	0.656667	260	174.2	148503	-	Unknown	1.19		Macungo, Z., Loide, I., Zunguza, S., Nhamutole, N., Maharaj, I.E.M., Mugabe, J., Angielczyk, K.D. and Araújo, R., 2020. Endothiodon (Therapsida, Anomodontia) specimens from the middle/late Permian of the Metangula Graben (Niassa Province, Mozambique) increase complexity to the taxonomy of the genus. Journal of African Earth Sciences, 163, p.103647. Average of 36 Mozambican specimens	Calculated from ratio against CBL measured on a reconstruction of the skull	Predicted from CBL and CAOL using an allometric regression computed in this study	-	.
-	-	MTA/ACL001	Anomodontia	Anomodontia	12.192	7.583	10.78	6.497	9.351	7.451	1.484	1.638	1.394	9.8875	8.6385	8.401	0.783045	0.797975	0.604226	35.3	28.82	36.094	0.742	0.819	0.697	-	-	-	-	-	-		-	-	-	-
-	-	MTA/ACL002	Anomodontia	Anomodontia	12.507	5.673	11.353	5.022	8.845	6.527	1.16	1.246	1.136	9.09	8.1875	7.686	0.891213	0.896842	0.674876	33.886	27.404	33.096	0.58	0.623	0.568	-	-	-	-	-	-		-	-	-	-
-	-	MTA/ACL003	Anomodontia	Anomodontia	11.185	6.971	9.61603	5.11257	8.887	5.948	1.246	1.246	1.41	9.078	7.3643	7.4175	0.782026	0.846951	0.742999	32.942	25.0028	30.542	0.623	0.623	0.705	-	-	-	-	-	-		-	-	-	-
Endothiodon	tolani	Average (NHCC LB648 , NMT RB162)	Anomodontia	Anomodontia	6.898	3.60925	5.64375	3.36175	5.80475	3.03425	1.1575	0.9043	1.0823	5.25362	4.50275	4.4195	0.844072	0.802378	0.855105	21.647	18.313	23.9105	0.57875	0.45215	0.54115	151.5	101.2	24249	-	Unknown	1.19		Average of specimens	Calculated from ratio against CBL Measured on photograph of another specimen	Predicted from CBL and CAOL using an allometric regression computed in this study	-	.
-	-	NHCC LB648	Anomodontia	Anomodontia	8.224	3.9685	5.7025	3.2495	6.7565	3.741	1.26	0.9036	1.2086	6.09625	4.476	5.24875	0.875868	0.821757	0.832724	26.927	21.929	29.305	0.63	0.3768	0.5548	155.8	-	-	-	-	-		Measured on specimen	-	-	-
-	-	NMT RB162	Anomodontia	Anomodontia	5.572	3.25	5.585	3.474	4.853	2.3275	1.055	0.905	0.956	4.411	4.5295	3.59025	0.812276	0.782999	0.877487	16.367	14.697	18.516	0.5275	0.5275	0.5275	147.2	-	-	-	-	-		Measured on specimen	-	-	-
Abajudon	kaayai	NHCC LB314	Anomodontia	Anomodontia	6.46	3.71	6.5	3.42	5.73	3.76	0.89	0.92	1.24	5.085	4.96	4.745	0.818643	0.850389	0.754591	18.8	15.5	17.8	0.445	0.46	0.62	96.8	69.7	6378.99	-	Unknown	1.19		Measured on specimen	Measured on specimen	Predicted from CBL and CAOL using an allometric regression computed in this study	-	.
Dicynodontoides	cf. recurvidens	NHCC LB117	Anomodontia	Anomodontia	4.67	2.46	4.42	2.32	4.19	2.3	0.63	0.73	1.09	3.565	3.37	3.245	0.85001	0.851172	0.835871	14.8	11.3	14.2	0.315	0.365	0.545	113.8	94.6	14947.7	-	Unknown	1.19		Measured on specimen	Calculated from ratio against CBL Measured on photograph of another specimen	Predicted from CBL and CAOL using an allometric regression computed in this study	-	.
Kembawacela	kitchingi	NHCC LB18	Anomodontia	Anomodontia	3.89	1.96	3.39	2.01	2.91	1.93	0.45	0.49	0.6	2.925	2.7	2.42	0.863788	0.805261	0.748415	11.5	10.3	10.1	0.225	0.245	0.3	47	32.7	529.001	-	Unknown	1.19		Measured on specimen	Measured on specimen	Predicted from CBL and CAOL using an allometric regression computed in this study	-	.
Kawingasaurus	fossilis	GPIT/RE/9272	Anomodontia	Anomodontia	2.98	1.6425	2.5755	1.319	2.747	2.697	0.439	0.485	0.558	2.31125	2.39	2.4545	0.83439	0.84042	0.542656	8.754	5.85	11.22	0.2195	0.2425	0.279	36.9	25.4	230.213	-	Unknown	1.19		Measured on specimen	Measured on specimen	Predicted from CBL and CAOL using an allometric regression computed in this study	-	.
Oudenodon	bainii	NHCC LB631	Anomodontia	Anomodontia	9.11	5.07	8.322	5.037	6.694	4.756	1.39	1.302	1.813	7.09	6.6795	5.725	0.830827	0.796025	0.70371	26.3808	23.295	24.24	0.695	0.651	0.9065	155.1	115.4	33115.8	-	Unknown	1.19		Measured on specimen	Calculated from ratio against CBL Measured on photograph of another specimen	Predicted from CBL and CAOL using an allometric regression computed in this study	-	.
Aulacephalodon	sp.	NHCC LB335	Anomodontia	Anomodontia	9.1185	6.0795	8.3875	5.6195	7.005	6.6715	1.306	1.356	1.415	7.599	7.0035	6.83825	0.745307	0.742375	0.304879	26.613	24.879	27.657	0.653	0.678	0.7075	253.9	173.5	143145	-	Unknown	1.19		Measured on specimen	Calculated from ratio against CBL Measured on photograph of the specimen	Predicted from CBL and CAOL using an allometric regression computed in this study	-	.
Lystrosaurus	declivis	NMQR 815	Anomodontia	Anomodontia	6.1065	3.8165	5.625	3.8825	3.951	3.753	0.906	0.95	0.908	4.9615	4.75375	3.852	0.780633	0.723597	0.312596	17.39	15.061	16.653	0.453	0.475	0.454	101.8	67.3	6276.05	-	Unknown	1.19		Measured on specimen	Calculated from ratio against CBL Measured on photograph of another specimen	Predicted from CBL and CAOL using an allometric regression computed in this study	-	.
Lystrosaurus	murrayi	NMQR 3593	Anomodontia	Anomodontia	5.654	3.45	5.4675	3.962	4.4625	4.2835	0.921	0.88	0.876	4.552	4.71475	4.373	0.792257	0.689122	0.280384	17.488	17.012	18.645	0.4605	0.44	0.438	101.6	78	8614.37	-	Unknown	1.19		Measured on specimen	Calculated from ratio against CBL Measured on photograph of another specimen	Predicted from CBL and CAOL using an allometric regression computed in this study	-	.
Sangusaurus	parringtonii	NMT RB42	Anomodontia	Anomodontia	7.88	4.44	6.21	3.69	6.84	3.68	1.329	1.31	1.54	6.16	4.95	5.26	0.826149	0.804315	0.842937	29.4	22	22	0.6645	0.655	0.77	335	154.1	153686	-	Unknown	1.19		Measured on specimen	Measured on specimen	Predicted from CBL and CAOL using an allometric regression computed in this study	-	.
Scylacocephalus	sp.	BP/1/216	Gorgonopsia	Gorgonopsia	4.06	3.09	3.5	1.5	2.96	2.05	0.68	0.62	0.6	3.575	2.5	2.505	0.648654	0.903508	0.721353	12.9	10.4	9.7	0.34	0.31	0.3	99.3	56.6	4164.77	-	Unknown	1.19		Measured on specimen	Measured on specimen	Predicted from CBL and CAOL using an allometric regression computed in this study	-	.
Lycaenops	sp.	NHCC LB178	Gorgonopsia	Gorgonopsia	6.4615	4.1835	5.82	2.72	4.71	3.29	1.112	1.06	1.14	5.3225	4.27	4	0.762108	0.88407	0.715597	17.266	14.98	17.58	0.556	0.53	0.57	206	112.9	43884.6	-	Unknown	1.19		Measured on specimen	Calculated from ratio against CBL Measured on photograph of another specimen	Predicted from CBL and CAOL using an allometric regression computed in this study	-	.
Dixeya	nasuta	GPIT/RE/7119	Gorgonopsia	Gorgonopsia	3.79	2.58	2.6005	1.6595	2.57	1.92	0.64	0.698	0.64	3.185	2.13	2.245	0.732526	0.769915	0.664732	10.93	8.22	9.5	0.32	0.349	0.32	177.4	81.6	18229.3	-	Unknown	1.19		Measured on specimen	Measured on specimen	Predicted from CBL and CAOL using an allometric regression computed in this study	-	.
Gorgonsopsia indet	-	BP/1/155	Gorgonopsia	Gorgonopsia	4.13	2.66	3.9	1.92	2.73	2.22	0.73	0.67	0.8	3.395	2.91	2.475	0.764968	0.870421	0.582003	13.4	10.6	12.1	0.365	0.335	0.4	134.7	70	9452.16	-	Unknown	1.19		Measured on specimen	Measured on specimen	Predicted from CBL and CAOL using an allometric regression computed in this study	-	.
"Aloposaurus"	-	GPIT/RE/7124	Gorgonopsia	Gorgonopsia	5.332	3.838	3.729	3.203	4.432	3.982	0.96	1.07	0.94	4.585	3.466	4.207	0.694176	0.512071	0.439044	19.908	13.598	17.47	0.48	0.535	0.47	146.1	74.5	11904.5	-	Unknown	1.19		Measured on specimen	Measured on specimen	Predicted from CBL and CAOL using an allometric regression computed in this study	-	.
Oliveirosuchus	parringtoni	BP/1/3849	Therocephalia	Therocephalia	4.39	4.03	4.758	2.65	4.14	3.3735	0.997	1.183	0.96	4.21	3.704	3.75675	0.396591	0.830542	0.579665	19	12.793	17.378	0.4985	0.5915	0.48	96.1	48.1	2815.33	-	Unknown	1.19		Measured on specimen	Measured on specimen	Predicted from CBL and CAOL using an allometric regression computed in this study	-	.
Euchambersia	mirabilis	Average (NHMUK 5696, BP/1/4009)	Therocephalia	Therocephalia	4.58	2.86	4.09	2.21	3.6	3.37	0.79	0.65	0.89	3.72	3.15	3.485	0.781061	0.841445	0.351704	14.6	12.9	16.3	0.395	0.325	0.445	102.4	54.8	4023.06	-	Unknown	1.19		Average of specimens	Calculated from ratio against CBL measured on specimen NHMUK 5696	Predicted from CBL and CAOL using an allometric regression computed in this study	-	.
-	-	NHMUK 5696	Therocephalia	Therocephalia	5.551	2.818	4.426	2.092	3.6205	3.4055	0.6368	0.4334	0.874	4.1845	3.259	3.513	0.86156	0.881244	0.339473	16.712	11.525	15.116	0.3184	0.2167	0.437	121	64.7539	-	-	-	-		Measured on specimen	Measured on specimen	-	-
-	-	BP/1/4009	Therocephalia	Therocephalia	3.6055	2.8935	3.744	2.3345	3.5735	3.34	0.9352	0.8722	0.8968	3.2495	3.03925	3.45675	0.59662	0.781799	0.355548	12.541	14.193	17.508	0.4676	0.4361	0.4484	83.7	-	-	-	-	-		Measured on specimen	-	-	-
Ictidosuchoides	sp.	NHCC LB387	Therocephalia	Therocephalia	3.62	2.05	3.1	2.06	3.09	2.53	0.74	0.78	0.83	2.835	2.58	2.81	0.8242	0.747274	0.574121	14.5	10.03	12.5	0.37	0.39	0.415	116.5	52.4	4252.9	-	Unknown	1.19		This is the maximum exposed length of the specimen. The snout is not fully exposed in the block of sediment, though, so it is an understimate of the original length.	Measured on specimen	Predicted from CBL and CAOL using an allometric regression computed in this study	-	.
Mupashi	migrator	NHCC LB44	Therocephalia	Therocephalia	3.177	2.5625	2.825	1.7825	2.8725	2.4305	0.8	0.859	0.852	2.86975	2.30375	2.6515	0.591127	0.775804	0.532981	11.034	9.354	11.308	0.4	0.4295	0.426	91	46.7	2476.4	-	Unknown	1.19		Measured on specimen	Measured on specimen	Predicted from CBL and CAOL using an allometric regression computed in this study	-	.
Microgomphodon	oligocynus	SAM-PK-10160	Therocephalia	Therocephalia	3.681	1.858	3.661	2.2065	3.191	1.682	0.645	0.595	0.732	2.7695	2.93375	2.4365	0.863263	0.797965	0.849799	9.913	10.598	11.66	0.3225	0.2975	0.366	87	59.8	4008.07	-	Unknown	1.19		Measured on specimen	Calculated from ratio against CBL Measured on photograph of another specimen	Predicted from CBL and CAOL using an allometric regression computed in this study	-	.
Choerosaurus	dejageri	SAM-PK-K8797	Therocephalia	Therocephalia	2.5295	2.119	2.521	1.7805	2.726	1.5485	0.521	0.549	0.584	2.32425	2.15075	2.13725	0.546108	0.707945	0.822995	7.804	6.663	9.011	0.2605	0.2745	0.292	93.1	40.1	1830.01	-	Unknown	1.19		Measured on specimen	Measured on specimen	Predicted from CBL and CAOL using an allometric regression computed in this study	-	.
Procynosuchus	delaharpeae	NHMUK R37054	NPC	NPC	3.96	2.93	3.41	2.115	2.645	2.6	0.61	0.64	0.66	3.445	2.7625	2.6225	0.672718	0.784416	0.183676	12.07	10.37	11.6	0.305	0.32	0.33	85.5	41	1714.37	-	Unknown	1.19		Estimated from the preserved part of the specimen	Estimated from the preserved part of the specimen	Predicted from CBL and CAOL using an allometric regression computed in this study	-	.
Cynosaurus	suppostus	Average (BP/1/1563, BP/1/3926)	NPC	NPC	3.45275	2.187	3.00175	1.5635	2.80025	2.3545	0.504	0.515	0.525	2.81987	2.28263	2.57737	0.773818	0.85364	0.541318	10.1495	7.9185	10.176	0.252	0.2575	0.2625	82.8	46.8	2192.62	-	Unknown	1.19		Average of specimens	Calculated from ratio against CBL Measured on photograph of another specimen	Predicted from CBL and CAOL using an allometric regression computed in this study	-	.
-	-	BP/1/1563	NPC	NPC	2.765	1.7735	2.418	1.3515	2.4765	1.88	0.594	0.584	0.598	2.26925	1.88475	2.17825	0.767198	0.829213	0.650932	7.971	6.467	8.525	0.297	0.292	0.299	49.7	-	-	-	-	-		Measured on specimen	-	-	-
-	-	BP/1/3926	NPC	NPC	4.1405	2.6005	3.5855	1.7755	3.124	2.829	0.414	0.446	0.452	3.3705	2.6805	2.9765	0.778161	0.868785	0.424197	12.328	9.37	11.827	0.207	0.223	0.226	115.8	-	-	-	-	-		Measured on specimen	-	-	-
Galesaurus	planiceps	NMQR 860	NPC	NPC	3.18	1.96	2.83	1.78	2.68	2.42	0.72	0.8	1.02	2.57	2.305	2.55	0.787471	0.777425	0.429672	9.3	7	11.7	0.36	0.4	0.51	93.4	60.3	4363.45	-	Unknown	1.19		Measured on specimen	Calculated from ratio against CBL Measured on photograph of another specimen	Predicted from CBL and CAOL using an allometric regression computed in this study	-	.
Thrinaxodon	liorhinus	Average (BP/1/4263, BP/1/7199)	NPC	NPC	2.66975	1.70175	2.73625	1.8545	2.501	1.85275	0.3735	0.4205	0.5175	2.18575	2.29537	2.17687	0.752374	0.735011	0.669775	6.46	8.0905	10.218	0.18675	0.21025	0.25875	71.7	40.9	1376.44	-	Unknown	1.19		Average of specimens	Calculated from ratio against CBL Measured on photograph of another specimen	Predicted from CBL and CAOL using an allometric regression computed in this study	-	.
-	-	BP/1/4263	NPC	NPC	2.3485	1.7315	2.6135	1.787	2.526	1.7935	0.391	0.409	0.567	2.04	2.20025	2.15975	0.675588	0.729709	0.704186	5	8.507	10.898	0.1955	0.2045	0.2835	70.88	-	-	-	-	-		Measured on specimen	-	-	-
-	-	BP/1/7199	NPC	NPC	2.991	1.672	2.859	1.922	2.476	1.912	0.356	0.432	0.468	2.3315	2.3905	2.194	0.829161	0.740312	0.635363	7.92	7.674	9.538	0.178	0.216	0.234	72.54	-	-	-	-	-		Measured on specimen	-	-	-
Trirachodon	berryi	BP/1/4658	NPC	NPC	3.919	2.2505	3.169	2.469	3.0815	2.5595	0.621	0.575	0.644	3.08475	2.819	2.8205	0.818677	0.626887	0.556867	11.657	10.137	11.776	0.3105	0.2875	0.322	101.5	60.9	4881.61	-	Unknown	1.19		Measured on specimen	Measured on specimen	Predicted from CBL and CAOL using an allometric regression computed in this study	-	.
Cricodon	kannemeyeri	AM 461	NPC	NPC	4.41	2.28	2.3	3.11	3.76	2.18	0.44	0.43	0.75	3.345	2.705	2.97	0.855981	0.673102	0.814768	10.4	9.6	11.8	0.22	0.215	0.375	93	53	3260.11	-	Unknown	1.19		Measured on specimen	Measured on specimen	Predicted from CBL and CAOL using an allometric regression computed in this study	-	.
Scalenodon	angustifrons	NMT RB581	NPC	NPC	3.77	1.99	3.79	2.06	4.01	2.96	0.658	0.742	0.844	2.88	2.925	3.485	0.849337	0.839386	0.674632	10.3	9.6	13.2	0.329	0.371	0.422	142	79	12739.5	-	Unknown	1.19		Measured on specimen	Measured on specimen	Predicted from CBL and CAOL using an allometric regression computed in this study	-	.
Massethognathus	pascuali	BP/1/4245	NPC	NPC	2.965	1.92	2.99	2.16	2.745	1.76	0.48	0.49	0.45	2.4425	2.575	2.2525	0.762019	0.691467	0.767402	8.72	8.3	10.49	0.24	0.245	0.225	89.2	58	3771.21	-	Unknown	1.19		Estimated from the preserved portion of the specimen and based on the Brink 1963 reconstruction	Estimated from the preserved portion of the specimen and based on the Brink 1963 reconstruction	Predicted from CBL and CAOL using an allometric regression computed in this study	-	.
Luangwa	drysdalli	NHMUK R36995	NPC	NPC	5.383	4.1705	4.2125	2.9305	3.6435	3.3225	0.849	0.812	0.712	4.77675	3.5715	3.483	0.632263	0.718364	0.410417	14.317	12.099	13.343	0.4245	0.406	0.356	109	71.1	7422.34	-	Unknown	1.19		Measured on specimen	Calculated from ratio against CBL Measured on photograph of another specimen	Predicted from CBL and CAOL using an allometric regression computed in this study	-	.
Lumkuia	fuzzi	BP/1/2669	NMP	NMP	2.3835	1.7675	2.3685	1.6485	2.317	1.8645	0.51	0.579	0.528	2.0755	2.0085	2.09075	0.67089	0.718032	0.593676	7.434	7.336	8.818	0.255	0.2895	0.264	59.1	40.2	1028.95	-	Unknown	1.19		Measured on specimen	Measured on specimen	Predicted from CBL and CAOL using an allometric regression computed in this study	-	.
Chiniquodon	theotenicus	MCZ 3778	NMP	NMP	4.74	2.09	3.7	1.5	4.92	2.19	0.696	0.572	1.01	3.415	2.6	3.555	0.897542	0.914137	0.89547	12.3	8.9	9.9	0.348	0.286	0.505	133	79.2	11474.5	-	Unknown	1.19		Measured on specimen	Calculated from ratio against CBL Measured on photograph of another specimen	Predicted from CBL and CAOL using an allometric regression computed in this study	-	.
Riograndia	guaibensis	UFRGS PV833T	NMP	NMP	1.3025	0.7395	1.2585	0.9085	1.1645	0.9835	0.441	0.441	0.422	1.021	1.0835	1.074	0.823198	0.692007	0.535448	4.297	3.906	4.788	0.2205	0.2205	0.211	33	20.1	113.09	-	Unknown	1.19		Measured on specimen	Calculated from ratio against CBL Measured on photograph of another specimen	Predicted from CBL and CAOL using an allometric regression computed in this study	-	.
Tritylodon	longaevus	Average (BP/1/5088, BP/1/4778)	NMM	NMM	2.52775	1.80975	2.059	2.33275	1.968	1.782	0.437	0.4245	0.514	2.16875	2.19588	1.875	0.698159	0.588059	0.416056	8.117	7.7215	8.0885	0.2185	0.21225	0.257	135.5	99.1	18844.2	-	Unknown	1.19		Average of specimens	Calculated from ratio against CBL measured on specimen BP/1/5089A	Predicted from CBL and CAOL using an allometric regression computed in this study	-	.
-	-	BP/1/5088	NMM	NMM	2.632	1.885	1.906	1.6535	1.9485	1.83	0.395	0.46	0.5	2.2585	1.77975	1.88925	0.69791	0.497396	0.343414	8.292	7.685	7.949	0.1975	0.23	0.25	142.7	102.744	-	-	-	-		Measured on specimen	Calculated from ratio against CBL measured on specimen BP/1/5089A	-	-
-	-	BP/1/4778	NMM	NMM	2.4235	1.7345	2.212	3.012	1.9875	1.734	0.479	0.389	0.528	2.079	2.612	1.86075	0.698407	0.678722	0.488698	7.942	7.758	8.228	0.2395	0.1945	0.264	128.3	92.376	-	-	-	-		Measured on specimen	Calculated from ratio against CBL measured on specimen BP/1/5089A	-	-
Oligokyphus	major	NHMUK 7090	NMM	NMM	1.482	0.9975	1.109	0.9175	1.2545	1.1185	0.325	0.316	0.42	1.23975	1.01325	1.1865	0.739572	0.561728	0.452843	5.126	4.221	4.982	0.1625	0.158	0.21	70	44.9	1559.42	-	Unknown	1.19		Based on Kühne 1956 reconstruction	Calculated from ratio against CBL Measured on photograph of another specimen	Predicted from CBL and CAOL using an allometric regression computed in this study	-	.
Pseudotherium	argentinus	PVSJ 882	NMM	NMM	2.329	1.23	1.6295	1.2375	1.5125	1.3255	0.303	0.32	0.373	1.7795	1.4335	1.419	0.849167	0.650583	0.48165	6.595	5.204	5.593	0.1515	0.16	0.1865	69.63	35.4	926.875	-	Unknown	1.19		Measured on specimen	Measured on specimen	Predicted from CBL and CAOL using an allometric regression computed in this study	-	.
Brasilodon	quadrangularis	UFRGS PV1043	NMM	NMM	1.27	0.9225	1.09	0.7225	1.1135	0.908	0.285	0.301	0.361	1.09625	0.90625	1.01075	0.687295	0.748757	0.578832	4.215	3.263	4.337	0.1425	0.1505	0.1805	38	22.8	174.709	-	Unknown	1.19		Measured on specimen	Calculated from ratio against CBL Measured on photograph of another specimen	Predicted from CBL and CAOL using an allometric regression computed in this study	-	.
Megazostrodon	rudnerae	BP/1/4983	NMM	NMM	1.2065	0.8405	0.875	0.68	0.8785	0.7185	0.14	0.16	0.15	1.0235	0.7775	0.7985	0.717418	0.629324	0.575401	3.494	2.85	3.278	0.07	0.08	0.075	29.8	18	78.392	-	Unknown	1.19		Measured on specimen	Calculated from ratio against CBL Measured on a reconstruction of the skull	Predicted from CBL and CAOL using an allometric regression computed in this study	-	.
Morganucodon	watsoni	UMZC Eo.CR.22	NMM	NMM	0.948	0.7605	0.777	0.574	0.729	0.716	0.2	0.202	0.269	0.85425	0.6755	0.7225	0.597035	0.673992	0.188009	3.02	2.598	2.538	0.1	0.101	0.1345	24.5	13.5049	33.3947	-	Unknown	1.19		Estimated based on mandibular length and relation with CBL in M. oehleri	Estimated from M. oehleri	Predicted from CBL and CAOL using an allometric regression computed in this study	-
Morganucodon	oehleri	Average (IVPP V8685, BMNH 2858)	NMM	NMM	0.938	0.774	0.73825	0.55575	0.75225	0.661	0.165	0.1735	0.1825	0.856	0.647	0.706625	0.564899	0.658256	0.477379	3.2435	2.26	2.7465	0.0825	0.08675	0.09125	20.5	11.3	18.4163	-	Unknown	1.19		Average of specimens	Calculated from ratio against CBL measured on specimen IVPP V8685	Predicted from CBL and CAOL using an allometric regression computed in this study	-	.
-	-	IVPP V8685	NMM	NMM	0.7975	0.639	0.5295	0.458	0.6235	0.4845	0.12	0.123	0.156	0.71825	0.49375	0.554	0.598324	0.501829	0.62942	2.707	1.763	2.06	0.06	0.0615	0.078	17.5	9.64634	-	-	-	-		Measured on specimen	Measured on specimen	-	-
-	-	BMNH 2858	NMM	NMM	1.0785	0.909	0.947	0.6535	0.881	0.8375	0.21	0.224	0.209	0.99375	0.80025	0.85925	0.538168	0.723739	0.310344	3.78	2.757	3.433	0.105	0.112	0.1045	23.5	-	-	-	-	-		Measured on specimen	-	-	-
Haldanodon	exspectatus	MG 6721	NMM	NMM	1.105	0.905	0.862	0.592	0.7825	0.6835	0.233	0.229	0.245	1.005	0.727	0.733	0.573787	0.72687	0.486856	3.691	2.433	2.889	0.1165	0.1145	0.1225	36.86	22.8261	167.824	-	Unknown	1.19		Ruf, I., Luo, Z.X. and Martin, T., 2013. Reinvestigation of the basicranium of Haldanodon exspectatus (Mammaliaformes, Docodonta). Journal of Vertebrate Paleontology, 33(2), pp.382-400.	Measured on specimen	Predicted from CBL and CAOL using an allometric regression computed in this study	-	.
Hadrocodium	wui	IVPP V8275	NMM	NMM	0.7235	0.4455	0.507	0.4745	0.6095	0.5705	0.207	0.211	0.214	0.5845	0.49075	0.59	0.787936	0.352273	0.351965	2.388	2.072	2.484	0.1035	0.1055	0.107	13.2	8.5	5.7131	-	Unknown	1.19		Measured on specimen	Measured on specimen	Predicted from CBL and CAOL using an allometric regression computed in this study	-	.
Tachyglossus	aculeatus	MS86	Mammalia	Monotremata	2.64	2.4	2.135	2.105	1.785	1.66	0.34	0.34	0.34	2.52	2.12	1.7225	0.416598	0.16705	0.36763	9.04	8.24	5.89	0.17	0.17	0.17	108.5	58.4	3670	31.4	Endotherm	1.19		Measured on specimen	Calculated from ratio against CBL Measured on photograph of another specimen	Taken as average from https://eol.org/terms/search_results?tq%5Bc%5D=323859&tq%5Bf%5D%5B0%5D%5Bp%5D=260&tq%5Bf%5D%5B0%5D%5Bps%5D%5B%5D%5Bt%5D=predicate&tq%5Bf%5D%5B0%5D%5Bps%5D%5B%5D%5Bp%5D=260&tq%5Bf%5D%5B0%5D%5Brp%5D=260&tq%5Bf%5D%5B0%5D%5Bu%5D=924&tq%5Br%5D=record	Stewart Nicol, Niels A.Andersen. Body temperature as an indicator of egg-laying in the echidna, Tachyglossus aculeatus. Journal of Thermal Biology Volume 31, Issue 6, August 2006, Pages 483-490	.
Zaglossus	bartoni smeenki	AMNH 157072	Mammalia	Monotremata	2.4995	1.693	1.658	1.6305	2.1685	1.6295	0.66	0.62	0.67	2.09625	1.64425	1.899	0.735674	0.181376	0.6598	8.766	7.594	7.491	0.33	0.31	0.335	161	60.07	10000	31	Endotherm	1.19		Measured on specimen (scan)	Measured on specimen (scan)	Grigg, G.C., Beard, L.A., Barnes, J.A., Perry, L.I., Fry, G.J. and Hawkins, M., 2003. Body temperature in captive long-beaked echidnas (Zaglossus bartoni). Comparative Biochemistry and Physiology Part A: Molecular & Integrative Physiology, 136(4), pp.911-916.	Grigg, G.C., Beard, L.A., Barnes, J.A., Perry, L.I., Fry, G.J. and Hawkins, M., 2003. Body temperature in captive long-beaked echidnas (Zaglossus bartoni). Comparative Biochemistry and Physiology Part A: Molecular & Integrative Physiology, 136(4), pp.911-916.	.
Ornithorhynchus	anatinus	CEB-130091	Mammalia	Monotremata	2.815	1.7825	2.403	1.862	1.9295	1.747	0.3674	0.4024	0.4478	2.29875	2.1325	1.83825	0.773976	0.632127	0.424526	7.655	8.619	8.935	0.1837	0.2012	0.2239	93.2	38.6	1752	34	Endotherm	1.19		Measured on AMNH 200255	Calculated from ratio against CBL Measured on photograph of another specimen	Taken as average from https://eol.org/terms/search_results?tq%5Bc%5D=323858&tq%5Bf%5D%5B0%5D%5Bp%5D=260&tq%5Bf%5D%5B0%5D%5Bps%5D%5B%5D%5Bt%5D=predicate&tq%5Bf%5D%5B0%5D%5Bps%5D%5B%5D%5Bp%5D=260&tq%5Bf%5D%5B0%5D%5Brp%5D=260&tq%5Bf%5D%5B0%5D%5Bu%5D=924&tq%5Br%5D=record	McNab, B. 1970. Body Weight and the Energetics of Temperature Regulation. Journal of Experimental Biology, 53:329-348.	.
Dryolestes	leiriensis	MG 6807 (Gui Mam 2/81)	Mammalia	Fossil Mammalia	1.295	1.205	0.9895	0.822	1.039	0.8325	0.173	0.165	0.2	1.25	0.90575	0.93575	0.366287	0.556687	0.598328	5.036	3.58	4.107	0.0865	0.0825	0.1	40	15	300	-	Unknown	1.19		Estimated from the preserved portion of the specimen and based on the size of the mandible of Dryolestes priscus type specimen	Estimated from the preserved portion of the specimen and based on Dryolestes leiriensis mandible (Martin T. 1999. Dryolestidae (Dryolestoidea, Mammalia) aus dem Oberen Jura von Portugal. Abhandlungen der senckenbergischen naturforschenden Gesellschaft 550: 1–119).	Martin, T., 1999. Dryolestidae (Dryolestoidea, Mammalia) aus dem Oberen Jura-von Portugal. abhandlungen der senckenbergischen naturforschenden gesellschaft 550, 1-119	-	.
Dasyurus	viverrinus	CEB-130081	Mammalia	Marsupialia	1.93	1.81	1.75	1.44	1.35	1.31	0.25	0.26	0.25	1.87	1.595	1.33	0.347112	0.568248	0.241622	7.6	7.4	4.9	0.125	0.13	0.125	76.9	52.1	982	35.9	Endotherm	1.19		Measured on specimen	Calculated from ratio against CBL Measured on photograph of another specimen	Ekdale EG (2013) Comparative Anatomy of the Bony Labyrinth (Inner Ear) of Placental Mammals. PLoS ONE 8(6): e66624.	McNab, B. 1970. Body Weight and the Energetics of Temperature Regulation. Journal of Experimental Biology, 53:329-348.	.
Isoodon	obesulus	CEB-130085	Mammalia	Marsupialia	1.794	1.758	1.5305	1.119	1.1845	1.154	0.199	0.219	0.228	1.776	1.32475	1.16925	0.199327	0.682234	0.225467	6.319	5.206	4.847	0.0995	0.1095	0.114	74	38.7	1058	33.9	Endotherm	1.19		Measured on specimen	Calculated from ratio against CBL Measured on photograph of another specimen	Spoor, F., Garland, T., Krovitz, G., Ryan, T.M., Silcox, M.T. and Walker, A., 2007. The primate semicircular canal system and locomotion. Proceedings of the National Academy of Sciences, 104(26), pp.10808-10812.	Withers, P., Thompson, G. & Seymour, R. 2000. Metabolic physiology of the north-western marsupial mole, Notoryctes caurinus (Marsupialia : Notoryctidae). Australian Journal of Zoology, 48:241-258.	.
Phascolarctos	cinereus	CEB-130095	Mammalia	Marsupialia	2.6	2.55	2.8	2.08	2.33	1.97	0.35	0.37	0.42	2.575	2.44	2.15	0.195171	0.66945	0.533986	9.4	10.3	8.4	0.175	0.185	0.21	110	77.9	6957	35.8	Endotherm	1.19		Measured on specimen	Calculated from ratio against CBL Measured on photograph of another specimen	Kate E. Jones, Jon Bielby, Marcel Cardillo, Susanne A. Fritz, Justin O'Dell, C. David L. Orme, Kamran Safi, Wes Sechrest, Elizabeth H. Boakes, Chris Carbone, Christina Connolly, Michael J. Cutts, Janine K. Foster, Richard Grenyer, Michael Habib, Christopher A. Plaster, Samantha A. Price, Elizabeth A. Rigby, Janna Rist, Amber Teacher, Olaf R. P. Bininda-Emonds, John L. Gittleman, Georgina M. Mace,…	Withers, P., Thompson, G. & Seymour, R. 2000. Metabolic physiology of the north-western marsupial mole, Notoryctes caurinus (Marsupialia : Notoryctidae). Australian Journal of Zoology, 48:241-258.	.
Monodelphis	domestica	TMM-M-7599	Mammalia	Marsupialia	1.14	1.12	1.08	0.86	0.88	0.82	0.16	0.13	0.16	1.13	0.97	0.85	0.186494	0.604907	0.362925	3.9	3.7	3.3	0.08	0.065	0.08	42.8	28.4	93.5	34.3	Endotherm	1.19		Measured on specimen	Calculated from ratio against CBL Measured on photograph of another specimen	Kate E. Jones, Jon Bielby, Marcel Cardillo, Susanne A. Fritz, Justin O'Dell, C. David L. Orme, Kamran Safi, Wes Sechrest, Elizabeth H. Boakes, Chris Carbone, Christina Connolly, Michael J. Cutts, Janine K. Foster, Richard Grenyer, Michael Habib, Christopher A. Plaster, Samantha A. Price, Elizabeth A. Rigby, Janna Rist, Amber Teacher, Olaf R. P. Bininda-Emonds, John L. Gittleman, Georgina M. Mace,…	Withers, P., Thompson, G. & Seymour, R. 2000. Metabolic physiology of the north-western marsupial mole, Notoryctes caurinus (Marsupialia : Notoryctidae). Australian Journal of Zoology, 48:241-258.	.
Didelphis	virginiana	TMM-M-2517	Mammalia	Marsupialia	1.77	1.5	1.39	1.18	1.19	1.04	0.23	0.19	0.27	1.635	1.285	1.115	0.530863	0.52852	0.486017	6.4	5	4.5	0.115	0.095	0.135	107	67	2800	35	Endotherm	1.19		Measured on specimen (scan)	Calculated from ratio against CBL Measured on photograph of another specimen	Ekdale EG (2013) Comparative Anatomy of the Bony Labyrinth (Inner Ear) of Placental Mammals. PLoS ONE 8(6): e66624.	McNab, B. 1970. Body Weight and the Energetics of Temperature Regulation. Journal of Experimental Biology, 53:329-348.	.
Dasypus	novemcinctus	TMM-M-1885	Mammalia	Atlantogenata	2.485	1.9865	2.2175	2.122	1.889	1.6695	0.276	0.228	0.287	2.23575	2.16975	1.77925	0.600804	0.290307	0.467863	9.67	10.531	8.591	0.138	0.114	0.1435	86.4	45	4754	34.5	Endotherm	1.19		Measured on specimen (scan)	Calculated from ratio against CBL Measured on photograph of another specimen	Ekdale EG (2013) Comparative Anatomy of the Bony Labyrinth (Inner Ear) of Placental Mammals. PLoS ONE 8(6): e66624.	McNab, B. 1970. Body Weight and the Energetics of Temperature Regulation. Journal of Experimental Biology, 53:329-348.	.
Procavia	capensis	CEB-150012	Mammalia	Atlantogenata	2.5105	1.786	2.641	1.8645	2.063	1.6195	0.325	0.368	0.377	2.14825	2.25275	1.84125	0.702775	0.708229	0.619468	9.668	9.058	8.41	0.1625	0.184	0.1885	75.9	56.6	3800	38	Endotherm	1.19		Measured on specimen (scan)	Calculated from ratio against CBL Measured on photograph of another specimen	Ekdale EG (2013) Comparative Anatomy of the Bony Labyrinth (Inner Ear) of Placental Mammals. PLoS ONE 8(6): e66624.	McNab, B. 1970. Body Weight and the Energetics of Temperature Regulation. Journal of Experimental Biology, 53:329-348.	.
Elephas	maximus	CEB-150009	Mammalia	Atlantogenata	7.115	5.091	5.8375	5.037	5.631	4.089	1.61	1.662	1.458	6.103	5.43725	4.86	0.698581	0.505427	0.687527	22.045	22.524	19.402	0.805	0.831	0.729	660	422.6	3450000	35.9	Endotherm	1.19		Measured on specimen	Calculated from ratio against CBL Measured on photograph of another specimen	Spoor, F., Garland, T., Krovitz, G., Ryan, T.M., Silcox, M.T. and Walker, A., 2007. The primate semicircular canal system and locomotion. Proceedings of the National Academy of Sciences, 104(26), pp.10808-10812.	Busse, S., Lutter, D., Heldmaier, G., Jastroch, M. and Meyer, C.W., 2014. Torpor at high ambient temperature in a neotropical didelphid, the grey short-tailed opossum (Monodelphis domestica). Naturwissenschaften, 101(11), pp.1003-1006.	.
Dugong	dugon	UM N-170	Mammalia	Atlantogenata	3.335	3.065	2.965	2.73	3.175	2.965	0.42	0.52	0.5	3.2	2.8475	3.07	0.394163	0.390172	0.357643	9.64	9	11.37	0.21	0.26	0.25	340	243.1	420000	-	Endotherm	1.19		Measured on specimen	Calculated from ratio against CBL Measured on photograph of another specimen	Smith, F.A., Lyons, S.K., Ernest, S.K.M., Jones, K.E., Kaufman, D.M., Dayan, T., Marquet, P.A., Brown, J.H. and Haskell, J.P. (2003), BODY MASS OF LATE QUATERNARY MAMMALS. Ecology, 84: 3403-3403.	-	.
Trichechus	manatus	MSW03156	Mammalia	Atlantogenata	3.23	3.19	4.26	4.13	4.7	3.96	0.55	0.5	0.5	3.21	4.195	4.33	0.15689	0.245156	0.538613	14.6	13	14.5	0.275	0.25	0.25	347	269	500000	35.4	Endotherm	1.19		Measured on skull on Skullsite	Calculated from ratio against CBL Measured on photograph of another specimen	Ekdale EG (2013) Comparative Anatomy of the Bony Labyrinth (Inner Ear) of Placental Mammals. PLoS ONE 8(6): e66624.	Molly E. Martony, Ramiro Isaza, Claire D. Erlacher-Reid, Jon Peterson, and Nicole I. Stacy ESOPHAGEAL MEASUREMENT OF CORE BODY TEMPERATURE IN THE FLORIDA MANATEE (TRICHECHUS MANATUS LATIROSTRIS) Journal of Wildlife Diseases 2020, Vol. 56, No. 1, pp. 27-33	.
Orycteropus	afer	AMNH51909	Mammalia	Atlantogenata	3.941	3.2435	4.636	3.5445	4.207	3.2025	0.449	0.478	0.5	3.59225	4.09025	3.70475	0.56802	0.644553	0.64848	14.841	20.107	19.172	0.2245	0.239	0.25	245	110.6	60000	34.5	Endotherm	1.19		Measured on specimen (scan)	Calculated from ratio against CBL Measured on photograph of another specimen	Ekdale EG (2013) Comparative Anatomy of the Bony Labyrinth (Inner Ear) of Placental Mammals. PLoS ONE 8(6): e66624.	Clarke A.& Johnston N. M.. 1999Scaling of metabolic rate with body mass and temperature in teleost fish. J. Anim. Ecol. 68, 893–905.	.
Chrysochloris	sp.	AMNH82372	Mammalia	Atlantogenata	1.27	0.87	0.88	0.59	0.83	0.73	0.14	0.14	0.14	1.07	0.735	0.78	0.728506	0.741951	0.475865	3.8	2.93	2.84	0.07	0.07	0.07	23.9	13.7	44.4	34	Endotherm	1.19		Measured on specimen (scan)	Calculated from ratio against CBL Measured on photograph of another specimen	Ekdale EG (2013) Comparative Anatomy of the Bony Labyrinth (Inner Ear) of Placental Mammals. PLoS ONE 8(6): e66624.	Clarke A.& Johnston N. M.. 1999Scaling of metabolic rate with body mass and temperature in teleost fish. J. Anim. Ecol. 68, 893–905.	.
Hemicentetes	semispinosus	AMNH161535	Mammalia	Atlantogenata	1.11	1	1.07	0.75	0.82	0.68	0.14	0.14	0.16	1.055	0.91	0.75	0.434025	0.713226	0.558851	3.6	3.4	2.9	0.07	0.07	0.08	30.6	18.4	110	-	Endotherm	1.19		Measured on specimen (scan)	Calculated from ratio against CBL Measured on photograph of another specimen	Ekdale EG (2013) Comparative Anatomy of the Bony Labyrinth (Inner Ear) of Placental Mammals. PLoS ONE 8(6): e66624.	-	.
Elephantulus	sp.	MNHN.AC.ZM.1930-92	Mammalia	Atlantogenata	1.36	1.28	1.36	0.9	1.29	0.96	0.26	0.24	0.27	1.32	1.13	1.125	0.337915	0.749712	0.667972	5.6	5.3	4.7	0.13	0.12	0.135	30.4	18.9	57	37.26	Endotherm	1.19		Measured on specimen (scan)	Calculated from ratio against CBL Measured on photograph of another specimen	Kate E. Jones, Jon Bielby, Marcel Cardillo, Susanne A. Fritz, Justin O'Dell, C. David L. Orme, Kamran Safi, Wes Sechrest, Elizabeth H. Boakes, Chris Carbone, Christina Connolly, Michael J. Cutts, Janine K. Foster, Richard Grenyer, Michael Habib, Christopher A. Plaster, Samantha A. Price, Elizabeth A. Rigby, Janna Rist, Amber Teacher, Olaf R. P. Bininda-Emonds, John L. Gittleman, Georgina M. Mace,…	White, C. & Seymour, R. 2003. Mammalian basal metabolic rate is proportional to body mass2/3. PNAS, 100:4046-4049.	.
Macroscelides	proboscideus	AMNH161535	Mammalia	Atlantogenata	1.42	1.32	1.29	0.94	1.39	0.95	0.16	0.18	0.18	1.37	1.115	1.17	0.368627	0.684852	0.729994	4.5	4.3	4.6	0.08	0.09	0.09	32.3	20.8	38.4	36.2	Endotherm	1.19		Measured on specimen (scan)	Calculated from ratio against CBL Measured on photograph of another specimen	Ekdale EG (2013) Comparative Anatomy of the Bony Labyrinth (Inner Ear) of Placental Mammals. PLoS ONE 8(6): e66624.	Clarke A.& Johnston N. M.. 1999Scaling of metabolic rate with body mass and temperature in teleost fish. J. Anim. Ecol. 68, 893–905.	.
Cavia	porcellus	TMM-M-7283	Mammalia	Euarchontoglires	2.328	1.779	1.86	1.599	2.17	1.547	0.181	0.241	0.241	2.0535	1.7295	1.8585	0.645009	0.510837	0.701262	7.274	6.655	8.084	0.0905	0.1205	0.1205	67.8	41.1	728	39	Endotherm	1.19		Measured on specimen (scan)	Calculated from ratio against CBL Measured on photograph of another specimen	Ekdale EG (2013) Comparative Anatomy of the Bony Labyrinth (Inner Ear) of Placental Mammals. PLoS ONE 8(6): e66624.	Clarke A.& Johnston N. M.. 1999Scaling of metabolic rate with body mass and temperature in teleost fish. J. Anim. Ecol. 68, 893–905.	.
Sciurus	vulgaris	CEB-130021	Mammalia	Euarchontoglires	2.47	2.17	2.05	1.71	1.84	1.82	0.22	0.23	0.27	2.32	1.88	1.83	0.477664	0.551543	0.147041	9.5	7.7	8.5	0.11	0.115	0.135	53	35.4	322	39	Endotherm	1.19		Measured on another adult specimen	Calculated from ratio against CBL Measured on photograph of another specimen	Spoor, F., Garland, T., Krovitz, G., Ryan, T.M., Silcox, M.T. and Walker, A., 2007. The primate semicircular canal system and locomotion. Proceedings of the National Academy of Sciences, 104(26), pp.10808-10812.	Dausmann, K., Wein, J., Turner, J. & Glos, J. 2013. Absence of heterothermy in the European red squirrel (Sciurus vulgaris). Mammalian Biology, 78:332-335.	.
Mus	musculus	TMM-M-3196	Mammalia	Euarchontoglires	0.97	0.74	0.81	0.59	0.68	0.59	0.1	0.08	0.11	0.855	0.7	0.635	0.646532	0.685157	0.497181	3.2	2.7	2.7	0.05	0.04	0.055	20.8	14.1	15.5	36.7	Endotherm	1.19		Measured on specimen	Calculated from ratio against CBL Measured on photograph of another specimen	Ekdale EG (2013) Comparative Anatomy of the Bony Labyrinth (Inner Ear) of Placental Mammals. PLoS ONE 8(6): e66624.	Clarke A.& Johnston N. M.. 1999Scaling of metabolic rate with body mass and temperature in teleost fish. J. Anim. Ecol. 68, 893–905.	.
Lepus	californicus	TMM-M-7500	Mammalia	Euarchontoglires	2.44	2.41	1.82	1.59	1.84	1.72	0.21	0.22	0.25	2.425	1.705	1.78	0.15633	0.486597	0.35522	9.6	6.7	7.1	0.105	0.11	0.125	94.4	56	2350	39.2	Endotherm	1.19		Measured on specimen (scan)	Calculated from ratio against CBL Measured on photograph of another specimen	Ekdale EG (2013) Comparative Anatomy of the Bony Labyrinth (Inner Ear) of Placental Mammals. PLoS ONE 8(6): e66624.	McNab, B. 1970. Body Weight and the Energetics of Temperature Regulation. Journal of Experimental Biology, 53:329-348.	.
Sylvilagus	floridanus	TMM-M-2689	Mammalia	Euarchontoglires	1.985	1.94	1.545	1.455	1.52	1.35	0.19	0.19	0.18	1.9625	1.5	1.435	0.211722	0.336321	0.459538	7.84	6.71	6.43	0.095	0.095	0.09	68.7	42	1160	38.3	Endotherm	1.19		Measured on specimen (scan)	Calculated from ratio against CBL Measured on photograph of another specimen	Ekdale EG (2013) Comparative Anatomy of the Bony Labyrinth (Inner Ear) of Placental Mammals. PLoS ONE 8(6): e66624.	Clarke A.& Johnston N. M.. 1999Scaling of metabolic rate with body mass and temperature in teleost fish. J. Anim. Ecol. 68, 893–905. Based on Sylvilagus audubonii	.
Oryctolagus	cuniculus	CEB-130035	Mammalia	Euarchontoglires	2.5925	2.2405	2.001	1.662	2.019	1.8095	0.29	0.3	0.31	2.4165	1.8315	1.91425	0.503108	0.556892	0.443578	9.8	8.5	9.4	0.145	0.15	0.155	69.8	44.2	1740	39	Endotherm	1.19		Measured on specimen	Calculated from ratio against CBL Measured on photograph of another specimen	Spoor, F., Garland, T., Krovitz, G., Ryan, T.M., Silcox, M.T. and Walker, A., 2007. The primate semicircular canal system and locomotion. Proceedings of the National Academy of Sciences, 104(26), pp.10808-10812.	Hart, J. 1971. Rodents. in Comparative physiology of thermoregulation, ed. Whittow, G. C. Academic, New York, Vol. II, 1-149.	.
Tupaia	javanica	CEB-130099	Mammalia	Euarchontoglires	1.58	1.43	1.6	0.99	1.44	1.13	0.23	0.23	0.26	1.505	1.295	1.285	0.425277	0.785588	0.619848	6.6	5.9	6.067	0.115	0.115	0.13	43	27.6	120	36.4	Endotherm	1.19		Measured on specimen	Calculated from ratio against CBL Measured on photograph of another specimen	Taken as average from Tupaia glis https://eol.org/terms/search_results?tq%5Bc%5D=327851&tq%5Bf%5D%5B0%5D%5Bp%5D=260&tq%5Bf%5D%5B0%5D%5Bps%5D%5B%5D%5Bt%5D=predicate&tq%5Bf%5D%5B0%5D%5Bps%5D%5B%5D%5Bp%5D=260&tq%5Bf%5D%5B0%5D%5Brp%5D=260&tq%5Bf%5D%5B0%5D%5Bu%5D=924&tq%5Br%5D=record Scaled using CBL	Bradley, S. & Hudson, J. 1974. Temperature Regulation in the Tree Shrew Tupaia glis. Comparative Biochemistry and Physiology, 48:55-60.	.
Tupaia	glis	TMM-M-2256	Mammalia	Euarchontoglires	1.9675	1.7495	2.0185	1.451	1.9805	1.4665	0.177	0.173	0.171	1.8585	1.73475	1.7235	0.45752	0.695165	0.67209	7.622	7.077	8.806	0.0885	0.0865	0.0855	49.6	28.7	131	36.4	Endotherm	1.19		Measured on specimen (scan)	Calculated from ratio against CBL Measured on photograph of another specimen	Ekdale EG (2013) Comparative Anatomy of the Bony Labyrinth (Inner Ear) of Placental Mammals. PLoS ONE 8(6): e66624.	Bradley, S. & Hudson, J. 1974. Temperature Regulation in the Tree Shrew Tupaia glis. Comparative Biochemistry and Physiology, 48:55-60. Taken as the averge of Tupaia glis.	.
Cynocephalus	volans	AMNH187859	Mammalia	Euarchontoglires	2.216	2.101	1.865	1.795	1.844	1.638	0.277	0.329	0.262	2.1585	1.83	1.741	0.317958	0.271401	0.45929	9.511	8.284	8.469	0.1385	0.1645	0.131	66	40.1	1000	-	Endotherm	1.19		J. Janečka, K. Helgen, N. Lim, M. Baba, M. Izawa, Boeadi, W. Murphy. Evidence for multiple species of Sunda colugo. Current Biology 18(21), R1001-R1002	Calculated from ratio against CBL Measured on photograph of another specimen	Ekdale EG (2013) Comparative Anatomy of the Bony Labyrinth (Inner Ear) of Placental Mammals. PLoS ONE 8(6): e66624.	-	.
Nycticebus	coucang	CEB-130090	Mammalia	Euarchontoglires	1.97	1.96	1.93	1.55	1.98	1.36	0.34	0.33	0.36	1.965	1.74	1.67	0.100631	0.595832	0.726782	8	7.2	7.7	0.17	0.165	0.18	57.4	47.9	856	35.4	Endotherm	1.19		Measured on specimen	Calculated from ratio against CBL Measured on photograph of another specimen	Spoor, F., Garland, T., Krovitz, G., Ryan, T.M., Silcox, M.T. and Walker, A., 2007. The primate semicircular canal system and locomotion. Proceedings of the National Academy of Sciences, 104(26), pp.10808-10812.	Muller, E. 1979. Energy Metabolism Thermoregulation and Water Budget in the Slow Loris (Nycticebus coucang, Boddaert 1785). Comparative Biochemistry and Physiology, 64:109-119.	.
Euoticus	elegantulus	CEB-140055	Mammalia	Euarchontoglires	1.95	1.84	2.04	1.66	2.24	1.5	0.24	0.24	0.24	1.895	1.85	1.87	0.331117	0.581249	0.742683	8.1	8.4	9.1	0.12	0.12	0.12	42.5	31.3	289	37.85	Endotherm	1.19		Measured on specimen	Calculated from ratio against CBL Measured on photograph of another specimen	Taken as average from https://eol.org/terms/search_results?tq%5Bc%5D=324408&tq%5Bf%5D%5B0%5D%5Bp%5D=260&tq%5Bf%5D%5B0%5D%5Bps%5D%5B%5D%5Bt%5D=predicate&tq%5Bf%5D%5B0%5D%5Bps%5D%5B%5D%5Bp%5D=260&tq%5Bf%5D%5B0%5D%5Brp%5D=260&tq%5Bf%5D%5B0%5D%5Bu%5D=924&tq%5Br%5D=record	Knox, C. & Wright, P. 1989. Thermoregulation and energy metabolism in the lesser bushbaby, Galago senegalensis moholi. South African Journal of Zoology, 24:89-94. Taken as equal to that of Galago senegalensis.	.
Microcebus	sp.	CEB-140043	Mammalia	Euarchontoglires	1.47	1.16	1.3	1.07	1.35	1.09	0.2	0.23	0.22	1.315	1.185	1.22	0.614245	0.56793	0.589994	5.2	5.4	5.7	0.1	0.115	0.11	31.9	25.8	43	35.9	Endotherm	1.19		Measured on specimen	Calculated from ratio against CBL Measured on photograph of another specimen	Spoor, F., Garland, T., Krovitz, G., Ryan, T.M., Silcox, M.T. and Walker, A., 2007. The primate semicircular canal system and locomotion. Proceedings of the National Academy of Sciences, 104(26), pp.10808-10812.	Seguy, M. & Perret, M. 2005. Factors affecting the daily rhythm of body temperature of captive mouse lemurs (Microcebus murinus). Journal of Comparative Physiology B, 175:107-115.	.
Lemur	catta	CEB-130135	Mammalia	Euarchontoglires	2.42	2.2	2.4	1.84	2.07	1.89	0.27	0.3	0.32	2.31	2.12	1.98	0.416598	0.642045	0.407862	9.2	8.8	9.3	0.135	0.15	0.16	76.9	55.5	2210	38	Endotherm	1.19		Measured on specimen	Calculated from ratio against CBL Measured on photograph of another specimen	Spoor, F., Garland, T., Krovitz, G., Ryan, T.M., Silcox, M.T. and Walker, A., 2007. The primate semicircular canal system and locomotion. Proceedings of the National Academy of Sciences, 104(26), pp.10808-10812.	Williams, C., Glenn, K., Levine, J. & Horne, W. 2003. Comparison of the Efficacy and Cardiorespiratory Effects of Medetomidine-bades Anesthetic Protocols in Ring-tailed Lemurs (Lemur catta). Journal of Zoo and Wildlife Medicine, 34:164-170.	.
Saimiri	sciureus	CEB-130037	Mammalia	Euarchontoglires	2.381	2.336	2.251	1.7135	2.1445	1.9755	0.4	0.4	0.428	2.3585	1.98225	2.06	0.193499	0.648497	0.389104	8.709	8.504	9.774	0.2	0.2	0.214	45	39.9	759	38.4	Endotherm	1.19		Measured on specimen	Calculated from ratio against CBL Measured on photograph of another specimen	Spoor, F., Garland, T., Krovitz, G., Ryan, T.M., Silcox, M.T. and Walker, A., 2007. The primate semicircular canal system and locomotion. Proceedings of the National Academy of Sciences, 104(26), pp.10808-10812.	Robinson, E., Demaria-Pesce, V. & Fuller, C. 1993. Circadian rhythms of thermoregulation in the Squirrel Monkey (Saimiri sciureus). American Journal of Physiology, 265:781-785.	.
Callithrix	jacchus	CEB-130123	Mammalia	Euarchontoglires	1.9255	1.5175	2.0575	1.476	1.869	1.564	0.476	0.422	0.485	1.7215	1.76675	1.7165	0.615538	0.696687	0.547492	5.949	7.788	7.735	0.238	0.211	0.2425	46.3	40.5	324	37.5	Endotherm	1.19		Measured on specimen	Calculated from ratio against CBL Measured on photograph of another specimen	Spoor, F., Garland, T., Krovitz, G., Ryan, T.M., Silcox, M.T. and Walker, A., 2007. The primate semicircular canal system and locomotion. Proceedings of the National Academy of Sciences, 104(26), pp.10808-10812.	Hetherington, C. 1978. Circadian oscillations of body temperature in the marmoset, Callithrix jacchus. Laboratory Animals, 12:107-108.	.
Papio	hamadryas	CEB-140064	Mammalia	Euarchontoglires	3.45	3.41	2.93	2.85	3.24	3.2	0.54	0.46	0.53	3.43	2.89	3.22	0.151835	0.232082	0.156649	13.3	13.7	15.6	0.27	0.23	0.265	177.8	93.6	16730	38.1	Endotherm	1.19		Measured on specimen	Calculated from ratio against CBL Measured on photograph of another specimen	Lukas, D. and Clutton-Brock, T. 2014. Costs of mating competition limit male lifetime breeding success in polygynous mammals. Proceedings of the Royal Society B, 281 20140418 doi:10.1098/rspb.2014.0418	Brain, C. & Mitchell, D. 1999. Body Temperature Changes in Free-ranging Baboons (Papio hamadryas ursinus) in the Namib Desert, Namibia. International Journal of Primatology, 20:585-598.	.
Macaca	mulatta	CEB-130105	Mammalia	Euarchontoglires	2.9185	2.605	3.0605	2.6695	2.819	2.692	0.3766	0.452	0.399	2.76175	2.865	2.7555	0.450885	0.489073	0.296771	11.498	12.973	13.561	0.1883	0.226	0.1995	93.4	69.3	9286	37.4	Endotherm	1.19		Measured on DKY_2677	Calculated from ratio against CBL Measured on photograph of another specimen	Spoor, F., Garland, T., Krovitz, G., Ryan, T.M., Silcox, M.T. and Walker, A., 2007. The primate semicircular canal system and locomotion. Proceedings of the National Academy of Sciences, 104(26), pp.10808-10812.	Myers, R., Veale, W. & Yaksh, T. 1971. Changes in Body Temperature of the Unanaesthetized Monkey Produced by Sodium and Calcium Ions Perfused Through The Cerebral Ventricles. Journal of Physiology, 217:381-392.	.
Macaca	fascicularis	CEB-130104	Mammalia	Euarchontoglires	2.97	2.87	2.89	2.46	2.56	2.44	0.44	0.45	0.46	2.92	2.675	2.5	0.257306	0.524824	0.302577	11.8	12.2	11.7	0.22	0.225	0.23	117	78.7	4475	37.6	Endotherm	1.19		Measured on specimen	Calculated from ratio against CBL Measured on photograph of another specimen	Spoor, F., Garland, T., Krovitz, G., Ryan, T.M., Silcox, M.T. and Walker, A., 2007. The primate semicircular canal system and locomotion. Proceedings of the National Academy of Sciences, 104(26), pp.10808-10812.	Sikoski, P., Banks, M., Gould, R., Young, R., Wallace, J. & Nader, M. 2007. Comparison of rectal and infrared thermometry for obtaining body temperature in cynomologus macaques (Macaca fascicularis). Journal of Medical Primatology, 36:381-384.	.
Hylobates	lar	CEB-130066	Mammalia	Euarchontoglires	3.4085	2.4615	3.137	2.597	2.9895	2.753	0.452	0.48	0.51	2.935	2.867	2.87125	0.691721	0.560933	0.389823	12.201	12.679	13.276	0.226	0.24	0.255	82.7	65.6	5620	37.47	Endotherm	1.19		Measured on specimen	Calculated from ratio against CBL Measured on photograph of another specimen	Spoor, F., Garland, T., Krovitz, G., Ryan, T.M., Silcox, M.T. and Walker, A., 2007. The primate semicircular canal system and locomotion. Proceedings of the National Academy of Sciences, 104(26), pp.10808-10812.	Carpenter, C. 1941. The Menstrual Cycle and Body Temperature in Two Gibbons (Hylobates lar). The Anatomical Record, 79:291-296.	.
Pongo	abelii	CEB-140065	Mammalia	Euarchontoglires	4.06	3.51	3.79	3.36	3.43	3.22	0.71	0.82	0.95	3.785	3.575	3.325	0.502578	0.462645	0.344529	17.2	17.2	16.2	0.355	0.41	0.475	189.4	111.7	77900	36.35	Endotherm	1.19		Measured on specimen	Calculated from ratio against CBL Measured on photograph of another specimen	Isler, K., & Thorpe, S. K. (2003). Gait parameters in vertical climbing of captive, rehabilitant and wild Sumatran orang-utans (Pongo pygmaeus abelii). Journal of Experimental Biology, 206(22), 4081-4096.	Dharmalingam, S. 2015. Temperature Management in Infant Orangutan (Pongo pygmaeus) at Orang Utan Island, Bukit Merah, Perak, Malaysia. Merit Research Journal of Medicine and Medical Sciences, 3:497-501. Taken as equal to that of Pongo pygmaeus juvenile.	.
Homo	sapiens	CEB-130017	Mammalia	Euarchontoglires	4.0585	3.772	4.2895	3.8085	3.7995	3.601	0.722	0.812	0.745	3.91525	4.049	3.70025	0.369055	0.460103	0.318995	15.425	18.512	15.8	0.361	0.406	0.3725	110	101.2	58313	37	Endotherm	1.19		Measured on specimen	Calculated from ratio against CBL Measured on photograph of another specimen	Spoor, F., Garland, T., Krovitz, G., Ryan, T.M., Silcox, M.T. and Walker, A., 2007. The primate semicircular canal system and locomotion. Proceedings of the National Academy of Sciences, 104(26), pp.10808-10812.	Sund-Levander, M., Forsberg, C. & Wahren, L. 2002. Normal oral, rectal, tympanic and axillary body temperature in adult men and women: a systematic literature review. Scandinavian Journal of Caring Sciences, 16:122-128.	.
Pan	paniscus	CEB-150021	Mammalia	Euarchontoglires	3.34	2.6105	3.1415	3.021	3.1945	3.07	0.691	0.676	0.749	2.97525	3.08125	3.13225	0.623796	0.274306	0.276455	11.195	12.196	13.701	0.3455	0.338	0.3745	112.1	82.2	39100	37.2	Endotherm	1.19		Measured on specimen	Calculated from ratio against CBL Measured on photograph of another specimen	Spoor, F., Garland, T., Krovitz, G., Ryan, T.M., Silcox, M.T. and Walker, A., 2007. The primate semicircular canal system and locomotion. Proceedings of the National Academy of Sciences, 104(26), pp.10808-10812.	Jensen, S., Mundry, R., Nunn, C., Boesch, C. & Leendertz, F. 2009. Non-invasive Body Temperature Measurement of Wild Chimpanzees Using Fecal Temperature Decline. Journal of Wildlife Diseases, 45:542-546.	.
Sorex	monticolus	unvouchered	Mammalia	Laurasiatheria	0.917	0.5035	0.852	0.513	0.576	0.54	0.122	0.12	0.156	0.71025	0.6825	0.558	0.835774	0.798411	0.347985	2.361	2.757	2.297	0.061	0.06	0.078	16.9	11.5	6.1	38.8	Endotherm	1.19		Measured on specimen (scan)	Calculated from ratio against CBL Measured on photograph of another specimen	Ekdale EG (2013) Comparative Anatomy of the Bony Labyrinth (Inner Ear) of Placental Mammals. PLoS ONE 8(6): e66624.	McNab, B. 1970. Body Weight and the Energetics of Temperature Regulation. Journal of Experimental Biology, 53:329-348. Temperature from Sorex cinereus	.
Atelerix	albiventris	unvouchered	Mammalia	Laurasiatheria	1.4965	1.276	1.323	1.217	1.975	1.1885	0.165	0.177	0.161	1.38625	1.27	1.58175	0.522472	0.392202	0.798668	4.792	5.336	4.944	0.0825	0.0885	0.0805	38.1	26.6	866	35.2	Endotherm	1.19		Measured on specimen (scan)	Calculated from ratio against CBL Measured on photograph of another specimen	Ekdale EG (2013) Comparative Anatomy of the Bony Labyrinth (Inner Ear) of Placental Mammals. PLoS ONE 8(6): e66624.	Clarke A.& Johnston N. M.. 1999 Scaling of metabolic rate with body mass and temperature in teleost fish. J. Anim. Ecol. 68, 893–905.	.
Nycteris	grandis	AMNH 268369	Mammalia	Laurasiatheria	1.06	1.01	0.92	0.79	1.09	0.8	0.14	0.11	0.16	1.035	0.855	0.945	0.303504	0.512486	0.679209	3.8	4	4.3	0.07	0.055	0.08	27.8	20.2	29.3	-	Endotherm	1.19		Measured on specimen (scan)	Calculated from ratio against CBL Measured on photograph of another specimen	Ekdale EG (2013) Comparative Anatomy of the Bony Labyrinth (Inner Ear) of Placental Mammals. PLoS ONE 8(6): e66624.	-	.
Tadarida	brasiliensis	TMM-M-3030	Mammalia	Laurasiatheria	0.95	0.86	0.86	0.7	1.07	0.73	0.14	0.14	0.16	0.905	0.78	0.9	0.424851	0.58093	0.731126	2.9	2.9	3.8	0.07	0.07	0.08	16	12.6	12.1	36	Endotherm	1.19		Measured on specimen (scan)	Calculated from ratio against CBL Measured on photograph of another specimen	Ekdale EG (2013) Comparative Anatomy of the Bony Labyrinth (Inner Ear) of Placental Mammals. PLoS ONE 8(6): e66624.	Clarke A.& Johnston N. M.. 1999Scaling of metabolic rate with body mass and temperature in teleost fish. J. Anim. Ecol. 68, 893–905.	.
Carollia	perspicillata	CEB-130059	Mammalia	Laurasiatheria	0.98	0.95	0.95	0.8	0.95	0.72	0.16	0.151	0.162	0.965	0.875	0.835	0.245535	0.539313	0.652377	3.4	3.6	3.5	0.08	0.0755	0.081	18.9	13.8	15	36.4	Endotherm	1.19		Measured on specimen	Calculated from ratio against CBL Measured on photograph of another specimen	McNab, B. K. (1969). The economics of temperature regulation in neutropical bats. Comparative biochemistry and physiology, 31(2), 227-268.	McNab, B. 1969. The Economics of Temperature Regulation in Neotropical Bats. Comparative Biochemistry and Physiology, 31:227-268.	.
Rhinolophus	ferrumequinum	AMNH245591	Mammalia	Laurasiatheria	0.89	0.79	0.79	0.78	1.02	0.78	0.1	0.1	0.1	0.84	0.785	0.9	0.460537	0.158607	0.644379	3	3.5	3.5	0.05	0.05	0.05	24.3	17.1	17.2	35.6	Endotherm	1.19		Measured on specimen (scan)	Calculated from ratio against CBL Measured on photograph of another specimen	Ekdale EG (2013) Comparative Anatomy of the Bony Labyrinth (Inner Ear) of Placental Mammals. PLoS ONE 8(6): e66624.	Chen J, Sun M, Liang B, Xu A, Zhang S, Wu D (2007) Cloning and expression of PDK4, FOXO1A and DYRK1A from the hibernating greater horseshoe bat (Rhinolophus ferrumequinum). Comp Biochem Physiol B Biochem Mol Biol 146:166–171	.
Pteropus	lylei	AMNH237593	Mammalia	Laurasiatheria	1.5975	1.5105	1.594	1.2365	1.4645	1.3285	0.141	0.139	0.158	1.554	1.41525	1.3965	0.325506	0.631075	0.420839	5.993	6.176	6.457	0.0705	0.0695	0.079	65.2	45.6	435	-	Endotherm	1.19		Measured on specimen (scan)	Calculated from ratio against CBL Measured on photograph of another specimen	Measured on specimen	-	.
Pteropus	rodricensis	CEB-130097	Mammalia	Laurasiatheria	1.53	1.39	1.36	1.2	1.32	1.25	0.192	0.219	0.281	1.46	1.28	1.285	0.417892	0.470588	0.321323	6	5.8	6.6	0.096	0.1095	0.1405	51	35.2	254	36.5	Endotherm	1.19		Measured on CM 82972	Calculated from ratio against CBL Measured on photograph of another specimen	McNab, B. K., & Bonaccorso, F. J. (2001). The metabolism of New Guinean pteropodid bats. Journal of Comparative Physiology B, 171(3), 201-214.	McNab, B. 2001. The Metabolism of New Guinean Pteropodid Bats. Journal of Comparative Physiology B, 171:201-214.	.
Manis	tricuspis	AMNH53896	Mammalia	Laurasiatheria	1.867	1.6175	2.1195	1.649	1.473	1.413	0.393	0.393	0.486	1.74225	1.88425	1.443	0.499415	0.628247	0.282502	7.421	8.291	5.934	0.1965	0.1965	0.243	75.1	44.6	4500	32.6	Endotherm	1.19		Measured on specimen (scan)	Calculated from ratio against CBL Measured on photograph of another specimen	Ekdale EG (2013) Comparative Anatomy of the Bony Labyrinth (Inner Ear) of Placental Mammals. PLoS ONE 8(6): e66624.	Clarke A.& Johnston N. M.. 1999Scaling of metabolic rate with body mass and temperature in teleost fish. J. Anim. Ecol. 68, 893–905.	.
Cynictis	penicillata	CEB-130049	Mammalia	Laurasiatheria	2.3185	2.0225	2.379	1.9305	2.1885	1.833	0.312	0.326	0.326	2.1705	2.15475	2.01075	0.488915	0.584387	0.546345	7.624	9.438	10.248	0.156	0.163	0.163	47.3	35.5	860	38.3	Endotherm	1.19		Measured on specimen	Calculated from ratio against CBL Measured on photograph of another specimen	Cavallini, P. and Nel, J.A.J., 1995. Comparative behaviour and ecology of two sympatric mongoose species (Cynictis penicillata and Galerella pulverulenta). South African Journal of Zoology, 30(2), pp.46-49.	White, C. & Seymour, R. 2003. Mammalian basal metabolic rate is proportional to body mass2/3. PNAS, 100:4046-4049.	.
Felis	catus	CEB-130151	Mammalia	Laurasiatheria	2.1125	1.7755	1.908	1.9005	1.7915	1.762	0.29	0.28	0.29	1.944	1.90425	1.77675	0.541853	0.0885787	0.180727	6.858	8.223	7.159	0.145	0.14	0.145	89	71.5	3601	38.65	Endotherm	1.19		Measured on TMM-M-628	Calculated from ratio against CBL Measured on photograph of another specimen	Spoor, F., Garland, T., Krovitz, G., Ryan, T.M., Silcox, M.T. and Walker, A., 2007. The primate semicircular canal system and locomotion. Proceedings of the National Academy of Sciences, 104(26), pp.10808-10812.	Hilmer, S., Algar, D., Neck, D. & Schleucher, E. 2010. Remote sensing of physiological data: Impact of long term captivity on body temperature variation of the feral cat (Felis catus) in Australia, recorded via Thermochron iButtons. Journal of Thermal Biology, 35:205-210.	.
Canis	lupus familiaris	CEB-130128	Mammalia	Laurasiatheria	3.962	3.3915	3.5025	3.0605	3.757	2.918	0.44	0.3872	0.4288	3.67675	3.2815	3.3375	0.516964	0.486278	0.629891	14.955	14.575	15.779	0.22	0.1936	0.2144	266	100.4	62800	37.8	Endotherm	1.19		Measured on specimen	Calculated from ratio against CBL Measured on photograph of another specimen	Speakman, J. R., Van Acker, A., Harper, E. J. Age-related changes in the metabolism and body composition of three dog breeds and their relationship to life expectancy. Aging cell 2, 265-275 (2003).	McNab, B. 1970. Body Weight and the Energetics of Temperature Regulation. Journal of Experimental Biology, 53:329-348.	.
Nasua	nasua	CEB-130033	Mammalia	Laurasiatheria	2.08	1.88	1.77	1.67	1.71	1.67	0.33	0.3	0.32	1.98	1.72	1.69	0.427858	0.331364	0.215027	7.6	7.2	8.1	0.165	0.15	0.16	115	68	3698	36.4	Endotherm	1.19		Measured on specimen	Calculated from ratio against CBL Measured on photograph of another specimen	Taken as average from https://eol.org/terms/search_results?tq%5Bc%5D=328601&tq%5Bf%5D%5B0%5D%5Bp%5D=260&tq%5Bf%5D%5B0%5D%5Bps%5D%5B%5D%5Bt%5D=predicate&tq%5Bf%5D%5B0%5D%5Bps%5D%5B%5D%5Bp%5D=260&tq%5Bf%5D%5B0%5D%5Brp%5D=260&tq%5Bf%5D%5B0%5D%5Bu%5D=924&tq%5Br%5D=record	McNab, B. 1995. Energy Expenditure and Conservation in Frugivorous and Mixed-Diet Carnivorans. Journal of Mammalogy, 76:206-222.	.
Eumetopias	jubatus	TMM M-171	Mammalia	Laurasiatheria	3.5	2.76	3.14	2.61	3.31	2.93	0.38	0.41	0.48	3.13	2.875	3.12	0.614943	0.555958	0.465218	10.7	11.8	16.2	0.19	0.205	0.24	332	241.3	735000	36.4	Endotherm	1.19		Brunner, S., 2002. Geographic variation in skull morphology of adult Steller sea lions (Eumetopias jubatus). Marine Mammal Science, 18(1), pp.206-222.	Calculated from ratio against CBL Measured on photograph of another specimen	Ekdale EG (2013) Comparative Anatomy of the Bony Labyrinth (Inner Ear) of Placental Mammals. PLoS ONE 8(6): e66624.	Loughlin, T. R. & Spraker, T. (1989). Use of Telazol to immobi-lize female northern sea lions (Eumetopias jubatus) in Alaska.J. Wildl. Dis. 25: 353-358.	.
Phoca	sp.	UM PV 251212	Mammalia	Laurasiatheria	5.7	4.1	4.76	3.16	4.35	3.31	0.91	0.92	0.89	4.9	3.96	3.83	0.694701	0.747852	0.648846	17.7	15.1	16.8	0.455	0.46	0.445	215	164.2	104000	37.8	Endotherm	1.19		Measured on specimen	Calculated from ratio against CBL Measured on photograph of another specimen	Smith, F.A., Lyons, S.K., Ernest, S.K.M., Jones, K.E., Kaufman, D.M., Dayan, T., Marquet, P.A., Brown, J.H. and Haskell, J.P. (2003), BODY MASS OF LATE QUATERNARY MAMMALS. Ecology, 84: 3403-3403.	Miller, K. and Irving, L. (1975). Metabolism and temperature regulation in young harbor seals Phoca vitulina richardi. Am. J. Physiol. 229, 506-511.	.
Equus	ferus caballus	CEB-130056	Mammalia	Laurasiatheria	5.1665	4.138	4.571	4.0295	4.939	3.453	0.455	0.44	0.454	4.65225	4.30025	4.196	0.598759	0.472117	0.714995	17.679	19.107	19.452	0.2275	0.22	0.227	525	235.2	250000	38.3	Endotherm	1.19		Measured on TMM-M-171	Calculated from ratio against CBL Measured on photograph of another specimen	Ekdale EG (2013) Comparative Anatomy of the Bony Labyrinth (Inner Ear) of Placental Mammals. PLoS ONE 8(6): e66624.	Piccione, G., Caola, G. & Refinetti, R. 2002. The Circadian Rhythm of Body Temperature of the Horse. Biological Rhythm Research, 33:113-119.	.
Rhinoceros	sondaicus	UM N 785V	Mammalia	Laurasiatheria	4.44	4.3	4.14	3.73	3.37	2.9	0.53	0.61	0.68	4.37	3.935	3.135	0.249136	0.433889	0.509393	14.6	17.2	11.8	0.265	0.305	0.34	640	317.3	1750000	-	Endotherm	1.19		Measured on specimen	Calculated from ratio against CBL Measured on photograph of another specimen	Kate E. Jones, Jon Bielby, Marcel Cardillo, Susanne A. Fritz, Justin O'Dell, C. David L. Orme, Kamran Safi, Wes Sechrest, Elizabeth H. Boakes, Chris Carbone, Christina Connolly, Michael J. Cutts, Janine K. Foster, Richard Grenyer, Michael Habib, Christopher A. Plaster, Samantha A. Price, Elizabeth A. Rigby, Janna Rist, Amber Teacher, Olaf R. P. Bininda-Emonds, John L. Gittleman, Georgina M. Mace,…	-	.
Tapirus	terrestris	UM N-671	Mammalia	Laurasiatheria	3.45	3.38	3.78	3.12	3.44	3.28	0.4	0.4	0.54	3.415	3.45	3.36	0.20042	0.564553	0.30143	12	14.1	14.1	0.2	0.2	0.27	360	212.4	169496	37	Endotherm	1.19		Measured on specimen	Calculated from ratio against CBL Measured on photograph of another specimen	Kate E. Jones, Jon Bielby, Marcel Cardillo, Susanne A. Fritz, Justin O'Dell, C. David L. Orme, Kamran Safi, Wes Sechrest, Elizabeth H. Boakes, Chris Carbone, Christina Connolly, Michael J. Cutts, Janine K. Foster, Richard Grenyer, Michael Habib, Christopher A. Plaster, Samantha A. Price, Elizabeth A. Rigby, Janna Rist, Amber Teacher, Olaf R. P. Bininda-Emonds, John L. Gittleman, Georgina M. Mace,…	Medici EP, Mangini PR, Fernandes-Santos RC (2014) Health assessment of wild lowland tapir (Tapirus terrestris) populations in the Atlantic Forest and Pantanal biomes, Brazil (1996-2012). J Wildl Dis 50(4): 817–28	.
Lama	guanicoe	UM N- 228	Mammalia	Laurasiatheria	4.29	3.54	3.99	3.11	3.53	3.23	0.45	0.42	0.41	3.915	3.55	3.38	0.564877	0.626466	0.403422	14	14	14.4	0.225	0.21	0.205	265	132.2	120000	38	Endotherm	1.19		Measured on specimen	Calculated from ratio against CBL Measured on photograph of another specimen	Smith, F.A., Lyons, S.K., Ernest, S.K.M., Jones, K.E., Kaufman, D.M., Dayan, T., Marquet, P.A., Brown, J.H. and Haskell, J.P. (2003), BODY MASS OF LATE QUATERNARY MAMMALS. Ecology, 84: 3403-3403.	de Lamo DA, Lacolla D, Heath JE. 2001. Sweating in the guanaco (Lama guanicoe). Journal of Thermal Biology 26, 77– 83.	.
Vicugna	pacos	CEB-130038	Mammalia	Laurasiatheria	3.4205	2.9685	3.7695	2.5185	3.301	2.503	0.41	0.4	0.4	3.1945	3.144	2.902	0.496817	0.744048	0.651958	12.66	14.153	13.671	0.205	0.2	0.2	238	120.3	54325	37.7	Endotherm	1.19		Measured on Digimorph specimen	Calculated from ratio against CBL Measured on photograph of another specimen	Dittmann, M.T., Runge, U., Lang, R.A., Moser, D., Galeffi, C., Kreuzer, M. and Clauss, M., 2014. Methane emission by camelids. PLoS One, 9(4), p.e94363.	Moore, K., Maloney, S., Vaughan, J., Milton, J. & Blache, D. 2013. Rumen-protected methionine supplementation and fibre production in alpacas (Vicugna pacos). Journal of Animal Physiology and Animal Nutrition, 97:1084-1090.	.
Doliochoerus	quercyi	MNHN Qu1	Mammalia	Laurasiatheria	3.22	3.01	2.9	2.29	2.55	2.07	0.52	0.54	0.44	3.115	2.595	2.31	0.35522	0.613551	0.583985	12	9.8	9.3	0.26	0.27	0.22	140	64.6	10067.3	-	Unknown	1.19		Measured on specimen	Calculated from ratio against CBL Measured on a reconstruction of the skull	Predicted from CBL and CAOL using an allometric regression computed in this study	-	.
Tayassu	pecari	UM N 03	Mammalia	Laurasiatheria	2.54	2.11	2.7	2.15	2.05	1.99	0.34	0.33	0.39	2.325	2.425	2.02	0.556707	0.604907	0.240167	8.9	9.7	8.9	0.17	0.165	0.195	190	81	31798	38.5	Endotherm	1.19		Measured on specimen	Calculated from ratio against CBL Measured on photograph of another specimen	Kate E. Jones, Jon Bielby, Marcel Cardillo, Susanne A. Fritz, Justin O'Dell, C. David L. Orme, Kamran Safi, Wes Sechrest, Elizabeth H. Boakes, Chris Carbone, Christina Connolly, Michael J. Cutts, Janine K. Foster, Richard Grenyer, Michael Habib, Christopher A. Plaster, Samantha A. Price, Elizabeth A. Rigby, Janna Rist, Amber Teacher, Olaf R. P. Bininda-Emonds, John L. Gittleman, Georgina M. Mace,…	Phelps, J., 1971. Behavioral thermoregulation in the javelina (Tayassu tajacu). M. S. thesis, Univ. of Arizona. Based on Tayassu tajacu	.
Babyrousa	babyrussa	AMNH M 2238	Mammalia	Laurasiatheria	3.16	2.97	2.99	2.4	2.51	2.14	0.42	0.39	0.45	3.065	2.695	2.325	0.341523	0.596416	0.522581	9.9	10	8.3	0.21	0.195	0.225	265	113	100000	37.65	Endotherm	1.19		Measured on specimen	Calculated from ratio against CBL Measured on photograph of another specimen	Smith, F.A., Lyons, S.K., Ernest, S.K.M., Jones, K.E., Kaufman, D.M., Dayan, T., Marquet, P.A., Brown, J.H. and Haskell, J.P. (2003), BODY MASS OF LATE QUATERNARY MAMMALS. Ecology, 84: 3403-3403.	Alexander, Amy B., Hanley, Christopher S., Fischer, Martha T., and Padilla, Luis R. management of Toxic Mastitis in a Babirusa (Babyrousa celebensis) Journal of Zoo and Wildlife Medicine, 46(4) : 949-952 Based on Babyrousa celebensis	.
Sus	scrofa domesticus	CEB-130005	Mammalia	Laurasiatheria	3.1915	2.7745	3.2095	2.333	2.8215	2.6005	0.4494	0.41	0.4178	3.67675	3.2815	3.3375	0.516964	0.486278	0.629891	11.738	11.821	11.642	0.2247	0.205	0.2089	310	110.4	55000	38.4	Endotherm	1.19		Measured on TMM-M2689	Calculated from ratio against CBL Measured on photograph of another specimen	Spoor, F., Garland, T., Krovitz, G., Ryan, T.M., Silcox, M.T. and Walker, A., 2007. The primate semicircular canal system and locomotion. Proceedings of the National Academy of Sciences, 104(26), pp.10808-10812.	McNab, B. 1970. Body Weight and the Energetics of Temperature Regulation. Journal of Experimental Biology, 53:329-348.	.
Hylochoerus	meinertzhageni	AMNH M 53672	Mammalia	Laurasiatheria	3.49	3.11	3.33	2.75	2.96	2.82	0.4	0.41	0.43	3.3	3.04	2.89	0.453773	0.563925	0.303904	11.1	12	11.1	0.2	0.205	0.215	371.5	99.1	198130	-	Endotherm	1.19		Measured on specimen	Calculated from ratio against CBL Measured on photograph of another specimen	Kate E. Jones, Jon Bielby, Marcel Cardillo, Susanne A. Fritz, Justin O'Dell, C. David L. Orme, Kamran Safi, Wes Sechrest, Elizabeth H. Boakes, Chris Carbone, Christina Connolly, Michael J. Cutts, Janine K. Foster, Richard Grenyer, Michael Habib, Christopher A. Plaster, Samantha A. Price, Elizabeth A. Rigby, Janna Rist, Amber Teacher, Olaf R. P. Bininda-Emonds, John L. Gittleman, Georgina M. Mace,…	-	.
Potamochoerus	porcus	AMNH MO-294	Mammalia	Laurasiatheria	2.89	2.405	2.945	2.165	2.48	2.115	0.37	0.37	0.37	2.6475	2.555	2.2975	0.554506	0.677911	0.522201	9.33	10.12	10.11	0.185	0.185	0.185	387	122.1	69063	38.3	Endotherm	1.19		Measured on specimen	Calculated from ratio against CBL Measured on photograph of another specimen	Smith, F.A., Lyons, S.K., Ernest, S.K.M., Jones, K.E., Kaufman, D.M., Dayan, T., Marquet, P.A., Brown, J.H. and Haskell, J.P. (2003), BODY MASS OF LATE QUATERNARY MAMMALS. Ecology, 84: 3403-3403.	Lyle K. Sowls and Robert J. Phelps Body Temperatures of Juvenile Warthogs and Bushpigs Journal of Mammalogy Vol. 47, No. 1 (Feb., 1966), pp. 134-137 Based on Phacochoerus aethipicus	.
Phacochoerus	aethiopicus	AMNH MO-159	Mammalia	Laurasiatheria	2.93	2.4	2.995	2.04	2.395	2.385	0.35	0.29	0.31	2.665	2.5175	2.39	0.573633	0.732158	0.0912869	9.02	10.42	9.79	0.175	0.145	0.155	360	79.5	71000	38.3	Endotherm	1.19		Measured on specimen	Calculated from ratio against CBL Measured on photograph of another specimen	Smith, F.A., Lyons, S.K., Ernest, S.K.M., Jones, K.E., Kaufman, D.M., Dayan, T., Marquet, P.A., Brown, J.H. and Haskell, J.P. (2003), BODY MASS OF LATE QUATERNARY MAMMALS. Ecology, 84: 3403-3403.	Lyle K. Sowls and Robert J. Phelps Body Temperatures of Juvenile Warthogs and Bushpigs Journal of Mammalogy Vol. 47, No. 1 (Feb., 1966), pp. 134-137	.
Tursiops	truncatus	SDNHM21212	Mammalia	Laurasiatheria	1.371	1.208	1.162	0.9815	1.6695	1.544	0.274	0.273	0.238	1.2895	1.07175	1.60675	0.472914	0.535296	0.380386	3.64	3.602	6.667	0.137	0.1365	0.119	543	292.9	179500	36.3	Endotherm	1.19		Measured on specimen (scan)	Calculated from ratio against CBL Measured on photograph of another specimen	Ekdale EG (2013) Comparative Anatomy of the Bony Labyrinth (Inner Ear) of Placental Mammals. PLoS ONE 8(6): e66624.	Mackay, R. S. 1964. Deep body temperature of untethered dolphin recorded by ingested radio transmitter. Science 144:864–866.	.
Hippopotamus	amphibius	AMNH M 24289	Mammalia	Laurasiatheria	6.12	5.26	5.88	4.86	5.44	4.62	0.56	0.62	0.62	5.69	5.37	5.03	0.511174	0.562892	0.527967	18.4	18.42	20.52	0.28	0.31	0.31	625	268.2	1140500	35.4	Endotherm	1.19		Measured on specimen	Calculated from ratio against CBL Measured on photograph of another specimen	S. K. Morgan Ernest. 2003. Life history characteristics of placental non-volant mammals. Ecology 84:3402.	Noirard C. Le Berre M. Ramousse R. Lena J.P.2008, Seasonal variation of thermoregulatory behaviour in the Hippopotamus (Hippopotamus amphibius): Journal of Ethology , v. 26, p. 191–193	.
Choeropsis	liberiensis	UCR 3116	Mammalia	Laurasiatheria	4.14	3.7	3.84	3.03	3.52	2.78	0.62	0.5	0.66	3.92	3.435	3.15	0.448626	0.614313	0.6134	12.6	11.5	12	0.31	0.25	0.33	298	162.6	235000	37.35	Endotherm	1.19		Measured on specimen	Calculated from ratio against CBL Measured on photograph of another specimen	Kate E. Jones, Jon Bielby, Marcel Cardillo, Susanne A. Fritz, Justin O'Dell, C. David L. Orme, Kamran Safi, Wes Sechrest, Elizabeth H. Boakes, Chris Carbone, Christina Connolly, Michael J. Cutts, Janine K. Foster, Richard Grenyer, Michael Habib, Christopher A. Plaster, Samantha A. Price, Elizabeth A. Rigby, Janna Rist, Amber Teacher, Olaf R. P. Bininda-Emonds, John L. Gittleman, Georgina M. Mace,…	Franz, W., H. Heymann, and D. Zscheile. 1978. Immobilisierung und Nabelbruchoperation beim Zwergflusspferd (Choeropsis liberiensis). Erkrankungen der Zootiere: Verhandlungsbericht 20:197–200.	.
Diplobune	minor	UM ITD 1080	Mammalia	Laurasiatheria	2.695	2.345	2.87	2.255	2.22	1.91	0.29	0.25	0.31	2.52	2.5625	2.065	0.492822	0.61859	0.509686	8.87	10.19	9.11	0.145	0.125	0.155	160	86.4	15031.5	-	Unknown	1.19		Orliac, M.J., Araújo, R. and Lihoreau, F., 2017. The petrosal and bony labyrinth of Diplobune minor, an enigmatic Artiodactyla from the Oligocene of Western Europe. Journal of Morphology, 278(9), pp.1168-1184.	Orliac, M.J., Araújo, R. and Lihoreau, F., 2017. The petrosal and bony labyrinth of Diplobune minor, an enigmatic Artiodactyla from the Oligocene of Western Europe. Journal of Morphology, 278(9), pp.1168-1184.	Predicted from CBL and CAOL using an allometric regression computed in this study	-	.
Bachitherium	sp.	UM PDS 3360	Mammalia	Laurasiatheria	2.39	2.36	2.32	2.05	2.14	1.91	0.35	0.31	0.34	2.375	2.185	2.025	0.157946	0.468203	0.451001	9.4	8.9	8.1	0.175	0.155	0.17	175	92.4	21391	-	Unknown	1.19		Measured on specimen	Calculated from ratio against CBL Measured on photograph of another specimen	Predicted from CBL and CAOL using an allometric regression computed in this study	-	.
Moschiola	meminna	UM 58V	Mammalia	Laurasiatheria	2.15	1.96	2.28	1.93	1.88	1.83	0.23	0.23	0.28	2.055	2.105	1.855	0.411016	0.532403	0.229094	8.8	9	8.3	0.115	0.115	0.14	77	45.3	3131	-	Endotherm	1.19		Measured on specimen	Calculated from ratio against CBL Measured on photograph of another specimen	Kate E. Jones, Jon Bielby, Marcel Cardillo, Susanne A. Fritz, Justin O'Dell, C. David L. Orme, Kamran Safi, Wes Sechrest, Elizabeth H. Boakes, Chris Carbone, Christina Connolly, Michael J. Cutts, Janine K. Foster, Richard Grenyer, Michael Habib, Christopher A. Plaster, Samantha A. Price, Elizabeth A. Rigby, Janna Rist, Amber Teacher, Olaf R. P. Bininda-Emonds, John L. Gittleman, Georgina M. Mace,…	-	.
Rangifer	tarandus	UPPal ART-12-020	Mammalia	Laurasiatheria	3.46	3.29	3.28	3.12	3.04	2.9	0.37	0.42	0.45	3.375	3.2	2.97	0.309599	0.308515	0.299974	12.7	13.6	11.7	0.185	0.21	0.225	345	142.6	86000	39.2	Endotherm	1.19		Measured on specimen	Calculated from ratio against CBL Measured on photograph of another specimen	S. K. Morgan Ernest. 2003. Life history characteristics of placental non-volant mammals. Ecology 84:3402.	Clarke A.& Johnston N. M.. 1999Scaling of metabolic rate with body mass and temperature in teleost fish. J. Anim. Ecol. 68, 893–905.	.
Giraffa	camelopardalis antiquorum	RMCA 83,001-M-0014	Mammalia	Laurasiatheria	4.77	3.9	3.77	3.54	3.57	2.91	0.44	0.46	0.42	4.335	3.655	3.24	0.575772	0.343939	0.579284	16.62	15.54	14.26	0.22	0.23	0.21	663	292.7	895929	38.425	Endotherm	1.19		Measured on specimen	Calculated from ratio against CBL Measured on photograph of another specimen	Smith, F.A., Lyons, S.K., Ernest, S.K.M., Jones, K.E., Kaufman, D.M., Dayan, T., Marquet, P.A., Brown, J.H. and Haskell, J.P. (2003), BODY MASS OF LATE QUATERNARY MAMMALS. Ecology, 84: 3403-3403.	Dagg AI: Giraffa camelopardalis . Mammal Species. 1971, 5: 1-8.	.
Bos	primigenius taurus	CEB-130029	Mammalia	Laurasiatheria	4.6485	3.5295	4.503	3.245	3.978	3.0905	0.46	0.51	0.5	4.089	3.874	3.53425	0.650767	0.693319	0.629627	15.517	17.362	15.547	0.23	0.255	0.25	436.5	232.3	290000	38.5	Endotherm	1.19		Measured on specimen	Calculated from ratio against CBL Measured on photograph of another specimen	Spoor, F., Garland, T., Krovitz, G., Ryan, T.M., Silcox, M.T. and Walker, A., 2007. The primate semicircular canal system and locomotion. Proceedings of the National Academy of Sciences, 104(26), pp.10808-10812.	Ingram, D. & Whittow, G. 1963. Changes of Arterial Blood Pressure and Heart Rate in the Ox (Bos Taurus) with changes of Body Temperature. Journal of Physiology, 168:736-746.	.
Maj_a_B	: Semi-major axis of the anterior bony semicircular canal
Min_a_B	: Semi-minor axis of the anterior bony semicircular canal
Maj_p_B	: Semi-major axis of the posterior bony semicircular canal
Min_p_B	: Semi-minor axis of the posterior bony semicircular canal
Maj_l_B	: Semi-major axis of the lateral bony semicircular canal
Min_l_B	: Semi-minor axis of the lateral bony semicircular canal
dS_a_B	: Average transverse diameter of the lumen of the slender part of the anterior bony semicircular canal
dS_p_B	: Average transverse diameter of the lumen of the slender part of the posterior bony semicircular canal
dS_l_B	: Average transverse diameter of the lumen of the slender part of the lateral bony semicircular canal
R_a_B	: Radius of curvature of the anterior bony semicircular canal
R_p_B	: Radius of curvature of the posterior bony semicircular canal
R_l_B	: Radius of curvature of the lateral bony semicircular canal
e_a_B	: Eccentricity of the anterior bony semicircular canal
e_p_B	: Eccentricity of the posterior bony semicircular canal
e_l_B	: Eccentricity of the lateral bony semicircular canal
LS_a_B	: External length of the slender part of the anterior bony semicircular canal
LS_p_B	: External length of the slender part of the posterior bony semicircular canal
LS_l_B	: External length of the slender part of the lateral bony semicircular canal
rS_a_B	: Average transverse radius of the lumen of the slender part of the anterior bony semicircular canal
rS_p_B	: Average transverse radius of the lumen of the slender part of the posterior bony semicircular canal
rS_l_B	: Average transverse radius of the lumen of the slender part of the lateral bony semicircular canal
CBL	: Condylobasal length
CAOL	: Condylo-anteroorbital length
BM	: Body mass
BT	: Body temperature
TR	: Thermic regime
VR	: Viscosity relative to water
NTS	: Non-therapsid synapid
NNT	: Non-neotherapsid therapsid
NPC	: Non-probainognathian cynodont
NMP	: Non-mammaliamorph probainognathian
NMM	: Non-mammalian mammaliamorph
Predicted missing measurements are shown in blue
Caclulated values based on predicted measurements are shown in green

## Sheet: 3D Membranous Sample
Genus	Species	Specimen	Major Clade	Maj_a_B (mm)	Min_a_B (mm)	Maj_p_B (mm)	Min_p_B (mm)	Maj_l_B (mm)	Min_l_B (mm)	dS_a_B (mm)	dS_p_B (mm)	dS_l_B (mm)	R_a_B (mm)	R_p_B (mm)	R_l_B (mm)	e_a_B	e_p_B	e_l_B	LS_a_B (mm)	LS_p_B (mm)	LS_l_B (mm)	rS_a_B (mm)	rS_p_B (mm)	rS_l_B (mm)	ASD_a (mm2)	ASD_p (mm2)	ASD_l (mm2)	LS_a (mm)	LS_p (mm)	LS_l (mm)	dS_a_Out (mm)	dS_p_Out (mm)	dS_l_Out (mm)	aS_a (mm2)	aS_p (mm2)	aS_l (mm2)	wS_a	wS_p	wS_l	tCa (mm)	tCp (mm)	tCl (mm)	hca (μm)	hcp (μm)	hcl (μm)	aCa_Md (mm2)	aCp_Md (mm2)	aCl_Md (mm2)	ESD_a (deg/nL)
Tomistoma	schlegelii	CEB-140070	Crocodylia	7.551	3.7105	6.813	3.1435	6.8555	4.989	1.658	1.6614	2.0894	5.63075	4.97825	5.92225	0.870939	0.887194	0.685856	21.112	17.356	22.926	0.829	0.8307	1.0447	81.2333	66.0974	102.833	18.83	14.9734	21.3019	0.75611	0.75519	0.73442	0.276197	0.278786	0.164254	27.5345	27.9104	28.0502	0.772384	0.660333	0.734148	100.512	86.65	88.7833	2.02034	2.15237	1.55241	0.0905573
Struthio	camelus	CEB-130023	Aves	6.9775	3.8265	4.2385	2.918	3.725	2.9025	0.8194	0.8912	0.8986	5.402	3.57825	3.31375	0.836212	0.725283	0.626782	27.309	17.533	14.734	0.4097	0.4456	0.4493	83.7381	32.4315	33.1559	25.4585	14.0211	12.1684	0.5025	0.5155	0.481	0.081304	0.108427	0.098488	29.5478	30.0377	30.0687	0.610212	0.65088	0.702136	43.8488	45.34	46.1	1.11362	1.17055	1.19385	0.235533
Meleagris	gallopavo	CEB-130069	Aves	4.7735	2.884	3.248	2.354	3.8125	2.6465	0.6388	0.7158	0.7192	3.82875	2.801	3.2295	0.796856	0.689008	0.719817	20.487	12.868	16.176	0.3194	0.3579	0.3596	40.7574	20.3331	27.2096	18.7758	10.8494	13.5394	-	-	-	0.058304	0.058193	0.057959	28.5092	28.8655	29.3515	0.394571	0.397203	0.361314	34.615	37.9122	38.1043	0.580557	0.501672	0.559508	0.483481
Apus	apus	CEB-140032	Aves	2.2935	1.3205	1.854	1.408	2.114	1.467	0.5282	0.5568	0.5622	1.807	1.631	1.7905	0.81762	0.650578	0.720028	8.918	7.452	10.005	0.2641	0.2784	0.2811	8.58651	6.6883	8.39381	10.0249	6.33356	8.14634	0.32629	0.31285	0.308395	0.065863	0.063552	0.060106	27.8968	27.5387	28.3819	0.238525	0.222083	0.210014	36.8867	32.365	26.135	0.340912	0.351493	0.355454	0.968028
Columba	palumbus	CEB-130137	Aves	3.472	2.3085	2.397	1.726	2.825	1.589	0.5498	0.6096	0.6148	2.89025	2.0615	2.207	0.746941	0.693905	0.826812	16.01	9.911	12.312	0.2749	0.3048	0.3074	24.3677	11.2837	13.4229	15.5878	8.97415	10.7084	0.34834	0.33595	0.3304	0.059754	0.059494	0.058895	28.8545	29.2619	28.8119	0.390995	0.377499	0.317422	34.88	37.1783	33.46	0.396027	0.414901	0.394367	0.965433
Falco	subbuteo	CEB-140011	Aves	3.786	2.4865	3.1115	2.1445	3.396	2.4415	0.734	0.786	0.838	3.13625	2.628	2.91875	0.754098	0.724555	0.695078	16.637	12.925	15.321	0.367	0.393	0.419	25.725	18.5362	23.6599	16.4834	11.0961	13.7849	0.49513	0.485745	0.46484	0.130319	0.122036	0.120958	28.636	28.7455	29.3635	0.460896	0.441935	0.41689	32.5343	38.86	33.135	0.93392	0.942694	0.884359	0.208677
Melopsittacus	undulatus	CEB-140012	Aves	1.7285	1.0975	1.4905	1.0285	1.779	1.129	0.3294	0.3352	0.3066	1.413	1.2595	1.454	0.772558	0.723774	0.772819	5.515	5.323	7.325	0.1647	0.1676	0.1533	4.61527	4.13117	5.62661	5.13091	4.89808	5.97131	0.232	0.2035	0.2215	0.027811	0.026429	0.025168	27.7243	27.5853	28.2124	0.234253	0.246032	0.26525	27.0467	27.1825	27.475	0.212792	0.200083	0.224826	2.38465
Passer	domesticus	CEB-130050	Aves	1.81	1.38	1.39	0.88	1.87	1.18	0.32	0.26	0.39	1.595	1.135	1.525	0.64707	0.774075	0.77577	7.2	4.8	7.7	0.16	0.13	0.195	6.05152	3.24228	5.67084	8.02952	4.42855	6.80702	0.2335	0.227	0.2285	0.027858	0.030248	0.029809	29.1733	28.6207	29.1865	0.21568	0.219516	0.241717	23.4087	26.9417	30.534	0.190799	0.199479	0.204253	2.90276
Carduelis	chloris	CEB-130130	Aves	1.75	1.43	1.18	1.05	1.81	1.09	0.33	0.46	0.43	1.59	1.115	1.45	0.576435	0.456291	0.798338	8	5.672	8.2	0.165	0.23	0.215	6.37011	3.73642	5.70866	8.60229	5.13431	6.60756	-	-	-	0.032274	0.033455	0.03184	28.7823	28.4107	29.1008	0.215858	0.25195	0.252253	23.6871	31.0117	33.0175	0.203512	0.189072	0.205419	2.33073
Turdus	merula	CEB-130075	Aves	2.4955	1.8935	2.0665	1.4275	2.412	1.6775	0.428	0.4612	0.4154	2.1945	1.747	2.04475	0.651364	0.723064	0.718545	12.793	8.694	11.142	0.214	0.2306	0.2077	13.148	8.09666	10.528	12.6346	7.30806	9.23065	-	-	-	0.05549	0.055113	0.051692	28.3584	27.8776	28.5871	0.318208	0.333071	0.335374	34.3725	33.2	33.418	0.395557	0.416103	0.435211	1.11792
Podarcis	wagleriana	CEB-130040	Lepidosauria	1.3755	0.5675	1.1625	0.5605	1.16	0.67	0.187	0.185	0.208	0.9715	0.8615	0.915	0.910923	0.876088	0.81633	3.855	3.206	2.61	0.0935	0.0925	0.104	2.16161	1.61213	2.249	3.54022	2.91884	2.59314	0.195	0.155	0.215	0.023218	0.020115	0.022	29.8	29.3042	28.1661	0.153908	0.169758	0.169646	20	20	20	0.099896	0.098294	0.100946	8.46416
Boa	constrictor	CEB-130166	Lepidosauria	2.4535	0.8555	2.34	0.996	2.4225	1.555	0.501	0.434	0.433	1.6545	1.668	1.98875	0.93724	0.904892	0.766789	6.436	6.729	7.776	0.2505	0.217	0.2165	5.443	6.07358	10.9288	5.56307	5.99006	6.07834	0.3755	0.376	0.3195	0.079643	0.078932	0.060454	27.5284	28.549	27.5556	0.279433	0.301741	0.31797	55.66	62.9925	54.3	0.382252	0.402534	0.348471	1.37756
Varanus	jobiensis	CEB-130032	Lepidosauria	3.4515	1.4645	2.93	1.4015	2.4245	1.6715	0.451	0.497	0.452	2.458	2.16575	2.048	0.905518	0.878181	0.724361	9.787	8.226	8.826	0.2255	0.2485	0.226	12.5618	10.189	12.9043	8.84952	7.69257	8.07055	0.38	0.369	0.356	0.0638344	0.067695	0.053996	29.7453	30.1975	30.3945	0.275753	0.368192	0.299531	51.304	55.0075	45.2875	0.326621	0.356677	0.332136	1.26652
Ornithorhynchus	anatinus	CEB-130091	Mammalia	2.815	1.7825	2.403	1.862	1.9295	1.747	0.3674	0.4024	0.4478	2.29875	2.1325	1.83825	0.773976	0.632127	0.424526	7.655	8.619	8.935	0.1837	0.2012	0.2239	14.0558	12.5355	11.1541	6.60071	6.8099	7.92393	0.2868	0.300405	0.270265	0.052578	0.046418	0.035287	27.8952	28.6366	28.5237	0.390585	0.376251	0.464334	61.6175	53.2967	61.135	0.581922	0.414581	0.437255	0.788125
Dasyurus	viverrinus	CEB-130081	Mammalia	1.9255	1.8105	1.7465	1.4365	1.3495	1.3115	0.2454	0.2586	0.252	1.868	1.5915	1.3305	0.340415	0.568762	0.235636	7.618	7.355	4.949	0.1227	0.1293	0.126	9.88851	7.21863	5.18488	7.02705	6.5403	5.14352	-	-	-	0.029503	0.034694	0.028672	27.793	26.908	27.692	0.229805	0.24841	0.238096	36.6467	34.306	31.5833	0.287307	0.289569	0.260245	1.58404
Isoodon	obesulus	CEB 130085	Mammalia	1.794	1.758	1.5305	1.119	1.1845	1.154	0.199	0.219	0.228	1.776	1.32475	1.16925	0.199327	0.682234	0.225467	6.319	5.206	4.847	0.0995	0.1095	0.114	8.63855	5.06784	4.13512	6.36131	5.05116	4.23971	-	-	-	0.023182	0.023993	0.023508	26.6867	27.4118	28.561	0.245692	0.265376	0.235045	42.2936	48.9957	42.0363	0.23725	0.215164	0.221121	2.45593
Phascolarctos	cinereus	CEB 130095	Mammalia	2.6	2.55	2.8	2.08	2.33	1.97	0.35	0.37	0.42	2.575	2.44	2.15	0.195171	0.66945	0.533986	9.4	10.3	8.4	0.175	0.185	0.21	19.8794	17.239	15.2296	9.36131	9.69331	9.70961	-	-	-	0.045816	0.046524	0.041388	26.7038	26.363	27.3807	0.384635	0.455405	0.441945	53.5691	57.5267	49.6062	0.449207	0.428612	0.439626	1.07322
Procavia	capensis	CEB-150012	Mammalia	2.5105	1.786	2.641	1.8645	2.063	1.6195	0.325	0.368	0.377	2.14825	2.25275	1.84125	0.702775	0.708229	0.619468	9.668	9.058	8.41	0.1625	0.184	0.1885	15.3722	14.7107	10.7983	9.27597	9.61331	7.69679	-	-	-	0.041816	0.045479	0.042705	29.5715	28.9663	28.543	0.289684	0.313025	0.33761	45.8137	48.1389	54.381	0.367167	0.37644	0.33242	1.40072
Elephas	maximus	CEB-150009	Mammalia	7.115	5.091	5.8375	5.037	5.631	4.089	1.61	1.662	1.458	6.103	5.43725	4.86	0.698581	0.505427	0.687527	22.045	22.524	19.402	0.805	0.831	0.729	98.6989	86.2917	64.8892	22.4138	20.9396	17.3517	0.86216	0.709945	0.787825	0.304872	0.250663	0.192462	27.0804	26.3787	27.67	0.647977	0.62322	0.623568	77.1583	66.637	69.1329	2.86558	2.10151	2.72142	0.0581134
Elephantulus	sp.	MNHN.AC.ZM.1930-92	Mammalia	1.36	1.28	1.36	0.9	1.29	0.96	0.26	0.24	0.27	1.32	1.13	1.125	0.337915	0.749712	0.667972	5.6	5.3	4.7	0.13	0.12	0.135	5.45008	3.53452	3.54086	5.23765	4.64575	4.28902	-	-	-	0.026055	0.026867	0.029536	28.5069	29.6835	28.4737	0.248223	0.232567	0.228478	33.9867	31.1278	37.98	0.210683	0.17429	0.220735	3.55468
Sciurus	vulgaris	CEB-130021	Mammalia	2.467	2.1745	2.0475	1.714	1.8385	1.815	0.2178	0.2316	0.2682	2.32075	1.88075	1.82675	0.472305	0.547022	0.159377	9.457	7.745	8.502	0.1089	0.1158	0.1341	15.9356	10.229	10.7656	9.1278	7.76155	7.98764	0.185	0.185	0.21	0.021625	0.021233	0.020919	26.8959	27.3485	27.2249	0.332049	0.322355	0.294551	52.5	47.7778	44.2857	0.296346	0.273961	0.271075	2.09364
Oryctolagus	cuniculus	CEB-130035	Mammalia	2.5925	2.2405	2.001	1.662	2.019	1.8095	0.2942	0.2996	0.3128	2.4165	1.8315	1.91425	0.503108	0.556892	0.443578	9.794	8.543	9.376	0.1471	0.1498	0.1564	15.8413	9.79499	10.8988	9.10468	7.6739	8.46178	0.27338	0.2425	0.211	0.043415	0.046586	0.040529	26.8827	26.4104	26.7794	0.303714	0.281726	0.317624	48.1587	46.2888	51.5833	0.412484	0.324807	0.374577	1.18394
Tupaia	javanica	CEB-130099	Mammalia	1.582	1.433	1.601	0.986	1.436	1.132	0.2292	0.2332	0.2602	1.5075	1.2935	1.284	0.423673	0.787852	0.61529	6.617	5.895	6.067	0.1146	0.1166	0.1301	7.38614	4.58233	5.38261	6.63516	5.11069	6.10474	-	-	-	0.023361	0.02553	0.027967	26.5699	27.0701	27.2189	0.290093	0.286372	0.310635	27.7857	32.7075	31.3817	0.196325	0.203059	0.205327	3.8911
Nycticebus	coucang	CEB-130090	Mammalia	1.971	1.9615	1.926	1.5535	1.9815	1.362	0.3416	0.3306	0.3584	1.96625	1.73975	1.67175	0.098064	0.591106	0.726319	7.96	7.247	7.735	0.1708	0.1653	0.1792	12.1012	8.23711	8.88345	7.18032	6.33028	7.02554	-	-	-	0.040054	0.042476	0.042167	27.7817	28.6264	27.6933	0.283405	0.285339	0.317038	44.6629	46.4062	45.9667	0.405076	0.379336	0.423899	1.29205
Euoticus	elegantulus	CEB-140055	Mammalia	1.9475	1.838	2.037	1.6635	2.241	1.503	0.241	0.244	0.2426	1.89275	1.85025	1.872	0.330591	0.577144	0.741744	8.13	8.387	9.059	0.1205	0.122	0.1213	10.5364	9.35371	10.5276	7.6063	8.14865	7.64792	-	-	-	0.039167	0.035769	0.030623	27.3746	26.7168	28.0222	0.268759	0.278615	0.247603	43.6925	49.18	48.1129	0.465764	0.438563	0.43428	0.955329
Microcebus	sp.	CEB-140043	Mammalia	1.4705	1.164	1.3	1.071	1.354	1.0895	0.199	0.234	0.2184	1.31725	1.1855	1.22175	0.611082	0.566813	0.593746	5.168	5.436	5.744	0.0995	0.117	0.1092	4.84353	3.85166	4.63455	4.93807	4.84309	4.7829	0.163	0.1832	0.213515	0.023263	0.020577	0.022059	26.8008	26.1883	26.3636	0.259824	0.25745	0.261516	34.95	32.44	35.7767	0.236047	0.201227	0.226924	3.0391
Lemur	catta	CEB-130135	Mammalia	2.423	2.2	2.4035	1.839	2.065	1.891	0.2678	0.2962	0.3238	2.3115	2.12125	1.978	0.419045	0.643871	0.401775	9.209	8.819	9.264	0.1339	0.1481	0.1619	17.0031	12.8052	12.0117	8.5381	8.06799	8.07003	-	-	-	0.033504	0.041091	0.036003	26.9667	26.9399	27.9311	0.304652	0.412453	0.348443	46.056	55.2125	42.268	0.431608	0.406316	0.400087	1.11327
Saimiri	sciureus	CEB-130037	Mammalia	2.381	2.336	2.251	1.7135	2.1445	1.9755	0.4	0.4	0.428	2.3585	1.98225	2.06	0.193499	0.648497	0.389104	8.709	8.504	9.774	0.2	0.2	0.214	16.0744	12.7914	13.6809	8.89175	8.67723	9.58732	-	-	-	0.033523	0.038207	0.033876	27.5351	27.3925	27.6848	0.315296	0.387772	0.353744	48.6533	50.28	53.6229	0.54327	0.51687	0.496768	0.730316
Callithrix	jacchus	CEB-130123	Mammalia	1.9255	1.5175	2.0575	1.476	1.869	1.564	0.476	0.422	0.485	1.7215	1.76675	1.7165	0.615538	0.696687	0.547492	5.949	7.788	7.735	0.238	0.211	0.2425	8.0315	9.34121	8.69003	5.45156	7.17948	6.88522	-	-	-	0.049247	0.042237	0.041321	26.8903	27.7642	28.2135	0.302687	0.338523	0.299281	47.5825	47.0925	45.316	0.414389	0.395957	0.400986	1.24701
Papio	hamadryas	CEB-140064	Mammalia	3.445	3.4065	2.9285	2.8515	3.2435	3.2005	0.5436	0.4606	0.5324	3.42575	2.89	3.222	0.149085	0.227805	0.162292	13.282	13.669	15.635	0.2718	0.2303	0.2662	34.141	26.7434	34.2063	13.2432	12.6308	14.3245	-	-	-	0.059439	0.048052	0.045493	27.0441	26.644	26.1711	0.524314	0.527222	0.527596	72.0425	73.7814	67.5389	0.928462	0.760398	0.928814	0.376786
Macaca	mulatta	CEB-130105	Mammalia	2.9185	2.605	3.0605	2.6695	2.819	2.692	0.3766	0.452	0.399	2.76175	2.865	2.7555	0.450885	0.489073	0.296771	11.498	12.973	13.561	0.1883	0.226	0.1995	24.2978	24.9587	23.1504	11.2002	12.6508	12.2316	0.299525	0.300625	0.31814	0.051175	0.048707	0.048558	29.4946	28.4698	27.915	0.40124	0.407768	0.423701	61.0171	65.28	62.5114	0.751719	0.728021	0.675604	0.460665
Macaca	fascicularis	CEB-130104	Mammalia	2.971	2.8715	2.885	2.462	2.5555	2.441	0.4372	0.4474	0.457	2.92125	2.6735	2.49825	0.25663	0.52129	0.295978	11.827	12.203	11.673	0.2186	0.2237	0.2285	25.6339	20.6661	19.4202	10.9384	10.811	10.8511	-	-	-	0.057807	0.060057	0.057981	29.3813	28.6842	28.0887	0.31523	0.345656	0.347406	51.516	63.92	48.625	0.68827	0.685648	0.656323	0.506802
Homo	sapiens	CEB-130017	Mammalia	4.0585	3.772	4.2895	3.8085	3.7995	3.601	0.722	0.812	0.745	3.91525	4.049	3.70025	0.369055	0.460103	0.318995	15.425	18.512	15.8	0.361	0.406	0.3725	46.3637	50.6396	41.0505	15.4892	18.8436	15.2733	0.4375	0.4755	0.404	0.107729	0.115499	0.089922	28.1607	27.9019	28.6361	0.596264	0.512783	0.617954	75.177	58.72	70.1022	1.12575	1.00835	1.1471	0.275272
Carollia	perspicillata	CEB-130059	Mammalia	0.984	0.9475	0.9455	0.7985	0.9535	0.721	0.16	0.151	0.162	0.96575	0.872	0.83725	0.269835	0.535513	0.654385	3.362	3.622	3.53	0.08	0.0755	0.081	2.65548	2.27682	2.25718	3.31645	3.67192	3.40107	0.151205	0.13807	0.13285	0.010834	0.008671	0.012045	26.5748	27.539	26.8574	0.158994	0.159784	0.153907	19.6543	22.276	24.4238	0.097372	0.088608	0.109575	10.8109
Pteropus	rodricensis	CEB-130097	Mammalia	1.534	1.3865	1.3645	1.198	1.317	1.253	0.192	0.219	0.281	1.46025	1.28125	1.285	0.427858	0.478702	0.307943	5.952	5.757	6.63	0.096	0.1095	0.1405	7.03287	4.87453	5.04763	5.18514	4.82214	5.07874	0.162555	0.177235	0.162395	0.019838	0.02197	0.017964	28.1103	28.215	28.3404	0.185688	0.176303	0.172308	31.9044	29.3033	27.6033	0.239166	0.195763	0.188423	2.50551
Cynictis	penicillata	CEB-130049	Mammalia	2.3185	2.0225	2.379	1.9305	2.1885	1.833	0.312	0.326	0.326	2.1705	2.15475	2.01075	0.488915	0.584387	0.546345	7.624	9.438	10.248	0.156	0.163	0.163	12.5681	14.2336	11.8649	7.24951	8.95021	9.01178	-	-	-	0.040342	0.04758	0.034665	27.4581	27.3608	27.6308	0.308433	0.270834	0.319581	50.3883	50.3083	49.0063	0.374426	0.355101	0.369897	1.5051
Felis	catus	CEB-130151	Mammalia	2.1125	1.7755	1.908	1.9005	1.7915	1.762	0.29	0.28	0.29	1.944	1.90425	1.77675	0.541853	0.0885787	0.180727	6.858	8.223	7.159	0.145	0.14	0.145	12.0615	11.4273	9.98799	7.19938	7.86352	7.21324	0.225935	0.226445	0.278	0.062117	0.052935	0.05325	25.1622	25.4658	27.2212	0.361515	0.370419	0.326712	55.596	60.364	52.46	0.566429	0.564064	0.552163	0.794644
Canis	lupus_familiaris	CEB-130128	Mammalia	3.962	3.3915	3.5025	3.0605	3.757	2.918	0.44	0.3872	0.4288	3.67675	3.2815	3.3375	0.516964	0.486278	0.629891	14.955	14.575	15.779	0.22	0.1936	0.2144	39.7199	32.8057	33.8577	13.6312	13.692	15.7996	-	-	-	0.070584	0.052884	0.05943	27.1165	27.5567	28.0773	0.415385	0.434786	0.400941	42.197	55.8	53.3433	0.732357	0.666864	0.685031	0.561125
Nasua	nasua	CEB-130033	Mammalia	2.078	1.8845	1.7725	1.665	1.7055	1.67	0.326	0.3018	0.3166	1.98125	1.71875	1.68775	0.421385	0.342957	0.20297	7.63	7.219	8.098	0.163	0.1509	0.1583	11.5983	8.38406	9.51066	7.07314	6.62176	7.24731	-	-	-	0.03556	0.044448	0.027764	25.8368	26.129	27.4038	0.248634	0.239708	0.291851	52.4338	44.32	50.3389	0.394543	0.360091	0.332768	1.26848
Equus	ferus_caballus	CEB-130056	Mammalia	5.1665	4.138	4.571	4.0295	4.939	3.453	0.46	0.44	0.46	4.65225	4.30025	4.196	0.598759	0.472117	0.714995	17.679	19.107	19.452	0.23	0.22	0.23	63.2309	56.5773	49.9538	17.4852	18.8905	17.2662	-	-	-	0.078938	0.093373	0.082927	26.4471	26.0976	28.1401	0.616666	0.539851	0.515884	71.427	62.8975	68.8071	0.949336	0.838841	0.826497	0.366557
Vicugna	pacos	CEB-130038	Mammalia	3.4205	2.9685	3.7695	2.5185	3.301	2.503	0.41	0.4	0.4	3.1945	3.144	2.902	0.496817	0.744048	0.651958	12.66	14.153	13.671	0.205	0.2	0.2	33.8485	30.7927	25.8348	12.5844	13.4277	11.7756	-	-	-	0.084554	0.077266	0.06729	26.499	26.1377	26.9763	0.383791	0.429769	0.35661	50.3083	44.8067	43.1186	0.805359	0.772552	0.830755	0.400162
Sus	scrofa_domesticus	CEB-130005	Mammalia	3.1915	2.7745	3.2095	2.333	2.8215	2.6005	0.4494	0.41	0.4178	2.983	2.77125	2.711	0.494214	0.686739	0.387968	11.738	11.821	11.642	0.2247	0.205	0.2089	30.7976	22.0229	22.8402	10.9827	10.167	10.6607	0.343	0.3365	0.358	0.075199	0.086667	0.062579	26.8139	26.7397	27.3112	0.373946	0.396483	0.411317	48.7043	66.3143	54.8722	0.80413	0.716757	0.701317	0.407561
Bos	primigenius_taurus	CEB-130029	Mammalia	4.6485	3.5295	4.503	3.245	3.978	3.0905	0.46	0.51	0.5	4.089	3.874	3.53425	0.650767	0.693319	0.629627	15.517	17.362	15.547	0.23	0.255	0.25	47.4722	44.9889	33.9254	14.6599	16.3916	14.0125	0.378705	0.460135	0.394845	0.100244	0.109583	0.104356	25.8522	25.835	25.4075	0.499745	0.500358	0.516354	60.576	70.6444	60.5518	1.01499	1.00432	0.937361	0.303266
Etroplus	maculatus	Specimen from Schulz-Mirbach, T., Heß, M., Metscher, B. D., & Ladich, F. (2013). A unique swim bladder-inner ear connection in a teleost fish revealed by a combined high-resolution microtomographic and three-dimensional histological study. BMC biology, 11(1), 1-13.	Actinopterygii	1.20885	0.6935	0.74	0.458	0.475	0.522	-	-	-	0.951175	0.599	0.4985	0.819076	0.785455	0.414692	2.83	1.965	1.954	0.205248	0.199802	0.171883	2.39348	1.19387	0.846494	2.99034	1.99777	2.14182	0.305542	0.285584	0.241784	0.0514813	0.0500194	0.0376387	26.1427	25.0463	26.2289	0.132352	0.145984	0.165172	25.3523	27.5911	29.1175	0.1689	0.092728	0.1769	3.35198
Poecilia	sphenops	Specimen from Schulz-Mirbach et al.: Sensory epithelia of the fish inner ear in 3D: studied with high-resolution contrast enhanced microCT. Frontiers in Zoology 2013 10:63.	Actinopterygii	0.9115	0.468	0.6435	0.366	0.607	0.616	-	-	-	0.68975	0.50475	0.6115	0.858126	0.8225	0.170315	2.091	1.408	2.536	0.164873	0.166908	0.114117	1.45159	0.746839	1.26969	2.05099	1.32997	2.32396	0.25786	0.249073	0.175835	0.0376874	0.0386784	0.0209587	25.2169	24.7959	25.5892	0.167092	0.128908	0.157245	28.2122	26.102	26.5762	0.101717	0.083005	0.101192	8.83863
Steatocranus	tinanti	Specimen from Schulz-Mirbach et al.: Sensory epithelia of the fish inner ear in 3D: studied with high-resolution contrast enhanced microCT. Frontiers in Zoology 2013 10:63.	Actinopterygii	0.84	0.471	0.55	0.366	0.496	0.439	-	-	-	0.6555	0.458	0.4675	0.828009	0.746438	0.465438	2.139	1.669	1.824	0.157627	0.184577	0.148215	1.2582	0.625869	0.697622	1.97823	1.56117	1.62041	0.249037	0.268879	0.215475	0.035351	0.0446614	0.0304555	24.7908	24.3444	26.0387	0.151953	0.127186	0.1698	27.018	25.9446	26.8742	0.087097	0.102741	0.084956	11.0855
Rana	pipiens	Specimen from Mason, M.J., Segenhout, J.M., Cobo-Cuan, A. et al. The Frog Inner Ear: Picture Perfect?. JARO 16, 171–188 (2015).	Amphibia	1.60164	0.94284	1.3959	1.10727	2.12274	2.0898	0.5562	0.5994	0.513	1.27224	1.25158	2.10627	0.808372	0.608922	0.175484	4.29138	4.6494	6.72624	0.2781	0.2997	0.2565	5.77546	5.71724	8.50039	4.21863	4.68091	6.1684	-	-	-	0.0574417	0.0570844	0.0550846	26.2514	25.2036	25.7052	0.291002	0.314095	0.316724	36.0696	38.2569	40.1157	0.293641	0.261565	0.24786	1.8074
Eleutherodactylus	limbatus	Specimen from Mason, M.J., Segenhout, J.M., Cobo-Cuan, A. et al. The Frog Inner Ear: Picture Perfect?. JARO 16, 171–188 (2015).	Amphibia	0.4602	0.2548	0.3978	0.2184	0.4498	0.3926	0.1716	0.1872	0.2236	0.3575	0.3081	0.4212	0.832735	0.835809	0.48802	0.90792	0.81952	1.4196	0.0858	0.0936	0.1118	0.314233	0.254553	0.418341	1.0087	0.924504	1.03257	-	-	-	0.0184986	0.0185567	0.0262517	25.9902	25.4063	26.3316	0.0922068	0.112733	0.0953993	21.3627	24.5635	19.3771	0.048	0.05	0.047	24.9895
Xenopus	laevis	Specimen from Mason, M.J., Segenhout, J.M., Cobo-Cuan, A. et al. The Frog Inner Ear: Picture Perfect?. JARO 16, 171–188 (2015).	Amphibia	1.15525	0.6405	0.95	0.5595	1.3585	1.006	0.3	0.33	0.285	0.897875	0.75475	1.18225	0.832233	0.808171	0.672031	2.7655	2.404	4.737	0.15	0.165	0.1425	1.83601	1.54149	3.21121	2.68424	2.63594	4.03629	-	-	-	0.0367275	0.0416752	0.035684	26.3937	26.2432	26.1497	0.15675	0.169678	0.161954	27.4043	29.475	28.2561	0.134	0.164	0.149	5.3581
Trachemys	scripta	Specimen from Serjoscha W Evers, James M Neenan, Gabriel S Ferreira, Ingmar Werneburg, Paul M Barrett, Roger B J Benson, Neurovascular anatomy of the protostegid turtle Rhinochelys pulchriceps and comparisons of membranous and endosseous labyrinth shape in an extant turtle, Zoological Journal of the Linnean Society, Volume 187, Issue 3, November 2019, Pages 800–828	Testudinata	3.37	1.415	2.94	1.415	2.625	1.84	0.89	1.09	1.01	2.3925	2.1775	2.2325	0.907579	0.87656	0.713208	8.09	8.16	8.51	0.445	0.545	0.505	14.8826	13.4565	14.4301	8.59831	8.84928	7.92552	-	-	-	0.19	0.16	0.17	27.7061	26.5406	27.187	0.421796	0.484536	0.340312	42.2883	45.6411	47.9573	0.988	0.89	0.784	0.262906
This dataset is duplicated in the 3D bony sample and is used to relate membranous and bony labyrinths.
Maj_a_B	: Semi-major axis of the anterior bony semicircular canal
Min_a_B	: Semi-minor axis of the anterior bony semicircular canal
Maj_p_B	: Semi-major axis of the posterior bony semicircular canal
Min_p_B	: Semi-minor axis of the posterior bony semicircular canal
Maj_l_B	: Semi-major axis of the lateral bony semicircular canal
Min_l_B	: Semi-minor axis of the lateral bony semicircular canal
dS_a_B	: Average transverse diameter of the lumen of the slender part of the anterior bony semicircular canal
dS_p_B	: Average transverse diameter of the lumen of the slender part of the posterior bony semicircular canal
dS_l_B	: Average transverse diameter of the lumen of the slender part of the lateral bony semicircular canal
R_a_B	: Radius of curvature of the anterior bony semicircular canal
R_p_B	: Radius of curvature of the posterior bony semicircular canal
R_l_B	: Radius of curvature of the lateral bony semicircular canal
e_a_B	: Eccentricity of the anterior bony semicircular canal
e_p_B	: Eccentricity of the posterior bony semicircular canal
e_l_B	: Eccentricity of the lateral bony semicircular canal
LS_a_B	: External length of the slender part of the anterior bony semicircular canal
LS_p_B	: External length of the slender part of the posterior bony semicircular canal
LS_l_B	: External length of the slender part of the lateral bony semicircular canal
rS_a_B	: Average transverse radius of the lumen of the slender part of the anterior bony semicircular canal
rS_p_B	: Average transverse radius of the lumen of the slender part of the posterior bony semicircular canal
rS_l_B	: Average transverse radius of the lumen of the slender part of the lateral bony semicircular canal
This dataset is only measured on the membranous semicircular ducts
ASD_a	: Area enclosed by the central streamline of the anterior semicircular duct
ASD_p	: Area enclosed by the central streamline of the posterior semicircular duct
ASD_l	: Area enclosed by the central streamline of the lateral semicircular duct
LS_a	: Length of the slender part of the anterior semicircular duct
LS_p	: Length of the slender part of the posterior semicircular duct
LS_l	: Length of the slender part of the lateral semicircular duct
dS_a_Out	: Transverse diameter of the slender part of the anterior semicircular duct (including the walls)
dS_p_Out	: Transverse diameter of the slender part of the posterior semicircular duct (including the walls)
dS_l_Out	: Transverse diameter of the slender part of the lateral semicircular duct (including the walls)
aS_a	: Average cross-sectional area of the slender part of the anterior semicircular duct
aS_p	: Average cross-sectional area of the slender part of the posterior semicircular duct
aS_l	: Average cross-sectional area of the slender part of the lateral semicircular duct
wS_a	: Wall shape drage factor of the slender part of the anterior semicircular duct
wS_p	: Wall shape drage factor of the slender part of the posterior semicircular duct
wS_l	: Wall shape drage factor of the slender part of the lateral semicircular duct
tCa	: Average thickness of the anterior cupula model
tCp	: Average thickness of the posterior cupula model
tCl	: Average thickness of the lateral cupula model
aCa_Md	: Cross-sectional area of the middle section of the anterior cupula
aCp_Md	: Cross-sectional area of the middle section of the posterior cupula
aCl_Md	: Cross-sectional area of the middle section of the lateral cupula
hca	: height of the cilia area of the crista ampullaris of the anterior semicircular ducts
hcp	: height of the cilia area of the crista ampullaris of the posterior semicircular ducts
hcl	: height of the cilia area of the crista ampullaris of the lateral semicircular ducts
ESD_a	: Deflection factor of the anterior cupula
ESD_p	: Deflection factor of the posterior cupula
ESD_l	: Deflection factor of the lateral cupula
e_A_a	: Area error factor of the anterior semicircular canal
e_A_p	: Area error factor of the posterior semicircular canal
e_A_l	: Area error factor of the lateral semicircular canal
t_e_Ls_a	: Slender length error factor of the anterior semicircular canal
t_e_Ls_p	: Slender length error factor of the posterior semicircular canal
t_e_Ls_l	: Slender length error factor of the lateral semicircular canal
CBL	: Condylobasal length
CAOL	: Condylo-anteroorbital length
BM	: Body mass
BT	: Body temperature
TR	: Thermic regime
VR	: Viscosity relative to water
Predicted missing measurements are shown in blue
[truncated: 19 more columns]

## Sheet: 2D Membranous Sample
Genus	Species	Major Clade	Clade	Maj_a_B (mm)	Min_a_B (mm)	Maj_p_B (mm)	Min_p_B (mm)	Maj_l_B (mm)	Min_l_B (mm)	R_a_B (mm)	R_p_B (mm)	R_l_B (mm)	R_B (mm)	e_a_B	e_p_B	e_l_B	LS_a_B (mm)	LS_p_B (mm)	LS_l_B (mm)	rS_a_B (mm)	rS_p_B (mm)	rS_l_B (mm)	ASD_a (mm2)	ASD_p (mm2)	ASD_l (mm2)	dS_a_Out (mm)	dS_p_Out (mm)	dS_l_Out (mm)	aS_a (mm2)	aS_p (mm2)	aS_v (mm2)	aS_l (mm2)	aS (mm2)	wS_a	wS_p	wS_l	δE:Ra	δE:Rp	δE:Rl	e_A_a	e_A_p	e_A_l	t_e_Ls_a	t_e_Ls_p	t_e_Ls_l	CBL (mm)	CAOL (mm)	BM (g)	BT ( C)
Opsanus	tau	Actinopterygii	Acanthopterygii	4.8135	2.1155	3.1235	2.8635	4.946	3.4635	3.4645	2.9935	4.20475	3.55425	0.898246	0.399438	0.713885	11.452	9.153	14.136	0.658779	0.556088	0.422966	32.533	25.037	50.824	0.754	0.622	0.487	0.242333	0.306333	0.274333	0.185667	0.252167	25.593	25.0051	26.0995	0.591707	0.486983	0.458327	1.01695	0.891033	0.944386	0.985126	0.964299	0.955708	186.003	140.911	807	20.7
Leuciscus	leuciscus	Actinopterygii	Otocephala	4.30152	2.42571	3.42458	2.47354	3.70341	2.88488	3.36361	2.94906	3.29415	3.2	0.82583	0.691591	0.627049	8.17213	8.01506	10.9696	0.298668	0.308071	0.247086	33.0988	25.9371	33.8034	0.408563	0.396953	0.32062	0.0891377	0.0862437	0.0876907	0.0601844	0.0804248	26.0125	25.5235	26.4238	0.64379	0.568184	0.612232	1.00972	0.974639	1.00712	0.981481	0.964431	0.940324	19.5	14.4	37.24	13
Tinca	tinca	Actinopterygii	Otocephala	4.30152	2.42571	3.42458	2.47354	3.70341	2.88488	3.36361	2.94906	3.29415	3.2	0.82583	0.691591	0.627049	8.17213	8.01506	10.9696	0.380207	0.39181	0.314248	33.0988	25.9371	33.8034	0.492561	0.476594	0.386538	0.125698	0.121617	0.123658	0.0848694	0.113411	26.0125	25.5235	26.4238	0.64379	0.568184	0.612232	1.00972	0.974639	1.00712	0.981481	0.964431	0.940324	40.7065	25.7945	95.3023	14
Merluccius	merluccius	Actinopterygii	Paracanthopterygii	7.49147	4.80158	7.34361	4.42963	8.02417	5.11212	6.14653	5.88662	6.56814	6.2	0.767592	0.797594	0.77079	14.7627	15.5757	23.8154	0.353041	0.393624	0.294238	116.439	99.5458	133.061	0.465075	0.478272	0.36726	0.122028	0.109503	0.115766	0.0851504	0.107521	25.6756	25.1071	26.1634	0.60196	0.502969	0.488626	1.03038	0.974083	1.03252	0.984409	0.964325	0.95268	94.77	58.54	592.84	10.2
Perca	fluviatilis	Actinopterygii	Acanthopterygii	6.86288	4.7038	4.60682	3.4919	3.65884	3.67575	5.78334	4.04936	3.6673	4.5	0.72817	0.652272	0.095798	20.4945	14.7765	13.8713	0.382406	0.378363	0.239281	100.444	55.9045	39.8117	0.494767	0.464104	0.312717	0.124023	0.127305	0.125664	0.0615752	0.101788	25.593	25.0051	26.0995	0.591707	0.486983	0.458327	0.99042	1.1062	0.942261	0.985126	0.964299	0.955708	37.785	24.562	202.141	16
Molva	dypterygia	Actinopterygii	Paracanthopterygii	9.42476	6.0407	9.23874	5.57276	10.0949	6.43137	7.73273	7.40575	8.26315	7.8	0.767592	0.797594	0.77079	18.5725	19.5953	29.9613	0.854369	0.948222	0.527884	184.291	157.554	210.599	0.922204	0.933337	0.578575	0.429513	0.384788	0.40715	0.19635	0.331831	25.6756	25.1071	26.1634	0.60196	0.502969	0.488626	1.03038	0.974083	1.03252	0.984409	0.964325	0.95268	158.5	111.195	2370.97	6.3
Brama	brama	Actinopterygii	Acanthopterygii	6.1642	3.39777	4.44067	3.19295	4.68119	3.92519	4.78098	3.81681	4.30319	4.3	0.834366	0.694984	0.544896	8.77884	7.74001	11.0976	0.304394	0.304548	0.267166	66.7145	43.877	59.0917	0.414617	0.393496	0.340704	0.0902389	0.0913452	0.090792	0.0706858	0.0855299	25.5935	25.0056	26.0998	0.591758	0.487063	0.458478	1.01391	0.985023	1.02367	0.985123	0.964299	0.955693	56.78	36.07	762.33	11.8
Microstomus	kitt	Actinopterygii	Acanthopterygii	5.28432	2.87964	3.77026	2.77585	4.08688	3.40007	4.08198	3.27305	3.74348	3.7	0.838475	0.676712	0.554854	7.82287	6.834	9.86275	0.355823	0.352161	0.34011	48.4879	32.1942	44.4626	0.467911	0.439454	0.411056	0.111931	0.114892	0.113411	0.101788	0.107521	25.593	25.0051	26.0995	0.591707	0.486983	0.458327	1.01428	0.979177	1.01851	0.985126	0.964299	0.955708	24.32	15.79	312.65	9.9
Scomber	scombrus	Actinopterygii	Acanthopterygii	5.81185	2.92356	3.394	1.8938	3.02812	2.74866	4.36771	2.6439	2.88839	3.3	0.864267	0.82985	0.419599	18.4268	9.17374	11.1365	0.355001	0.35393	0.275668	56.7627	20.2392	22.9104	0.467073	0.441132	0.349106	0.112331	0.113233	0.112782	0.0739233	0.101788	25.5935	25.0056	26.0998	0.591758	0.487063	0.458478	1.06338	1.0023	0.87617	0.985123	0.964299	0.955693	38.61	25.432	206.753	10.2
Conger	conger	Actinopterygii	Elopomorpha	6.86345	3.57595	5.34194	3.38794	5.52204	4.16722	5.2197	4.36494	4.84463	4.8	0.853548	0.773157	0.656123	12.9927	12.2568	16.9945	0.606053	0.625467	0.435259	75.8994	57.7689	76.1801	0.70682	0.680174	0.497971	0.251985	0.240616	0.246301	0.138544	0.204282	26.1932	25.7468	26.5636	0.666235	0.603177	0.678557	0.984363	1.01604	1.05377	0.97991	0.964489	0.933695	87.62	58.08	1525.64	8.7
Esox	lucius	Actinopterygii	Protacanthopterygii	5.43576	3.00776	4.76533	4.22085	5.44464	3.52566	4.22176	4.49309	4.48515	4.4	0.832963	0.464176	0.762026	13.9951	15.1702	18.7814	0.495721	0.509048	0.410051	53.4792	56.0341	58.5142	0.604932	0.581568	0.475397	0.18349	0.178421	0.180956	0.125664	0.159043	25.9139	25.4016	26.3476	0.631547	0.549096	0.576055	1.04119	0.886768	0.970289	0.982338	0.9644	0.94394	84.14	40.022	641.599	19
Reinhardtius	hippoglossoides	Actinopterygii	Acanthopterygii	6.99815	3.81357	4.99305	3.67612	5.41235	4.5028	5.40586	4.33458	4.95758	4.9	0.838475	0.676712	0.554854	10.36	9.05043	13.0615	0.67587	0.667251	0.450357	85.0398	56.4633	77.9801	0.769108	0.714458	0.511352	0.279051	0.286435	0.282743	0.152053	0.237583	25.593	25.0051	26.0995	0.591707	0.486983	0.458327	1.01428	0.979177	1.01851	0.985126	0.964299	0.955708	102.71	69.74	1354.39	3
Brosme	brosme	Actinopterygii	Paracanthopterygii	5.79985	3.71735	5.68538	3.42939	6.21226	3.95777	4.7586	4.55738	5.08501	4.8	0.767592	0.797594	0.77079	11.4292	12.0586	18.4377	0.54092	0.601406	0.359564	69.7906	59.6653	79.7534	0.647234	0.660183	0.429225	0.224036	0.200707	0.212372	0.113411	0.173494	25.6756	25.1071	26.1634	0.60196	0.502969	0.488626	1.03038	0.974083	1.03252	0.984409	0.964325	0.95268	85.15	60.63	1258.49	3.6
Melamphaes	laeviceps	Actinopterygii	Acanthopterygii	2.9125	1.876	1.8005	1.514	1.93	1.44159	2.39425	1.65725	1.6858	1.91243	0.764924	0.541225	0.664892	8.098	4.556	7.17497	0.344173	0.378252	0.276576	18.123	7.317	10.1616	0.456	0.464	0.35	0.103491	0.118847	0.111169	0.0615752	0.0987707	25.6099	25.0259	26.1126	0.593799	0.490244	0.464508	1.0558	0.854406	1.16256	0.98498	0.964304	0.95509	19.79	14.02	7.31	1.9
Poromitra	crassiceps	Actinopterygii	Acanthopterygii	2.7175	2.541	2.4895	2.1655	2.7365	1.8839	2.62925	2.3275	2.3102	2.42232	0.354514	0.49331	0.7253	8.248	6.555	9.75462	0.455963	0.467381	0.331563	23.353	13.979	14.7935	0.567	0.545	0.403	0.132025	0.146574	0.1393	0.0646925	0.120648	25.6099	25.0259	26.1126	0.593799	0.490244	0.464508	1.07651	0.825384	0.913413	0.98498	0.964304	0.95509	19.04	12.93	7.56	3.2
Scopelogadus	mizolepis bispinosus	Actinopterygii	Acanthopterygii	1.588	1.2445	1.3785	1.011	1.492	1.07044	1.41625	1.19475	1.28122	1.29741	0.621152	0.679791	0.69661	3.869	3.246	5.20434	0.250927	0.165084	0.180353	6.124	3.657	4.59237	0.357	0.247	0.251	0.0924013	0.0352989	0.0638501	0.0286521	0.0550506	25.6099	25.0259	26.1126	0.593799	0.490244	0.464508	0.98637	0.835251	0.915288	0.98498	0.964304	0.95509	13.6	7.12	2.38	3.2
Antimora	rostrata	Actinopterygii	Paracanthopterygii	3.6225	2.4795	4.272	2.2055	4.92	2.287	3.051	3.23875	3.6035	3.29775	0.729039	0.856427	0.885396	8.286	9.327	14.728	0.588599	0.692592	0.505027	29.41	28.595	36.857	0.691	0.735	0.559	0.26512	0.223123	0.244121	0.19089	0.230814	25.6756	25.1071	26.1634	0.60196	0.502969	0.488626	1.04225	0.966055	1.04265	0.984409	0.964325	0.95268	76.97	46.89	602	2.9
Synaphobranchus	kaupii	Actinopterygii	Elopomorpha	2.851	1.1925	1.656	1.037	4.112	2.31928	2.02175	1.3465	3.21564	2.19463	0.908321	0.779656	0.825756	4.788	3.149	10.8916	0.50321	0.532695	0.444305	10.603	5.606	32.4322	0.612	0.602	0.506	0.215651	0.20109	0.208371	0.119459	0.186143	26.1932	25.7468	26.5636	0.666235	0.603177	0.678557	0.992712	1.03912	1.08248	0.97991	0.964489	0.933695	41.14	25.5	153.14	3.4
Histiobranchus	bathybius	Actinopterygii	Elopomorpha	3.288	1.511	2.4745	1.317	2.3815	1.693	2.3995	1.89575	2.03725	2.11083	0.888152	0.846601	0.703297	5.893	5.252	7.431	0.476832	0.457258	0.34218	14.92	10.825	14.181	0.587	0.536	0.413	0.172021	0.143872	0.157947	0.121922	0.148941	26.1932	25.7468	26.5636	0.666235	0.603177	0.678557	0.955922	1.05732	1.11957	0.97991	0.964489	0.933695	52.35	41.94	164.07	3.4
Polyacanthonotus	challengeri	Actinopterygii	Elopomorpha	1.803	1.5235	2.3985	1.306	2.0465	1.34304	1.66325	1.85225	1.69477	1.73676	0.534797	0.838756	0.754532	3.105	5.889	6.15933	0.653145	0.671604	0.50619	8.981	9.981	7.28944	0.749	0.718	0.56	0.334901	0.289379	0.31214	0.177952	0.278593	26.1932	25.7468	26.5636	0.666235	0.603177	0.678557	1.04073	1.01424	0.844195	0.97991	0.964489	0.933695	39.96	23.58	117.59	2.4
Halosauropsis	macrochir	Actinopterygii	Elopomorpha	3.604	2.009	3.215	2.0235	3.6705	2.48772	2.8065	2.61925	3.07911	2.83495	0.83022	0.777087	0.735282	6.651	10.467	10.631	0.751538	0.859301	0.601023	21.614	23.143	28.27	0.835	0.866	0.64	0.278051	0.428922	0.353487	0.242795	0.325814	26.1932	25.7468	26.5636	0.666235	0.603177	0.678557	0.950212	1.13236	0.985483	0.97991	0.964489	0.933695	39.2	20.32	86.205	3.3
Chimaera	monstrosa	Chondrichthyes	Holocephali	6.56545	4.51205	6.06283	4.44189	6.73866	5.87912	5.53875	5.25236	6.30889	5.7	0.72643	0.680613	0.488712	18.4165	15.0721	26.0872	0.748939	0.840694	0.613647	94.2896	71.2627	120.495	0.832763	0.851703	0.650429	0.388236	0.235213	0.311725	0.180956	0.255176	26.8546	26.5643	27.0749	0.748364	0.731222	0.921247	1.01316	0.842304	0.968127	0.974163	0.964698	0.909436	117.909	59.1769	2309.25	7.9
Squalus	acanthias	Chondrichthyes	Selachii	5.87333	2.35924	6.50164	2.77034	6.47364	4.22182	4.11628	4.63599	5.34773	4.7	0.915777	0.904677	0.758085	15.8279	17.2694	23.9393	0.79555	0.849034	0.776472	47.2026	58.2028	84.8787	0.872634	0.85812	0.781046	0.234646	0.190097	0.212372	0.152053	0.19635	26.8546	26.5643	27.0749	0.748364	0.731222	0.921247	1.08433	1.02858	0.988553	0.974163	0.964698	0.909436	139.419	84.4357	3261.47	9.9
Dipturus	batis	Chondrichthyes	Batoidea	8.77256	3.4013	7.59002	5.0435	7.38928	5.60334	6.08693	6.31676	6.49631	6.3	0.921777	0.747297	0.651898	19.6348	21.7723	24.804	1.17798	1.20175	1.07305	100.293	135.852	129.53	1.1827	1.11762	1.00444	0.421168	0.348522	0.384845	0.301907	0.352565	26.8546	26.5643	27.0749	0.748364	0.731222	0.921247	1.06992	1.12964	0.995799	0.974163	0.964698	0.909436	252.124	92.806	7766.04	8.9
Aetobatus	narinari	Chondrichthyes	Batoidea	4.041	3.3455	5.895	3.076	4.1385	3.511	3.69325	4.4855	3.82475	4.00117	0.560892	0.853069	0.529396	19.0247	20.4236	18.2812	0.353948	0.459503	0.471587	44.957	52.487	46.941	0.466	0.538	0.53	0.16046	0.102354	0.131407	0.148617	0.135709	26.8546	26.5643	27.0749	0.748364	0.731222	0.921247	1.05852	0.921365	1.02832	0.974163	0.964698	0.909436	131.59	85.23	5437	27.5
Hemitrygon	fluviorum	Chondrichthyes	Batoidea	7.2025	4.854	7.473	4.533	5.864	5.626	6.02825	6.003	5.745	5.92542	0.738793	0.79502	0.282004	27.8016	31.0181	24.1523	0.663294	0.630098	0.643618	113.205	105.345	114.267	0.758	0.684	0.675	0.286526	0.159751	0.223138	0.180203	0.212404	26.8546	26.5643	27.0749	0.748364	0.731222	0.921247	1.0307	0.989882	1.1025	0.974163	0.964698	0.909436	202.96	117.96	17201.5	28
Neotrygon	kuhlii	Chondrichthyes	Batoidea	2.5895	2.0725	3.241	1.83231	2.506	2.2145	2.331	2.53666	2.36025	2.4093	0.599536	0.824848	0.46809	11.7299	10.362	9.61416	0.397673	0.410734	0.330505	17.421	18.5589	15.1504	0.51	0.494	0.402	0.097314	0.087092	0.092203	0.0611362	0.0844363	26.8546	26.5643	27.0749	0.748364	0.731222	0.921247	1.03327	0.994771	0.868993	0.974163	0.964698	0.909436	145.8	101.43	896	27.8
Pateobatis	fai	Chondrichthyes	Batoidea	6.9675	4.7775	6.669	5.269	5.813	3.493	5.8725	5.969	4.653	5.49817	0.7279	0.613012	0.799328	27.0315	29.7234	17.1284	0.71112	0.905259	0.77897	121.165	113.651	58.856	0.8	0.901	0.783	0.146574	0.130741	0.138657	0.140531	0.139126	26.8546	26.5643	27.0749	0.748364	0.731222	0.921247	1.15864	1.02952	0.922661	0.974163	0.964698	0.909436	145.09	102.41	8850	26.7
Urolophus	paucimaculatus	Chondrichthyes	Batoidea	2.962	2.089	3.371	1.7795	2.6715	2.18046	2.5255	2.57525	2.42598	2.50891	0.708942	0.849316	0.577777	9.74476	11.7965	9.95164	0.585302	0.321455	0.390856	20.377	19.213	18.6291	0.688	0.41	0.458	0.139867	0.097314	0.11859	0.083469	0.10981	26.8546	26.5643	27.0749	0.748364	0.731222	0.921247	1.04825	1.0195	1.01798	0.974163	0.964698	0.909436	100.53	62.05	355	16.3
Gymnura	micrura	Chondrichthyes	Batoidea	5.772	2.437	4.1705	3.60609	5.627	3.2095	4.1045	3.88829	4.41825	4.13701	0.906498	0.502349	0.821384	20.8664	27.6192	22.2456	0.408781	0.406366	0.390856	42.01	48.1919	60.426	0.521	0.49	0.458	0.108103	0.0951149	0.101609	0.074023	0.0947124	26.8546	26.5643	27.0749	0.748364	0.731222	0.921247	0.950651	1.02	1.06502	0.974163	0.964698	0.909436	280.36	166.49	2795.5	25
Carcharhinus	leucas	Chondrichthyes	Selachii	9.614	4.4565	8.477	5.6455	14.069	8.8835	7.03525	7.06125	11.4763	8.52425	0.886075	0.745971	0.775438	15.7248	31.8207	11.3115	0.995323	0.496919	0.803363	134.859	138.479	443.908	1.038	0.571	0.802	0.370684	0.235858	0.303271	0.182467	0.27307	26.8546	26.5643	27.0749	0.748364	0.731222	0.921247	1.00192	0.921063	1.13057	0.974163	0.964698	0.909436	131.52	102.17	2700	27.5
Carcharhinus	plumbeus	Chondrichthyes	Selachii	7.7285	5.1195	9.247	5.7225	13.674	7.0015	6.424	7.48475	10.3377	8.08217	0.749134	0.78551	0.858967	10.4199	27.6313	31.6189	0.85532	0.68764	0.893319	128.055	183.704	265.893	0.923	0.731	0.871	0.243669	0.164748	0.204209	0.223123	0.208937	26.8546	26.5643	27.0749	0.748364	0.731222	0.921247	1.03021	1.10505	0.884037	0.974163	0.964698	0.909436	106.64	75.49	3407.5	27
Carcharhinus	obscurus	Chondrichthyes	Selachii	10.6015	3.736	8.974	6.355	12.7694	7.05727	7.16875	7.6645	9.91333	8.24886	0.935848	0.706055	0.833399	20.272	44.9628	47.246	0.600724	0.57379	0.843515	128.778	175.479	256.839	0.702	0.637	0.833	0.11135	0.146554	0.128952	0.144471	0.132832	26.8546	26.5643	27.0749	0.748364	0.731222	0.921247	1.03495	0.979431	0.907204	0.974163	0.964698	0.909436	165.93	112.26	7796	12.6
Negaprion	acutidens	Chondrichthyes	Selachii	5.934	3.908	5.63	3.339	7.8025	4.73205	4.921	4.4845	6.26728	5.22426	0.752513	0.805149	0.795099	11.0282	15.2089	29.8464	0.621796	0.418404	0.477316	72.908	48.928	132.776	0.721	0.501	0.535	0.214008	0.155528	0.184768	0.135918	0.172556	26.8546	26.5643	27.0749	0.748364	0.731222	0.921247	1.00074	0.828481	1.14468	0.974163	0.964698	0.909436	259.88	207.94	2715	28.1
Orectolobus	maculatus	Chondrichthyes	Selachii	6.074	3.817	6.6935	4.392	9.825	7.908	4.9455	5.54275	8.8665	6.45158	0.777877	0.754623	0.59343	15.6994	31.1782	30.8652	0.974329	1.13906	1.42596	82.982	89.316	247.653	1.021	1.073	1.253	0.239314	0.141863	0.190588	0.223123	0.198722	26.8546	26.5643	27.0749	0.748364	0.731222	0.921247	1.1393	0.967083	1.0146	0.974163	0.964698	0.909436	161.51	96.9	9090	18
Rhizoprionodon	taylori	Chondrichthyes	Selachii	10.0205	4.7805	9.4845	6.12	19.035	11.7569	7.4005	7.80225	15.3959	10.1996	0.878864	0.76396	0.786456	22.238	34.328	53.3725	0.646398	0.706254	1.14579	151.465	168.535	727.123	0.743	0.746	1.057	0.155528	0.114009	0.134769	0.17646	0.145192	26.8546	26.5643	27.0749	0.748364	0.731222	0.921247	1.00647	0.924218	1.03422	0.974163	0.964698	0.909436	79.54	52.73	661.24	26.6
Chiloscyllium	punctatum	Chondrichthyes	Selachii	3.865	3.29	4.4185	2.627	3.597	2.8435	3.5775	3.52275	3.22025	3.44017	0.524794	0.804062	0.612436	11.739	11.273	14.831	0.335429	0.447188	0.412941	40.617	37.189	32.886	0.447	0.527	0.478	0.0886683	0.0886683	0.0886683	0.0598285	0.0814584	26.8546	26.5643	27.0749	0.748364	0.731222	0.921247	1.01675	1.01983	1.02345	0.974163	0.964698	0.909436	84.48	46.65	1720	28.2
Heterodontus	portusjacksoni	Chondrichthyes	Selachii	6.3515	4.113	6.6795	4.689	7.0355	5.889	5.23225	5.68425	6.46225	5.79292	0.762011	0.712178	0.547141	17.431	27.4743	26.4925	0.76551	1.04647	0.901241	85.344	90.744	129.196	0.847	1.006	0.877	0.169823	0.155528	0.162676	0.133317	0.155336	26.8546	26.5643	27.0749	0.748364	0.731222	0.921247	1.03989	0.92224	0.992573	0.974163	0.964698	0.909436	148.29	68.5	8850	16.8
Glaucostegus	typus	Chondrichthyes	Batoidea	10.4625	5.0815	11.5565	7.07	9.9705	6.64841	7.772	9.31325	8.30946	8.4649	0.874133	0.79103	0.745229	24.51	29.197	31.3078	1.18093	1.16566	0.963824	172.796	277.465	194.221	1.185	1.092	0.924	0.241922	0.260576	0.251249	0.254281	0.252007	26.8546	26.5643	27.0749	0.748364	0.731222	0.921247	1.03456	1.08097	0.932635	0.974163	0.964698	0.909436	320.15	116.78	5030	28
Callorhinchus	milii	Chondrichthyes	Holocephali	5.744	4.746	5.573	5.0205	4.381	3.94536	5.245	5.29675	4.16318	4.90164	0.563298	0.434107	0.43473	16.775	18.554	16.018	0.403724	0.470767	0.304311	92.881	100.735	40.4963	0.516	0.548	0.377	0.199504	0.0967618	0.148133	0.0730617	0.129365	26.8546	26.5643	27.0749	0.748364	0.731222	0.921247	1.08451	1.14603	0.745772	0.974163	0.964698	0.909436	166.15	50.12	3623.58	15.2
Maj_a_B	: Semi-major axis of the anterior bony semicircular canal (taken as equal to the same measurement on the duct)
Min_a_B	: Semi-minor axis of the anterior bony semicircular canal (taken as equal to the same measurement on the duct)
Maj_p_B	: Semi-major axis of the posterior bony semicircular canal (taken as equal to the same measurement on the duct)
Min_p_B	: Semi-minor axis of the posterior bony semicircular canal (taken as equal to the same measurement on the duct)
Maj_l_B	: Semi-major axis of the lateral bony semicircular canal (taken as equal to the same measurement on the duct)
Min_l_B	: Semi-minor axis of the lateral bony semicircular canal (taken as equal to the same measurement on the duct)
R_a_B	: Radius of curvature of the anterior bony semicircular canal
R_p_B	: Radius of curvature of the posterior bony semicircular canal
R_l_B	: Radius of curvature of the lateral bony semicircular canal
e_a_B	: Eccentricity of the anterior bony semicircular canal
e_p_B	: Eccentricity of the posterior bony semicircular canal
e_l_B	: Eccentricity of the lateral bony semicircular canal
LS_a_B	: Length of the slender part of the anterior bony semicircular canal (taken as equal to the same measurement on the duct)
LS_p_B	: Length of the slender part of the posterior bony semicircular canal (taken as equal to the same measurement on the duct)
LS_l_B	: Length of the slender part of the lateral bony semicircular canal (taken as equal to the same measurement on the duct)
rS_a_B	: Average transverse radius of the lumen of the slender part of the anterior bony semicircular canal
rS_p_B	: Average transverse radius of the lumen of the slender part of the posterior bony semicircular canal
rS_l_B	: Average transverse radius of the lumen of the slender part of the lateral bony semicircular canal
ASD_a	: Area enclosed by the central streamline of the anterior semicircular duct
ASD_p	: Area enclosed by the central streamline of the posterior semicircular duct
ASD_l	: Area enclosed by the central streamline of the lateral semicircular duct
dS_a_Out	: Transverse diameter of the slender part of the anterior semicircular duct (including the walls)
dS_p_Out	: Transverse diameter of the slender part of the posterior semicircular duct (including the walls)
dS_l_Out	: Transverse diameter of the slender part of the lateral semicircular duct (including the walls)
aS_a	: Average cross-sectional area of the slender part of the anterior semicircular duct
aS_p	: Average cross-sectional area of the slender part of the posterior semicircular duct
aS_v	: Mean average cross-sectional area of the slender parts of the anterior and posterior semicircular ducts
aS_l	: Average cross-sectional area of the slender part of the lateral semicircular duct
aS	: Mean average cross-sectional area of the slender parts of the anterior, posterior and lateral semicircular ducts
wS_a	: Wall shape drage factor of the slender part of the anterior semicircular duct
wS_p	: Wall shape drage factor of the slender part of the posterior semicircular duct
wS_l	: Wall shape drage factor of the slender part of the lateral semicircular duct
δE:Ra	: Relative deflection factor of the anterior cupula
δE:Rp	: Relative deflection of the posterior cupula
δE:Rl	: Relative deflection of the lateral cupula
e_A_a	: Area error factor of the anterior semicircular canal
e_A_p	: Area error factor of the posterior semicircular canal
e_A_l	: Area error factor of the lateral semicircular canal
t_e_Ls_a	: Slender length error factor of the anterior semicircular canal
t_e_Ls_p	: Slender length error factor of the posterior semicircular canal
t_e_Ls_l	: Slender length error factor of the lateral semicircular canal
CBL	: Condylobasal length
CAOL	: Condylo-anteroorbital length
BM	: Body mass
BT	: Body temperature
TR	: Thermic regime
VR	: Viscosity relative to water
Predicted missing measurements are shown in blue
Caclulated values based on predicted measurements are shown in green
[truncated: 9 more columns]

## Sheet: TMI
Genus	Species	Weighted TMI	TMI_w2_a_BM	TMI_w2_p_BM	TMI_w2_l_BM	TMI_Gv_a_BM	TMI_Gv_p_BM	TMI_Gv_l_BM	TMI_w2_a_CBL	TMI_w2_p_CBL	TMI_w2_l_CBL	TMI_Gv_a_CBL	TMI_Gv_p_CBL	TMI_Gv_l_CBL	TMI_w2_a_CAOL	TMI_w2_p_CAOL	TMI_w2_l_CAOL	TMI_Gv_a_CAOL	TMI_Gv_p_CAOL	TMI_Gv_l_CAOL
Caecilia	tentaculata	-1.27951	-0.90449	-0.804675	-0.716568	-1.52102	-1.09924	-0.972759	-0.992323	-0.892901	-0.796593	-1.5932	-1.1808	-1.03815	-1.01239	-0.9211	-0.818085	-1.6097	-1.20687	-1.05571
Pelodytes	caucasicus	-0.963917	-0.957249	-1.02178	-1.05866	-0.947746	-0.997793	-1.27262	-0.972198	-1.02882	-1.07378	-0.960032	-1.00431	-1.28498	-0.995106	-1.06442	-1.0999	-0.978858	-1.03721	-1.30632
Rana	pipiens	-1.05924	-1.05071	-1.13253	-1.09678	-1.06309	-1.31758	-1.31614	-1.05418	-1.13071	-1.10093	-1.06593	-1.3159	-1.31954	-1.01728	-1.09807	-1.07038	-1.03561	-1.28573	-1.29457
Eleutherodactylus	limbatus	-0.954385	-0.964894	-1.08875	-1.13	-0.91168	-1.1624	-1.42806	-0.990635	-1.10198	-1.15583	-0.932835	-1.17463	-1.44917	-0.98207	-1.1105	-1.15625	-0.925796	-1.18251	-1.4495
Xenopus	laevis	-1.00985	-0.842843	-0.963235	-0.889327	-0.839853	-0.910547	-0.951178	-1.13532	-1.26401	-1.15448	-1.08022	-1.18859	-1.16785	-1.1058	-1.24604	-1.13384	-1.05596	-1.17198	-1.15098
Lissotriton	vulgaris	-1.2644	-1.14123	-1.0695	-1.0821	-1.33693	-1.17519	-1.29576	-1.17636	-1.09605	-1.11575	-1.3658	-1.19974	-1.32326	-1.19082	-1.12509	-1.1353	-1.37768	-1.22658	-1.33923
Proteus	anguinus	-1.24529	-1.18464	-1.16547	-1.14786	-1.32668	-1.25639	-1.22518	-1.16396	-1.13697	-1.13048	-1.30969	-1.23004	-1.21097	-1.13825	-1.11749	-1.11071	-1.28856	-1.21204	-1.19481
Diadectes	sideropelicus	-1.00649	-1.02551	-0.982151	-0.987231	-1.0363	-0.860673	-0.959588	-0.983151	-0.942838	-0.948029	-1.00149	-0.824331	-0.927555	-1.0028	-0.95661	-0.962618	-1.01764	-0.837062	-0.939476
Captorhinus	aguti	-0.985601	-0.96394	-1.02452	-1.05864	-1.00502	-1.01416	-0.942045	-0.963393	-1.02338	-1.05826	-1.00457	-1.01311	-0.941729	-0.952392	-1.0123	-1.04851	-0.995525	-1.00286	-0.933767
Labidosaurus	hamatus	-0.790521	-0.812854	-0.863655	-0.909692	-0.791743	-0.808843	-0.852145	-0.794592	-0.84946	-0.89227	-0.776735	-0.79572	-0.837909	-0.774164	-0.821024	-0.870519	-0.759947	-0.769434	-0.820135
Youngina	capensis	-0.942304	-0.985449	-0.97485	-0.997784	-0.926191	-0.984841	-0.941959	-0.961483	-0.947744	-0.976521	-0.906495	-0.959783	-0.924584	-0.985457	-0.975361	-0.999365	-0.926197	-0.985313	-0.943251
Chelydra	serpentina	-1.1246	-1.15654	-1.10251	-1.20507	-1.00521	-0.91921	-1.1435	-1.25556	-1.20932	-1.2939	-1.08659	-1.01794	-1.21608	-1.15482	-1.09987	-1.20099	-1.0038	-0.916768	-1.14016
Kinosternon	hirpites	-0.886437	-1.08162	-1.11965	-1.18134	-0.734276	-0.901581	-1.05371	-1.06818	-1.10103	-1.17006	-0.723233	-0.88437	-1.04449	-1.00516	-1.0389	-1.1149	-0.671441	-0.826938	-0.999413
Chelonia	mydas	-1.56889	-1.49502	-1.49901	-1.51372	-1.59234	-1.64389	-1.62184	-1.5389	-1.55007	-1.55239	-1.62841	-1.69109	-1.65344	-1.49154	-1.49402	-1.50656	-1.58949	-1.63927	-1.61599
Sacalia	quadriocellata	-1.07727	-1.10826	-1.08169	-1.15818	-0.974693	-0.917676	-1.05065	-1.18883	-1.16314	-1.23149	-1.04091	-0.992969	-1.11055	-1.11018	-1.08444	-1.16209	-0.976271	-0.920212	-1.05384
Graptemys	sp.	-1.10981	-1.1459	-1.11666	-1.187	-0.950226	-0.965639	-1.07118	-1.27089	-1.24342	-1.30066	-1.05295	-1.08282	-1.16406	-1.21533	-1.19198	-1.25357	-1.00729	-1.03526	-1.12558
Trachemys	scripta	-1.2218	-1.2471	-1.23495	-1.28879	-1.09781	-1.14858	-1.35128	-1.34001	-1.33278	-1.3726	-1.17417	-1.23902	-1.41976	-1.33944	-1.33367	-1.37278	-1.17371	-1.23984	-1.4199
Prolacerta	broomi	-1.05255	-1.09091	-1.10145	-1.10089	-1.05526	-1.20878	-1.0533	-1.04859	-1.05558	-1.06296	-1.02048	-1.16638	-1.02231	-1.09797	-1.1094	-1.10859	-1.06106	-1.21613	-1.05959
Alligator	mississipiensis	-1.05577	-1.07605	-1.0992	-0.882061	-1.13459	-1.1969	-0.991826	-0.971805	-0.993669	-0.78724	-1.04892	-1.09935	-0.914344	-1.08518	-1.10812	-0.887743	-1.1421	-1.20516	-0.996469
Caiman	crocodilus	-0.654832	-0.809111	-0.800247	-0.748483	-0.537541	-0.647162	-0.6468	-0.778055	-0.770008	-0.720006	-0.512018	-0.619208	-0.623531	-0.873806	-0.868969	-0.805958	-0.590709	-0.71069	-0.693765
Tomistoma	schlegelii	-0.983645	-1.0636	-1.08231	-0.945289	-1.07861	-1.10673	-1.03523	-0.896674	-0.915448	-0.793054	-0.94143	-0.952477	-0.910836	-1.0059	-1.01865	-0.886585	-1.0312	-1.04788	-0.987264
Gavialis	gangeticus	-0.831388	-1.01374	-1.1954	-0.973853	-0.827721	-1.22727	-0.92347	-0.83876	-1.0194	-0.814473	-0.683918	-1.06458	-0.793234	-1.00494	-1.18426	-0.960431	-0.820492	-1.21697	-0.912502
Crocodylus	johnstoni	-0.780256	-0.897806	-0.963263	-0.754377	-0.764865	-0.868802	-0.66506	-0.797457	-0.859354	-0.663535	-0.682395	-0.772747	-0.59083	-0.927245	-0.994533	-0.780524	-0.789059	-0.897709	-0.686426
Crocodylus	niloticus	-0.925766	-1.02818	-1.13627	-1.01422	-0.958917	-1.19274	-1.06517	-0.895688	-1.00506	-0.893158	-0.850032	-1.07145	-0.966247	-1.00061	-1.10495	-0.98336	-0.936264	-1.16379	-1.03995
Crocodylus	moreletii	-0.759119	-0.933686	-1.05914	-0.913378	-0.737414	-0.982656	-0.850767	-0.793751	-0.917335	-0.786115	-0.62241	-0.851573	-0.746775	-0.890243	-1.01151	-0.870141	-0.701711	-0.938627	-0.815436
Crocodylus	intermedius	-0.707091	-0.906238	-1.0184	-0.814664	-0.738191	-0.942532	-0.667172	-0.690699	-0.799647	-0.618708	-0.561053	-0.74031	-0.507049	-0.84877	-0.95524	-0.756975	-0.690962	-0.884142	-0.620032
Crocodylus	acutus	-0.925988	-0.976192	-1.07933	-0.883073	-0.942206	-1.14125	-0.890232	-0.906243	-1.01422	-0.81837	-0.884719	-1.08106	-0.837361	-0.983665	-1.08536	-0.883729	-0.948348	-1.14683	-0.890768
Struthio	camelus	-0.273959	-0.357673	-0.49972	-0.542525	-0.125228	-0.252668	-0.427731	-0.413126	-0.564136	-0.591406	-0.170802	-0.312215	-0.467673	-0.473489	-0.622153	-0.643553	-0.22041	-0.365847	-0.510285
Apteryx	haastii	-0.259379	-0.434232	-0.449022	-0.495333	-0.238226	-0.199727	-0.386385	-0.278926	-0.287685	-0.354838	-0.110589	-0.0505853	-0.271581	-0.524052	-0.544935	-0.576697	-0.312043	-0.288391	-0.452871
Dromaius	novaehollandiae	-0.406773	-0.509756	-0.589106	-0.552064	-0.278618	-0.461307	-0.424169	-0.534767	-0.620072	-0.57375	-0.299173	-0.489933	-0.44189	-0.573788	-0.656488	-0.606953	-0.331242	-0.523597	-0.469021
Casuarius	casuarius	-0.40082	-0.586474	-0.672985	-0.625089	-0.242635	-0.470896	-0.417928	-0.571229	-0.662077	-0.610368	-0.230106	-0.460813	-0.4059	-0.610728	-0.697718	-0.643408	-0.262567	-0.49376	-0.432898
Rhynchotus	rufescens	-0.388511	-0.548735	-0.614782	-0.656741	-0.275726	-0.352213	-0.451383	-0.505099	-0.568396	-0.617466	-0.239864	-0.309334	-0.419289	-0.613901	-0.684744	-0.71695	-0.329281	-0.416888	-0.500581
Meleagris	gallopavo	-0.28469	-0.404125	-0.434567	-0.482351	-0.123828	-0.260295	-0.355486	-0.451562	-0.487081	-0.524653	-0.162813	-0.30884	-0.390053	-0.457581	-0.491091	-0.529025	-0.16776	-0.312547	-0.393626
Gallus	gallus	-0.248037	-0.491834	-0.486429	-0.571426	-0.123047	-0.161518	-0.378972	-0.404974	-0.394875	-0.493099	-0.0516625	-0.0768842	-0.314969	-0.42778	-0.41802	-0.513372	-0.0704048	-0.0982803	-0.331535
Lophura	diardi	-0.373391	-0.527414	-0.55016	-0.603953	-0.279841	-0.303443	-0.492787	-0.485855	-0.506282	-0.566489	-0.245686	-0.262881	-0.462174	-0.496251	-0.516895	-0.57576	-0.25423	-0.272692	-0.46975
Phasianus	colchicus	-0.287946	-0.456729	-0.456743	-0.53383	-0.207804	-0.180759	-0.396655	-0.392991	-0.389367	-0.47639	-0.155421	-0.118475	-0.349718	-0.395232	-0.391072	-0.478117	-0.157263	-0.120052	-0.351129
Coturnix	coturnix	-0.378495	-0.547267	-0.514197	-0.603089	-0.357083	-0.240005	-0.46662	-0.428951	-0.386424	-0.496973	-0.259846	-0.121889	-0.379909	-0.449657	-0.410675	-0.516889	-0.276863	-0.144307	-0.396183
Cygnus	olor	-0.495245	-0.622491	-0.640847	-0.668621	-0.474807	-0.534805	-0.709972	-0.515311	-0.531684	-0.57125	-0.386722	-0.433893	-0.630407	-0.675343	-0.696722	-0.714736	-0.518243	-0.586457	-0.747655
Anas	undulata	-0.319205	-0.510179	-0.616627	-0.542317	-0.30159	-0.423176	-0.441182	-0.356686	-0.455339	-0.403807	-0.175443	-0.274078	-0.328	-0.439008	-0.540611	-0.477793	-0.243098	-0.352905	-0.388457
Tachyeres	brachypterus	-0.428038	-0.590909	-0.589487	-0.578877	-0.379947	-0.319995	-0.47078	-0.490888	-0.486054	-0.488305	-0.297746	-0.22438	-0.39677	-0.586957	-0.58497	-0.574368	-0.376699	-0.315819	-0.467095
Aythya	fuligula	-0.336271	-0.534755	-0.532823	-0.554777	-0.272476	-0.302182	-0.496527	-0.416261	-0.408095	-0.447892	-0.175094	-0.186881	-0.409187	-0.533114	-0.531267	-0.553905	-0.271128	-0.300743	-0.495815
Apus	apus	-0.648286	-0.871322	-0.927438	-0.87201	-0.479513	-0.628638	-0.64771	-0.840894	-0.890454	-0.845498	-0.454507	-0.594449	-0.626045	-0.853298	-0.909407	-0.859492	-0.4647	-0.61197	-0.637481
Selasphorus	rufus	-0.242905	-0.588565	-0.613755	-0.605986	-0.177884	-0.220064	-0.367474	-0.334393	-0.338591	-0.378152	0.0310039	0.0343019	-0.181301	-0.576887	-0.603552	-0.602513	-0.168286	-0.210632	-0.364635
Thalurania	furcata	-0.0327771	-0.462229	-0.488966	-0.536066	0.120592	0.0692934	-0.214908	-0.222582	-0.229349	-0.321285	0.317542	0.309287	-0.0394029	-0.451722	-0.479929	-0.533389	0.129227	0.0776467	-0.212721
Steatornis	caripensis	-0.46011	-0.708363	-0.775955	-0.763424	-0.321494	-0.519235	-0.701855	-0.62779	-0.689889	-0.69098	-0.255276	-0.439674	-0.642658	-0.646387	-0.710038	-0.708107	-0.27056	-0.4583	-0.656653
Podargus	strigoides	-0.425168	-0.769009	-0.796812	-0.750523	-0.28556	-0.405029	-0.468609	-0.61237	-0.630691	-0.609463	-0.156829	-0.251464	-0.353344	-0.641891	-0.66127	-0.635995	-0.181091	-0.279732	-0.375024
Caprimulgus	europaeus	-0.734506	-0.894472	-0.861286	-0.895533	-0.699903	-0.680847	-0.821239	-0.787969	-0.745166	-0.800222	-0.612375	-0.573505	-0.743356	-0.858019	-0.82342	-0.865833	-0.669945	-0.645844	-0.79697
Columba	palumbus	-0.546741	-0.644365	-0.683288	-0.706092	-0.499577	-0.493332	-0.603036	-0.599479	-0.634572	-0.66588	-0.462688	-0.448298	-0.570177	-0.659619	-0.700059	-0.721418	-0.512113	-0.508835	-0.61556
Cuculus	canorus	-0.546164	-0.791236	-0.894591	-0.852325	-0.426561	-0.622407	-0.672219	-0.688821	-0.783434	-0.760576	-0.342393	-0.519651	-0.597247	-0.754566	-0.856324	-0.821896	-0.396425	-0.587032	-0.647354
Grus	grus	-0.27498	-0.560515	-0.540309	-0.562202	-0.172665	-0.217507	-0.444509	-0.402232	-0.376652	-0.418869	-0.0425827	-0.06622	-0.327386	-0.55478	-0.533712	-0.555523	-0.167952	-0.211408	-0.439051
Spheniscus	demersus	-0.449478	-0.68545	-0.735718	-0.701148	-0.324315	-0.513392	-0.659789	-0.596209	-0.643326	-0.620359	-0.250974	-0.427983	-0.593773	-0.666529	-0.715231	-0.683122	-0.308766	-0.494453	-0.645059
Pelagodroma	marina	-0.19517	-0.523712	-0.584681	-0.555266	-0.0586546	-0.25499	-0.4482	-0.382572	-0.432135	-0.428704	0.0573392	-0.113974	-0.344781	-0.354118	-0.404304	-0.403898	0.0807238	-0.088247	-0.324511
Diomedea	exulans	-0.695193	-0.982775	-1.01207	-0.938321	-0.653941	-0.814958	-0.96536	-0.76413	-0.7859	-0.740348	-0.474252	-0.605879	-0.803588	-0.920019	-0.944273	-0.879003	-0.602367	-0.752281	-0.916889
Fulmarus	glacialis	-0.41071	-0.71602	-0.808874	-0.732202	-0.298131	-0.600357	-0.62956	-0.550923	-0.635017	-0.583293	-0.162449	-0.439641	-0.507881	-0.664966	-0.754506	-0.686422	-0.256174	-0.550099	-0.592151
Gavia	immer	-0.380441	-0.663479	-0.678267	-0.690224	-0.294383	-0.379958	-0.538796	-0.497076	-0.505563	-0.53966	-0.157627	-0.220307	-0.415765	-0.603931	-0.614185	-0.634732	-0.245444	-0.320719	-0.493452
Ardea	cinerea	-0.670269	-0.916689	-0.971872	-0.905074	-0.788578	-0.882819	-1.00934	-0.574456	-0.612913	-0.596127	-0.507318	-0.550991	-0.756891	-0.809239	-0.857085	-0.807589	-0.700271	-0.776708	-0.929684
Phalacrocorax	harrisi	-0.425602	-0.655447	-0.631348	-0.665926	-0.377127	-0.343841	-0.497564	-0.498949	-0.469138	-0.524284	-0.248511	-0.193892	-0.381823	-0.613323	-0.58589	-0.626273	-0.342508	-0.301819	-0.465162
Fregata	magnificens	-0.291427	-0.688373	-0.732729	-0.718756	-0.184851	-0.348109	-0.488956	-0.435071	-0.467828	-0.489944	0.023321	-0.10323	-0.301985	-0.630254	-0.670503	-0.665593	-0.137087	-0.290586	-0.445515
Phaethon	lepturus	-0.552733	-0.858034	-0.849647	-0.831388	-0.506552	-0.620147	-0.665356	-0.638552	-0.617721	-0.633577	-0.326173	-0.40575	-0.503717	-0.736057	-0.719631	-0.721633	-0.406307	-0.499958	-0.575671
Balaeniceps	rex	-0.825866	-1.02332	-1.04335	-0.989629	-0.885915	-0.95701	-0.96537	-0.787422	-0.798742	-0.77614	-0.692043	-0.730891	-0.790919	-0.932216	-0.945286	-0.904667	-0.81104	-0.866359	-0.895944
Ciconia	ciconia	-0.407572	-0.689015	-0.712542	-0.674271	-0.323907	-0.455742	-0.664905	-0.500426	-0.517773	-0.503452	-0.168918	-0.275695	-0.525322	-0.763216	-0.791394	-0.740289	-0.384889	-0.528635	-0.718851
Ciconia	nigra	-0.474179	-0.772531	-0.765939	-0.737424	-0.458026	-0.502121	-0.574122	-0.50631	-0.488497	-0.496759	-0.239236	-0.245649	-0.377466	-0.796092	-0.790934	-0.758254	-0.47739	-0.525227	-0.591143
Phoenicopterus	ruber	-0.302368	-0.586811	-0.635042	-0.621617	-0.205552	-0.430961	-0.578479	-0.417962	-0.459604	-0.468877	-0.0667861	-0.268783	-0.453669	-0.591097	-0.639355	-0.624671	-0.209075	-0.434947	-0.580974
Podiceps	cristatus	-0.466304	-0.694655	-0.725235	-0.663567	-0.412233	-0.515629	-0.563466	-0.53787	-0.56008	-0.522164	-0.283381	-0.362957	-0.44792	-0.683699	-0.713798	-0.654467	-0.403228	-0.505057	-0.55603
Haematopus	ostralegus	-0.321702	-0.659264	-0.67826	-0.697341	-0.201921	-0.346227	-0.546398	-0.462401	-0.470748	-0.51982	-0.0401321	-0.1544	-0.401339	-0.692198	-0.71393	-0.728747	-0.228988	-0.379201	-0.572061
Scolopax	rusticola	-0.444387	-0.76914	-0.7616	-0.751179	-0.354721	-0.464862	-0.57052	-0.544523	-0.524652	-0.548663	-0.170123	-0.245825	-0.405036	-0.862089	-0.861632	-0.837815	-0.43111	-0.557334	-0.641314
Actitis	hypoleucos	-0.381378	-0.667906	-0.643078	-0.662604	-0.320142	-0.266958	-0.432263	-0.471348	-0.431912	-0.486106	-0.158603	-0.0717533	-0.28804	-0.632054	-0.606069	-0.634125	-0.290677	-0.232747	-0.408991
Alca	torda	-0.267963	-0.62486	-0.654591	-0.618174	-0.104553	-0.278276	-0.400617	-0.46895	-0.490096	-0.477609	0.0235802	-0.126214	-0.285756	-0.571996	-0.598343	-0.570923	-0.0611066	-0.22628	-0.362007
Gelochelidon	nilotica	-0.33503	-0.653817	-0.654873	-0.669676	-0.237617	-0.337081	-0.604129	-0.464512	-0.454317	-0.499159	-0.0820395	-0.151684	-0.464794	-0.605165	-0.603417	-0.627157	-0.197634	-0.289514	-0.569385
Creagrus	furcatus	-0.538455	-0.831816	-0.813889	-0.82915	-0.463792	-0.571691	-0.750747	-0.645337	-0.61759	-0.660941	-0.310537	-0.39023	-0.613297	-0.765318	-0.743004	-0.769301	-0.409142	-0.506164	-0.701842
Larus	argentatus	-0.240413	-0.598053	-0.655916	-0.66442	-0.100609	-0.37823	-0.591907	-0.41459	-0.463591	-0.498782	0.0501672	-0.200442	-0.456558	-0.540657	-0.594576	-0.612269	-0.053439	-0.321527	-0.549292
Opisthocomus	hoazin	-0.534229	-0.683771	-0.716117	-0.74174	-0.429513	-0.582797	-0.712853	-0.654934	-0.684685	-0.71593	-0.405814	-0.553741	-0.691764	-0.661814	-0.692918	-0.72263	-0.411468	-0.561352	-0.697238
Athene	cunicularia	-0.569769	-0.846087	-0.908185	-0.883906	-0.442829	-0.554554	-0.728816	-0.739095	-0.792691	-0.787938	-0.354899	-0.44779	-0.650396	-0.71374	-0.76736	-0.765585	-0.334061	-0.424374	-0.632131
Tyto	alba	-0.582283	-0.797768	-0.764495	-0.743239	-0.535711	-0.428479	-0.612313	-0.657148	-0.614891	-0.616694	-0.420144	-0.290183	-0.508908	-0.737554	-0.700648	-0.690109	-0.486225	-0.369458	-0.568898
Alcedo	atthis	-0.432007	-0.742628	-0.804613	-0.771103	-0.441393	-0.511216	-0.641036	-0.453234	-0.496368	-0.510744	-0.203558	-0.22627	-0.428286	-0.651718	-0.70865	-0.692245	-0.366679	-0.422507	-0.576597
Coracias	garrulus	-0.552333	-0.807522	-0.82103	-0.807372	-0.504241	-0.474673	-0.586834	-0.630545	-0.63245	-0.648165	-0.358794	-0.300347	-0.456739	-0.736562	-0.745912	-0.745145	-0.445923	-0.405233	-0.535986
Ramphastos	dicolorus	-0.368163	-0.718726	-0.708141	-0.724715	-0.342921	-0.352356	-0.510916	-0.427188	-0.40087	-0.461813	-0.103325	-0.0683103	-0.296088	-0.653809	-0.639222	-0.667167	-0.28957	-0.288646	-0.463891
Pteroglossus	bailloni	-0.42451	-0.735365	-0.792942	-0.756425	-0.378835	-0.507555	-0.550233	-0.496061	-0.538972	-0.540955	-0.182165	-0.272781	-0.374165	-0.692523	-0.747983	-0.720091	-0.343625	-0.465994	-0.520543
Dendrocopos	medius	-0.331456	-0.629144	-0.735695	-0.739938	-0.171862	-0.32577	-0.434736	-0.514379	-0.610857	-0.637177	-0.0775436	-0.210368	-0.350766	-0.629621	-0.73739	-0.744087	-0.172254	-0.327337	-0.438126
Sagittarius	serpentarius	-0.426747	-0.636704	-0.696901	-0.670351	-0.333209	-0.510479	-0.588136	-0.550178	-0.607505	-0.591984	-0.262099	-0.427841	-0.5241	-0.539331	-0.592372	-0.580418	-0.253185	-0.413851	-0.514649
Pandion	haliaetus	-0.647648	-0.864675	-0.875025	-0.818209	-0.489199	-0.561086	-0.599071	-0.836495	-0.845478	-0.792769	-0.46604	-0.533772	-0.578282	-0.812427	-0.8191	-0.770463	-0.44626	-0.509388	-0.560056
Circus	cyaneus	-0.550297	-0.784485	-0.761594	-0.771912	-0.431852	-0.450692	-0.526669	-0.706043	-0.6778	-0.701386	-0.367385	-0.373231	-0.469039	-0.686986	-0.657631	-0.684059	-0.351724	-0.354587	-0.454881
Aquila	chrysaetos	-0.9756	-1.11118	-1.11715	-1.02445	-0.93818	-0.943519	-0.948972	-1.03748	-1.04173	-0.957561	-0.877612	-0.8738	-0.894317	-1.02447	-1.02389	-0.943837	-0.866918	-0.857316	-0.883103
Buteo	buteo	-0.878997	-1.0445	-1.05835	-0.962325	-0.817259	-0.792307	-0.767264	-0.968506	-0.977982	-0.893851	-0.754808	-0.718017	-0.711312	-0.959778	-0.967857	-0.885501	-0.747635	-0.708656	-0.704488
Vultur	gryphus	-0.657249	-0.861998	-0.821928	-0.812435	-0.565195	-0.594986	-0.763013	-0.773174	-0.731941	-0.731651	-0.492196	-0.5118	-0.697001	-0.831989	-0.789084	-0.782748	-0.540532	-0.564625	-0.738755
Falco	subbuteo	-0.748382	-1.04182	-1.06775	-1.0628	-0.558221	-0.683738	-0.899441	-0.979237	-0.999379	-1.00682	-0.50679	-0.620537	-0.853699	-0.95699	-0.977638	-0.987433	-0.488507	-0.600439	-0.837858
Melopsittacus	undulatus	-0.334467	-0.547229	-0.582065	-0.538458	-0.181114	-0.325425	-0.293996	-0.511226	-0.538305	-0.507088	-0.151526	-0.284973	-0.268362	-0.52561	-0.560417	-0.523379	-0.163347	-0.305414	-0.281674
Ara	macao	-0.613423	-0.737394	-0.771222	-0.730658	-0.629411	-0.610932	-0.739219	-0.624708	-0.652683	-0.628997	-0.536802	-0.501353	-0.656148	-0.601759	-0.626161	-0.60709	-0.517941	-0.476836	-0.638246
Psittacus	erithacus	-0.351505	-0.614138	-0.673824	-0.654348	-0.203363	-0.30447	-0.413207	-0.532643	-0.586512	-0.581125	-0.136388	-0.223758	-0.353374	-0.546759	-0.602191	-0.594305	-0.147989	-0.238252	-0.364144
Dicrurus	paradiseus	-0.38916	-0.710516	-0.762565	-0.795506	-0.28092	-0.455078	-0.605515	-0.541581	-0.581678	-0.643697	-0.142083	-0.287864	-0.481467	-0.571642	-0.614902	-0.671686	-0.166788	-0.318576	-0.504338
Corvus	corax	-0.419899	-0.740275	-0.826421	-0.754264	-0.286706	-0.579476	-0.42996	-0.586719	-0.665461	-0.615623	-0.160508	-0.430682	-0.316672	-0.666382	-0.747394	-0.686946	-0.225978	-0.506422	-0.374953
Taeniopygia	guttata	-0.233727	-0.523873	-0.585286	-0.569086	-0.0231775	-0.212501	-0.251157	-0.477631	-0.529198	-0.528772	0.0148262	-0.160652	-0.218215	-0.482022	-0.542372	-0.536741	0.0112172	-0.17283	-0.224726
Passer	domesticus	-0.294159	-0.541864	-0.647449	-0.618282	-0.18366	-0.334924	-0.39584	-0.43234	-0.526454	-0.520564	-0.0936495	-0.223074	-0.315991	-0.475859	-0.578361	-0.56286	-0.129415	-0.271058	-0.350553
Carduelis	chloris	-0.325806	-0.583751	-0.66834	-0.627925	-0.182369	-0.49822	-0.502654	-0.496323	-0.570894	-0.550083	-0.110517	-0.40814	-0.439046	-0.528123	-0.610254	-0.581656	-0.136652	-0.444524	-0.464846
Bangsia	arcaei	-0.404944	-0.65314	-0.692192	-0.648087	-0.2613	-0.447743	-0.406165	-0.578079	-0.608074	-0.581343	-0.199612	-0.369983	-0.351626	-0.59806	-0.634597	-0.602016	-0.216033	-0.3945	-0.368519
Hirundo	rustica	-0.403268	-0.67522	-0.70434	-0.67846	-0.302622	-0.503624	-0.418963	-0.536345	-0.552237	-0.554307	-0.188489	-0.363018	-0.317513	-0.593709	-0.618751	-0.60917	-0.235633	-0.424504	-0.362343
Regulus	regulus	-0.260377	-0.572496	-0.605812	-0.6093	-0.123577	-0.382023	-0.346129	-0.429404	-0.447619	-0.481655	-0.00597875	-0.235787	-0.241825	-0.516095	-0.547523	-0.564279	-0.0772246	-0.328139	-0.309341
Luscinia	megarhynchos	-0.375099	-0.682816	-0.739749	-0.749624	-0.229115	-0.469114	-0.509162	-0.553507	-0.597928	-0.634061	-0.122844	-0.338012	-0.41473	-0.623933	-0.678322	-0.700826	-0.180723	-0.412329	-0.469287
Turdus	merula	-0.509985	-0.738581	-0.801282	-0.77023	-0.420365	-0.574139	-0.509653	-0.620577	-0.673656	-0.664431	-0.323385	-0.45616	-0.4232	-0.707676	-0.769228	-0.745204	-0.394966	-0.544508	-0.489203
Sphenodon	punctatus	-0.986606	-1.02884	-0.968808	-1.04699	-0.962801	-0.823253	-0.973108	-1.02642	-0.964349	-1.04517	-0.96081	-0.81913	-0.971616	-0.972131	-0.908561	-0.996587	-0.916197	-0.767559	-0.931919
Delma	borea	-0.439426	-0.468169	-0.531798	-0.590996	-0.331393	-0.437019	-0.623299	-0.539842	-0.598021	-0.657387	-0.390296	-0.498236	-0.677549	-0.549298	-0.620811	-0.671945	-0.398067	-0.519304	-0.689445
Nephrurus	levis	-0.885325	-0.971127	-1.02348	-0.92848	-0.909017	-1.13982	-0.996749	-0.876463	-0.916902	-0.844397	-0.831219	-1.0413	-0.928042	-0.87429	-0.921655	-0.84571	-0.829433	-1.04569	-0.929114
Hemitheconyx	caudicinctus	-0.885526	-0.989637	-1.03755	-1.00109	-0.857892	-0.993067	-0.994193	-0.929196	-0.968872	-0.947523	-0.808219	-0.929577	-0.950423	-0.919809	-0.964129	-0.941409	-0.800504	-0.925192	-0.945426
Eublepharis	macularius	-0.891442	-0.889275	-0.84695	-0.831255	-0.887087	-0.804099	-0.882869	-0.899268	-0.852388	-0.841228	-0.8953	-0.809126	-0.891018	-0.883722	-0.842236	-0.830031	-0.882523	-0.799741	-0.881869
Teratoscincus	przewalskii	-0.836719	-0.960438	-0.990124	-0.930478	-0.798527	-0.899225	-0.869419	-0.894853	-0.914745	-0.872514	-0.744626	-0.829543	-0.822055	-0.884877	-0.910885	-0.866567	-0.736428	-0.825975	-0.817195
Ptyodactylus	hasselquistii	-0.599072	-0.809472	-0.899975	-0.827003	-0.501752	-0.795856	-0.873298	-0.72017	-0.798749	-0.747813	-0.428361	-0.702281	-0.808588	-0.739866	-0.82737	-0.769347	-0.444548	-0.728739	-0.826184
Gekko	gecko	-0.800727	-0.981079	-0.998807	-0.96001	-0.799267	-0.897995	-0.880711	-0.837925	-0.844183	-0.831623	-0.681618	-0.755058	-0.775801	-0.812936	-0.819976	-0.809946	-0.661081	-0.73268	-0.758088
Gymnodactylus	geckoides	-0.691647	-0.838036	-0.884761	-0.856506	-0.632044	-0.786571	-0.902742	-0.770336	-0.803931	-0.797243	-0.576406	-0.71185	-0.854316	-0.776822	-0.821681	-0.808217	-0.581737	-0.728259	-0.863283
Smaug	warreni mossambicus	-0.823941	-0.919281	-0.936971	-0.950805	-0.798036	-0.826253	-0.886336	-0.865865	-0.875616	-0.90359	-0.754137	-0.769535	-0.847755	-0.858537	-0.87328	-0.899454	-0.748114	-0.767375	-0.844375
Lepidophyma	smithii	-0.78107	-0.8058	-0.844954	-0.775826	-0.756577	-0.763356	-0.579904	-0.808078	-0.840999	-0.77908	-0.75845	-0.7597	-0.582562	-0.804659	-0.845288	-0.779659	-0.75564	-0.763666	-0.583035
Cricosaura	typica	-0.526185	-0.629065	-0.746916	-0.736087	-0.437605	-0.678282	-0.709984	-0.619225	-0.725669	-0.729265	-0.429519	-0.658641	-0.70441	-0.635174	-0.756149	-0.750108	-0.442626	-0.686817	-0.721441
Tribolonotus	gracilis	-0.761337	-0.95292	-1.07985	-0.981387	-0.724131	-1.01661	-0.952476	-0.826619	-0.940941	-0.868585	-0.620333	-0.888194	-0.860301	-0.818318	-0.937405	-0.863485	-0.613511	-0.884925	-0.856133
Tiliqua	rugosa	-0.91851	-0.953332	-1.02502	-1.05224	-0.867663	-1.01175	-1.14447	-0.960611	-1.03117	-1.05909	-0.873645	-1.01744	-1.15007	-1.01755	-1.09414	-1.11213	-0.920441	-1.07565	-1.19341
Eumeces	schneideri	-0.68434	-0.778546	-0.883723	-0.804078	-0.621225	-0.834663	-0.830868	-0.751221	-0.850681	-0.780237	-0.598768	-0.804118	-0.811387	-0.782583	-0.889143	-0.81121	-0.624542	-0.839673	-0.836696
Feylinia	polylepis	-0.72644	-0.723141	-0.774597	-0.888336	-0.614883	-0.677422	-0.885566	-0.819449	-0.867854	-0.976741	-0.694033	-0.763629	-0.957805	-0.867543	-0.931048	-1.0262	-0.733558	-0.822047	-0.998221
Chalcides	ocellatus	-0.476738	-0.64081	-0.682582	-0.692953	-0.36386	-0.559943	-0.639631	-0.608264	-0.642211	-0.664748	-0.337112	-0.522623	-0.616584	-0.606091	-0.646963	-0.666061	-0.335327	-0.527016	-0.617656
Tupinambis	teguixin	-0.627181	-0.76988	-0.805223	-0.868275	-0.538244	-0.705964	-0.836766	-0.734251	-0.767506	-0.836177	-0.508963	-0.671097	-0.810538	-0.721545	-0.753581	-0.824401	-0.498521	-0.658225	-0.800915
Salvator	merianae	-0.997137	-1.02717	-0.981418	-1.01763	-0.989625	-0.945058	-1.1647	-1.01055	-0.963585	-1.00271	-0.975971	-0.928572	-1.1525	-1.01506	-0.968569	-1.00691	-0.979676	-0.933179	-1.15594
Diplometopon	zarudnyi	-0.525243	-0.576623	-0.64963	-0.688353	-0.338964	-0.600494	-0.538341	-0.700223	-0.770606	-0.801566	-0.440544	-0.712326	-0.630852	-0.706759	-0.791007	-0.813796	-0.445915	-0.731185	-0.640845
Bipes	biporus	-0.642639	-0.57081	-0.63582	-0.699719	-0.557031	-0.762259	-0.809962	-0.705188	-0.767614	-0.822754	-0.667468	-0.884092	-0.910498	-0.692692	-0.76847	-0.817958	-0.657198	-0.884883	-0.90658
Lacerta	viridis	-0.750155	-0.833724	-0.848667	-0.841571	-0.744301	-0.791603	-0.748796	-0.770923	-0.775978	-0.786164	-0.692689	-0.724408	-0.703521	-0.767108	-0.77906	-0.786015	-0.689553	-0.727257	-0.703399
Podarcis	wagleriana	-0.646641	-0.758285	-0.780154	-0.796854	-0.668073	-0.74862	-0.885115	-0.647191	-0.655523	-0.698095	-0.576773	-0.633409	-0.804415	-0.641354	-0.657026	-0.696369	-0.571976	-0.634799	-0.803005
Podarcis	siculus	-0.690831	-0.78734	-0.809554	-0.749471	-0.712159	-0.734037	-0.586673	-0.687896	-0.697493	-0.661162	-0.630433	-0.630446	-0.514512	-0.695825	-0.713546	-0.671944	-0.636949	-0.645285	-0.523322
Typhlops	jamaicensis	-1.00141	-0.698119	-0.688976	-0.566786	-1.09007	-1.0617	-0.846994	-0.864801	-0.855546	-0.718813	-1.22705	-1.21568	-0.971221	-0.859911	-0.864115	-0.720776	-1.22303	-1.2236	-0.972825
Tropidophis	haetianus	-0.973685	-0.877436	-0.906757	-0.681329	-0.937227	-1.15598	-0.774873	-0.98699	-1.01639	-0.781222	-1.02726	-1.25733	-0.8565	-0.986783	-1.02505	-0.785175	-1.02709	-1.26533	-0.85973
Boa	constrictor	-0.852435	-0.84701	-0.867475	-0.805357	-0.802671	-0.925066	-1.01315	-0.897801	-0.921811	-0.851007	-0.844413	-0.975296	-1.05046	-0.880492	-0.903026	-0.835051	-0.830188	-0.95793	-1.03742
Uropeltis	melanogaster	-0.550762	-0.593993	-0.666363	-0.740079	-0.536085	-0.766384	-0.923746	-0.565461	-0.628018	-0.715909	-0.512637	-0.730937	-0.903997	-0.58104	-0.654583	-0.734774	-0.52544	-0.755495	-0.919411
Anomochilus	leonardi	-0.841467	-0.688476	-0.736137	-0.662192	-0.803474	-0.965609	-0.984071	-0.846945	-0.893462	-0.806925	-0.933709	-1.11104	-1.10234	-0.83215	-0.892036	-0.800109	-0.92155	-1.10972	-1.09677
Cylindrophis	ruffus	-0.530082	-0.551865	-0.584425	-0.76148	-0.351248	-0.490715	-0.850304	-0.700538	-0.737713	-0.896194	-0.473433	-0.632417	-0.960384	-0.660493	-0.701276	-0.862556	-0.440523	-0.598734	-0.932897
Casarea	dussumieri	-1.07536	-0.913141	-0.907858	-0.768147	-1.09605	-1.17522	-1.07274	-1.02492	-1.0198	-0.87005	-1.18791	-1.27869	-1.15601	-1.03142	-1.03572	-0.880183	-1.19326	-1.29342	-1.16429
Xenopeltis	unicolor	-0.606193	-0.722628	-0.750735	-0.856755	-0.33852	-0.537522	-0.637186	-0.870091	-0.903782	-0.990182	-0.45971	-0.679002	-0.746214	-0.873407	-0.912466	-0.99561	-0.462435	-0.687029	-0.750649
Morelia	spilota	-0.945164	-0.903673	-0.903178	-0.859308	-0.902471	-1.05994	-1.07423	-0.97492	-0.977737	-0.923657	-0.961025	-1.12886	-1.12681	-0.975091	-0.979635	-0.924613	-0.961165	-1.13062	-1.1276
Python	molurus	-0.890883	-0.778468	-0.796867	-0.806139	-0.799732	-0.926492	-1.06721	-0.954637	-0.985393	-0.964466	-0.944514	-1.10077	-1.19658	-0.930888	-0.959015	-0.942293	-0.924997	-1.07638	-1.17846
Acrochordus	granulatus	-1.00729	-0.902874	-0.919	-0.819147	-0.879099	-1.08636	-1.0478	-1.10212	-1.12429	-0.999712	-1.04285	-1.27613	-1.19534	-1.10984	-1.14137	-1.01088	-1.04919	-1.29192	-1.20447
Xenodermus	javanicus	-0.878906	-0.765231	-0.824757	-0.798081	-0.887387	-1.03736	-1.13263	-0.834348	-0.889579	-0.861923	-0.944189	-1.09728	-1.1848	-0.927036	-0.999842	-0.951871	-1.02036	-1.19921	-1.2583
Cerastes	cerastes	-0.863017	-0.795585	-0.882137	-0.776791	-0.711441	-1.02185	-1.03435	-0.986506	-1.07955	-0.949677	-0.868347	-1.20434	-1.17563	-0.970665	-1.07015	-0.938709	-0.855328	-1.19565	-1.16666
Ahaetulla	nasuta	-0.966985	-1.01281	-1.0606	-0.958476	-0.868483	-1.17644	-1.12566	-1.0463	-1.0918	-0.989453	-0.896009	-1.20528	-1.15098	-1.16296	-1.22231	-1.09881	-0.991881	-1.32593	-1.24033
Chrysopelea	paradisi	-0.785143	-0.816869	-0.916219	-0.865238	-0.621079	-0.928857	-1.05411	-0.934614	-1.03528	-0.972369	-0.717847	-1.03892	-1.14165	-0.945788	-1.05526	-0.986333	-0.72703	-1.05739	-1.15306
Aparallactus	werneri	-0.688707	-0.666443	-0.752649	-0.745373	-0.565654	-0.87761	-0.977282	-0.788687	-0.873148	-0.857183	-0.666118	-0.989002	-1.06865	-0.812711	-0.911067	-0.884852	-0.685862	-1.02405	-1.09126
Naja	naja	-0.831226	-0.870373	-0.975305	-0.867932	-0.697434	-1.0219	-0.9821	-0.958741	-1.06484	-0.948299	-0.770057	-1.10467	-1.04777	-0.935866	-1.04614	-0.930068	-0.751258	-1.08738	-1.03287
Laticauda	colubrina	-0.950741	-0.774336	-0.858405	-0.785331	-0.89169	-0.939267	-1.01604	-0.976674	-1.06967	-0.96817	-1.05798	-1.13457	-1.16545	-0.923773	-1.01849	-0.922313	-1.0145	-1.08726	-1.12798
Heloderma	horridum	-1.08758	-0.932094	-0.97588	-0.95137	-1.24855	-1.2926	-1.21028	-0.9131	-0.955422	-0.934323	-1.23294	-1.27369	-1.19635	-0.88153	-0.921885	-0.905561	-1.207	-1.24268	-1.17285
Heloderma	suspectum	-1.06543	-0.9747	-1.02215	-0.983295	-1.18752	-1.18321	-1.13346	-0.936747	-0.980835	-0.949319	-1.15633	-1.14501	-1.1057	-0.925537	-0.969912	-0.939565	-1.14711	-1.13491	-1.09773
Ophisaurus	apodus	-0.889898	-0.83082	-0.791316	-0.849111	-0.896293	-0.868737	-1.03405	-0.875923	-0.83702	-0.89013	-0.93336	-0.910986	-1.06756	-0.860855	-0.823836	-0.877718	-0.920976	-0.898798	-1.05742
Gerrhonotus	infernalis	-0.918101	-0.946281	-1.03022	-0.976835	-0.99554	-1.05607	-1.1571	-0.84927	-0.922857	-0.890318	-0.915812	-0.956824	-1.0864	-0.853039	-0.931835	-0.896071	-0.918909	-0.965124	-1.0911
Elgaria	coerulea	-0.862108	-0.85359	-0.868175	-0.852661	-0.81305	-0.952245	-1.06483	-0.889791	-0.900612	-0.886386	-0.842801	-0.98223	-1.09239	-0.99426	-1.02013	-0.985547	-0.928657	-1.09271	-1.17342
Lanthanotus	borneensis	-1.02337	-0.951722	-0.912969	-0.986153	-1.12477	-0.946877	-1.21801	-0.919999	-0.874173	-0.958556	-1.0987	-0.911014	-1.19546	-0.91587	-0.875961	-0.957673	-1.09531	-0.912666	-1.19474
Varanus	niloticus	-0.921461	-0.962649	-1.06762	-1.00123	-0.940692	-1.21948	-1.09693	-0.903723	-1.00689	-0.94783	-0.892264	-1.16334	-1.0533	-0.920365	-1.02213	-0.961852	-0.905941	-1.17742	-1.06476
Varanus	exanthematicus	-1.09149	-0.981492	-0.94754	-0.882008	-1.17472	-1.0594	-1.02207	-0.996669	-0.962163	-0.895953	-1.18719	-1.07291	-1.03346	-0.99811	-0.96564	-0.898173	-1.18837	-1.07613	-1.03528
Varanus	salvator	-1.14407	-1.11912	-1.11658	-1.06015	-1.29092	-1.28588	-1.23871	-1.00252	-0.996167	-0.954534	-1.19509	-1.17456	-1.15241	-1.01945	-1.00949	-0.967787	-1.20901	-1.18688	-1.16324
Varanus	jobiensis	-0.803515	-0.791529	-0.860838	-0.785356	-0.756869	-0.948341	-0.850482	-0.837899	-0.909002	-0.827304	-0.794977	-0.992865	-0.884759	-0.857735	-0.931808	-0.846186	-0.81128	-1.01395	-0.900188
Varanus	giganteus	-1.03866	-1.07565	-1.05896	-1.00165	-1.18741	-1.16293	-1.13587	-0.896519	-0.87009	-0.840125	-1.04019	-0.988341	-1.00388	-0.99688	-0.974987	-0.93076	-1.12267	-1.08531	-1.07794
Chamaeleo	senegalensis laevigatus	-1.00032	-1.03134	-1.09523	-0.926647	-1.00059	-1.20984	-1.15587	-1.00394	-1.06058	-0.90303	-0.97807	-1.1778	-1.13658	-0.995077	-1.05788	-0.89809	-0.970787	-1.17531	-1.13254
Brookesia	brygooi	-1.14911	-1.09583	-1.14548	-1.14678	-1.25155	-1.39853	-1.48555	-1.04495	-1.0829	-1.10259	-1.20973	-1.34068	-1.44944	-1.02284	-1.06963	-1.08721	-1.19157	-1.32842	-1.43687
Draco	quinquefasciatus	-0.926436	-0.992948	-0.995271	-0.912265	-0.9151	-1.0033	-0.996223	-0.949408	-0.942235	-0.87435	-0.879317	-0.95427	-0.965241	-0.94438	-0.94511	-0.8736	-0.875185	-0.956928	-0.964628
Uromastyx	hardwickii	-0.97777	-1.08471	-1.16812	-1.06246	-0.957604	-1.22169	-1.16735	-1.01762	-1.09461	-1.00249	-0.902467	-1.15374	-1.11834	-0.973707	-1.05008	-0.963468	-0.866377	-1.11258	-1.08646
Saara	aegyptia	-0.788713	-0.871107	-0.9063	-0.940836	-0.669947	-0.863003	-1.05632	-0.917328	-0.953527	-0.982798	-0.707933	-0.90666	-1.09061	-0.862484	-0.897338	-0.933797	-0.66286	-0.854718	-1.05057
Sceloporus	variabilis	-0.533677	-0.71671	-0.906386	-0.810904	-0.421832	-0.923176	-0.958512	-0.662256	-0.841856	-0.763145	-0.377079	-0.863523	-0.919486	-0.651363	-0.838278	-0.756948	-0.368127	-0.860216	-0.914423
Leiocephalus	barahonensis	-0.397068	-0.607128	-0.797797	-0.815411	-0.214535	-0.638579	-0.726567	-0.597087	-0.780056	-0.807707	-0.206284	-0.622178	-0.720271	-0.578299	-0.768707	-0.794604	-0.190843	-0.611687	-0.709565
Morunasaurus	annularis	-0.773649	-0.916121	-0.980441	-0.970888	-0.703005	-0.909089	-0.940857	-0.866717	-0.924187	-0.927125	-0.662402	-0.857088	-0.905096	-0.826897	-0.88603	-0.892778	-0.629677	-0.821815	-0.877031
Gambelia	wislizenii	-0.847968	-0.861305	-0.932293	-0.841378	-0.756493	-0.917343	-0.874656	-0.93003	-0.999882	-0.904267	-0.812974	-0.979824	-0.926044	-0.940425	-1.01806	-0.917066	-0.821517	-0.99663	-0.936503
Basiliscus	basiliscus barbouri	-0.755493	-0.861579	-0.859009	-0.932826	-0.687691	-0.805438	-1.02665	-0.839061	-0.832628	-0.913019	-0.669185	-0.78105	-1.01047	-0.81644	-0.811372	-0.893703	-0.650594	-0.761401	-0.994685
Liolaemus	chilensis	-0.760318	-0.879184	-1.01061	-0.925753	-0.715917	-0.982647	-1.08834	-0.818995	-0.940337	-0.872766	-0.666452	-0.917687	-1.04504	-0.80834	-0.936554	-0.866572	-0.657696	-0.914189	-1.03998
Liolaemus	bellii	-0.738725	-0.836853	-0.884848	-0.844972	-0.677827	-0.907959	-0.889375	-0.81169	-0.850988	-0.823665	-0.657146	-0.876659	-0.871964	-0.795136	-0.842031	-0.812606	-0.643542	-0.868379	-0.862927
Anolis	sagrei	-0.750141	-0.835188	-0.902236	-0.892582	-0.694557	-0.876458	-0.899636	-0.807291	-0.864308	-0.869033	-0.671631	-0.841396	-0.880394	-0.854189	-0.924732	-0.916705	-0.710173	-0.897253	-0.919348
Anolis	grahami	-1.12765	-1.14967	-1.12528	-1.02843	-1.22809	-1.21573	-1.07058	-1.03477	-0.996647	-0.926238	-1.13366	-1.09682	-0.987079	-1.07983	-1.05258	-0.971051	-1.17069	-1.14853	-1.0237
Eothyris	parkeri	-0.932875	-1.0437	-1.04479	-1.06649	-0.813138	-0.983625	-0.982312	-1.06957	-1.07208	-1.08981	-0.834393	-1.00886	-1.00136	-1.00959	-1.00821	-1.03509	-0.785107	-0.949807	-0.956652
Dimetrodon	sp.	-0.978255	-1.05886	-1.03395	-1.01465	-0.981294	-1.0495	-0.922339	-0.981761	-0.958804	-0.943975	-0.917935	-0.980032	-0.864588	-1.04696	-1.01987	-0.999556	-0.971519	-1.03648	-0.910006
Hipposaurus	boonstrai	-0.769086	-0.926865	-1.00032	-0.970163	-0.663425	-0.93829	-0.876994	-0.891673	-0.968323	-0.937467	-0.634503	-0.908714	-0.850277	-0.885775	-0.955141	-0.928868	-0.629656	-0.896528	-0.84325
Lemurosaurus	pricei	-0.983689	-1.06804	-1.02764	-0.944869	-0.964011	-1.031	-0.883165	-1.01067	-0.968435	-0.892891	-0.916857	-0.976267	-0.840691	-1.06748	-1.02684	-0.943743	-0.963545	-1.03026	-0.882245
Leucocephalus	wewersi	-0.93229	-1.04065	-0.999836	-0.935169	-0.87041	-0.95827	-0.771614	-1.00915	-0.96928	-0.906258	-0.844518	-0.930024	-0.747991	-1.01398	-0.970687	-0.908923	-0.848488	-0.931325	-0.750168
Herpetoskylax	hopsoni	-0.848056	-0.962461	-0.980482	-0.977464	-0.801605	-1.03355	-0.94991	-0.901308	-0.91803	-0.92194	-0.751348	-0.975814	-0.90454	-0.959264	-0.976692	-0.973388	-0.798978	-1.03004	-0.946579
Moschops	capensis	-0.999098	-1.05348	-1.05883	-1.07171	-1.01564	-1.10099	-1.05606	-0.989729	-0.999294	-1.01278	-0.963246	-1.04595	-1.00791	-1.01293	-1.01367	-1.02913	-0.982317	-1.05924	-1.02127
Patranomodon	nyaphulii	-0.899811	-0.962786	-0.966903	-0.902342	-0.843244	-0.969844	-0.796553	-0.967045	-0.971221	-0.906215	-0.846744	-0.973835	-0.799719	-0.931831	-0.933791	-0.874122	-0.817803	-0.939234	-0.773494
Eodicynodon	oosthuizeni	-1.07616	-1.12335	-1.1169	-1.04653	-1.03688	-1.05631	-0.930311	-1.12838	-1.12436	-1.05066	-1.04102	-1.06321	-0.933687	-1.07594	-1.06559	-1.00145	-0.997918	-1.00888	-0.893478
Diictodon	feliceps	-0.825489	-0.843723	-0.782708	-0.771692	-0.791491	-0.755171	-0.76477	-0.869709	-0.807848	-0.79555	-0.812847	-0.77841	-0.784265	-0.81307	-0.750385	-0.745208	-0.766298	-0.72529	-0.743129
Pristerodon	mackayi	-0.789277	-0.893178	-0.902979	-0.925562	-0.681107	-0.780878	-0.824727	-0.917389	-0.93015	-0.947083	-0.701004	-0.805995	-0.842313	-0.8369	-0.842264	-0.87264	-0.634855	-0.724751	-0.781483
Niassodon	mfumukasi	-0.951432	-0.976143	-1.02603	-1.03188	-0.919473	-1.0473	-1.0199	-0.989419	-1.03995	-1.04386	-0.930383	-1.06016	-1.02969	-0.938723	-0.985952	-0.99761	-0.888719	-1.01025	-0.991893
Endothiodon	bathystoma	-0.963866	-1.08324	-1.14855	-1.03515	-0.870775	-1.09738	-0.852416	-1.07697	-1.14889	-1.02819	-0.865626	-1.0977	-0.846728	-1.01021	-1.06865	-0.96302	-0.810754	-1.02352	-0.793473
Endothiodon	tolani	-1.07071	-1.12167	-1.02422	-1.01261	-1.04276	-0.938678	-0.815957	-1.11617	-1.0226	-1.00686	-1.03824	-0.937182	-0.81126	-1.06714	-0.964817	-0.959534	-0.997945	-0.883767	-0.772589
Abajudon	kaayai	-1.00833	-1.09009	-1.15712	-1.16191	-0.931043	-1.13472	-1.15849	-1.09814	-1.16764	-1.16879	-0.93766	-1.14444	-1.16411	-1.04157	-1.10465	-1.1159	-0.891167	-1.08622	-1.12089
Dicynodontoides	cf. recurvidens	-0.729799	-0.827558	-0.926315	-1.00651	-0.616815	-0.925339	-1.02704	-0.859162	-0.96277	-1.03441	-0.642788	-0.959039	-1.04984	-0.756295	-0.849172	-0.938677	-0.558248	-0.854028	-0.971611
Kembawacela	kitchingi	-0.73949	-0.9	-1.003	-0.98167	-0.590648	-0.864559	-0.903013	-0.904028	-1.00551	-0.985629	-0.593958	-0.866885	-0.906247	-0.879886	-0.981878	-0.964571	-0.574118	-0.845035	-0.88904
Kawingasaurus	fossilis	-0.835758	-0.934166	-1.04391	-1.01412	-0.740039	-1.11939	-0.869974	-0.936981	-1.04389	-1.01722	-0.742352	-1.11937	-0.872509	-0.923467	-1.03318	-1.00661	-0.731246	-1.10947	-0.863839
Oudenodon	bainii	-1.16959	-1.21065	-1.21271	-1.21077	-1.13056	-1.19675	-1.24528	-1.22306	-1.23029	-1.22111	-1.14076	-1.21301	-1.25373	-1.14234	-1.13843	-1.14472	-1.07442	-1.12809	-1.19131
Aulacephalodon	sp.	-1.02626	-1.07425	-1.11903	-1.04625	-0.995028	-1.11366	-0.971706	-1.07132	-1.12281	-1.04231	-0.992624	-1.11716	-0.968492	-0.999639	-1.03746	-0.972712	-0.93371	-1.03826	-0.911618
Lystrosaurus	declivis	-1.03775	-1.09843	-1.16263	-1.02358	-0.992338	-1.18944	-0.944751	-1.09214	-1.15813	-1.0175	-0.987166	-1.18527	-0.939786	-1.05851	-1.11938	-0.985451	-0.959528	-1.14945	-0.913598
Lystrosaurus	murrayi	-1.03175	-1.07623	-1.1059	-1.00576	-0.982063	-1.0565	-0.877155	-1.09484	-1.12794	-1.02209	-0.997363	-1.07686	-0.890503	-1.01836	-1.04331	-0.950835	-0.934503	-0.998633	-0.832275
Sangusaurus	parringtonii	-0.960845	-1.06319	-1.03529	-1.03719	-0.940709	-1.0302	-1.04184	-0.993689	-0.969536	-0.973095	-0.883587	-0.969415	-0.989463	-1.02695	-0.994781	-0.998695	-0.910923	-0.992752	-1.01038
Scylacocephalus	sp.	-0.895579	-0.963487	-0.91071	-0.845377	-0.870714	-0.82421	-0.814455	-0.932081	-0.879307	-0.816736	-0.844903	-0.795181	-0.791051	-0.941796	-0.88713	-0.824422	-0.852887	-0.802413	-0.797332
Lycaenops	sp.	-1.04879	-1.05818	-1.02644	-0.976986	-1.08531	-1.059	-0.967423	-1.01853	-0.990005	-0.940216	-1.05272	-1.02532	-0.937378	-1.0167	-0.980797	-0.935164	-1.05123	-1.01681	-0.933249
Dixeya	nasuta	-0.76141	-0.813483	-0.806579	-0.753647	-0.780902	-0.914666	-0.77378	-0.744993	-0.738637	-0.691084	-0.724615	-0.851859	-0.722658	-0.798134	-0.78924	-0.736772	-0.768288	-0.898638	-0.759991
Gorgonsopsia indet	-	-0.868423	-0.932854	-0.903168	-0.89103	-0.859952	-0.875486	-0.886514	-0.885337	-0.856163	-0.8476	-0.820901	-0.832033	-0.851026	-0.912054	-0.880237	-0.869933	-0.842858	-0.854288	-0.869275
"Aloposaurus"	-	-0.990037	-1.07347	-1.09612	-1.00397	-0.964093	-1.20543	-0.927011	-1.02261	-1.04597	-0.957449	-0.922293	-1.15906	-0.888999	-1.05222	-1.07263	-0.98219	-0.946631	-1.1837	-0.909216
Oliveirosuchus	parringtoni	-1.13109	-1.19557	-1.26324	-1.09457	-1.12036	-1.40051	-1.00105	-1.14252	-1.2086	-1.04648	-1.07676	-1.34999	-0.961754	-1.19056	-1.25767	-1.08934	-1.11624	-1.39536	-0.996776
Euchambersia	mirabilis	-0.972268	-1.04338	-0.975519	-1.03298	-0.953931	-0.866307	-0.945939	-1.00131	-0.932918	-0.994729	-0.919363	-0.826926	-0.914679	-1.02817	-0.958899	-1.01801	-0.941435	-0.850943	-0.933701
Ictidosuchoides	sp.	-0.890931	-0.987041	-1.00283	-0.975597	-0.870063	-1.0783	-0.965943	-0.915727	-0.929718	-0.910902	-0.811455	-1.01071	-0.913078	-0.98844	-1.00397	-0.975755	-0.871213	-1.07935	-0.966072
Mupashi	migrator	-1.07542	-1.06706	-1.0614	-1.01366	-1.1294	-1.18255	-1.0491	-1.0183	-1.01105	-0.969491	-1.08932	-1.136	-1.013	-1.06087	-1.05462	-1.00751	-1.12431	-1.17628	-1.04407
Microgomphodon	oligocynus	-0.900713	-0.921291	-0.928337	-0.914745	-0.88832	-0.877212	-0.842231	-0.921307	-0.929744	-0.914497	-0.888334	-0.878513	-0.842029	-0.881407	-0.885289	-0.87718	-0.855542	-0.837418	-0.811536
Choerosaurus	dejageri	-0.829927	-0.863197	-0.903512	-0.87093	-0.869384	-1.00441	-0.826111	-0.785194	-0.822113	-0.800435	-0.805278	-0.929162	-0.768507	-0.877346	-0.91862	-0.883746	-0.881012	-1.01837	-0.836584
Procynosuchus	delaharpeae	-0.879147	-0.97476	-1.01179	-0.944124	-0.849098	-0.995884	-0.872333	-0.913903	-0.948226	-0.889135	-0.799084	-0.937126	-0.8274	-0.9779	-1.01513	-0.946938	-0.851678	-0.998974	-0.874632
Cynosaurus	suppostus	-0.754328	-0.846087	-0.872836	-0.843372	-0.704603	-0.860366	-0.745099	-0.812535	-0.838212	-0.812977	-0.677029	-0.828358	-0.720262	-0.830342	-0.855864	-0.828611	-0.691663	-0.844676	-0.733037
Galesaurus	planiceps	-0.999073	-0.96316	-0.985775	-1.0312	-1.04399	-1.21914	-1.12013	-0.951323	-0.974914	-1.02022	-1.03426	-1.2091	-1.11116	-0.92719	-0.946887	-0.997119	-1.01442	-1.18319	-1.09228
Thrinaxodon	liorhinus	-0.653217	-0.714774	-0.833185	-0.846411	-0.625863	-0.758327	-0.722098	-0.682778	-0.799478	-0.817555	-0.599568	-0.727168	-0.698518	-0.702446	-0.820045	-0.835321	-0.615731	-0.74618	-0.713036
Trirachodon	berryi	-0.827519	-0.896024	-0.888883	-0.871558	-0.793986	-0.876003	-0.79413	-0.871238	-0.864648	-0.84885	-0.773615	-0.8536	-0.775574	-0.865538	-0.855826	-0.842367	-0.768931	-0.845445	-0.770276
Cricodon	kannemeyeri	-0.615145	-0.761721	-0.802912	-0.96068	-0.515723	-0.692361	-0.908351	-0.728564	-0.769305	-0.930526	-0.488473	-0.661294	-0.883711	-0.740375	-0.779794	-0.940327	-0.49818	-0.67099	-0.89172
Scalenodon	angustifrons	-0.819611	-0.846324	-0.915177	-0.93166	-0.832627	-0.996714	-0.918129	-0.808163	-0.878416	-0.896596	-0.801266	-0.962731	-0.889476	-0.81366	-0.879431	-0.899354	-0.805783	-0.96367	-0.891731
Massethognathus	pascuali	-0.719184	-0.769648	-0.831076	-0.730449	-0.687337	-0.828423	-0.544153	-0.758556	-0.820772	-0.720184	-0.678221	-0.818898	-0.535766	-0.733816	-0.79239	-0.696666	-0.657889	-0.792662	-0.516548
Luangwa	drysdalli	-1.03169	-1.05154	-1.03029	-0.90688	-1.03131	-1.08482	-0.831098	-1.04051	-1.02108	-0.896474	-1.02224	-1.07631	-0.822595	-1.0086	-0.983729	-0.865791	-0.996009	-1.04178	-0.797522
Lumkuia	fuzzi	-0.896554	-0.886134	-0.94947	-0.863236	-0.910884	-1.04352	-0.804522	-0.882036	-0.944503	-0.859662	-0.907516	-1.03893	-0.801602	-0.857221	-0.918678	-0.837304	-0.887122	-1.01505	-0.783332
Chiniquodon	theotenicus	-0.8294	-0.894883	-0.796833	-1.00065	-0.806769	-0.774916	-1.10687	-0.865788	-0.769396	-0.973804	-0.782857	-0.749553	-1.08494	-0.853809	-0.752118	-0.960767	-0.773013	-0.733581	-1.07428
Riograndia	guaibensis	-1.00972	-0.929706	-0.903401	-0.841028	-1.10239	-1.11256	-0.905434	-0.907018	-0.875622	-0.821298	-1.08374	-1.08689	-0.889312	-0.93211	-0.90697	-0.846346	-1.10437	-1.11586	-0.90978
Tritylodon	longaevus	-0.566606	-0.59345	-0.60891	-0.637491	-0.547174	-0.606341	-0.636435	-0.597768	-0.617182	-0.640684	-0.550723	-0.613988	-0.639043	-0.526208	-0.535987	-0.573074	-0.491912	-0.538931	-0.583796
Oligokyphus	major	-0.580428	-0.594611	-0.550552	-0.674194	-0.587265	-0.618631	-0.758185	-0.57862	-0.53378	-0.659758	-0.574123	-0.603127	-0.746389	-0.565365	-0.519249	-0.647471	-0.563229	-0.589693	-0.736349
Pseudotherium	argentinus	-0.494443	-0.627175	-0.664268	-0.692406	-0.424622	-0.666605	-0.68661	-0.572478	-0.606215	-0.643158	-0.37967	-0.612941	-0.646367	-0.626108	-0.663336	-0.692089	-0.423745	-0.665744	-0.68635
Brasilodon	quadrangularis	-0.671846	-0.686977	-0.690207	-0.748165	-0.680886	-0.809872	-0.806196	-0.661141	-0.659799	-0.725466	-0.659653	-0.781762	-0.787648	-0.686141	-0.690145	-0.750009	-0.680199	-0.809814	-0.807703
Megazostrodon	rudnerae	-0.226079	-0.388486	-0.483542	-0.455861	-0.0982706	-0.41263	-0.292507	-0.364101	-0.453429	-0.434702	-0.0782294	-0.384793	-0.275218	-0.394776	-0.491409	-0.465164	-0.10344	-0.419902	-0.30011
Morganucodon	watsoni	-0.577101	-0.616309	-0.615258	-0.710469	-0.574406	-0.66075	-0.86708	-0.577083	-0.56832	-0.67615	-0.542168	-0.61736	-0.839037	-0.640243	-0.642339	-0.736922	-0.594075	-0.685784	-0.888695
Morganucodon	oehleri	-0.465175	-0.570077	-0.598013	-0.608058	-0.400946	-0.633258	-0.580227	-0.531329	-0.550668	-0.574342	-0.369102	-0.589492	-0.552677	-0.599955	-0.631681	-0.640648	-0.425501	-0.664382	-0.606858
Haldanodon	exspectatus	-0.553355	-0.58424	-0.547192	-0.568469	-0.545454	-0.687228	-0.645918	-0.563237	-0.521778	-0.550147	-0.528193	-0.663735	-0.630947	-0.580445	-0.543975	-0.567651	-0.542335	-0.684255	-0.64525
Hadrocodium	wui	-0.766324	-0.740683	-0.708225	-0.715442	-0.799379	-0.851281	-0.751241	-0.72629	-0.684574	-0.704063	-0.78755	-0.829417	-0.741942	-0.764042	-0.735349	-0.743433	-0.818576	-0.876354	-0.774113
Tachyglossus	aculeatus	-0.475198	-0.621973	-0.582623	-0.480465	-0.410491	-0.569193	-0.347329	-0.558716	-0.517729	-0.423087	-0.358504	-0.509204	-0.300443	-0.58211	-0.539631	-0.443025	-0.37773	-0.529451	-0.316735
Zaglossus	bartoni smeenki	-0.885421	-0.860781	-0.68134	-0.668289	-0.992309	-0.913487	-0.682366	-0.772412	-0.59171	-0.587938	-0.919684	-0.830633	-0.616708	-0.888527	-0.710366	-0.691538	-1.01511	-0.940319	-0.701364
Ornithorhynchus	anatinus	-0.60461	-0.716395	-0.68914	-0.606336	-0.577495	-0.726689	-0.359894	-0.636074	-0.605277	-0.533755	-0.511485	-0.649165	-0.300586	-0.739445	-0.713789	-0.627328	-0.596439	-0.749475	-0.377047
Dryolestes	leiriensis	-0.28385	-0.408784	-0.401904	-0.475134	-0.145141	-0.332706	-0.325228	-0.411321	-0.402001	-0.477908	-0.147226	-0.332796	-0.327494	-0.569638	-0.574768	-0.624285	-0.277336	-0.492504	-0.447104
Dasyurus	viverrinus	-0.341768	-0.522587	-0.647881	-0.573583	-0.262694	-0.462405	-0.371945	-0.44764	-0.568757	-0.506023	-0.201101	-0.389262	-0.316739	-0.41574	-0.533659	-0.476396	-0.174884	-0.356816	-0.292529
Isoodon	obesulus	-0.271309	-0.411103	-0.465884	-0.475287	-0.203113	-0.325146	-0.306797	-0.35163	-0.403054	-0.421685	-0.154237	-0.267065	-0.262996	-0.395247	-0.449063	-0.46127	-0.190082	-0.309596	-0.295343
Phascolarctos	cinereus	-0.529642	-0.56963	-0.622035	-0.598288	-0.519568	-0.637413	-0.471678	-0.551252	-0.605044	-0.581267	-0.504465	-0.621706	-0.45777	-0.495454	-0.542063	-0.528702	-0.458608	-0.563485	-0.414817
Monodelphis	domestica	-0.302464	-0.446383	-0.421812	-0.466662	-0.289283	-0.260844	-0.290651	-0.343402	-0.309793	-0.374453	-0.204649	-0.157292	-0.215302	-0.335785	-0.304451	-0.368795	-0.198389	-0.152354	-0.210679
Didelphis	virginiana	-0.261155	-0.396709	-0.346282	-0.459477	-0.231961	-0.246427	-0.389264	-0.316541	-0.263292	-0.3869	-0.166076	-0.169709	-0.329958	-0.296938	-0.239245	-0.367537	-0.149965	-0.14748	-0.314137
Dasypus	novemcinctus	-0.318768	-0.461739	-0.463899	-0.528298	-0.17039	-0.170906	-0.278714	-0.476329	-0.480803	-0.541167	-0.18238	-0.186533	-0.289229	-0.516281	-0.521896	-0.576937	-0.215215	-0.224519	-0.318458
Procavia	capensis	-0.499402	-0.531099	-0.611124	-0.643039	-0.442418	-0.574713	-0.623405	-0.561886	-0.644627	-0.670605	-0.46772	-0.605683	-0.645929	-0.502856	-0.580563	-0.616192	-0.419208	-0.546462	-0.601467
Elephas	maximus	-0.855015	-0.915116	-0.849103	-0.841653	-0.822189	-0.910636	-0.574512	-0.907981	-0.853313	-0.833007	-0.816326	-0.914529	-0.567446	-0.825119	-0.749872	-0.750325	-0.748226	-0.818906	-0.499884
Dugong	dugon	-0.296441	-0.345182	-0.45006	-0.507138	-0.256406	-0.552754	-0.349639	-0.348388	-0.461879	-0.508437	-0.259041	-0.563681	-0.3507	-0.254578	-0.350965	-0.417718	-0.181944	-0.46115	-0.276571
Trichechus	manatus	-0.393206	-0.465701	-0.494945	-0.541356	-0.331255	-0.457907	-0.294421	-0.476886	-0.515374	-0.549813	-0.340447	-0.476791	-0.301332	-0.359227	-0.378793	-0.437212	-0.243751	-0.350534	-0.209322
Orycteropus	afer	-0.370627	-0.530724	-0.65419	-0.661319	-0.282567	-0.417158	-0.278843	-0.470522	-0.596742	-0.605898	-0.233091	-0.364052	-0.233556	-0.51896	-0.640241	-0.646319	-0.272899	-0.404263	-0.266585
Chrysochloris	sp.	-0.249927	-0.406145	-0.443177	-0.488312	-0.110764	-0.381795	-0.33172	-0.395867	-0.426965	-0.480058	-0.102317	-0.366809	-0.324975	-0.448463	-0.489831	-0.531237	-0.145542	-0.424922	-0.366796
Hemicentetes	semispinosus	-0.209076	-0.336796	-0.409403	-0.469085	-0.0920056	-0.30586	-0.352568	-0.331946	-0.400249	-0.465474	-0.08802	-0.297397	-0.349617	-0.363089	-0.438559	-0.496285	-0.113614	-0.332812	-0.374794
Elephantulus	sp.	-0.550417	-0.657035	-0.717598	-0.772536	-0.506293	-0.696411	-0.604339	-0.604119	-0.657181	-0.725694	-0.462805	-0.640559	-0.566063	-0.625888	-0.685496	-0.747947	-0.480696	-0.666735	-0.584247
Macroscelides	proboscideus	-0.265559	-0.476615	-0.633698	-0.650397	-0.175324	-0.567153	-0.354674	-0.378304	-0.525209	-0.562661	-0.0945288	-0.466864	-0.282982	-0.388083	-0.540298	-0.573763	-0.102566	-0.480813	-0.292054
Cavia	porcellus	-0.178494	-0.383583	-0.574566	-0.566056	-0.0573581	-0.478656	-0.297132	-0.318209	-0.504997	-0.507229	-0.00363166	-0.414346	-0.249062	-0.322169	-0.509103	-0.510791	-0.00688619	-0.418142	-0.251972
Sciurus	vulgaris	-0.33788	-0.483085	-0.50212	-0.522719	-0.280696	-0.311395	-0.311915	-0.418988	-0.432644	-0.46528	-0.228019	-0.24717	-0.264979	-0.402806	-0.416762	-0.451147	-0.21472	-0.232488	-0.25343
Mus	musculus	-0.133864	-0.311563	-0.288047	-0.399251	-0.0345626	-0.0557296	-0.240203	-0.257195	-0.22413	-0.351472	0.0101187	0.00335687	-0.20116	-0.265991	-0.240985	-0.362988	0.00289015	-0.012225	-0.210571
Lepus	californicus	-0.2378	-0.434996	-0.546081	-0.570245	-0.122099	-0.51974	-0.452301	-0.373622	-0.482477	-0.514695	-0.0716593	-0.460944	-0.406909	-0.373451	-0.480039	-0.513486	-0.0715184	-0.45869	-0.405922
Sylvilagus	floridanus	-0.268889	-0.426984	-0.52995	-0.477693	-0.159382	-0.442437	-0.273346	-0.393487	-0.494423	-0.447528	-0.131853	-0.409596	-0.248697	-0.394602	-0.495399	-0.448447	-0.13277	-0.410498	-0.249447
Oryctolagus	cuniculus	-0.556825	-0.635179	-0.733796	-0.699929	-0.490511	-0.760327	-0.559012	-0.628297	-0.726718	-0.69369	-0.484855	-0.753784	-0.553914	-0.61882	-0.716251	-0.684869	-0.477067	-0.744108	-0.546706
Tupaia	javanica	-0.467073	-0.577426	-0.675875	-0.713223	-0.457571	-0.593283	-0.59334	-0.492132	-0.582732	-0.636919	-0.387473	-0.50718	-0.530989	-0.49391	-0.58742	-0.639844	-0.388934	-0.511514	-0.533379
Tupaia	glis	-0.224444	-0.46857	-0.613247	-0.591205	-0.123345	-0.365727	-0.159349	-0.353385	-0.48898	-0.487874	-0.028682	-0.250852	-0.074913	-0.380472	-0.519852	-0.513531	-0.0509428	-0.279391	-0.0958778
Cynocephalus	volans	-0.387617	-0.570564	-0.686409	-0.580527	-0.256331	-0.570927	-0.285913	-0.536093	-0.649638	-0.549525	-0.228001	-0.536936	-0.26058	-0.540241	-0.654118	-0.553338	-0.23141	-0.541077	-0.263696
Nycticebus	coucang	-0.552581	-0.647029	-0.707392	-0.748625	-0.489573	-0.578867	-0.529957	-0.636508	-0.695429	-0.739302	-0.480926	-0.567808	-0.522339	-0.553919	-0.60793	-0.664168	-0.413052	-0.486923	-0.460944
Euoticus	elegantulus	-0.49783	-0.723677	-0.751581	-0.681002	-0.320406	-0.337594	-0.269644	-0.707879	-0.732448	-0.667224	-0.307422	-0.319906	-0.258385	-0.670552	-0.695339	-0.634402	-0.276746	-0.285602	-0.231565
Microcebus	sp.	-0.437334	-0.651825	-0.679082	-0.693529	-0.347744	-0.465791	-0.456799	-0.565263	-0.583051	-0.616374	-0.276604	-0.377019	-0.393752	-0.510016	-0.528592	-0.568013	-0.2312	-0.326676	-0.354234
Lemur	catta	-0.408353	-0.523947	-0.652156	-0.60756	-0.32145	-0.600685	-0.449512	-0.510375	-0.638447	-0.59521	-0.310297	-0.588012	-0.43942	-0.460328	-0.583917	-0.548977	-0.269166	-0.537604	-0.401641
Saimiri	sciureus	-0.377358	-0.593163	-0.692241	-0.663047	-0.148342	-0.373649	-0.282524	-0.635802	-0.735685	-0.701781	-0.183384	-0.41381	-0.314174	-0.543411	-0.639249	-0.618403	-0.107454	-0.324663	-0.246044
Callithrix	jacchus	-0.718398	-0.82587	-0.798061	-0.794522	-0.668945	-0.658032	-0.566919	-0.796814	-0.765238	-0.768735	-0.645066	-0.62769	-0.545848	-0.707424	-0.671833	-0.688019	-0.571601	-0.541345	-0.479891
Papio	hamadryas	-0.400603	-0.602827	-0.557139	-0.597097	-0.302175	-0.307473	-0.205483	-0.528005	-0.482459	-0.528835	-0.240683	-0.238438	-0.149704	-0.542337	-0.491493	-0.539006	-0.252462	-0.246789	-0.158015
Macaca	mulatta	-0.383435	-0.549283	-0.583605	-0.648193	-0.19478	-0.259787	-0.360762	-0.594602	-0.633663	-0.688628	-0.232025	-0.30606	-0.393803	-0.530536	-0.562877	-0.628987	-0.179373	-0.240625	-0.345068
Macaca	fascicularis	-0.50168	-0.664105	-0.7298	-0.769568	-0.434856	-0.516956	-0.548439	-0.596559	-0.660722	-0.708258	-0.379345	-0.4531	-0.49834	-0.55361	-0.611103	-0.667266	-0.344047	-0.407231	-0.464844
Hylobates	lar	-0.52415	-0.658452	-0.721702	-0.743784	-0.370835	-0.565389	-0.468505	-0.6969	-0.76381	-0.778156	-0.402433	-0.604314	-0.496592	-0.617459	-0.677341	-0.704811	-0.337146	-0.524381	-0.436658
Pongo	abelii	-0.631283	-0.706657	-0.759075	-0.812109	-0.53578	-0.724994	-0.716135	-0.732054	-0.791536	-0.833939	-0.556653	-0.755002	-0.733972	-0.711806	-0.763138	-0.812279	-0.540012	-0.72875	-0.716273
Homo	sapiens	-0.782316	-0.755691	-0.815179	-0.776425	-0.666622	-0.800917	-0.615345	-0.89818	-0.969644	-0.90411	-0.783725	-0.943706	-0.719682	-0.767266	-0.826231	-0.782813	-0.676134	-0.811133	-0.620565
Pan	paniscus	-0.802854	-0.737456	-0.720038	-0.775904	-0.753233	-0.772647	-0.662321	-0.844865	-0.83721	-0.872015	-0.841505	-0.880963	-0.740856	-0.77848	-0.762773	-0.809707	-0.786948	-0.812151	-0.689942
Sorex	monticolus	-0.388059	-0.494785	-0.552258	-0.611402	-0.366993	-0.450049	-0.631853	-0.422974	-0.468681	-0.548133	-0.307976	-0.372789	-0.580153	-0.437163	-0.492643	-0.565205	-0.319638	-0.39494	-0.594104
Atelerix	albiventris	-0.272893	-0.322596	-0.421542	-0.426617	-0.123132	-0.303144	-0.213165	-0.417794	-0.520148	-0.512791	-0.201369	-0.394297	-0.28358	-0.399216	-0.503815	-0.497451	-0.186101	-0.379198	-0.271046
Nycteris	grandis	-0.257136	-0.427528	-0.371064	-0.519413	-0.198906	-0.109451	-0.277061	-0.347132	-0.280897	-0.447938	-0.132834	-0.0260998	-0.218656	-0.326935	-0.264849	-0.432059	-0.116235	-0.011265	-0.20568
Tadarida	brasiliensis	-0.412008	-0.480126	-0.509654	-0.570202	-0.359755	-0.460399	-0.359811	-0.474137	-0.49595	-0.566196	-0.354833	-0.447731	-0.356538	-0.448105	-0.477195	-0.546628	-0.333439	-0.430393	-0.340548
Carollia	perspicillata	-0.302491	-0.414429	-0.383738	-0.490552	-0.241053	-0.196342	-0.242141	-0.382085	-0.3428	-0.462676	-0.214472	-0.158499	-0.219363	-0.372549	-0.340642	-0.457706	-0.206635	-0.156504	-0.215301
Rhinolophus	ferrumequinum	-0.0980881	-0.299256	-0.380955	-0.377951	-0.0114521	-0.142146	-0.0570779	-0.212977	-0.283827	-0.301316	0.0594544	-0.0523585	0.00554391	-0.206183	-0.282993	-0.298102	0.0650383	-0.0515876	0.00816975
Pteropus	lylei	0.025287	-0.254453	-0.339199	-0.245293	0.168635	-0.0129022	0.175151	-0.160118	-0.238562	-0.160453	0.246163	0.0801283	0.244477	-0.12425	-0.200273	-0.127687	0.27564	0.115524	0.271251
Pteropus	rodricensis	-0.244204	-0.436167	-0.53066	-0.45204	-0.151534	-0.392456	-0.210764	-0.363961	-0.452344	-0.387344	-0.092193	-0.32006	-0.157898	-0.339565	-0.427913	-0.36581	-0.0721436	-0.297475	-0.140302
Manis	tricuspis	-0.73301	-0.665891	-0.688278	-0.710632	-0.740216	-0.742196	-0.884	-0.712182	-0.73825	-0.752153	-0.778259	-0.788391	-0.917929	-0.718841	-0.744591	-0.757879	-0.783732	-0.794253	-0.922607
Cynictis	penicillata	-0.635404	-0.654291	-0.783624	-0.668704	-0.576243	-0.850159	-0.447864	-0.693631	-0.823808	-0.704421	-0.608574	-0.887306	-0.47705	-0.647533	-0.776621	-0.663254	-0.570689	-0.843686	-0.443411
Felis	catus	-0.67015	-0.774202	-0.742383	-0.757784	-0.607796	-0.516522	-0.491512	-0.760189	-0.728956	-0.744895	-0.59628	-0.504109	-0.48098	-0.674807	-0.635655	-0.665894	-0.52611	-0.417861	-0.416425
Canis	lupus familiaris	-0.558693	-0.585197	-0.477474	-0.595649	-0.610857	-0.389008	-0.495462	-0.507408	-0.401705	-0.524328	-0.546927	-0.318966	-0.437183	-0.604658	-0.496944	-0.609167	-0.626851	-0.407006	-0.506508
Nasua	nasua	-0.384207	-0.531919	-0.64679	-0.480176	-0.333664	-0.571262	-0.298469	-0.454354	-0.566945	-0.40987	-0.269918	-0.497452	-0.241019	-0.448943	-0.557632	-0.403278	-0.265471	-0.488843	-0.235633
Eumetopias	jubatus	-0.279998	-0.301266	-0.38964	-0.434727	-0.214686	-0.353741	-0.249771	-0.352906	-0.452959	-0.479618	-0.257125	-0.412274	-0.286453	-0.255137	-0.337959	-0.385349	-0.176776	-0.305966	-0.209422
Phoca	sp.	-0.957398	-0.915056	-0.915333	-0.816221	-0.992239	-1.08045	-0.814858	-0.929886	-0.937184	-0.828422	-1.00443	-1.10064	-0.824828	-0.831474	-0.824279	-0.734862	-0.923548	-0.996274	-0.748376
Equus	ferus caballus	-0.450983	-0.534078	-0.63454	-0.645148	-0.528147	-0.746308	-0.74424	-0.386891	-0.488303	-0.510741	-0.407184	-0.611124	-0.634412	-0.413703	-0.503762	-0.529096	-0.429219	-0.625415	-0.64941
Rhinoceros	sondaicus	-0.430082	-0.437019	-0.534711	-0.556993	-0.475391	-0.630335	-0.776438	-0.386399	-0.492415	-0.509259	-0.433789	-0.591236	-0.737433	-0.37793	-0.468828	-0.49474	-0.426829	-0.569432	-0.725569
Tapirus	terrestris	-0.389151	-0.456001	-0.537211	-0.64248	-0.418782	-0.53036	-0.678335	-0.375926	-0.460562	-0.568809	-0.352974	-0.459504	-0.618136	-0.335491	-0.406434	-0.52676	-0.319743	-0.409467	-0.583775
Lama	guanicoe	-0.62185	-0.678609	-0.65072	-0.649358	-0.599905	-0.61938	-0.425907	-0.650779	-0.628179	-0.622981	-0.577033	-0.598542	-0.404353	-0.668081	-0.637836	-0.634676	-0.591252	-0.607469	-0.41391
Vicugna	pacos	-0.607459	-0.684049	-0.675648	-0.678081	-0.603217	-0.595547	-0.439613	-0.623745	-0.617942	-0.622596	-0.553656	-0.542203	-0.394274	-0.640634	-0.627846	-0.634236	-0.567536	-0.551358	-0.403786
Doliochoerus	quercyi	-0.793892	-0.829334	-0.890693	-0.749047	-0.806398	-1.05519	-0.745114	-0.777327	-0.8391	-0.701541	-0.763656	-1.00749	-0.706294	-0.836961	-0.898174	-0.753879	-0.812666	-1.0621	-0.749061
Tayassu	pecari	-0.450942	-0.510226	-0.598052	-0.609745	-0.43062	-0.581423	-0.594431	-0.467018	-0.557409	-0.569857	-0.395111	-0.543852	-0.561838	-0.53983	-0.628637	-0.63334	-0.45495	-0.609696	-0.613712
Babyrousa	babyrussa	-0.511885	-0.547826	-0.615462	-0.606307	-0.512573	-0.665937	-0.692541	-0.506201	-0.578217	-0.56752	-0.478364	-0.631508	-0.660847	-0.56855	-0.636109	-0.620435	-0.529604	-0.685024	-0.704086
Sus	scrofa domesticus	-0.515949	-0.639677	-0.75	-0.673719	-0.523267	-0.764901	-0.594992	-0.512695	-0.622587	-0.557998	-0.418909	-0.647118	-0.500432	-0.621849	-0.729591	-0.653271	-0.508615	-0.746034	-0.578283
Hylochoerus	meinertzhageni	-0.393412	-0.477156	-0.607302	-0.573229	-0.368911	-0.613644	-0.538043	-0.400848	-0.534829	-0.502916	-0.306199	-0.546649	-0.480587	-0.587295	-0.723435	-0.668373	-0.459427	-0.720999	-0.615788
Potamochoerus	porcus	-0.378095	-0.501874	-0.620523	-0.560588	-0.424426	-0.634976	-0.486736	-0.335367	-0.452125	-0.409097	-0.287584	-0.479306	-0.362947	-0.472357	-0.587514	-0.529178	-0.400168	-0.604462	-0.46107
Phacochoerus	aethiopicus	-0.359623	-0.472838	-0.522652	-0.500542	-0.381525	-0.425357	-0.381244	-0.326925	-0.37583	-0.367646	-0.261608	-0.289633	-0.27265	-0.568588	-0.623761	-0.58372	-0.460215	-0.518824	-0.449212
Tursiops	truncatus	-0.290798	-0.239391	-0.199635	-0.29464	-0.537981	-0.492007	-0.246356	-0.0585148	-0.0176644	-0.129895	-0.389331	-0.323791	-0.111736	-0.0309705	0.0252946	-0.098413	-0.366694	-0.284079	-0.0860106
Hippopotamus	amphibius	-0.476964	-0.564493	-0.668315	-0.664035	-0.472507	-0.711495	-0.544925	-0.487544	-0.597836	-0.592641	-0.409268	-0.646343	-0.486586	-0.521268	-0.619578	-0.616799	-0.436983	-0.666442	-0.506327
Choeropsis	liberiensis	-0.762705	-0.706476	-0.629073	-0.731199	-0.824166	-0.744784	-0.823271	-0.699475	-0.629336	-0.723446	-0.818413	-0.745028	-0.816936	-0.687385	-0.60677	-0.707897	-0.808477	-0.724167	-0.80423
Diplobune	minor	-0.432808	-0.521702	-0.54137	-0.618249	-0.412606	-0.416292	-0.53103	-0.465766	-0.486277	-0.567078	-0.366635	-0.365363	-0.489216	-0.47609	-0.491696	-0.573897	-0.37512	-0.370372	-0.494789
Bachitherium	sp.	-0.543744	-0.587093	-0.567076	-0.629991	-0.560063	-0.579109	-0.635115	-0.534921	-0.516456	-0.58212	-0.517186	-0.532315	-0.595998	-0.548896	-0.525211	-0.592012	-0.528671	-0.540408	-0.604081
Moschiola	meminna	-0.403885	-0.513848	-0.601442	-0.679585	-0.286677	-0.478957	-0.578081	-0.526302	-0.615479	-0.690645	-0.296912	-0.491932	-0.587119	-0.534882	-0.623717	-0.698053	-0.303964	-0.499548	-0.593172
Rangifer	tarandus	-0.4505	-0.562989	-0.660005	-0.730936	-0.467452	-0.667857	-0.74703	-0.442465	-0.540025	-0.620921	-0.368401	-0.556946	-0.657132	-0.505515	-0.596977	-0.673689	-0.420218	-0.609594	-0.700251
Giraffa	camelopardalis antiquorum	-0.373862	-0.49115	-0.531817	-0.559998	-0.383374	-0.543936	-0.494302	-0.380841	-0.426085	-0.458537	-0.292717	-0.446195	-0.411394	-0.404569	-0.436747	-0.473374	-0.312219	-0.456052	-0.423517
Bos	primigenius taurus	-0.574552	-0.637848	-0.700501	-0.781572	-0.613961	-0.724033	-0.786195	-0.549117	-0.615617	-0.699927	-0.541039	-0.645565	-0.71948	-0.532264	-0.585506	-0.67888	-0.527189	-0.617729	-0.702282
Etroplus	maculatus	-1.28163	-1.3444	-1.44005	-1.23249	-1.28641	-1.84206	-0.823086	-1.27325	-1.3534	-1.17053	-1.22794	-1.76195	-0.772458	-1.33272	-1.43055	-1.23122	-1.27681	-1.83327	-0.822054
Poecilia	sphenops	-1.34432	-1.33854	-1.44935	-1.08095	-1.49561	-1.77212	-0.940447	-1.19441	-1.28423	-0.953474	-1.37717	-1.61948	-0.83628	-1.23757	-1.34477	-0.999644	-1.41263	-1.67544	-0.874007
Steatocranus	tinanti	-1.1224	-0.918721	-1.10355	-0.877352	-1.17961	-1.20558	-0.998059	-1.01488	-1.19757	-0.965453	-1.25864	-1.29249	-1.07005	-1.11307	-1.31326	-1.06022	-1.33933	-1.39944	-1.14748
Opsanus	tau	-1.34464	-1.47195	-1.63304	-1.42275	-1.58173	-1.89432	-1.25103	-1.15621	-1.30182	-1.13773	-1.32224	-1.58813	-1.01813	-1.06466	-1.19719	-1.05088	-1.24701	-1.49142	-0.947162
Leuciscus	leuciscus	-1.2028	-1.26361	-1.32136	-1.13585	-1.1192	-1.16394	-0.735668	-1.292	-1.34531	-1.16257	-1.14253	-1.18607	-0.757503	-1.27824	-1.33843	-1.15365	-1.13122	-1.17971	-0.750208
Tinca	tinca	-1.30342	-1.34341	-1.39736	-1.22309	-1.36267	-1.39753	-0.985884	-1.25475	-1.30034	-1.14381	-1.2898	-1.30784	-0.921096	-1.26182	-1.31105	-1.15174	-1.29561	-1.31774	-0.927581
Merluccius	merluccius	-0.937724	-1.19614	-1.21186	-1.10199	-0.894666	-0.743661	-0.383376	-1.02947	-1.03605	-0.951716	-0.757692	-0.581142	-0.260584	-1.01785	-1.02132	-0.940013	-0.748136	-0.567524	-0.251021
Perca	fluviatilis	-1.03296	-1.28632	-1.36278	-1.03986	-0.819304	-1.08223	-0.407422	-1.27344	-1.34616	-1.02882	-0.808718	-1.06686	-0.398401	-1.27528	-1.35173	-1.03219	-0.810229	-1.07202	-0.40115
Molva	dypterygia	-1.59323	-1.63837	-1.64414	-1.37048	-1.77658	-1.6047	-0.912038	-1.4451	-1.44262	-1.19578	-1.61775	-1.41842	-0.769287	-1.38058	-1.36796	-1.13414	-1.56472	-1.3494	-0.718919
Brama	brama	-0.926227	-1.04669	-1.11096	-1.00837	-0.836169	-0.928004	-0.566262	-1.03009	-1.09246	-0.993586	-0.822522	-0.910902	-0.554181	-1.026	-1.08908	-0.99031	-0.819162	-0.907779	-0.551505
Microstomus	kitt	-1.05027	-1.0036	-1.07899	-1.02088	-0.94113	-1.05933	-0.788567	-1.13678	-1.21576	-1.14165	-1.05058	-1.18576	-0.887253	-1.15268	-1.23923	-1.1592	-1.06365	-1.20745	-0.901597
Scomber	scombrus	-1.00224	-1.24038	-1.3102	-1.11514	-0.804783	-1.15758	-0.64656	-1.22388	-1.28983	-1.10082	-0.791224	-1.13874	-0.634863	-1.22189	-1.29117	-1.10062	-0.789588	-1.13998	-0.634699
Conger	conger	-1.44159	-1.43129	-1.46599	-1.24466	-1.53618	-1.58708	-1.09808	-1.35635	-1.38755	-1.17698	-1.4746	-1.51456	-1.04278	-1.32649	-1.35379	-1.14883	-1.45005	-1.48336	-1.01977
Esox	lucius	-1.26735	-1.36288	-1.40935	-1.2659	-1.3156	-1.2212	-0.909753	-1.23284	-1.27195	-1.14869	-1.20872	-1.0942	-0.813975	-1.2997	-1.34203	-1.20916	-1.26367	-1.15898	-0.86339
Reinhardtius	hippoglossoides	-1.32043	-1.28908	-1.35645	-1.09435	-1.48804	-1.58972	-0.906405	-1.16445	-1.22586	-0.981819	-1.38562	-1.46901	-0.814452	-1.12301	-1.1787	-0.9426	-1.35157	-1.42541	-0.782405
Brosme	brosme	-1.41005	-1.40307	-1.41295	-1.17441	-1.51623	-1.3492	-0.72266	-1.32068	-1.32641	-1.10005	-1.44851	-1.2692	-0.661897	-1.27161	-1.27228	-1.05441	-1.40819	-1.21916	-0.624604
Melamphaes	laeviceps	-1.37274	-1.45701	-1.60234	-1.26589	-1.39928	-1.76654	-1.02998	-1.35827	-1.49088	-1.17825	-1.31814	-1.6635	-0.958366	-1.35651	-1.49674	-1.18025	-1.31669	-1.66892	-0.96
Poromitra	crassiceps	-1.54623	-1.5617	-1.69086	-1.28367	-1.62091	-1.74444	-0.79537	-1.47656	-1.59368	-1.2083	-1.55094	-1.6546	-0.733781	-1.48773	-1.61366	-1.22226	-1.56012	-1.67307	-0.745191
Scopelogadus	mizolepis bispinosus	-1.56791	-1.49213	-1.16057	-1.01161	-1.73518	-0.956158	-0.491972	-1.40531	-1.05988	-0.935053	-1.66383	-0.863079	-0.429414	-1.50236	-1.17395	-1.02859	-1.74359	-0.968535	-0.50585
Antimora	rostrata	-1.66486	-1.53186	-1.51753	-1.45255	-1.90923	-1.62144	-1.30849	-1.41956	-1.39859	-1.35139	-1.81694	-1.5115	-1.22582	-1.41818	-1.39616	-1.34968	-1.8158	-1.50925	-1.22443
Synaphobranchus	kaupii	-1.78317	-1.5383	-1.57257	-1.33368	-2.05472	-2.32047	-1.30493	-1.483	-1.51117	-1.2844	-2.00927	-2.2637	-1.26466	-1.49593	-1.52809	-1.29766	-2.0199	-2.27934	-1.2755
Histiobranchus	bathybius	-1.52928	-1.43412	-1.42215	-1.33977	-1.74581	-1.75599	-1.56929	-1.32194	-1.30136	-1.23908	-1.65361	-1.64433	-1.48702	-1.25445	-1.23061	-1.17804	-1.59815	-1.57893	-1.43714
Polyacanthonotus	challengeri	-2.24611	-1.74885	-1.75155	-1.5265	-2.76259	-2.32164	-1.88294	-1.68053	-1.67612	-1.46554	-2.70644	-2.25192	-1.83313	-1.70875	-1.70959	-1.49288	-2.72963	-2.28285	-1.85546
Halosauropsis	macrochir	-1.89821	-1.69135	-1.94816	-1.68283	-2.15625	-2.4667	-1.95318	-1.6047	-1.85309	-1.60539	-2.08503	-2.37882	-1.8899	-1.67099	-1.92745	-1.66763	-2.13951	-2.44756	-1.94075
Chimaera	monstrosa	-1.62898	-1.57591	-1.40666	-1.32302	-1.81004	-1.42241	-1.19956	-1.45634	-1.28218	-1.21492	-1.71178	-1.30734	-1.11122	-1.49709	-1.32213	-1.25048	-1.74526	-1.34427	-1.14028
Squalus	acanthias	-1.28874	-1.33202	-1.28651	-1.22369	-1.40577	-1.19199	-1.07158	-1.19573	-1.14506	-1.10037	-1.29376	-1.06124	-0.970813	-1.17752	-1.12081	-1.08149	-1.27879	-1.03882	-0.955387
Dipturus	batis	-1.50225	-1.51959	-1.48061	-1.46281	-1.71568	-1.61711	-1.60326	-1.29738	-1.25064	-1.26162	-1.53306	-1.40452	-1.43887	-1.4035	-1.35572	-1.35473	-1.62027	-1.50165	-1.51495
Aetobatus	narinari	-1.03167	-1.1264	-0.97514	-1.18025	-1.05311	-0.524151	-1.20715	-1.04351	-0.890309	-1.10502	-0.98498	-0.445732	-1.14568	-1.00786	-0.847754	-1.07036	-0.955683	-0.406394	-1.11735
Hemitrygon	fluviorum	-1.19618	-1.29302	-1.07778	-1.18394	-1.24192	-0.665037	-1.18136	-1.18639	-0.969881	-1.08695	-1.15429	-0.565297	-1.1021	-1.16813	-0.943168	-1.0669	-1.13928	-0.540604	-1.08572
Neotrygon	kuhlii	-0.863279	-1.04548	-1.05146	-0.915115	-0.979472	-0.917166	-0.781656	-0.799948	-0.793817	-0.693485	-0.777685	-0.678993	-0.600554	-0.740544	-0.725168	-0.636779	-0.728864	-0.615534	-0.554217
Pateobatis	fai	-0.855846	-1.05274	-1.04452	-1.12312	-0.770376	-0.59936	-1.06877	-0.981725	-0.972856	-1.05849	-0.712014	-0.533111	-1.01595	-0.918272	-0.899904	-0.99809	-0.659867	-0.465673	-0.966598
Urolophus	paucimaculatus	-1.22309	-1.27489	-1.17338	-1.11188	-1.42744	-1.025	-1.14917	-1.05449	-0.940602	-0.913215	-1.24631	-0.809821	-0.986832	-1.04065	-0.923134	-0.899318	-1.23494	-0.793673	-0.975477
Gymnura	micrura	-0.584935	-1.00604	-0.997909	-0.921573	-0.575258	-0.482294	-0.524062	-0.679304	-0.657077	-0.626262	-0.306734	-0.167224	-0.282751	-0.644836	-0.61094	-0.590419	-0.278408	-0.124574	-0.253463
Carcharhinus	leucas	-1.56086	-1.54462	-1.3959	-1.31478	-1.74858	-1.0903	-1.55026	-1.40896	-1.25482	-1.19208	-1.63709	-0.959886	-1.45	-1.32089	-1.15615	-1.10946	-1.56471	-0.868667	-1.38249
Carcharhinus	plumbeus	-1.44286	-1.34503	-1.2217	-1.38717	-1.6191	-0.891602	-1.14334	-1.28067	-1.15555	-1.32882	-1.56621	-0.830449	-1.09567	-1.22583	-1.09379	-1.27722	-1.52114	-0.773355	-1.0535
Carcharhinus	obscurus	-0.627783	-0.940339	-1.10479	-1.1409	-0.480258	-0.473957	-0.573076	-0.825462	-0.987066	-1.03667	-0.385848	-0.365127	-0.48791	-0.769786	-0.921584	-0.982993	-0.340092	-0.304594	-0.444046
Negaprion	acutidens	-1.22281	-1.30524	-1.21567	-1.18787	-1.51243	-1.04173	-0.928527	-0.995715	-0.892787	-0.908113	-1.25805	-0.743256	-0.699928	-0.878081	-0.758085	-0.796399	-1.16138	-0.618736	-0.608642
Orectolobus	maculatus	-1.28684	-1.26179	-1.07738	-1.32039	-1.43093	-0.615783	-1.21595	-1.16541	-0.979228	-1.23283	-1.35172	-0.525049	-1.1444	-1.1452	-0.95189	-1.21168	-1.33511	-0.499778	-1.12712
Rhizoprionodon	taylori	-1.02493	-1.27483	-1.19336	-1.39598	-0.937948	-0.518165	-0.857167	-1.16145	-1.07344	-1.29382	-0.844769	-0.407312	-0.773684	-1.13477	-1.04372	-1.26886	-0.822841	-0.379836	-0.753295
Chiloscyllium	punctatum	-0.850722	-0.958755	-1.00874	-0.863549	-0.812696	-0.835833	-0.579937	-0.902109	-0.949608	-0.812359	-0.766142	-0.781167	-0.538107	-0.925728	-0.973354	-0.833251	-0.785553	-0.803119	-0.555179
Heterodontus	portusjacksoni	-1.0382	-1.11587	-1.12038	-1.09776	-1.0487	-0.734001	-0.855888	-1.03928	-1.04287	-1.02808	-0.985756	-0.662358	-0.798951	-1.09682	-1.09934	-1.07833	-1.03305	-0.714553	-0.840012
Glaucostegus	typus	-1.0576	-1.31199	-1.38945	-1.41719	-1.15948	-1.20204	-1.31226	-0.995742	-1.06049	-1.13119	-0.899576	-0.897934	-1.07855	-1.097	-1.15883	-1.21914	-0.982794	-0.988843	-1.15042
Callorhinchus	milii	-1.18038	-1.25402	-0.986033	-0.898005	-1.29401	-0.674708	-0.523779	-1.08071	-0.806038	-0.741216	-1.15158	-0.508317	-0.395661	-1.25719	-0.989134	-0.899964	-1.29663	-0.677575	-0.52538
TMI	: Thermo-motility index
w2	: Upper corner frequency
Gv	: Sensitivity
_a	: Anterior semicircular duct
_p	: Posterior semicircular duct
_l	: Lateral semicircular duct
CBL	: Condylobasal length
CAOL	: Condylo-anteroorbital length
BM	: Body mass

## Sheet: PSLR Estimations of Fossils
Cross-validated coefficients of determination (and number of components) of the PLS regressions used to predict missing parameters of fossil specimens.
Specimen	Maj_a_B	Min_a_B	Maj_p_B	Min_p_B	Maj_l_B	Min_l_B	LS_a_B	LS_p_B	LS_l_B	dS_a_B	dS_p_B	dS_l_B
FMNH UR 161	0.93 (3)	0.91 (3)	0.93 (1)	0.93 (1)			0.86 (1)	0.93 (1)		0.73 (2)	0.71 (2)	0.75 (2)
BPI/1/375	0.84 (1)	0.80 (2)	0.85 (2)	0.83 (2)	0.83 (1)	0.83 (2)	0.78 (2)	0.83 (2)	0.81 (2)			0.96 (2)
MCZ 1161			0.95 (4)	0.93 (2)	0.93 (4)	0.91 (1)		0.95 (3)	0.92 (3)		0.97 (3)	0.94 (2)
NHCC LB631	0.98 (5)	0.95 (6)								0.97 (4)
NHCC LB178			0.95 (4)	0.93 (2)	0.93 (4)	0.91 (1)		0.95 (3)	0.92 (3)		0.97 (3)	0.94 (2)
GPIT/RE/7119	0.92 (1)	0.90 (2)			0.93 (3)	0.95 (3)	0.86 (3)	0.95 (3)	0.91 (3)	0.97 (2)		0.95 (2)
NHCC LB387			0.95 (4)	0.93 (2)	0.93 (4)	0.91 (1)		0.95 (3)	0.92 (3)		0.97 (3)	0.94 (2)
Predicted values and 95% confidence intervals
Specimen	Maj_a_B (mm)	Min_a_B (mm)	Maj_p_B (mm)	Min_p_B (mm)	Maj_l_B (mm)	Min_l_B (mm)	LS_a_B (mm)	LS_p_B (mm)	LS_l_B (mm)	dS_a_B (mm)	dS_p_B (mm)	dS_l_B (mm)
FMNH UR 161	3.69	2.92	3.26	2.98			11.48	13.04		0.72	0.76	0.87
	[3.18-4.27]	[2.56-3.32]	[2.86-3.72]	[2.73-3.24]			[9.89-13.32]	[11.99-14.17]		[0.61-0.85]	[0.65-0.90]	[0.74-1.01]
BPI/1/375	2.76	1.58	2	1.61	2.3	1.76	7.75	6.44	10.27			0.62
	[2.36-3.23]	[1.37-1.82]	[1.70-2.35]	[1.40-1.87]	[2.00-2.63]	[1.52-2.03]	[6.49-9.26]	[5.59-7.43]	[8.90-11.85]			[0.57-0.68]
MCZ 1161			3.01	2.11	3.56	2.64		11.31	15.37		0.71	0.85
			[2.72-3.32]	[1.82-2.45]	[3.17-3.99]	[2.32-3.02]		[10.22-12.51]	[13.46-17.56]		[0.65-0.78]	[0.76-0.97]
NHCC LB631	9.11	5.07								1.39
	[8.84-9.39]	[4.88-5.28]								[1.32-1.47]
NHCC LB178			5.82	2.72	4.71	3.29		14.98	17.58		1.06	1.14
			[5.51-6.15]	[2.55-2.90]	[4.46-4.97]	[3.08-3.52]		[14.35-15.63]	[16.42-18.82]		[1.01-1.11]	[1.08-1.21]
GPIT/RE/7119	3.79	2.58			2.57	1.92	10.93	8.22	9.5	0.64		0.64
	[3.57-4.03]	[2.36-2.82]			[2.43-2.73]	[1.81-2.03]	[10.33-11.58]	[7.86-8.59]	[9.03-10.01]	[0.62-0.67]		[0.61-0.68]
NHCC LB387			3.1	2.06	3.09	2.53		10.03	12.5		0.78	0.83
			[2.96-3.24]	[1.95-2.18]	[2.94-3.25]	[2.33-2.74]		[9.62-10.46]	[11.96-13.07]		[0.74-0.82]	[0.79-0.87]

## Sheet: PLS Regressions 2D set
Set 1					Set 2					Set 3					Set 4					Set 5
Min_l_B	adjCV		R2		Min_p_B	adjCV		R2		Min_p_B	adjCV		R2		Min_l_B	adjCV		R2		LS_p_B	adjCV		R2
(Intercept)	0.4424	4.88948			(Intercept)	0.4878	10.8811			(Intercept)	0.4878	10.0453			(Intercept)	0.4424	5.23055			(Intercept)	0.5409	5.63731
1	0.1179	1.30305			1	0.04886	1.0899			1	0.04856	1	0.99		1	0.09788	1.15725			1	0.09839	1.02543	0.97
2	0.09565	1.05714			2	0.04647	1.03658	0.99		2	0.05069	1.04386			2	0.08458	1	0.97		2	0.09595	1
3	0.09048	1	0.94		3	0.04483	1			3	0.05242	1.07949			3	0.08539	1.00958			3	0.1032	1.07556
4	0.09139	1.01006			4	0.05385	1.2012			4	0.06174	1.27142				0.08458				4	0.1041	1.08494
5	0.09612	1.06233			5	0.05738	1.27995			5	0.05949	1.22508								5	0.1051	1.09536
6	0.1007	1.11295			6	0.06075	1.35512			6	0.05818	1.19811			ASD_l	adjCV		R2		6	0.1084	1.12976
7	0.1066	1.17816				0.04483				7	0.06	1.23558			(Intercept)	0.944	10.4494			7	0.1401	1.46014
8	0.1135	1.25442								8	0.06231	1.28315			1	0.1388	1.53642			8	0.1636	1.70505
9	0.1328	1.46773			Min_l_B	adjCV		R2		9	0.08792	1.81054			2	0.1013	1.12132			9	0.1761	1.83533
	0.09048				(Intercept)	0.4424	5.24668			10	0.09602	1.97735			3	0.09034	1	0.99		10	0.1816	1.89265
					1	0.1218	1.4445				0.04856					0.09034				11	0.1926	2.0073
LS_l_B	adjCV		R2		2	0.096	1.13852														0.09595
(Intercept)	0.4707	7.74942			3	0.08639	1.02455	0.97
1	0.09669	1.59187			4	0.08432	1
2	0.07455	1.22736			5	0.08652	1.02609
3	0.06989	1.15064			6	0.08782	1.04151			Highlighted cells show the number of components that were used to predict morphological parameters within each set and corresponding cross-validated coefficient of determination.
4	0.08062	1.3273				0.08432				More information about the different sets is provided in the R script uplaoded on Zenodo.org
5	0.07386	1.216
6	0.06074	1	0.99		LS_p_B	adjCV		R2
7	0.06074	1			(Intercept)	0.5409	5.61682
8	0.07422	1.22193			1	0.0963	1	0.97
9	0.07935	1.30639			2	0.1022	1.06127
	0.06074				3	0.1025	1.06438
					4	0.1036	1.0758
ASD_l	adjCV		R2		5	0.1024	1.06334
(Intercept)	0.944	8.68445			6	0.1029	1.06854
1	0.1996	1.83625				0.0963
2	0.1218	1.12052
3	0.1206	1.10948			LS_l_B	adjCV		R2
4	0.1154	1.06164			(Intercept)	0.4707	8.0434
5	0.1194	1.09844			1	0.09842	1.68182
6	0.1087	1	0.99		2	0.07026	1.20062
7	0.1134	1.04324			3	0.05852	1	0.99
8	0.1293	1.18951			4	0.05892	1.00684
9	0.13	1.19595			5	0.0598	1.02187
	0.1087				6	0.06204	1.06015
						0.05852
					ASD_p	adjCV		R2
					(Intercept)	0.9425	11.6632
					1	0.0873	1.08031
					2	0.08514	1.05358
					3	0.09911	1.22646
					4	0.08081	1	1
					5	0.09254	1.14516
					6	0.1003	1.24118
						0.08081
					ASD_l	adjCV		R2
					(Intercept)	0.944	9.42116
					1	0.2029	2.02495
					2	0.1107	1.10479
					3	0.1118	1.11577
					4	0.1002	1	0.99
					5	0.1031	1.02894
					6	0.1064	1.06188
						0.1002

## Sheet: Regresssions for common length
		Common body length (cm)	Max body length (cm)
Squalus	acanthias	94.4	140
Etmopterus	spinax	45	60
Squatina	squatina	150	213.5
Chlamydoselachus	anguineus	132	200
Hexanchus	griseus	300	482
Scyliorhinus	canicula	60	100
Galeus	melastomus	50	82.5
Galeorhinus	galeus	160	194
Lamna	nasus	244	350
Carcharodon	carcharias	475	640
Alopias	vulpinus	450	573
Cetorhinus	maximus	700	1250
Rhincodon	typus	957.58	1850
Dipturus	batis	100	285
Raja	clavata	85	122
Torpedo	torpedo	35	50
Torpedo	marmorata	60	100		Regression used to predict the common body length of chondrichtyans
Heterodontus	japonicus	100	120
Echinorhinus	brucus	227	310
Somniosus	microcephalus	335.5	488.5
Acipenser	sturio	125	600
Lepisosteus	osseus	66.9	200
Amia	calva	53.4	109
Perca	fluviatilis	25	60
Sander	lucioperca	50	100
Mullus	barbatus	20	33.2
Pagellus	bogaraveo	30	70
Scomber	scomber	30	60
Zeus	faber	40	90
Trachinus	draco	25	53
Lophius	piscatorius	100	200
Trigla	gurnardus	30	60
Cyclopterus	lumpus	42.9	61
Gobius	niger	12	18
Callionymus	lyra	15	27.5
Anarhichas	lupus	55	150
Labrus	mixtus	30	35		Regression used to predict the common body length of actinopterygians
Belone	belone	45	104
Gadus	morrhua	100	200
Raniceps	raninus	20	30
Solea	solea	35	70
Silurus	glanis	300	500
Leuciscus	idus	30	85
Salmo	salar	38	135
Clupea	harengus	30	45
Esox	lucius	47	143.5
Anguilla	anguilla	42	127
Lactoria	cornuta	40	46
Exocoetus	volitans	20	30
