# Supplementary material for: Inner ear biomechanics reveals Late Triassic origin of mammalian endothermy
Source: Research Square preprint supplement (doi:10.21203/rs.3.rs-570966/v1), 2021-06-02
Supplement: Supplementary file 5 [file 3218a91889b7735ffae58b4d.xlsx]

## Sheet: Data
Ecto vs Endo	Species	Breed	Activity	MaxOBDA (g)	Reference	Notes
Endotherm	Ovis aries	Corriedale sheep	graze or ruminate	0.184	Mikwa et al 2015
Endotherm	Ovis aries		grazing	0.22	Wilson et al. 2018
Endotherm	Bos taurus	Japanese black cow	graze or ruminate	0.184	Mikwa et al 2015					0.086
Endotherm	Capra aegagrus hircus	Saanen goat	graze or ruminate	0.169	Mikwa et al 2015					0.07
Endotherm	Cairina moschata	Muscovy duck	range of active behaviors	0.783	Halsey et al. 2009					0.1
Endotherm	Myocastor coypus		range of active behaviors	0.799	Halsey et al. 2009					0.2
Endotherm	Eudyptes chrysocome		range of active behaviors	0.822	Halsey et al. 2009					0.2
Endotherm	Homo sapiens		range of active behaviors	2	Halsey et al. 2008		Halsey, L., Shepard, E., Hulston, C., Venables, M., White, C., Jeukendrup, A., Wilson, R.,2008. Acceleration versus heart rate for estimating energy expenditure and speedduring locomotion in animals: tests with an easy model species, Homo sapiens.Zoology 111, 231–241.			0.06
Endotherm	Phalacrocorax carbo		range of active behaviors	1.011	Halsey et al. 2009					0.075
Endotherm	Spheniscus magellanicus		range of active behaviors	1.167	Halsey et al. 2009
Endotherm	Chaetophractus villosus		range of active behaviors	0.701	Halsey et al. 2009
Endotherm	Bos taurus	Japanese brown cow	graze or ruminate	0.154	Mikwa et al 2015
Endotherm	Anser anser	Greylag goose	range of active behaviors	0.712	Halsey et al. 2009
Endotherm	Conepatus chinga		range of active behaviors	1.099	Halsey et al. 2009
Endotherm	Gallus gallus domesticus	Bantam chicken	range of active behaviors	0.634	Halsey et al. 2009
Endotherm	Mirounga leonina		continuous swimming	0.2	Gleiss et al. 2011
Endotherm	Castor fiber		diving	0.3	Wilson et al. 2018
Endotherm	Meles meles		trotting	0.574	Wilson et al. 2018	data available for sleeping and walking too
Endotherm	Leontopithecus rosalia		travelling	0.565	Wilson et al. 2018
Endotherm	Oryx leucoryx		walking	0.214	Wilson et al. 2018	data available for grazing too
Endotherm	Phalacrocorax atriceps		flying	0.877	Wilson et al. 2018	also for washing, diving and resting
Endotherm	Spheniscus magellanicus		Washing	1.44	Wilson et al. 2018	also for walking and diving
Endotherm	Mephitis mephitis		during lactation	0.5	Zhang et al. 2019	also for torpor, mating, fattening or dispersal
Endotherm	Callorhinus ursinus		surface movement during lactation	0.649	Jeanniard‐du‐Dot et al 2017	also for diving, transiting, resting
Endotherm	Arctocephalus gazella		surface movement during lactation	0.884	Jeanniard‐du‐Dot et al 2017	also for diving, transiting, resting
Ectotherm	Bufo marinus		field measurements	0.086	Halsey and White 2010	n=8 mean field T = 17C
Ectotherm	Caretta caretta		reproduction	0.07	Fossette et al. 2012	n=6 mean field T = 22C
Ectotherm	Caretta caretta		resting	0.1	Wilson et al. 2018	also for swimming which is lower
Ectotherm	Negaprion brevirostris		steady swimming, initiation of swimming	0.2	Gleiss 2009	fast start can reach 1
Ectotherm	Dermochelys coriacea		diving	0.2	Fossette et al. 2010	PDBDyz
Ectotherm	Salvator merianae		reproduction	0.06	Zena et al. 2020
Ectotherm	Terrapene carolina		year round	0.075	Parlin et al 2018
Ectotherm	Sphyrna lewini		range of active behaviors	0.124	Halsey et al. 2011	Data for hammerhead sharks and cane toads are Q10-corrected to 37 °C for a more direct comparison to the other (endothermic) species.

## Sheet: 2 samples t test
	XLSTAT 2018.1.1.62926 - Two-sample t-test and z-test - Start time: 10/02/2021 at 10:34:05 / End time: 10/02/2021 at 10:34:06 / Microsoft Excel 16.04266
	Sample 1: Workbook = obda.xlsx / Sheet = Sheet1 / Range = Sheet1!$E$2:$E$26 / 25 rows and 1 column
	Sample 2: Workbook = obda.xlsx / Sheet = Sheet1 / Range = Sheet1!$K$4:$K$10 / 7 rows and 1 column
	Hypothesized difference (D): 0
	Significance level (%): 5
	Population variances for the t-test: Assume equality
	:
	Summary statistics:
	Variable	Observations	Obs. with missing data	Obs. without missing data	Minimum	Maximum	Mean	Std. deviation
	Var1	25	0	25	0.154	2	0.67368	0.450067
	Var1	7	0	7	0.06	0.2	0.113	0.0607426
	t-test for two independent samples / Two-tailed test:
	95% confidence interval on the difference between the means:
	0.208327	0.913033
	Difference	0.56068
	t (Observed value)	3.24976
	|t| (Critical value)	2.04227
	DF	30
	p-value (Two-tailed)	0.00284784
	alpha	0.05
	Test interpretation:
	H0: The difference between the means is equal to 0.
	Ha: The difference between the means is different from 0.
	As the computed p-value is lower than the significance level alpha=0,05, one should reject the null hypothesis H0, and accept the alternative hypothesis Ha.

## Sheet: Mann-Whitney
	XLSTAT 2018.1.1.62926 - Comparison of two samples (Wilcoxon, Mann-Whitney, ...) - Start time: 10/02/2021 at 10:32:36 / End time: 10/02/2021 at 10:32:37 / Microsoft Excel 16.04266
	Sample 1: Workbook = obda.xlsx / Sheet = Sheet1 / Range = 'Sheet1'!$E$2:$E$16 / 15 rows and 1 column
	Sample 2: Workbook = obda.xlsx / Sheet = Sheet1 / Range = Sheet1!$K$4:$K$10 / 7 rows and 1 column
	Hypothesized difference (D): 0
	Significance level (%): 5
	p-value: Exact p-value
	:
	Summary statistics:
	Variable	Observations	Obs. with missing data	Obs. without missing data	Minimum	Maximum	Mean	Std. deviation
	Var1	15	0	15	0.154	2	0.709267	0.502976
	Var1	7	0	7	0.06	0.2	0.113	0.0607426
	Mann-Whitney test / Two-tailed test:
	U	97
	U (standardized)	0
	Expected value	52.5
	Variance (U)	201.023
	p-value (Two-tailed)	0.000738812
	alpha	0.05
	The p-value is computed using an exact method. Time elapsed: 0s.
	Test interpretation:
	H0: The difference of location between the samples is equal to 0.
	Ha: The difference of location between the samples is different from 0.
	As the computed p-value is lower than the significance level alpha=0,05, one should reject the null hypothesis H0, and accept the alternative hypothesis Ha.
	Ties have been detected in the data and the appropriate corrections have been applied.
