# Supplementary material for: Inner ear biomechanics reveals Late Triassic origin of mammalian endothermy
Source: Research Square preprint supplement (doi:10.21203/rs.3.rs-570966/v1), 2021-06-02
Supplement: Supplementary file 7 [file 7359e3f697ad2a71a45bee8f.xlsx]

## Sheet: Data
Specimens	Operator	Repetition	diameter ASC	diameter PSC	diameter HSC
FMNH 201350	1	1	0.38	0.42	0.46
FMNH 201350	1	2	0.4	0.4	0.45
FMNH 201350	1	3	0.39	0.42	0.44		n=185
FMNH 201350	1	4	0.43	0.44	0.46
FMNH 201350	1	5	0.42	0.41	0.46
FMNH 250439	1	1	0.16	0.19	0.21
FMNH 250439	1	2	0.21	0.16	0.22
FMNH 250439	1	3	0.2	0.14	0.23
FMNH 250439	1	4	0.2	0.14	0.2
FMNH 250439	1	5	0.18	0.15	0.18
FMNH 165622	1	1	0.27	0.4	0.36
FMNH 165622	1	2	0.35	0.25	0.38
FMNH 165622	1	3	0.29	0.25	0.44
FMNH 165622	1	4	0.31	0.33	0.43
FMNH 165622	1	5	0.31	0.41	0.44
CAS 126478	1	1	0.17	0.13	0.16
CAS 126478	1	2	0.16	0.16	0.2
CAS 126478	1	3	0.15	0.16	0.21
CAS 126478	1	4	0.15	0.17	0.19
CAS 126478	1	5	0.17	0.19	0.19
FMNH 31182	1	1	0.33	0.32	0.31
FMNH 31182	1	2	0.34	0.35	0.28
FMNH 31182	1	3	0.34	0.34	0.56
FMNH 31182	1	4	0.42	0.35	0.4
FMNH 31182	1	5	0.41	0.3	0.38
FMNH 260015	1	1	0.44	0.49	0.57
FMNH 260015	1	2	0.44	0.53	0.56
FMNH 260015	1	3	0.42	0.48	0.53
FMNH 260015	1	4	0.42	0.44	0.58
FMNH 260015	1	5	0.44	0.45	0.56
UMMZ 190285	1	1	0.36	0.37	0.4
UMMZ 190285	1	2	0.35	0.39	0.32
UMMZ 190285	1	3	0.37	0.38	0.38
UMMZ 190285	1	4	0.38	0.32	0.3
UMMZ 190285	1	5	0.37	0.38	0.38
FMNH 47572	1	1	0.32	0.39	0.36
FMNH 47572	1	2	0.35	0.42	0.44
FMNH 47572	1	3	0.43	0.42	0.34
FMNH 47572	1	4	0.47	0.5	0.32
FMNH 47572	1	5	0.46	0.48	0.36
FMNH 71626	1	1	0.31	0.32	0.37
FMNH 71626	1	2	0.25	0.32	0.36
FMNH 71626	1	3	0.34	0.34	0.34
FMNH 71626	1	4	0.34	0.31	0.34
FMNH 71626	1	5	0.33	0.36	0.34
YPM 12670	1	1	0.23	0.28	0.28
YPM 12670	1	2	0.22	0.18	0.27
YPM 12670	1	3	0.21	0.19	0.25
YPM 12670	1	4	0.21	0.19	0.23
YPM 12670	1	5	0.23	0.17	0.23
FMNH 60958	1	1	0.27	0.21	0.25
FMNH 60958	1	2	0.25	0.21	0.23
FMNH 60958	1	3	0.27	0.23	0.2
FMNH 60958	1	4	0.24	0.24	0.29
FMNH 60958	1	5	0.26	0.27	0.29
USNM 128679	1	1	0.13	0.15	0.15
USNM 128679	1	2	0.13	0.14	0.15
USNM 128679	1	3	0.13	0.13	0.15
USNM 128679	1	4	0.13	0.11	0.16
USNM 128679	1	5	0.15	0.13	0.16
FMNH 221322	1	1	0.25	0.3	0.23
FMNH 221322	1	2	0.24	0.28	0.29
FMNH 221322	1	3	0.23	0.25	0.23
FMNH 221322	1	4	0.22	0.32	0.28
FMNH 221322	1	5	0.25	0.3	0.27
CMNH 67524	1	1	0.39	0.27	0.32
CMNH 67524	1	2	0.34	0.27	0.29
CMNH 67524	1	3	0.33	0.26	0.28
CMNH 67524	1	4	0.33	0.3	0.3
CMNH 67524	1	5	0.36	0.29	0.29
FMNH 120968	1	1	0.16	0.16	0.18
FMNH 120968	1	2	0.16	0.16	0.18
FMNH 120968	1	3	0.13	0.17	0.21
FMNH 120968	1	4	0.16	0.17	0.2
FMNH 120968	1	5	0.17	0.18	0.19
FMNH 186818	1	1	0.26	0.28	0.38
FMNH 186818	1	2	0.25	0.26	0.37
FMNH 186818	1	3	0.26	0.26	0.36
FMNH 186818	1	4	0.29	0.25	0.3
FMNH 186818	1	5	0.28	0.24	0.29
TNHC 64380	1	1	0.55	0.58	0.6
TNHC 64380	1	2	0.53	0.6	0.63
TNHC 64380	1	3	0.56	0.63	0.72
TNHC 64380	1	4	0.59	0.56	0.61
TNHC 64380	1	5	0.6	0.48	0.51
YPM 12858	1	1	0.2	0.22	0.24
YPM 12858	1	2	0.19	0.25	0.22
YPM 12858	1	3	0.22	0.25	0.21
YPM 12858	1	4	0.22	0.24	0.26
YPM 12858	1	5	0.26	0.26	0.28
FMNH 148589	1	1	0.36	0.37	0.45
FMNH 148589	1	2	0.32	0.36	0.43
FMNH 148589	1	3	0.33	0.31	0.46
FMNH 148589	1	4	0.41	0.34	0.45
FMNH 148589	1	5	0.39	0.36	0.43
FMNH 202810	1	1	0.4	0.43	0.39
FMNH 202810	1	2	0.4	0.43	0.4
FMNH 202810	1	3	0.4	0.4	0.42
FMNH 202810	1	4	0.41	0.44	0.45
FMNH 202810	1	5	0.43	0.43	0.45
USNM 260564	1	1	0.13	0.19	0.21
USNM 260564	1	2	0.17	0.16	0.21
USNM 260564	1	3	0.14	0.17	0.2
USNM 260564	1	4	0.17	0.17	0.2
USNM 260564	1	5	0.19	0.16	0.19
LACM 136359	1	1	0.2	0.21	0.2
LACM 136359	1	2	0.16	0.17	0.18
LACM 136359	1	3	0.21	0.14	0.18
LACM 136359	1	4	0.22	0.13	0.2
LACM 136359	1	5	0.24	0.16	0.2
MVZ 125659	1	1	0.23	0.18	0.21
MVZ 125659	1	2	0.19	0.13	0.18
MVZ 125659	1	3	0.19	0.14	0.21
MVZ 125659	1	4	0.18	0.16	0.21
MVZ 125659	1	5	0.19	0.16	0.24
USNM 200767	1	1	0.31	0.33	0.3
USNM 200767	1	2	0.34	0.32	0.34
USNM 200767	1	3	0.33	0.32	0.35
USNM 200767	1	4	0.32	0.31	0.38
USNM 200767	1	5	0.38	0.28	0.33
YPM 12870	1	1	0.4	0.37	0.43
YPM 12870	1	2	0.44	0.41	0.4
YPM 12870	1	3	0.46	0.37	0.45
YPM 12870	1	4	0.45	0.32	0.47
YPM 12870	1	5	0.41	0.33	0.44
FMNH 122866	1	1	0.19	0.24	0.21
FMNH 122866	1	2	0.17	0.23	0.21
FMNH 122866	1	3	0.17	0.26	0.22
FMNH 122866	1	4	0.21	0.23	0.23
FMNH 122866	1	5	0.2	0.25	0.25
YPM 9194	1	1	0.46	0.37	0.38
YPM 9194	1	2	0.59	0.32	0.46
YPM 9194	1	3	0.58	0.4	0.44
YPM 9194	1	4	0.45	0.32	0.74
YPM 9194	1	5	0.44	0.3	0.64
CAS 171013	1	1	0.29	0.28	0.31
CAS 171013	1	2	0.33	0.25	0.31
CAS 171013	1	3	0.26	0.28	0.31
CAS 171013	1	4	0.32	0.25	0.31
CAS 171013	1	5	0.33	0.26	0.29
TNHC 64040	1	1	0.31	0.32	0.29
TNHC 64040	1	2	0.33	0.35	0.27
TNHC 64040	1	3	0.33	0.39	0.27
TNHC 64040	1	4	0.38	0.35	0.29
TNHC 64040	1	5	0.34	0.34	0.3
FMNH 22416	1	1	0.38	0.37	0.48
FMNH 22416	1	2	0.36	0.32	0.42
FMNH 22416	1	3	0.35	0.34	0.34
FMNH 22416	1	4	0.33	0.34	0.45
FMNH 22416	1	5	0.45	0.29	0.48
USNM 12378	1	1	0.18	0.22	0.34
USNM 12378	1	2	0.21	0.22	0.33
USNM 12378	1	3	0.21	0.22	0.33
USNM 12378	1	4	0.22	0.21	0.25
USNM 12378	1	5	0.2	0.19	0.23
FMNH 78661	1	1	0.43	0.46	0.58
FMNH 78661	1	2	0.44	0.38	0.5
FMNH 78661	1	3	0.43	0.38	0.52
FMNH 78661	1	4	0.41	0.54	0.55
FMNH 78661	1	5	0.44	0.55	0.56
FMNH 167048	1	1	0.16	0.15	0.18
FMNH 167048	1	2	0.14	0.14	0.18
FMNH 167048	1	3	0.13	0.12	0.19
FMNH 167048	1	4	0.13	0.12	0.15
FMNH 167048	1	5	0.13	0.13	0.17
FMNH 35144	1	1	1.07	0.92	1.03
FMNH 35144	1	2	1	0.92	0.94
FMNH 35144	1	3	0.93	0.92	0.85
FMNH 35144	1	4	0.94	0.85	0.86
FMNH 35144	1	5	0.83	0.86	1.08
FMNH 158613	1	1	0.21	0.23	0.25
FMNH 158613	1	2	0.24	0.24	0.25
FMNH 158613	1	3	0.22	0.22	0.22
FMNH 158613	1	4	0.21	0.24	0.23
FMNH 158613	1	5	0.23	0.23	0.24
FMNH 148900	1	1	0.34	0.16	0.3
FMNH 148900	1	2	0.3	0.2	0.3
FMNH 148900	1	3	0.25	0.22	0.32
FMNH 148900	1	4	0.19	0.18	0.33
FMNH 148900	1	5	0.28	0.18	0.28
1930.5.8.725	1	1	0.47	0.404	0.393
1930.5.8.725	1	2	0.363	0.448	0.473
1930.5.8.725	1	3	0.39	0.43	0.394
1930.5.8.725	1	4	0.542	0.57	0.45
1930.5.8.725	1	5	0.551	0.546	0.452
Brochu 1999 monograph	1	1	1.367	1.8	0.702
Brochu 1999 monograph	1	2	1.204	1.2	0.675
Brochu 1999 monograph	1	3	1.18	1.296	0.761
Brochu 1999 monograph	1	4	1.286	1.348	0.79
Brochu 1999 monograph	1	5	1.086	1.401	0.829
1964.1782	1	1	0.378	0.388	0.379
1964.1782	1	2	0.449	0.401	0.391
1964.1782	1	3	0.395	0.406	0.333
1964.1782	1	4	0.482	0.298	0.319
1964.1782	1	5	0.402	0.384	0.356
1964.179	1	1	0.217	0.223	0.242
1964.179	1	2	0.222	0.208	0.25
1964.179	1	3	0.228	0.249	0.293
1964.179	1	4	0.204	0.2	0.253
1964.179	1	5	0.234	0.218	0.225
FRIM0026; Digimorph	1	1	0.187	0.198	0.218
FRIM0026; Digimorph	1	2	0.194	0.204	0.196
FRIM0026; Digimorph	1	3	0.192	0.195	0.232
FRIM0026; Digimorph	1	4	0.187	0.206	0.186
FRIM0026; Digimorph	1	5	0.192	0.213	0.21
S/1972.1.21	1	1	0.621	0.796	0.731
S/1972.1.21	1	2	0.617	0.723	0.657
S/1972.1.21	1	3	0.64	0.637	0.644
S/1972.1.21	1	4	0.627	0.716	0.66
S/1972.1.21	1	5	0.682	0.736	0.566
S/1987.27.1	1	1	0.542	0.562	0.467
S/1987.27.1	1	2	0.475	0.438	0.472
S/1987.27.1	1	3	0.507	0.472	0.45
S/1987.27.1	1	4	0.441	0.452	0.488
S/1987.27.1	1	5	0.566	0.476	0.623
S/2007.139.12	1	1	1.159	1.142	0.833
S/2007.139.12	1	2	1.136	1.228	1.11
S/2007.139.12	1	3	1.141	1.081	1.099
S/2007.139.12	1	4	1.168	1.046	1.154
S/2007.139.12	1	5	1.176	1.108	1.166
FMNH 73711; Digimorph	1	1	0.648	0.663	1.208
FMNH 73711; Digimorph	1	2	0.8	0.798	1.079
FMNH 73711; Digimorph	1	3	0.83	0.766	0.997
FMNH 73711; Digimorph	1	4	0.846	0.837	0.938
FMNH 73711; Digimorph	1	5	0.896	0.878	0.814
1939.12.9.964	1	1	0.897	0.986	0.934
1939.12.9.964	1	2	0.925	0.885	0.796
1939.12.9.964	1	3	0.906	0.899	0.807
1939.12.9.964	1	4	0.822	1.02	0.996
1939.12.9.964	1	5	0.895	1.107	0.875
1930.5.8.952	1	1	0.34	0.486	0.399
1930.5.8.952	1	2	0.358	0.471	0.347
1930.5.8.952	1	3	0.398	0.428	0.374
1930.5.8.952	1	4	0.427	0.459	0.365
1930.5.8.952	1	5	0.476	0.429	0.406
YPM 12690; Digimorph	1	1	0.184	0.204	0.198
YPM 12690; Digimorph	1	2	0.196	0.197	0.174
YPM 12690; Digimorph	1	3	0.193	0.185	0.174
YPM 12690; Digimorph	1	4	0.191	0.175	0.182
YPM 12690; Digimorph	1	5	0.204	0.154	0.179
1969.2864	1	1	2.217	3.392	2.458
1969.2864	1	2	2.198	3.546	2.298
1969.2864	1	3	2.211	3.44	2.259
1969.2864	1	4	2.217	3.125	2.599
1969.2864	1	5	2.266	2.978	3.106
UF22159; Digimorph	1	1	1.291	0.993	1.125
UF22159; Digimorph	1	2	1.027	0.944	1.279
UF22159; Digimorph	1	3	0.939	0.948	1.162
UF22159; Digimorph	1	4	1.124	1.108	1.357
UF22159; Digimorph	1	5	0.949	1.143	1.411
1859.9.6.393	1	1	0.866	0.798	0.872
1859.9.6.393	1	2	0.851	0.838	0.766
1859.9.6.393	1	3	0.736	0.773	0.872
1859.9.6.393	1	4	0.792	0.81	0.731
1859.9.6.393	1	5	0.687	0.846	0.742
S/1952.1.103	1	1	0.864	0.751	0.773
S/1952.1.103	1	2	0.792	0.721	0.675
S/1952.1.103	1	3	0.802	0.838	0.7
S/1952.1.103	1	4	0.78	0.802	0.916
S/1952.1.103	1	5	0.816	0.854	0.821
S/1979.66.160	1	1	0.732	0.688	0.732
S/1979.66.160	1	2	0.709	0.625	0.682
S/1979.66.160	1	3	0.605	0.653	0.685
S/1979.66.160	1	4	0.716	0.698	0.757
S/1979.66.160	1	5	0.719	0.617	0.659
USNM 547842; Digimorph	1	1	0.156	0.16	0.152
USNM 547842; Digimorph	1	2	0.137	0.163	0.156
USNM 547842; Digimorph	1	3	0.156	0.149	0.149
USNM 547842; Digimorph	1	4	0.157	0.153	0.15
USNM 547842; Digimorph	1	5	0.158	0.172	0.158
FMNH 75662	1	1	0.096	0.107	0.169
FMNH 75662	1	2	0.103	0.127	0.135
FMNH 75662	1	3	0.107	0.135	0.089
FMNH 75662	1	4	0.104	0.108	0.137
FMNH 75662	1	5	0.1	0.11	0.188
FMNH59071	1	1	1.461	1.459	1.764
FMNH59071	1	2	1.354	1.2	1.471
FMNH59071	1	3	1.477	1.965	1.471
FMNH59071	1	4	1.095	1.633	1.764
FMNH59071	1	5	1.441	1.614	1.861
OUVC 10425	1	1	0.509	0.587	0.713
OUVC 10425	1	2	0.794	0.335	0.65
OUVC 10425	1	3	0.518	0.877	0.685
OUVC 10425	1	4	0.518	0.32	0.678
OUVC 10425	1	5	0.384	0.55	0.668
TMM M-4980	1	1	1.045	0.926	1.389
TMM M-4980	1	2	0.933	1.036	1.256
TMM M-4980	1	3	0.891	0.892	1.138
TMM M-4980	1	4	0.827	0.995	1.103
TMM M-4980	1	5	0.852	0.984	1.186
S/1995.11.1	1	1	0.904	0.943	0.897
S/1995.11.1	1	2	0.841	0.818	0.951
S/1995.11.1	1	3	0.921	0.879	0.941
S/1995.11.1	1	4	1.06	0.938	0.856
S/1995.11.1	1	5	1.01	0.881	0.886
S/1969.1.163	1	1	0.413	0.408	0.478
S/1969.1.163	1	2	0.408	0.438	0.448
S/1969.1.163	1	3	0.496	0.403	0.489
S/1969.1.163	1	4	0.417	0.391	0.456
S/1969.1.163	1	5	0.425	0.391	0.437
FMNH 64429; Digimorph	1	1	0.142	0.129	0.191
FMNH 64429; Digimorph	1	2	0.146	0.133	0.163
FMNH 64429; Digimorph	1	3	0.113	0.156	0.169
FMNH 64429; Digimorph	1	4	0.14	0.141	0.16
FMNH 64429; Digimorph	1	5	0.139	0.14	0.167
S/2001.50.1	1	1	0.76	0.832	0.86
S/2001.50.1	1	2	0.766	0.841	0.746
S/2001.50.1	1	3	0.833	0.721	0.751
S/2001.50.1	1	4	0.741	0.857	0.745
S/2001.50.1	1	5	0.791	0.996	0.718
YPM 12668; Digimorph	1	1	0.261	0.371	0.271
YPM 12668; Digimorph	1	2	0.257	0.342	0.312
YPM 12668; Digimorph	1	3	0.27	0.357	0.308
YPM 12668; Digimorph	1	4	0.328	0.26	0.218
YPM 12668; Digimorph	1	5	0.347	0.258	0.288
1792.568	1	1	0.375	0.391	0.353
1792.568	1	2	0.335	0.34	0.349
1792.568	1	3	0.286	0.406	0.322
1792.568	1	4	0.336	0.385	0.313
1792.568	1	5	0.346	0.312	0.319
TMM M-5490; Digimorph	1	1	0.898	0.543	1.164
TMM M-5490; Digimorph	1	2	0.667	0.707	1.092
TMM M-5490; Digimorph	1	3	0.688	0.651	1.083
TMM M-5490; Digimorph	1	4	0.716	0.548	1.188
TMM M-5490; Digimorph	1	5	0.638	0.604	1.221
1983.65	1	1	0.387	0.366	0.376
1983.65	1	2	0.334	0.358	0.399
1983.65	1	3	0.369	0.345	0.38
1983.65	1	4	0.32	0.36	0.304
1983.65	1	5	0.331	0.408	0.329
1964.1829	1	1	0.332	0.263	0.325
1964.1829	1	2	0.31	0.294	0.316
1964.1829	1	3	0.343	0.325	0.33
1964.1829	1	4	0.299	0.35	0.341
1964.1829	1	5	0.324	0.364	0.346
YPM 14379; Digimorph	1	1	0.336	0.406	0.381
YPM 14379; Digimorph	1	2	0.325	0.414	0.375
YPM 14379; Digimorph	1	3	0.384	0.397	0.355
YPM 14379; Digimorph	1	4	0.385	0.433	0.403
YPM 14379; Digimorph	1	5	0.382	0.318	0.431
1978.346	1	1	0.206	0.174	0.183
1978.346	1	2	0.21	0.194	0.185
1978.346	1	3	0.196	0.175	0.198
1978.346	1	4	0.192	0.226	0.207
1978.346	1	5	0.207	0.189	0.222
TNHC 62766; Digimorph	1	1	0.577	0.455	0.409
TNHC 62766; Digimorph	1	2	0.54	0.485	0.459
TNHC 62766; Digimorph	1	3	0.512	0.404	0.501
TNHC 62766; Digimorph	1	4	0.517	0.435	0.497
TNHC 62766; Digimorph	1	5	0.583	0.439	0.587
YPM 14381; Digimorph	1	1	0.391	0.406	0.372
YPM 14381; Digimorph	1	2	0.426	0.397	0.397
YPM 14381; Digimorph	1	3	0.412	0.411	0.361
YPM 14381; Digimorph	1	4	0.466	0.341	0.361
YPM 14381; Digimorph	1	5	0.481	0.34	0.333
YPM 6057; Digimorph	1	1	0.406	0.332	0.413
YPM 6057; Digimorph	1	2	0.421	0.304	0.42
YPM 6057; Digimorph	1	3	0.388	0.308	0.448
YPM 6057; Digimorph	1	4	0.414	0.296	0.457
YPM 6057; Digimorph	1	5	0.452	0.305	0.478
1970.1.20.135	1	1	0.297	0.324	0.325
1970.1.20.135	1	2	0.277	0.295	0.294
1970.1.20.135	1	3	0.249	0.358	0.322
1970.1.20.135	1	4	0.265	0.328	0.317
1970.1.20.135	1	5	0.256	0.362	0.299
S/1968.4.14	1	1	0.321	0.331	0.33
S/1968.4.14	1	2	0.299	0.323	0.322
S/1968.4.14	1	3	0.323	0.372	0.351
S/1968.4.14	1	4	0.324	0.343	0.336
S/1968.4.14	1	5	0.301	0.373	0.349
S/1966.51.59	1	1	0.281	0.283	0.283
S/1966.51.59	1	2	0.271	0.268	0.258
S/1966.51.59	1	3	0.282	0.238	0.279
S/1966.51.59	1	4	0.305	0.266	0.265
S/1966.51.59	1	5	0.327	0.271	0.301
59.9.21.2	1	1	0.388	0.459	0.36
59.9.21.2	1	2	0.398	0.492	0.406
59.9.21.2	1	3	0.373	0.432	0.344
59.9.21.2	1	4	0.436	0.384	0.4
59.9.21.2	1	5	0.491	0.386	0.447
YPM 12868; Digimorph	1	1	0.318	0.386	0.303
YPM 12868; Digimorph	1	2	0.34	0.342	0.299
YPM 12868; Digimorph	1	3	0.324	0.368	0.304
YPM 12868; Digimorph	1	4	0.438	0.357	0.289
YPM 12868; Digimorph	1	5	0.375	0.386	0.336
1978.1441	1	1	0.189	0.22	0.18
1978.1441	1	2	0.223	0.206	0.149
1978.1441	1	3	0.224	0.209	0.168
1978.1441	1	4	0.187	0.223	0.199
1978.1441	1	5	0.234	0.275	0.219
S/1973.66.109	1	1	0.57	0.518	0.489
S/1973.66.109	1	2	0.53	0.492	0.552
S/1973.66.109	1	3	0.526	0.504	0.516
S/1973.66.109	1	4	0.435	0.497	0.512
S/1973.66.109	1	5	0.379	0.489	0.555
1900.9.22.15	1	1	0.223	0.266	0.275
1900.9.22.15	1	2	0.222	0.257	0.225
1900.9.22.15	1	3	0.225	0.246	0.241
1900.9.22.15	1	4	0.23	0.227	0.217
1900.9.22.15	1	5	0.244	0.251	0.193
TNHC 62769; Digimorph	1	1	0.62	0.694	0.55
TNHC 62769; Digimorph	1	2	0.693	0.684	0.536
TNHC 62769; Digimorph	1	3	0.821	0.618	0.498
TNHC 62769; Digimorph	1	4	0.765	0.599	0.46
TNHC 62769; Digimorph	1	5	0.737	0.653	0.576
NHM Unregistered Palaeontology Comparative Collection (6)9	1	1	0.279	0.305	0.242
NHM Unregistered Palaeontology Comparative Collection (6)9	1	2	0.254	0.288	0.27
NHM Unregistered Palaeontology Comparative Collection (6)9	1	3	0.288	0.306	0.284
NHM Unregistered Palaeontology Comparative Collection (6)9	1	4	0.271	0.289	0.27
NHM Unregistered Palaeontology Comparative Collection (6)9	1	5	0.267	0.305	0.29
S/1986.75.13	1	1	0.645	0.715	0.696
S/1986.75.13	1	2	0.65	0.675	0.723
S/1986.75.13	1	3	0.61	0.645	0.779
S/1986.75.13	1	4	0.627	0.665	0.714
S/1986.75.13	1	5	0.628	0.595	0.652
LDUCZ x036	1	1	0.387	0.294	0.73
LDUCZ x036	1	2	0.615	0.387	0.743
LDUCZ x036	1	3	0.516	0.29	0.656
LDUCZ x036	1	4	0.476	0.241	0.669
LDUCZ x036	1	5	0.324	0.265	0.593
UF 21341	1	1	0.6187	0.9444	0.699
UF 21341	1	2	0.6687	0.7539	0.8372
UF 21341	1	3	0.7428	0.7025	0.7814
UF 21341	1	4	0.6776	0.7285	0.7518
UF 21341	1	5	0.7837	0.7459	0.8244
1927.2.5.1	1	1	0.925	1.008	0.878
1927.2.5.1	1	2	0.914	0.947	0.845
1927.2.5.1	1	3	0.986	0.923	0.85
1927.2.5.1	1	4	1.042	0.955	0.826
1927.2.5.1	1	5	1.081	0.897	0.843
S/2002.46.1	1	1	0.262	0.249	0.265
S/2002.46.1	1	2	0.227	0.229	0.271
S/2002.46.1	1	3	0.244	0.227	0.269
S/2002.46.1	1	4	0.288	0.234	0.262
S/2002.46.1	1	5	0.229	0.27	0.262
29a	1	1	0.526	0.539	0.646
29a	1	2	0.507	0.579	0.688
29a	1	3	0.525	0.578	0.676
29a	1	4	0.515	0.554	0.685
29a	1	5	0.582	0.552	0.67
USNM211322	1	1	0.178	0.181	0.235
USNM211322	1	2	0.179	0.253	0.245
USNM211322	1	3	0.181	0.185	0.243
USNM211322	1	4	0.157	0.19	0.224
USNM211322	1	5	0.18	0.206	0.234
1938.5.7.59	1	1	0.303	0.377	0.323
1938.5.7.59	1	2	0.326	0.327	0.327
1938.5.7.59	1	3	0.326	0.399	0.347
1938.5.7.59	1	4	0.3	0.317	0.328
1938.5.7.59	1	5	0.341	0.36	0.329
S/1981.39.1	1	1	0.681	0.586	0.656
S/1981.39.1	1	2	0.642	0.553	0.618
S/1981.39.1	1	3	0.631	0.589	0.617
S/1981.39.1	1	4	0.629	0.489	0.521
S/1981.39.1	1	5	0.602	0.549	0.57
UCA.5; Digimorph	1	1	0.485	0.386	0.48
UCA.5; Digimorph	1	2	0.522	0.433	0.543
UCA.5; Digimorph	1	3	0.51	0.546	0.52
UCA.5; Digimorph	1	4	0.535	0.662	0.531
UCA.5; Digimorph	1	5	0.608	0.715	0.541
1932.6.1.12	1	1	0.49	0.589	0.561
1932.6.1.12	1	2	0.52	0.594	0.542
1932.6.1.12	1	3	0.593	0.553	0.548
1932.6.1.12	1	4	0.697	0.501	0.513
1932.6.1.12	1	5	0.636	0.487	0.497
97.5.31.1	1	1	0.587	0.506	0.593
97.5.31.1	1	2	0.566	0.538	0.771
97.5.31.1	1	3	0.678	0.438	0.64
97.5.31.1	1	4	0.813	0.703	0.587
97.5.31.1	1	5	0.735	0.881	0.575
UCMZ R.9586	1	1	0.652	0.808	0.757
UCMZ R.9586	1	2	0.697	0.778	0.796
UCMZ R.9586	1	3	0.771	0.805	0.834
UCMZ R.9586	1	4	0.907	0.785	0.979
UCMZ R.9586	1	5	0.742	0.802	0.734
AM 6556	1	1	1.573	1.854	2.746
AM 6556	1	2	1.561	2.109	3.052
AM 6556	1	3	1.573	1.186	3.046
AM 6556	1	4	1.63	1.632	3.015
AM 6556	1	5	1.892	1.609	2.919
CG WB123	1	1	1.58	0.847	1.135
CG WB123	1	2	1.32	0.857	1.127
CG WB123	1	3	0.731	0.894	1.165
CG WB123	1	4	0.779	0.833	1.131
CG WB123	1	5	0.709	0.867	1.169
BP/1/3924	1	1	0.583	0.367	0.406
BP/1/3924	1	2	0.563	0.3	0.742
BP/1/3924	1	3	0.511	0.369	0.742
BP/1/3924	1	4	0.582	0.389	0.732
BP/1/3924	1	5	0.57	0.288	0.5
BP/1/816	1	1	0.591	0.468	0.672
BP/1/816	1	2	0.57	0.708	0.706
BP/1/816	1	3	0.517	0.707	0.797
BP/1/816	1	4	0.711	0.576	0.769
BP/1/816	1	5	0.546	0.75	0.7
NMQR1702	1	1	1.399	0.894	0.616
NMQR1702	1	2	1.227	0.848	0.762
NMQR1702	1	3	1.121	0.88	0.465
NMQR1702	1	4	1.021	0.871	0.904
NMQR1702	1	5	1.232	0.817	1.162
SAM-PK-11112	1	1	0.84	0.732	0.589
SAM-PK-11112	1	2	1.342	1.415	1.416
SAM-PK-11112	1	3	1.32	1.374	1.427
SAM-PK-11112	1	4	1.222	1.409	1.25
SAM-PK-11112	1	5	1.075	1.076	0.954
BP/1/155	1	1	0.662	0.596	0.783
BP/1/155	1	2	0.719	0.739	0.812
BP/1/155	1	3	0.903	0.739	0.835
BP/1/155	1	4	0.741	0.666	0.818
BP/1/155	1	5	0.625	0.594	0.762
BP/1/216	1	1	0.773	0.557	0.561
BP/1/216	1	2	0.731	0.562	0.62
BP/1/216	1	3	0.735	0.653	0.594
BP/1/216	1	4	0.581	0.566	0.614
BP/1/216	1	5	0.566	0.761	0.594
SAM-PK-K 8797	1	1	0.428	0.414	0.679
SAM-PK-K 8797	1	2	0.403	0.412	0.766
SAM-PK-K 8797	1	3	0.45	0.412	0.552
SAM-PK-K 8797	1	4	0.423	0.387	0.638
SAM-PK-K 8797	1	5	0.473	0.391	0.453
SAM-PK-10160	1	1	0.453	0.458	0.628
SAM-PK-10160	1	2	0.514	0.437	0.647
SAM-PK-10160	1	3	0.465	0.393	0.618
SAM-PK-10160	1	4	0.475	0.437	0.631
SAM-PK-10160	1	5	0.6	0.445	0.445
NHMUK 5696	1	1	0.567	0.518	0.932
NHMUK 5696	1	2	0.503	0.404	0.963
NHMUK 5696	1	3	0.607	0.46	1.024
NHMUK 5696	1	4	0.655	0.416	0.765
NHMUK 5696	1	5	0.852	0.369	0.686
BP/1/4009	1	1	1.092	0.996	0.707
BP/1/4009	1	2	0.801	0.814	1.222
BP/1/4009	1	3	0.853	0.848	0.807
BP/1/4009	1	4	1.017	0.88	0.786
BP/1/4009	1	5	0.913	0.823	0.962
BP/1/3849	1	1	0.552	0.893	0.703
BP/1/3849	1	2	0.641	0.849	0.537
BP/1/3849	1	3	0.832	0.851	0.632
BP/1/3849	1	4	0.638	0.925	0.509
BP/1/3849	1	5	0.73	0.55	0.467
BP/1/1563	1	1	0.572	0.65	0.981
BP/1/1563	1	2	0.584	0.66	0.688
BP/1/1563	1	3	0.751	0.681	0.728
BP/1/1563	1	4	0.712	0.636	0.754
BP/1/1563	1	5	0.614	0.539	0.838
BP/1/3926	1	1	0.622	0.986	1.156
BP/1/3926	1	2	0.791	0.933	1.014
BP/1/3926	1	3	0.847	0.752	0.842
BP/1/3926	1	4	0.447	0.334	0.777
BP/1/3926	1	5	0.456	0.369	0.861
BP/1/4263	1	1	0.297	0.354	0.355
BP/1/4263	1	2	0.318	0.344	0.533
BP/1/4263	1	3	0.234	0.349	0.657
BP/1/4263	1	4	0.58	0.448	0.515
BP/1/4263	1	5	0.625	0.604	0.36
BP/1/7199	1	1	0.19	0.295	0.253
BP/1/7199	1	2	0.178	0.239	0.265
BP/1/7199	1	3	0.154	0.176	0.313
BP/1/7199	1	4	0.194	0.179	0.327
BP/1/7199	1	5	0.259	0.169	0.306
NMQR860	1	1	0.635	0.79	0.843
NMQR860	1	2	0.654	0.833	1.07
NMQR860	1	3	0.764	0.786	1.052
NMQR860	1	4	0.863	0.818	0.968
NMQR860	1	5	0.701	0.784	1.163
AM 461	1	1	0.557	0.407	0.62
AM 461	1	2	0.411	0.426	0.606
AM 461	1	3	0.427	0.426	0.761
AM 461	1	4	0.382	0.444	0.856
AM 461	1	5	0.423	0.453	0.888
BP/1/4658	1	1	0.445	0.48	0.637
BP/1/4658	1	2	0.47	0.419	0.66
BP/1/4658	1	3	0.572	0.435	0.541
BP/1/4658	1	4	0.583	0.356	0.722
BP/1/4658	1	5	0.49	0.439	0.766
BP/1/4534	1	1	0.274	0.353	0.517
BP/1/4534	1	2	0.327	0.425	0.53
BP/1/4534	1	3	0.374	0.354	0.577
BP/1/4534	1	4	0.49	0.437	0.784
BP/1/4534	1	5	0.408	0.454	0.99
BP/1/2669	1	1	0.39	0.357	0.524
BP/1/2669	1	2	0.503	0.382	0.57
BP/1/2669	1	3	0.437	0.28	0.65
BP/1/2669	1	4	0.698	0.261	0.583
BP/1/2669	1	5	0.401	0.37	0.665
MS86	1	1	0.396	0.308	0.363
MS86	1	2	0.424	0.344	0.335
MS86	1	3	0.318	0.402	0.393
MS86	1	4	0.342	0.455	0.462
MS86	1	5	0.337	0.412	0.493
BP/4/908	1	1	0.229	0.288	0.465
BP/4/908	1	2	0.245	0.247	0.301
BP/4/908	1	3	0.254	0.309	0.292
BP/4/908	1	4	0.221	0.28	0.303
BP/4/908	1	5	0.216	0.241	0.355
BP/1/4983	1	1	0.21	0.164	0.171
BP/1/4983	1	2	0.287	0.166	0.133
BP/1/4983	1	3	0.203	0.148	0.218
BP/1/4983	1	4	0.152	0.123	0.158
BP/1/4983	1	5	0.129	0.172	0.164
BP/1/4245	1	1	0.374	0.275	0.518
BP/1/4245	1	2	0.479	0.215	0.459
BP/1/4245	1	3	0.377	0.192	0.604
BP/1/4245	1	4	0.482	0.11	0.56
BP/1/4245	1	5	0.454	0.196	0.573
NHCC LB18	1	1	0.441	0.395	0.704
NHCC LB18	1	2	0.444	0.496	0.602
NHCC LB18	1	3	0.477	0.465	0.57
NHCC LB18	1	4	0.493	0.562	0.512
NHCC LB18	1	5	0.393	0.517	0.617
TMMM-150	1	1	0.236	0.217	0.233
TMMM-150	1	2	0.249	0.22	0.254
TMMM-150	1	3	0.225	0.175	0.23
TMMM-150	1	4	0.245	0.199	0.256
TMMM-150	1	5	0.206	0.198	0.27
TMM-M-7283	1	1	0.122	0.11	0.148
TMM-M-7283	1	2	0.117	0.121	0.148
TMM-M-7283	1	3	0.107	0.104	0.19
TMM-M-7283	1	4	0.109	0.1	0.192
TMM-M-7283	1	5	0.096	0.114	0.084
AMNH82372	1	1	0.111	0.105	0.193
AMNH82372	1	2	0.108	0.118	0.18
AMNH82372	1	3	0.117	0.117	0.19
AMNH82372	1	4	0.907	0.121	0.125
AMNH82372	1	5	0.14	0.11	0.137
AMNH187859	1	1	0.313	0.312	0.262
AMNH187859	1	2	0.352	0.335	0.321
AMNH187859	1	3	0.251	0.35	0.31
AMNH187859	1	4	0.279	0.36	0.317
AMNH187859	1	5	0.282	0.327	0.271
TMM-M-1885	1	1	0.244	0.252	0.289
TMM-M-1885	1	2	0.25	0.233	0.281
TMM-M-1885	1	3	0.244	0.238	0.288
TMM-M-1885	1	4	0.282	0.235	0.28
TMM-M-1885	1	5	0.318	0.244	0.262
TMM-M-2517	1	1	0.208	0.188	0.277
TMM-M-2517	1	2	0.251	0.183	0.267
TMM-M-2517	1	3	0.221	0.172	0.259
TMM-M-2517	1	4	0.259	0.183	0.272
TMM-M-2517	1	5	0.209	0.219	0.27
TMM-M-171	1	1	0.372	0.359	0.458
TMM-M-171	1	2	0.414	0.384	0.424
TMM-M-171	1	3	0.415	0.368	0.458
TMM-M-171	1	4	0.447	0.388	0.5
TMM-M-171	1	5	0.46	0.419	0.688
TMM-M-968	1	1	0.189	0.192	0.201
TMM-M-968	1	2	0.182	0.164	0.172
TMM-M-968	1	3	0.186	0.162	0.158
TMM-M-968	1	4	0.123	0.22	0.165
TMM-M-968	1	5	0.21	0.214	0.196
AMNH161535	1	1	0.121	0.156	0.16
AMNH161535	1	2	0.135	0.138	0.166
AMNH161535	1	3	0.121	0.126	0.165
AMNH161535	1	4	0.137	0.129	0.149
AMNH161535	1	5	0.161	0.156	0.14
UTO-HS01	1	1	1.01	0.822	0.73
UTO-HS01	1	2	1.154	0.831	0.832
UTO-HS01	1	3	0.739	1.073	0.79
UTO-HS01	1	4	0.749	0.63	0.785
UTO-HS01	1	5	0.905	0.79	0.967
TMM-M-7500	1	1	0.206	0.212	0.257
TMM-M-7500	1	2	0.209	0.211	0.261
TMM-M-7500	1	3	0.214	0.212	0.256
TMM-M-7500	1	4	0.209	0.22	0.251
TMM-M-7500	1	5	0.203	0.267	0.226
TMM-M-5987	1	1	0.424	0.363	0.353
TMM-M-5987	1	2	0.303	0.303	0.302
TMM-M-5987	1	3	0.274	0.314	0.286
TMM-M-5987	1	4	0.308	0.257	0.298
TMM-M-5987	1	5	0.359	0.337	0.268
AMNH53896	1	1	0.439	0.399	0.444
AMNH53896	1	2	0.424	0.431	0.403
AMNH53896	1	3	0.43	0.444	0.428
AMNH53896	1	4	0.425	0.417	0.449
AMNH53896	1	5	0.434	0.41	0.488
TMM-M-7599	1	1	0.191	0.103	0.186
TMM-M-7599	1	2	0.225	0.138	0.158
TMM-M-7599	1	3	0.117	0.146	0.175
TMM-M-7599	1	4	0.148	0.139	0.146
TMM-M-7599	1	5	0.142	0.145	0.134
TMM-M-3196	1	1	0.0906	0.094	0.109
TMM-M-3196	1	2	0.087	0.078	0.106
TMM-M-3196	1	3	0.12	0.088	0.108
TMM-M-3196	1	4	0.089	0.068	0.108
TMM-M-3196	1	5	0.097	0.085	0.137
AMNH51909	1	1	0.439	0.528	0.49
AMNH51909	1	2	0.468	0.476	0.479
AMNH51909	1	3	0.43	0.516	0.508
AMNH51909	1	4	0.442	0.437	0.467
AMNH51909	1	5	0.485	0.395	0.445
TMM-M-4351	1	1	0.201	0.208	0.231
TMM-M-4351	1	2	0.196	0.206	0.212
TMM-M-4351	1	3	0.211	0.251	0.219
TMM-M-4351	1	4	0.233	0.208	0.193
TMM-M-4351	1	5	0.218	0.209	0.223
AMNH237593	1	1	0.111	0.126	0.134
AMNH237593	1	2	0.14	0.116	0.149
AMNH237593	1	3	0.129	0.126	0.151
AMNH237593	1	4	0.104	0.111	0.112
AMNH237593	1	5	0.085	0.121	0.155
AMNH245591	1	1	0.101	0.105	0.085
AMNH245591	1	2	0.1	0.124	0.125
AMNH245591	1	3	0.105	0.093	0.081
AMNH245591	1	4	0.119	0.087	0.094
AMNH245591	1	5	0.094	0.086	0.133
unvouchered	1	1	0.123	0.106	0.111
unvouchered	1	2	0.12	0.104	0.118
unvouchered	1	3	0.107	0.115	0.14
unvouchered	1	4	0.114	0.119	0.131
unvouchered	1	5	0.105	0.097	0.139
TMM-M-2689	1	1	0.135	0.168	0.145
TMM-M-2689	1	2	0.141	0.148	0.159
TMM-M-2689	1	3	0.128	0.163	0.136
TMM-M-2689	1	4	0.152	0.145	0.146
TMM-M-2689	1	5	0.135	0.16	0.125
TMM-M-3030	1	1	0.132	0.133	0.163
TMM-M-3030	1	2	0.142	0.138	0.167
TMM-M-3030	1	3	0.141	0.138	0.171
TMM-M-3030	1	4	0.141	0.147	0.15
TMM-M-3030	1	5	0.152	0.156	0.171
MSW03156	1	1	0.489	0.416	0.417
MSW03156	1	2	0.648	0.474	0.414
MSW03156	1	3	0.581	0.518	0.68
MSW03156	1	4	0.465	0.53	0.451
MSW03156	1	5	0.554	0.575	0.513
TMM-M-2256	1	1	0.121	0.139	0.131
TMM-M-2256	1	2	0.115	0.128	0.148
TMM-M-2256	1	3	0.149	0.134	0.129
TMM-M-2256	1	4	0.122	0.131	0.129
TMM-M-2256	1	5	0.129	0.151	0.153
SDNHM21212	1	1	0.271	0.283	0.337
SDNHM21212	1	2	0.297	0.291	0.332
SDNHM21212	1	3	0.271	0.271	0.333
SDNHM21212	1	4	0.275	0.272	0.331
SDNHM21212	1	5	0.259	0.268	0.332
IPHEP unvouchered	1	1	0.473	0.429	0.329
IPHEP unvouchered	1	2	0.441	0.37	0.277
IPHEP unvouchered	1	3	0.389	0.326	0.189
IPHEP unvouchered	1	4	0.4	0.291	0.202
IPHEP unvouchered	1	5	0.402	0.345	0.239
UCR 3116	1	1	0.759	0.415	0.78
UCR 3116	1	2	0.774	0.442	0.601
UCR 3116	1	3	0.601	0.717	0.578
UCR 3116	1	4	0.496	0.456	0.646
UCR 3116	1	5	0.466	0.483	0.69
RMCA 83,001-M-0014	1	1	0.239	0.218	0.228
RMCA 83,001-M-0014	1	2	0.153	0.169	0.166
RMCA 83,001-M-0014	1	3	0.199	0.217	0.183
RMCA 83,001-M-0014	1	4	0.211	0.242	0.208
RMCA 83,001-M-0014	1	5	0.219	0.267	0.21
AMNH M 24289	1	1	0.359	0.269	0.33
AMNH M 24289	1	2	0.33	0.279	0.367
AMNH M 24289	1	3	0.304	0.31	0.341
AMNH M 24289	1	4	0.254	0.279	0.319
AMNH M 24289	1	5	0.242	0.242	0.324
AMNH M 53672	1	1	0.421	0.389	0.45
AMNH M 53672	1	2	0.405	0.394	0.43
AMNH M 53672	1	3	0.394	0.389	0.427
AMNH M 53672	1	4	0.385	0.41	0.43
AMNH M 53672	1	5	0.39	0.443	0.42
UM N- 228	1	1	0.43	0.432	0.334
UM N- 228	1	2	0.436	0.417	0.537
UM N- 228	1	3	0.463	0.437	0.361
UM N- 228	1	4	0.46	0.394	0.372
UM N- 228	1	5	0.456	0.401	0.426
AMNH unvouchered	1	1	0.438	0.236	0.328
AMNH unvouchered	1	2	0.351	0.212	0.335
AMNH unvouchered	1	3	0.345	0.24	0.324
AMNH unvouchered	1	4	0.354	0.275	0.343
AMNH unvouchered	1	5	0.346	0.299	0.342
UM N-671	1	1	0.413	0.399	0.378
UM N-671	1	2	0.404	0.202	0.566
UM N-671	1	3	0.423	0.458	0.536
UM N-671	1	4	0.453	0.462	0.641
UM N-671	1	5	0.313	0.48	0.58
AMNH M 2238	1	1	0.422	0.464	0.494
AMNH M 2238	1	2	0.458	0.403	0.512
AMNH M 2238	1	3	0.401	0.352	0.444
AMNH M 2238	1	4	0.411	0.345	0.397
AMNH M 2238	1	5	0.412	0.371	0.381
UM2 N-177	1	1	1.371	1.328	1.186
UM2 N-177	1	2	1.136	1.222	1.191
UM2 N-177	1	3	1.094	1.409	1.134
UM2 N-177	1	4	1.353	1.085	0.863
UM2 N-177	1	5	1.419	1.033	1.233
UM PDS 3360	1	1	0.401	0.312	0.374
UM PDS 3360	1	2	0.342	0.306	0.347
UM PDS 3360	1	3	0.375	0.311	0.319
UM PDS 3360	1	4	0.309	0.312	0.292
UM PDS 3360	1	5	0.32	0.305	0.348
UM ITD 1080	1	1	0.415	0.302	0.46
UM ITD 1080	1	2	0.429	0.296	0.396
UM ITD 1080	1	3	0.291	0.318	0.374
UM ITD 1080	1	4	0.276	0.309	0.358
UM ITD 1080	1	5	0.267	0.258	0.394
MNHN Qu1	1	1	0.629	0.473	0.45
MNHN Qu1	1	2	0.387	0.591	0.446
MNHN Qu1	1	3	0.543	0.537	0.386
MNHN Qu1	1	4	0.5	0.563	0.492
MNHN Qu1	1	5	0.544	0.542	0.415
UM N-170	1	1	0.459	0.578	0.532
UM N-170	1	2	0.416	0.52	0.507
UM N-170	1	3	0.429	0.552	0.539
UM N-170	1	4	0.449	0.496	0.562
UM N-170	1	5	0.472	0.499	0.565
UM 58V	1	1	0.209	0.265	0.313
UM 58V	1	2	0.221	0.235	0.294
UM 58V	1	3	0.207	0.241	0.298
UM 58V	1	4	0.274	0.233	0.232
UM 58V	1	5	0.248	0.19	0.259
UM PV 251212	1	1	0.919	0.933	0.887
UM PV 251212	1	2	0.827	0.974	0.763
UM PV 251212	1	3	0.911	0.973	0.88
UM PV 251212	1	4	0.935	0.949	1.031
UM PV 251212	1	5	0.941	0.792	0.908
UM N 03	1	1	0.406	0.329	0.415
UM N 03	1	2	0.333	0.333	0.4
UM N 03	1	3	0.328	0.319	0.369
UM N 03	1	4	0.338	0.338	0.37
UM N 03	1	5	0.304	0.314	0.382
UM N 785V	1	1	0.512	0.535	0.798
UM N 785V	1	2	0.39	0.48	0.832
UM N 785V	1	3	0.588	0.659	0.52
UM N 785V	1	4	0.651	0.685	0.542
UM N 785V	1	5	0.523	0.69	0.695
AMNH 268369	1	1	0.214	0.078	0.143
AMNH 268369	1	2	0.126	0.139	0.174
AMNH 268369	1	3	0.128	0.067	0.25
AMNH 268369	1	4	0.132	0.131	0.073
AMNH 268369	1	5	0.121	0.152	0.156
TMM 40882-41	1	1	0.57	0.619	0.603
TMM 40882-41	1	2	0.6	0.609	0.745
TMM 40882-41	1	3	0.757	0.665	0.767
TMM 40882-41	1	4	0.489	0.679	0.785
TMM 40882-41	1	5	0.589	0.668	0.703
BP/1/3575	1	1	0.833	0.732	0.818
BP/1/3575	1	2	0.859	0.833	0.815
BP/1/3575	1	3	0.656	0.73	0.874
BP/1/3575	1	4	0.572	0.723	0.848
BP/1/3575	1	5	0.584	0.582	0.897
NHMUK R37054	1	1	0.54	0.674	1.26
NHMUK R37054	1	2	0.57	0.74	0.864
NHMUK R37054	1	3	0.66	0.754	1.105
NHMUK R37054	1	4	0.84	0.762	1.142
NHMUK R37054	1	5	0.537	0.712	1.095
NHCC LB 117	1	1	1.03	1.199	1.24
NHCC LB 117	1	2	0.967	1.331	0.891
NHCC LB 117	1	3	0.927	1.138	1.004
NHCC LB 117	1	4	0.904	1.219	0.938
NHCC LB 117	1	5	1.075	1.124	0.79
NMT RB581	1	1	0.87	0.769	1.003
NMT RB581	1	2	0.851	0.832	1.1138
NMT RB581	1	3	0.889	0.859	1.257
NMT RB581	1	4	0.712	0.868	1.188
NMT RB581	1	5	0.721	0.869	1.33
IVPP 8275	1	1	0.21	0.29	0.28
IVPP 8275	1	2	0.2	0.26	0.24
IVPP 8275	1	3	0.2	0.27	0.26
IVPP 8275	1	4	0.23	0.24	0.31
IVPP 8275	1	5	0.25	0.24	0.33
IVPP 8685	1	1	0.15	0.17	0.15
IVPP 8685	1	2	0.13	0.16	0.15
IVPP 8685	1	3	0.15	0.14	0.17
IVPP 8685	1	4	0.14	0.16	0.15
IVPP 8685	1	5	0.13	0.15	0.11
NHCC LB44	1	1	0.4	0.334	0.759
NHCC LB44	1	2	0.409	0.379	0.738
NHCC LB44	1	3	0.41	0.445	0.72
NHCC LB44	1	4	0.4	0.39	0.823
NHCC LB44	1	5	0.411	0.345	0.825
FMNH 218598	1	1	0.526	0.57	0.543
FMNH 218598	1	2	0.56	0.628	0.576
FMNH 218598	1	3	0.54	0.53	0.625
FMNH 218598	1	4	0.532	0.523	0.57
FMNH 218598	1	5	0.519	0.463	0.597
FMNH 10694	1	1	0.671	0.58	0.782
FMNH 10694	1	2	0.662	0.508	0.75
FMNH 10694	1	3	0.623	0.549	0.632
FMNH 10694	1	4	0.696	0.488	0.694
FMNH 10694	1	5	0.55	0.508	0.647
BMNH 2858	1	1	0.252	0.249	0.205
BMNH 2858	1	2	0.194	0.228	0.19
BMNH 2858	1	3	0.211	0.261	0.198
BMNH 2858	1	4	0.292	0.274	0.209
BMNH 2858	1	5	0.228	0.267	0.271
BP/1/5088	1	1	0.439	0.545	0.465
BP/1/5088	1	2	0.417	0.554	0.463
BP/1/5088	1	3	0.561	0.589	0.517
BP/1/5088	1	4	0.557	0.591	0.581
BP/1/5088	1	5	0.415	0.497	0.569
BP/1/4778	1	1	0.475	0.442	0.656
BP/1/4778	1	2	0.497	0.384	0.768
BP/1/4778	1	3	0.499	0.409	0.678
BP/1/4778	1	4	0.453	0.508	0.751
BP/1/4778	1	5	0.42	0.523	0.78
FMNH UR 27	1	1	1.277	1.038	0.89
FMNH UR 27	1	2	1.103	1.002	1.019
FMNH UR 27	1	3	0.978	0.894	1.219
FMNH UR 27	1	4	1.081	0.932	1.242
FMNH UR 27	1	5	1.066	0.895	1.171
MCZ 3778	1	1	0.63	1.45	1.08
MCZ 3778	1	2	0.7	1.43	0.94
MCZ 3778	1	3	0.73	1.55	0.9
MCZ 3778	1	4	0.66	1.46	1.06
MCZ 3778	1	5	0.76	1.4	1.07
UFRGS PV833T	1	1	0.55	0.51	0.66
UFRGS PV833T	1	2	0.51	0.43	0.56
UFRGS PV833T	1	3	0.47	0.45	0.88
UFRGS PV833T	1	4	0.44	0.6	0.83
UFRGS PV833T	1	5	0.5	0.6	0.87
UFRGS PV1043	1	1	0.24	0.33	0.42
UFRGS PV1043	1	2	0.25	0.35	0.42
UFRGS PV1043	1	3	0.25	0.35	0.36
UFRGS PV1043	1	4	0.33	0.29	0.41
UFRGS PV1043	1	5	0.3	0.31	0.36
NHMUK 7090	1	1	0.28	0.35	0.46
NHMUK 7090	1	2	0.31	0.32	0.51
NHMUK 7090	1	3	0.34	0.37	0.5
NHMUK 7090	1	4	0.36	0.33	0.5
NHMUK 7090	1	5	0.31	0.3	0.58
MG 6807 (Gui Mam 2/81)	1	1	0.216	0.187	0.266
MG 6807 (Gui Mam 2/81)	1	2	0.196	0.184	0.26
MG 6807 (Gui Mam 2/81)	1	3	0.216	0.169	0.267
MG 6807 (Gui Mam 2/81)	1	4	0.197	0.156	0.235
MG 6807 (Gui Mam 2/81)	1	5	0.199	0.199	0.261

## Sheet: RRX_HID22
1	0.1904	2	0.375	2	0.286	1	0.186999
2	0.3356	4	0.244	10	0.822	1	0.194
3	0.7864	10	0.925	14	2.266	2	0.285999
4	0.2288	14	2.198	19	0.582	2	0.375
5	0.9896	22	0.382	22	0.557	3	0.687
6	0.4632	32	0.119	23	1.892	3	0.865999
7	0.3998	37	0.903	24	0.214	4	0.222
8	0.5872	40	0.698	25	0.458	4	0.243999
9	0.3192	43	0.511	28	0.438	5	0.914
10	0.889	54	0.711	35	0.907	5	1.081
11	0.4212	61	0.55	53	0.259	6	0.362999
12	0.221	67	0.35	62	0.13	6	0.551
13	0.3216	68	0.16	62	0.17	7	0.34
14	2.2218	71	0.43	81	0.113	7	0.475999
15	0.2688	74	0.45	83	0.648	8	0.489999
16	0.2114	82	0.25	86	1.277	8	0.696999
17	0.2022	85	0.41	98	0.18	9	0.299999
18	0.3482	86	0.978	98	0.23	9	0.341
19	0.531	87	1.095	109	0.384	10	0.821999
20	0.4172	91	0.16	109	0.794	10	0.925
21	0.6758	95	0.387	114	0.496	11	0.378
22	0.44	95	0.629	117	0.605	11	0.481999
23	1.6458	103	0.852	128	0.297	12	0.203999
24	0.1442	106	1.399	129	0.757	12	0.234
25	0.4208	110	0.153	131	0.898	13	0.298999
26	0.2978	111	0.864	137	0.132	13	0.343
27	0.399	115	0.682	137	0.152	14	2.198
28	0.3668	118	0.602	144	0.123	14	2.266
29	0.135	118	0.681	148	0.38	15	0.248999
30	0.2954	125	0.6	159	0.406	15	0.296999
31	0.1138	128	0.259	163	0.313	16	0.186999
32	0.1038	129	0.489	165	0.827	16	0.234
33	0.4528	134	0.149	169	0.15	17	0.192
34	0.4304	136	0.152	172	0.137	17	0.209999
35	0.2766	138	0.12	173	0.157	18	0.32
36	0.2354	142	0.214			18	0.387
37	0.73	144	0.21			19	0.507
38	0.6466	148	0.31			19	0.581999
39	0.6772	150	0.608			20	0.372999
40	0.4858	151	0.907			20	0.490999
41	0.7008	159	0.304			21	0.565999
42	0.6786	160	0.39			21	0.812999
43	0.5618	163	0.453			22	0.382
44	0.6326	168	0.18			22	0.557
45	0.9352	170	0.38			23	1.561
46	0.4332	177	0.204			23	1.892
47	0.4108	178	0.26			24	0.120999
48	0.3746	183	0.452			24	0.213999
49	0.512					25	0.401
50	0.4688					25	0.458
51	0.1962					26	0.241999
52	0.4778					26	0.358999
53	0.195					27	0.385
54	0.587					27	0.420999
55	0.233					28	0.344999
56	1.2246					28	0.438
57	0.16					29	0.120999
58	0.306					29	0.161
59	1.0238					30	0.251
60	0.35					30	0.351999
61	0.6404					31	0.085
62	0.156					31	0.14
63	0.188					32	0.094
64	0.362					32	0.118999
65	0.272					33	0.429999
66	0.222					33	0.484999
67	0.306					34	0.423999
68	0.138					34	0.439
69	0.268					35	0.107999
70	0.404					35	0.907
71	0.408					36	0.194
72	0.5354					36	0.291999
73	0.238					37	0.625
74	0.374					37	0.903
75	0.19					38	0.571999
76	0.432					38	0.751
77	0.368					39	0.565999
78	0.954					39	0.773
79	0.406					40	0.39
80	0.258					40	0.697999
81	0.136					41	0.571999
82	0.314					41	0.858999
83	0.804					42	0.552
84	0.102					42	0.831999
85	0.43					43	0.511
86	1.101					43	0.582999
87	1.3656					44	0.447
88	0.421					44	0.846999
89	0.218					45	0.801
90	0.14					45	1.092
91	0.206					46	0.373999
92	0.4636					46	0.481999
93	0.696					47	0.234
94	0.2048					47	0.625
95	0.5206					48	0.274
96	0.3634					48	0.489999
97	0.5474					49	0.445
98	0.196					49	0.582999
99	0.9806					50	0.419999
100	0.4496					50	0.498999
101	0.406					51	0.129
102	0.2718					51	0.286999
103	0.6368					52	0.414999
104	0.32					52	0.561
105	0.6294					53	0.153999
106	1.2					53	0.259
107	0.7234					54	0.517
108	0.8086					54	0.710999
109	0.5446					55	0.215999
110	0.2042					55	0.254
111	0.8108					56	1.086
112	0.2932					56	1.367
113	0.3136					57	0.149999
114	0.4318					57	0.17
115	0.6374					58	0.26
116	0.488					58	0.33
117	0.6962					59	0.708999
118	0.637					59	1.58
119	0.632					60	0.33
120	0.5062					60	0.39
121	0.9472					61	0.55
122	0.7782					61	0.695999
123	0.25					62	0.13
124	1.156					62	0.17
125	0.5014					63	0.17
126	1.1598					63	0.209999
127	0.4354					64	0.32
128	0.2746					64	0.409999
129	0.601					65	0.19
130	0.9096					65	0.34
131	0.7214					66	0.209999
132	0.4216					66	0.239999
133	0.2676					67	0.27
134	0.1272					67	0.349999
135	0.2296					68	0.13
136	0.1382					68	0.16
137	0.1416					69	0.25
138	0.09672					69	0.289999
139	0.2118					70	0.38
140	0.3336					70	0.429999
141	0.1102					71	0.4
142	0.2082					71	0.429999
143	0.1646					72	0.519
144	0.178					72	0.56
145	0.2322					73	0.22
146	0.5458					73	0.25
147	0.7272					74	0.33
148	0.338					74	0.45
149	0.566					75	0.16
150	0.532					75	0.209999
151	0.7538					76	0.419999
152	0.6192					76	0.44
153	0.6983					77	0.33
154	1.066					77	0.419999
155	0.274					78	0.829999
156	0.494					78	1.07
157	0.2318					79	0.32
158	0.3356					79	0.469999
159	0.3418					80	0.239999
160	0.5328					80	0.27
161	0.449					81	0.113
162	0.445					81	0.145999
163	0.4012					82	0.25
164	0.3494					82	0.34
165	0.9066					83	0.648
166	1.2746					83	0.896
167	0.366					84	0.096
168	0.204					84	0.106999
169	0.134					85	0.409999
170	0.336					85	0.44
171	0.16					86	0.977999
172	0.1528					86	1.277
173	0.175					87	1.095
174	0.9114					87	1.477
175	0.2926					88	0.389
176	0.22					88	0.472999
177	0.1936					89	0.2
178	0.218					89	0.25
179	0.359					90	0.13
180	0.432					90	0.149999
181	0.3624					91	0.16
182	0.4352					91	0.239999
183	0.4162					92	0.324
184	0.504					92	0.614999
185	0.1138					93	0.63
						93	0.76
						94	0.196
						94	0.215999
						95	0.387
						95	0.629
						96	0.318
						96	0.423999
						97	0.465
						97	0.648
						98	0.179999
						98	0.23
						99	0.904
						99	1.075
						100	0.393
						100	0.492999
						101	0.4
						101	0.410999
						102	0.254
						102	0.287999
						103	0.503
						103	0.851999
						104	0.28
						104	0.359999
						105	0.537
						105	0.839999
						106	1.021
						106	1.399
						107	0.635
						107	0.862999
						108	0.711999
						108	0.889
						109	0.384
						109	0.794
						110	0.152999
						110	0.238999
						111	0.78
						111	0.863999
						112	0.271
						112	0.327
						113	0.298999
						113	0.324
						114	0.407999
						114	0.495999
						115	0.616999
						115	0.682
						116	0.379
						116	0.569999
						117	0.604999
						117	0.731999
						118	0.601999
						118	0.681
						119	0.609999
						119	0.65
						120	0.441
						120	0.565999
						121	0.840999
						121	1.06
						122	0.740999
						122	0.832999
						123	0.227
						123	0.287999
						124	1.136
						124	1.176
						125	0.453
						125	0.599999
						126	0.839999
						126	1.342
						127	0.403
						127	0.472999
						128	0.259
						128	0.296999
						129	0.488999
						129	0.757
						130	0.826999
						130	1.045
						131	0.638
						131	0.898
						132	0.371999
						132	0.46
						133	0.243999
						133	0.318
						134	0.115
						134	0.148999
						135	0.207999
						135	0.259
						136	0.128
						136	0.151999
						137	0.132
						137	0.151999
						138	0.086999
						138	0.119999
						139	0.196
						139	0.233
						140	0.274
						140	0.423999
						141	0.096
						141	0.121999
						142	0.203
						142	0.213999
						143	0.117
						143	0.225
						144	0.122999
						144	0.209999
						145	0.205999
						145	0.248999
						146	0.512
						146	0.582999
						147	0.619999
						147	0.820999
						148	0.309999
						148	0.38
						149	0.53
						149	0.599999
						150	0.484999
						150	0.607999
						151	0.652
						151	0.907
						152	0.466
						152	0.774
						153	0.6187
						153	0.783699
						154	0.938999
						154	1.291
						155	0.239999
						155	0.33
						156	0.44
						156	0.55
						157	0.206999
						157	0.274
						158	0.267
						158	0.428999
						159	0.303999
						159	0.406
						160	0.39
						160	0.651
						161	0.429999
						161	0.463
						162	0.415999
						162	0.471999
						163	0.313
						163	0.453
						164	0.308999
						164	0.401
						165	0.826999
						165	0.940999
						166	1.094
						166	1.419
						167	0.349999
						167	0.38
						168	0.179999
						168	0.22
						169	0.13
						169	0.149999
						170	0.309999
						170	0.38
						171	0.13
						171	0.19
						172	0.137
						172	0.158
						173	0.157
						173	0.180999
						174	0.738999
						174	1.154
						175	0.257
						175	0.346999
						176	0.209999
						176	0.23
						177	0.183999
						177	0.203999
						178	0.19
						178	0.26
						179	0.318
						179	0.438
						180	0.4
						180	0.46
						181	0.325
						181	0.385
						182	0.391
						182	0.480999
						183	0.388
						183	0.452
						184	0.44
						184	0.589999
						185	0.104999
						185	0.122999

## Sheet: RRX_HID23
1	0.187	2	0.286	3	0.687	4	0.222	5	0.914	6	0.363	7	0.34	8	0.49	9	0.3	10	0.822	11	0.378	12	0.204	13	0.299	14	2.198	15	0.249	16	0.187	17	0.192	18	0.32	19	0.507	20	0.373	21	0.566	22	0.382	23	1.561	24	0.121	25	0.401
1.18595	0.187	1.8556	0.335	3	0.736	4	0.223	5	0.925	6	0.39	7	0.358	8	0.52	9	0.303	10	0.895	11	0.395	12	0.217	13	0.31	14	2.211	15	0.256	16	0.189	17	0.196	18	0.331	19	0.515	20	0.388	21	0.587	22	0.411	22.9301	1.573	24	0.126	25	0.411
1.08547	0.192	1.99942	0.336	3	0.792	4	0.225	5	0.986	6	0.47	7	0.398	8	0.593	8.83916	0.326	10	0.897	11	0.402	12	0.222	13	0.324	13.9554	2.217	15	0.265	16	0.223	17	0.206	18	0.334	19	0.525	20	0.398	21	0.678	22	0.423	22.7834	1.573	24	0.128	25	0.412
0.91464	0.192	2	0.346	3	0.851	4	0.23	5	1.042	6	0.542	7	0.427	8	0.636	8.82262	0.326	10	0.906	11	0.449	12	0.228	13	0.332	13.8537	2.217	15	0.277	16	0.224	17	0.207	18	0.369	19	0.526	20	0.436	21	0.735	22	0.427	23	1.63	24	0.132	25	0.422
0.860198	0.194	2	0.375	3	0.866	4	0.244	5	1.081	6	0.551	7	0.476	8	0.697	9	0.341	10	0.925	11	0.482	12	0.234	13	0.343	14	2.266	15	0.297	16	0.234	17	0.21	18	0.387	19	0.582	20	0.491	21	0.813	22	0.557	23	1.892	24	0.214	25	0.458
[truncated: 206 more columns]

## Sheet: RRX_HID24
1	0.2032	4	0.227	11	0.298	1	0.195
2	0.3668	5	1.008	16	0.275	1	0.212999
3	0.813	12	0.249	18	0.408	2	0.311999
4	0.2494	17	0.226	26	0.31	2	0.406
5	0.946	18	0.345	38	0.539	3	0.773
6	0.4796	23	1.186	41	0.582	3	0.845999
7	0.4546	26	0.242	41	0.833	4	0.227
8	0.5448	27	0.443	42	0.55	4	0.266
9	0.356	45	0.996	46	0.11	5	0.897
10	0.9794	46	0.275	49	0.356	5	1.008
11	0.3754	47	0.604	56	1.8	6	0.404
12	0.2196	49	0.48	71	0.4	6	0.569999
13	0.3192	57	0.13	71	0.44	7	0.427999
14	3.2962	57	0.19	92	0.387	7	0.485999
15	0.3334	64	0.31	112	0.238	8	0.486999
16	0.2266	69	0.28	115	0.637	8	0.593999
17	0.1916	70	0.44	120	0.562	9	0.317
18	0.3674	73	0.25	122	0.721	9	0.399
19	0.5604	81	0.156	122	0.996	10	0.885
20	0.4306	87	1.965	125	0.393	10	1.107
21	0.6132	93	1.55	135	0.219	11	0.297999
22	0.4312	95	0.473	139	0.251	11	0.406
23	1.678	108	0.769	142	0.267	12	0.2
24	0.1134	110	0.169	143	0.103	12	0.248999
25	0.387	112	0.283	148	0.39	13	0.263
26	0.2758	114	0.438	152	0.717	13	0.363999
27	0.405	115	0.796	153	0.9444	14	2.978
28	0.2524	118	0.489	157	0.19	14	3.546
29	0.141	119	0.595	157	0.265	15	0.294999
30	0.3368	125	0.458	163	0.202	15	0.361999
31	0.12	132	0.419	165	0.792	16	0.205999
32	0.099	135	0.172	167	0.32	16	0.275
33	0.4704	139	0.206	174	0.63	17	0.173999
34	0.4202	146	0.404	174	1.073	17	0.226
35	0.1142	148	0.32	176	0.28	18	0.344999
36	0.2558	149	0.48	181	0.318	18	0.407999
37	0.6668	158	0.258	183	0.332	19	0.539
38	0.6332	168	0.19			19	0.578999
39	0.6198	169	0.11			20	0.384
40	0.33	170	0.28			20	0.491999
41	0.72	171	0.19			21	0.438
42	0.8136	173	0.253			21	0.881
43	0.3426	178	0.22			22	0.406999
44	0.6748	183	0.296			22	0.453
45	0.8722					23	1.186
46	0.1976					23	2.109
47	0.4198					24	0.067
48	0.4046					24	0.151999
49	0.4258					25	0.344999
50	0.4532					25	0.464
51	0.1546					26	0.241999
52	0.5552					26	0.309999
53	0.2116					27	0.389
54	0.6418					27	0.443
55	0.273					28	0.211999
56	1.409					28	0.298999
57	0.162					29	0.126
58	0.264					29	0.155999
59	0.8596					30	0.311999
60	0.278					30	0.359999
61	0.5266					31	0.111
62	0.168					31	0.126
63	0.242					32	0.085999
64	0.348					32	0.123999
65	0.188					33	0.395
66	0.232					33	0.528
67	0.328					34	0.399
68	0.132					34	0.444
69	0.258					35	0.104999
70	0.418					35	0.120999
71	0.426					36	0.228
72	0.5428					36	0.274
73	0.29					37	0.593999
74	0.332					37	0.738999
75	0.156					38	0.539
76	0.478					38	0.681
77	0.332					39	0.557
78	0.894					39	0.761
79	0.442					40	0.261
80	0.232					40	0.382
81	0.1398					41	0.581999
82	0.33					41	0.832999
83	0.7884					42	0.55
84	0.1174					42	0.925
85	0.462					43	0.287999
86	0.9522					43	0.389
87	1.5742					44	0.334
88	0.3522					44	0.985999
89	0.26					45	0.813999
90	0.156					45	0.995999
91	0.162					46	0.11
92	0.2954					46	0.275
93	1.458					47	0.343999
94	0.179					47	0.603999
95	0.5412					48	0.352999
96	0.3842					48	0.454
97	0.5026					49	0.355999
98	0.154					49	0.479999
99	1.2022					50	0.384
100	0.487					50	0.523
101	0.3786					51	0.122999
102	0.2986					51	0.171999
103	0.4334					52	0.496999
104	0.334					52	0.590999
105	0.7284					53	0.169
106	0.862					53	0.294999
107	0.8022					54	0.468
108	0.8394					54	0.75
109	0.5338					55	0.240999
110	0.2226					55	0.308999
111	0.7932					56	1.2
112	0.2652					56	1.8
113	0.3484					57	0.13
114	0.4062					57	0.19
115	0.7216					58	0.25
116	0.5					58	0.28
117	0.6562					59	0.832999
118	0.5532					59	0.894
119	0.659					60	0.26
120	0.48					60	0.299999
121	0.8918					61	0.487999
122	0.8494					61	0.579999
123	0.2418					62	0.16
124	1.121					62	0.179999
125	0.434					63	0.23
126	1.2012					63	0.26
127	0.4032					64	0.309999
128	0.277					64	0.369999
129	0.648					65	0.16
130	0.9666					65	0.22
131	0.6106					66	0.22
132	0.3836					66	0.239999
133	0.2404					67	0.25
134	0.1366					67	0.409999
135	0.189					68	0.119999
136	0.1568					68	0.149999
137	0.1424					69	0.239999
138	0.0826					69	0.28
139	0.2164					70	0.4
140	0.3148					70	0.44
141	0.1098					71	0.4
142	0.2244					71	0.44
143	0.1342					72	0.463
144	0.1904					72	0.628
145	0.2018					73	0.25
146	0.4436					73	0.32
147	0.6496					74	0.289999
148	0.35					74	0.369999
149	0.57					75	0.14
150	0.5484					75	0.19
151	0.7956					76	0.44
152	0.5026					76	0.53
153	0.77504					77	0.299999
154	1.0272					77	0.349999
155	0.326					78	0.849999
156	0.518					78	0.92
157	0.2328					79	0.39
158	0.2966					79	0.5
159	0.3266					80	0.209999
160	0.6098					80	0.27
161	0.4162					81	0.129
162	0.529					81	0.155999
163	0.4002					82	0.309999
164	0.3092					82	0.359999
165	0.9242					83	0.663
166	1.2154					83	0.878
167	0.368					84	0.106999
168	0.212					84	0.135
169	0.132					85	0.38
170	0.312					85	0.55
171	0.17					86	0.894
172	0.1594					86	1.038
173	0.203					87	1.2
174	0.8292					87	1.965
175	0.3176					88	0.290999
176	0.202					88	0.428999
177	0.183					89	0.239999
178	0.244					89	0.289999
179	0.3678					90	0.14
180	0.36					90	0.17
181	0.3936					91	0.13
182	0.379					91	0.209999
183	0.309					92	0.240999
184	0.342					92	0.387
185	0.1082					93	1.4
						93	1.55
						94	0.155999
						94	0.199
						95	0.472999
						95	0.590999
						96	0.307999
						96	0.455
						97	0.415999
						97	0.574999
						98	0.13
						98	0.179999
						99	1.124
						99	1.331
						100	0.395
						100	0.562
						101	0.334
						101	0.445
						102	0.287999
						102	0.305999
						103	0.368999
						103	0.518
						104	0.299999
						104	0.369999
						105	0.674
						105	0.762
						106	0.816999
						106	0.894
						107	0.784
						107	0.832999
						108	0.769
						108	0.868999
						109	0.32
						109	0.877
						110	0.169
						110	0.267
						111	0.720999
						111	0.853999
						112	0.237999
						112	0.282999
						113	0.323
						113	0.372999
						114	0.391
						114	0.438
						115	0.637
						115	0.796
						116	0.488999
						116	0.518
						117	0.616999
						117	0.697999
						118	0.488999
						118	0.588999
						119	0.594999
						119	0.714999
						120	0.438
						120	0.562
						121	0.817999
						121	0.942999
						122	0.720999
						122	0.995999
						123	0.227
						123	0.27
						124	1.046
						124	1.228
						125	0.393
						125	0.458
						126	0.731999
						126	1.415
						127	0.387
						127	0.413999
						128	0.268
						128	0.290999
						129	0.608999
						129	0.679
						130	0.892
						130	1.036
						131	0.543
						131	0.706999
						132	0.358999
						132	0.418999
						133	0.233
						133	0.252
						134	0.128
						134	0.150999
						135	0.171999
						135	0.219
						136	0.144999
						136	0.168
						137	0.133
						137	0.155999
						138	0.068
						138	0.094
						139	0.205999
						139	0.251
						140	0.257
						140	0.362999
						141	0.1
						141	0.120999
						142	0.210999
						142	0.267
						143	0.102999
						143	0.145999
						144	0.162
						144	0.22
						145	0.174999
						145	0.22
						146	0.404
						146	0.484999
						147	0.598999
						147	0.693999
						148	0.32
						148	0.39
						149	0.479999
						149	0.63
						150	0.386
						150	0.714999
						151	0.778
						151	0.808
						152	0.414999
						152	0.716999
						153	0.7025
						153	0.9444
						154	0.943999
						154	1.143
						155	0.289999
						155	0.349999
						156	0.429999
						156	0.599999
						157	0.19
						157	0.265
						158	0.258
						158	0.318
						159	0.314
						159	0.338
						160	0.479999
						160	0.689999
						161	0.394
						161	0.436999
						162	0.495999
						162	0.577999
						163	0.202
						163	0.479999
						164	0.304999
						164	0.311999
						165	0.792
						165	0.973999
						166	1.033
						166	1.409
						167	0.32
						167	0.39
						168	0.19
						168	0.22
						169	0.11
						169	0.149999
						170	0.28
						170	0.33
						171	0.16
						171	0.19
						172	0.148999
						172	0.171999
						173	0.180999
						173	0.253
						174	0.63
						174	1.073
						175	0.258
						175	0.370999
						176	0.17
						176	0.28
						177	0.153999
						177	0.203999
						178	0.22
						178	0.26
						179	0.342
						179	0.386
						180	0.32
						180	0.409999
						181	0.318
						181	0.432999
						182	0.34
						182	0.410999
						183	0.295999
						183	0.332
						184	0.299999
						184	0.4
						185	0.097
						185	0.118999

## Sheet: RRX_HID25
1.12437	0.195	2	0.312	3	0.773	4	0.227	5	0.897	6	0.404	7.12903	0.428	8	0.487	9	0.317	10	0.885	11	0.298	12	0.2	13	0.263	14	2.978	15	0.295	16	0.206	17	0.174	18	0.345	19	0.539	20.2156	0.384	21	0.438	22	0.407	23	1.186	24	0.067	25	0.345
1.11927	0.198	2	0.34	3	0.798	4	0.246	5	0.923	6	0.43	6.8332	0.429	8	0.501	9	0.327	10	0.899	11	0.384	12	0.208	13	0.294	14	3.125	15	0.324	16	0.209	17	0.175	18	0.358	19	0.552	19.9798	0.386	21	0.506	22.2242	0.426	23	1.609	24	0.078	25	0.352
1	0.204	2	0.385	3	0.81	4	0.251	5	0.947	6	0.448	7	0.459	8	0.553	9	0.36	10	0.986	11	0.388	12	0.218	13	0.325	14	3.392	15	0.328	16	0.22	17	0.189	18	0.36	19	0.554	20	0.432	21	0.538	22.0463	0.426	23	1.632	24	0.131	25	0.371
0.806062	0.206	2	0.391	3	0.838	4	0.257	5	0.955	6	0.546	7	0.471	8	0.589	9	0.377	10	1.02	11	0.401	12	0.223	13	0.35	14	3.44	15	0.358	16	0.223	17	0.194	18	0.366	19	0.578	20	0.459	21	0.703	22	0.444	23	1.854	24	0.139	25	0.403
1.20749	0.213	2	0.406	3	0.846	4	0.266	5	1.008	6	0.57	7	0.486	8	0.594	9	0.399	10	1.107	11	0.406	12	0.249	13	0.364	14	3.546	15	0.362	16	0.275	17	0.226	18	0.408	19	0.579	20	0.492	21	0.881	22	0.453	23	2.109	24	0.152	25	0.464
[truncated: 206 more columns]

## Sheet: RRX_HID26
1	0.2084	5	0.826	5	0.878	1	0.185999
2	0.3312	9	0.323	9	0.347	1	0.232
3	0.7966	12	0.225	12	0.293	2	0.313
4	0.2302	14	3.106	27	0.45	2	0.352999
5	0.8484	19	0.646	36	0.271	3	0.730999
6	0.4324	21	0.771	51	0.218	3	0.871999
7	0.3782	24	0.073	58	0.29	4	0.193
8	0.5322	24	0.25	76	0.53	4	0.275
9	0.3308	26	0.367	79	0.44	5	0.825999
10	0.8816	27	0.42	81	0.191	5	0.878
11	0.3556	34	0.488	90	0.11	6	0.393
12	0.2526	39	0.561	90	0.17	6	0.472999
13	0.3316	51	0.133	94	0.235	7	0.346999
14	2.544	55	0.465	98	0.18	7	0.406
15	0.3114	57	0.16	98	0.24	8	0.496999
16	0.183	60	0.32	104	0.46	8	0.561
17	0.199	68	0.15	104	0.58	9	0.323
18	0.3576	77	0.56	105	0.864	9	0.346999
19	0.673	97	0.68	115	0.566	10	0.796
20	0.3914	99	1.24	115	0.731	10	0.995999
21	0.6332	100	0.704	120	0.623	11	0.319
22	0.7462	102	0.242	122	0.718	11	0.391
23	2.9556	105	1.26	122	0.86	12	0.225
24	0.1592	109	0.713	124	0.833	12	0.292999
25	0.4456	119	0.652	125	0.445	13	0.316
26	0.3362	119	0.779	128	0.337	13	0.345999
27	0.4314	129	0.603	132	0.688	14	2.259
28	0.3344	133	0.262	138	0.137	14	3.106
29	0.156	135	0.259	140	0.353	15	0.293999
30	0.2962	137	0.15	142	0.226	15	0.325
31	0.1402	138	0.106	163	0.378	16	0.148999
32	0.1036	139	0.193	165	0.763	16	0.219
33	0.4778	141	0.084	165	1.031	17	0.182999
34	0.4424	146	0.587	166	0.863	17	0.222
35	0.165	149	0.51	179	0.336	18	0.303999
36	0.2146	149	0.72			18	0.399
37	0.802	150	0.48			19	0.646
38	0.7978	151	0.979			19	0.687999
39	0.5966	158	0.46			20	0.343999
40	0.5984	161	0.537			20	0.447
41	0.8504	170	0.3			21	0.574999
42	0.5696	170	0.38			21	0.771
43	0.6244	174	0.967			22	0.605999
44	0.93	177	0.198			22	0.888
45	0.8968	179	0.289			23	2.746
46	0.5428	182	0.333			23	3.052
47	0.484	182	0.397			24	0.072999
48	0.6796					24	0.25
49	0.6652					25	0.381
50	0.7266					25	0.512
51	0.1688					26	0.319
52	0.519					26	0.366999
53	0.2928					27	0.419999
54	0.7288					27	0.45
55	0.3432					28	0.324
56	0.7514					28	0.343
57	0.19					29	0.14
58	0.306					29	0.166
59	1.1454					30	0.262
60	0.296					30	0.321
61	0.701					31	0.112
62	0.192					31	0.154999
63	0.224					32	0.081
64	0.444					32	0.133
65	0.306					33	0.445
66	0.238					33	0.508
67	0.41					34	0.403
68	0.174					34	0.487999
69	0.34					35	0.125
70	0.454					35	0.193
71	0.422					36	0.19
72	0.5822					36	0.271
73	0.26					37	0.762
74	0.434					37	0.834999
75	0.208					38	0.687999
76	0.56					38	0.980999
77	0.386					39	0.561
78	0.952					39	0.619999
79	0.364					40	0.524
80	0.252					40	0.665
81	0.17					41	0.814999
82	0.35					41	0.897
83	1.0072					42	0.467
84	0.1436					42	0.702999
85	0.542					43	0.406
86	1.1082					43	0.741999
87	1.6662					44	0.777
88	0.2472					44	1.156
89	0.284					45	0.706999
90	0.146					45	1.222
91	0.192					46	0.459
92	0.6782					46	0.603999
93	1.01					47	0.354999
94	0.2578					47	0.657
95	0.4378					48	0.517
96	0.4092					48	0.989999
97	0.495					49	0.541
98	0.21					49	0.766
99	0.9726					50	0.656
100	0.601					50	0.78
101	0.773					51	0.133
102	0.2712					51	0.217999
103	0.874					52	0.463
104	0.51					52	0.580999
105	1.0932					53	0.253
106	0.7818					53	0.327
107	1.0192					54	0.672
108	1.17836					54	0.797
109	0.6788					55	0.291999
110	0.199					55	0.465
111	0.777					56	0.675
112	0.2772					56	0.828999
113	0.3376					57	0.16
114	0.4616					57	0.209999
115	0.6516					58	0.289999
116	0.5248					58	0.309999
117	0.703					59	1.127
118	0.5964					59	1.169
119	0.7128					60	0.28
120	0.5					60	0.32
121	0.9062					61	0.632
122	0.764					61	0.782
123	0.2658					62	0.179999
124	1.0724					62	0.209999
125	0.5938					63	0.209999
126	1.1272					63	0.25
127	0.6176					64	0.429999
128	0.333					64	0.46
129	0.7206					65	0.28
130	1.2144					65	0.33
131	1.1496					66	0.22
132	0.5056					66	0.25
133	0.28					67	0.359999
134	0.138					67	0.44
135	0.269					68	0.149999
136	0.1422					68	0.19
137	0.1644					69	0.289999
138	0.1136					69	0.38
139	0.2156					70	0.44
140	0.3014					70	0.46
141	0.1524					71	0.39
142	0.2502					71	0.45
143	0.1598					72	0.543
144	0.1784					72	0.625
145	0.2486					73	0.23
146	0.4906					73	0.289999
147	0.524					74	0.34
148	0.284					74	0.479999
149	0.614					75	0.179999
150	0.523					75	0.23
151	0.82					76	0.53
152	0.659					76	0.579999
153	0.77876					77	0.28
154	1.2668					77	0.56
155	0.394					78	0.849999
156	0.76					78	1.08
157	0.2792					79	0.32
158	0.3964					79	0.44
159	0.3872					80	0.2
160	0.6774					80	0.289999
161	0.406					81	0.16
162	0.541					81	0.191
163	0.5402					82	0.34
164	0.336					82	0.369999
165	0.8938					83	0.813999
166	1.1214					83	1.208
167	0.356					84	0.088999
168	0.296					84	0.188
169	0.154					85	0.5
170	0.34					85	0.579999
171	0.202					86	0.89
172	0.153					86	1.242
173	0.2362					87	1.471
174	0.8208					87	1.861
175	0.2794					88	0.189
176	0.252					88	0.329
177	0.1814					89	0.239999
178	0.242					89	0.33
179	0.3062					90	0.11
180	0.438					90	0.17
181	0.389					91	0.179999
182	0.3648					91	0.2
183	0.4432					92	0.592999
184	0.532					92	0.742999
185	0.1278					93	0.9
						93	1.08
						94	0.234999
						94	0.267
						95	0.386
						95	0.491999
						96	0.335
						96	0.492999
						97	0.413999
						97	0.68
						98	0.179999
						98	0.239999
						99	0.79
						99	1.24
						100	0.512
						100	0.703999
						101	0.719999
						101	0.824999
						102	0.241999
						102	0.289999
						103	0.686
						103	1.024
						104	0.46
						104	0.579999
						105	0.863999
						105	1.26
						106	0.465
						106	1.162
						107	0.842999
						107	1.163
						108	1.003
						108	1.33
						109	0.65
						109	0.712999
						110	0.166
						110	0.228
						111	0.675
						111	0.916
						112	0.258
						112	0.300999
						113	0.322
						113	0.350999
						114	0.436999
						114	0.488999
						115	0.565999
						115	0.730999
						116	0.488999
						116	0.555
						117	0.659
						117	0.757
						118	0.521
						118	0.656
						119	0.652
						119	0.779
						120	0.45
						120	0.622999
						121	0.855999
						121	0.950999
						122	0.717999
						122	0.859999
						123	0.262
						123	0.271
						124	0.832999
						124	1.166
						125	0.445
						125	0.647
						126	0.588999
						126	1.427
						127	0.453
						127	0.766
						128	0.331
						128	0.337
						129	0.602999
						129	0.785
						130	1.103
						130	1.389
						131	1.083
						131	1.221
						132	0.423999
						132	0.687999
						133	0.262
						133	0.288999
						134	0.129
						134	0.152999
						135	0.259
						135	0.277
						136	0.125
						136	0.159
						137	0.149999
						137	0.171
						138	0.105999
						138	0.137
						139	0.193
						139	0.231
						140	0.268
						140	0.352999
						141	0.084
						141	0.192
						142	0.226
						142	0.261
						143	0.134
						143	0.185999
						144	0.158
						144	0.201
						145	0.23
						145	0.27
						146	0.408999
						146	0.586999
						147	0.46
						147	0.575999
						148	0.27
						148	0.299999
						149	0.51
						149	0.719999
						150	0.479999
						150	0.543
						151	0.733999
						151	0.978999
						152	0.577999
						152	0.78
						153	0.699
						153	0.837199
						154	1.125
						154	1.411
						155	0.359999
						155	0.419999
						156	0.56
						156	0.88
						157	0.232
						157	0.313
						158	0.357999
						158	0.46
						159	0.368999
						159	0.414999
						160	0.52
						160	0.831999
						161	0.334
						161	0.537
						162	0.507
						162	0.564999
						163	0.378
						163	0.641
						164	0.291999
						164	0.373999
						165	0.763
						165	1.031
						166	0.862999
						166	1.233
						167	0.299999
						167	0.4
						168	0.23
						168	0.34
						169	0.149999
						169	0.16
						170	0.299999
						170	0.38
						171	0.19
						171	0.209999
						172	0.148999
						172	0.158
						173	0.224
						173	0.244999
						174	0.729999
						174	0.966999
						175	0.217999
						175	0.311999
						176	0.23
						176	0.28
						177	0.173999
						177	0.198
						178	0.209999
						178	0.28
						179	0.288999
						179	0.336
						180	0.4
						180	0.469999
						181	0.354999
						181	0.430999
						182	0.333
						182	0.397
						183	0.412999
						183	0.477999
						184	0.38
						184	0.739999
						185	0.111
						185	0.14

## Sheet: RRX_HID27
1	0.186	2	0.313	3	0.731	4	0.193	5	0.826	5.7768	0.393	7	0.347	8	0.497	9	0.323	10	0.796	11	0.319	12	0.225	13	0.316	14	2.259	15	0.294	16	0.149	17	0.183	18	0.304	19	0.646	20	0.344	21	0.575	22	0.606	23	2.746	24	0.073	25	0.381
0.946813	0.196	2	0.319	3	0.742	4	0.217	5	0.843	6.11678	0.394	7	0.365	8	0.513	9	0.327	10	0.807	11	0.333	12	0.242	13	0.325	14	2.298	15	0.299	16	0.168	17	0.185	18	0.329	19	0.67	20	0.36	21	0.587	22	0.62	23	2.919	24	0.143	25	0.397
0.881063	0.21	2	0.322	3	0.766	4	0.225	5	0.845	6	0.45	7	0.374	8	0.542	9	0.328	10	0.875	11	0.356	12	0.25	13	0.33	14	2.458	15	0.317	16	0.18	17	0.198	18	0.376	19	0.676	20	0.4	21	0.593	22	0.761	23	3.015	24	0.156	25	0.444
1.04459	0.218	2	0.349	2.82999	0.872	4	0.241	5	0.85	6	0.452	7	0.399	8	0.548	9	0.329	10	0.934	11	0.379	12	0.253	13	0.341	14	2.599	15	0.322	16	0.199	17	0.207	18	0.38	19	0.685	20	0.406	21	0.64	22	0.856	23	3.046	24	0.174	25	0.494
1.08641	0.232	2	0.353	2.81344	0.872	4	0.275	5	0.878	6	0.473	7	0.406	8	0.561	9	0.347	10	0.996	11	0.391	12	0.293	13	0.346	14	3.106	15	0.325	16	0.219	17	0.222	18	0.399	19	0.688	20	0.447	21	0.771	22	0.888	23	3.052	24	0.25	25	0.512
[truncated: 206 more columns]

## Sheet: RRX (ASC diam)
	XLSTAT 2018.1.1.62926 - Gage R&R / Quantitative - Start time: 04/05/2021 at 18:39:52
	Y / Measurements: Workbook = Supplementary-data-repeatability-analysis.xlsx / Sheet = Sheet1 / Range = Sheet1!$D$1:$D$926 / 925 rows and 1 column
	X / Operators: Workbook = Supplementary-data-repeatability-analysis.xlsx / Sheet = Sheet1 / Range = 'Sheet1'!$B$1:$B$926 / 925 rows and 1 column
	Parts: Workbook = Supplementary-data-repeatability-analysis.xlsx / Sheet = Sheet1 / Range = 'Sheet1'!$A$1:$A$926 / 925 rows and 1 column
	k Sigma: 6
	Method for sigma (subgroups): R bar
	Method: ANOVA (Crossed)
	Significance level (%): 5
	Variance components:
	Source	Gage R&R	Repeatability	Reproducibility	Between parts
	Contribution	0.0562392	0.0562392	0	0.943761
	Study Variation (SV)	0.237148	0.237148	0	0.971473
	Variance:
	Source	Variance components	Contribution
	Gage R&R	0.00569478	0.0562392
	Repeatability	0.00569478	0.0562392
	Reproducibility	0	0
	Operators	0	0
	Operators * Parts	0	0
	Between parts	0.0955651	0.943761
	Total	0.10126	1
	Standard deviation:
	Source	Standard deviation	Study Variation (SV)	Study Variation (SV) %
	Gage R&R	0.0754637	0.452782	0.237148
	Repeatability	0.0754637	0.452782	0.237148
	Reproducibility	0	0	0
	Operators	0	0	0
	Operators * Parts	0	0	0
	Between parts	0.309136	1.85482	0.971473
	Total	0.318214	1.90928	1
	Status indicator:
		Value	Status
	Precision to tolerance ratio (P/T)
	Rho P	0.943761
	Rho M	0.0562392
	Signal to noise ratio (SNR)	5.7933	adequate (>+5)
	Discrimination ratio (DR)	34.5624
	Bias
	Bias %
	Resolution
	Removed variables :
	Variable	Reason
	Operator	Constant
	Specimens*Operator	The variable or the interaction of the corresponding column has no significant effect on the dependent variables.
	Goodness of fit statistics:
	Observations	925
	Sum of weights	925
	DF	740
	R²	0.954775
	Adjusted R²	0.94353
	MSE	0.00569478
	RMSE	0.0754637
	Analysis of variance:
	Source	DF	Sum of squares	Mean squares	F	Pr > F
	Parts	184	88.9677	0.48352	84.9059	< 0,0001
	Operators	0	0
	Operators * Parts
	Repeatability	740	4.21414	0.00569478
	Total	924	93.1818
	X-bar chart (control limits):
		1
	UCL	0.613453
	CL	0.466068
	LCL	0.318683
	X-bar chart (Observation details):
		Phase	Subgroup size	Mean	Minimum	Maximum	CL	LCL	UCL	C Lower bound	C Upper bound	B Lower bound	B Upper bound
	1 | FMNH 201350	1	5	0.404	0.38	0.43	0.466068	0.318683	0.613453	0.41694	0.515197	0.367811	0.564325
	1 | FMNH 250439	1	5	0.19	0.16	0.21	0.466068	0.318683	0.613453	0.41694	0.515197	0.367811	0.564325
	1 | FMNH 165622	1	5	0.306	0.27	0.35	0.466068	0.318683	0.613453	0.41694	0.515197	0.367811	0.564325
	1 | CAS 126478	1	5	0.16	0.15	0.17	0.466068	0.318683	0.613453	0.41694	0.515197	0.367811	0.564325
	1 | FMNH 31182	1	5	0.368	0.33	0.42	0.466068	0.318683	0.613453	0.41694	0.515197	0.367811	0.564325
	1 | FMNH 260015	1	5	0.432	0.42	0.44	0.466068	0.318683	0.613453	0.41694	0.515197	0.367811	0.564325
	1 | UMMZ 190285	1	5	0.366	0.35	0.38	0.466068	0.318683	0.613453	0.41694	0.515197	0.367811	0.564325
	1 | FMNH 47572	1	5	0.406	0.32	0.47	0.466068	0.318683	0.613453	0.41694	0.515197	0.367811	0.564325
	1 | FMNH 71626	1	5	0.314	0.25	0.34	0.466068	0.318683	0.613453	0.41694	0.515197	0.367811	0.564325
	1 | YPM 12670	1	5	0.22	0.21	0.23	0.466068	0.318683	0.613453	0.41694	0.515197	0.367811	0.564325
	1 | FMNH 60958	1	5	0.258	0.24	0.27	0.466068	0.318683	0.613453	0.41694	0.515197	0.367811	0.564325
	1 | USNM 128679	1	5	0.134	0.13	0.15	0.466068	0.318683	0.613453	0.41694	0.515197	0.367811	0.564325
	1 | FMNH 221322	1	5	0.238	0.22	0.25	0.466068	0.318683	0.613453	0.41694	0.515197	0.367811	0.564325
	1 | CMNH 67524	1	5	0.35	0.33	0.39	0.466068	0.318683	0.613453	0.41694	0.515197	0.367811	0.564325
	1 | FMNH 120968	1	5	0.156	0.13	0.17	0.466068	0.318683	0.613453	0.41694	0.515197	0.367811	0.564325
	1 | FMNH 186818	1	5	0.268	0.25	0.29	0.466068	0.318683	0.613453	0.41694	0.515197	0.367811	0.564325
	1 | TNHC 64380	1	5	0.566	0.53	0.6	0.466068	0.318683	0.613453	0.41694	0.515197	0.367811	0.564325
	1 | YPM 12858	1	5	0.218	0.19	0.26	0.466068	0.318683	0.613453	0.41694	0.515197	0.367811	0.564325
	1 | FMNH 148589	1	5	0.362	0.32	0.41	0.466068	0.318683	0.613453	0.41694	0.515197	0.367811	0.564325
	1 | FMNH 202810	1	5	0.408	0.4	0.43	0.466068	0.318683	0.613453	0.41694	0.515197	0.367811	0.564325
	1 | USNM 260564	1	5	0.16	0.13	0.19	0.466068	0.318683	0.613453	0.41694	0.515197	0.367811	0.564325
	1 | LACM 136359	1	5	0.206	0.16	0.24	0.466068	0.318683	0.613453	0.41694	0.515197	0.367811	0.564325
	1 | MVZ 125659	1	5	0.196	0.18	0.23	0.466068	0.318683	0.613453	0.41694	0.515197	0.367811	0.564325
	1 | USNM 200767	1	5	0.336	0.31	0.38	0.466068	0.318683	0.613453	0.41694	0.515197	0.367811	0.564325
	1 | YPM 12870	1	5	0.432	0.4	0.46	0.466068	0.318683	0.613453	0.41694	0.515197	0.367811	0.564325
	1 | FMNH 122866	1	5	0.188	0.17	0.21	0.466068	0.318683	0.613453	0.41694	0.515197	0.367811	0.564325
	1 | YPM 9194	1	5	0.504	0.44	0.59	0.466068	0.318683	0.613453	0.41694	0.515197	0.367811	0.564325
	1 | CAS 171013	1	5	0.306	0.26	0.33	0.466068	0.318683	0.613453	0.41694	0.515197	0.367811	0.564325
	1 | TNHC 64040	1	5	0.338	0.31	0.38	0.466068	0.318683	0.613453	0.41694	0.515197	0.367811	0.564325
	1 | FMNH 22416	1	5	0.374	0.33	0.45	0.466068	0.318683	0.613453	0.41694	0.515197	0.367811	0.564325
	1 | USNM 12378	1	5	0.204	0.18	0.22	0.466068	0.318683	0.613453	0.41694	0.515197	0.367811	0.564325
	1 | FMNH 78661	1	5	0.43	0.41	0.44	0.466068	0.318683	0.613453	0.41694	0.515197	0.367811	0.564325
	1 | FMNH 167048	1	5	0.138	0.13	0.16	0.466068	0.318683	0.613453	0.41694	0.515197	0.367811	0.564325
	1 | FMNH 35144	1	5	0.954	0.83	1.07	0.466068	0.318683	0.613453	0.41694	0.515197	0.367811	0.564325
	1 | FMNH 158613	1	5	0.222	0.21	0.24	0.466068	0.318683	0.613453	0.41694	0.515197	0.367811	0.564325
	1 | FMNH 148900	1	5	0.272	0.19	0.34	0.466068	0.318683	0.613453	0.41694	0.515197	0.367811	0.564325
	1 | 1930.5.8.725	1	5	0.4632	0.363	0.551	0.466068	0.318683	0.613453	0.41694	0.515197	0.367811	0.564325
	1 | Brochu 1999 monograph	1	5	1.2246	1.086	1.367	0.466068	0.318683	0.613453	0.41694	0.515197	0.367811	0.564325
	1 | 1964.1782	1	5	0.4212	0.378	0.482	0.466068	0.318683	0.613453	0.41694	0.515197	0.367811	0.564325
	1 | 1964.179	1	5	0.221	0.204	0.234	0.466068	0.318683	0.613453	0.41694	0.515197	0.367811	0.564325
	1 | FRIM0026; Digimorph	1	5	0.1904	0.187	0.194	0.466068	0.318683	0.613453	0.41694	0.515197	0.367811	0.564325
	1 | S/1972.1.21	1	5	0.6374	0.617	0.682	0.466068	0.318683	0.613453	0.41694	0.515197	0.367811	0.564325
	1 | S/1987.27.1	1	5	0.5062	0.441	0.566	0.466068	0.318683	0.613453	0.41694	0.515197	0.367811	0.564325
	1 | S/2007.139.12	1	5	1.156	1.136	1.176	0.466068	0.318683	0.613453	0.41694	0.515197	0.367811	0.564325
	1 | FMNH 73711; Digimorph	1	5	0.804	0.648	0.896	0.466068	0.318683	0.613453	0.41694	0.515197	0.367811	0.564325
	1 | 1939.12.9.964	1	5	0.889	0.822	0.925	0.466068	0.318683	0.613453	0.41694	0.515197	0.367811	0.564325
	1 | 1930.5.8.952	1	5	0.3998	0.34	0.476	0.466068	0.318683	0.613453	0.41694	0.515197	0.367811	0.564325
	1 | YPM 12690; Digimorph	1	5	0.1936	0.184	0.204	0.466068	0.318683	0.613453	0.41694	0.515197	0.367811	0.564325
	1 | 1969.2864	1	5	2.2218	2.198	2.266	0.466068	0.318683	0.613453	0.41694	0.515197	0.367811	0.564325
	1 | UF22159; Digimorph	1	5	1.066	0.939	1.291	0.466068	0.318683	0.613453	0.41694	0.515197	0.367811	0.564325
	1 | 1859.9.6.393	1	5	0.7864	0.687	0.866	0.466068	0.318683	0.613453	0.41694	0.515197	0.367811	0.564325
	1 | S/1952.1.103	1	5	0.8108	0.78	0.864	0.466068	0.318683	0.613453	0.41694	0.515197	0.367811	0.564325
	1 | S/1979.66.160	1	5	0.6962	0.605	0.732	0.466068	0.318683	0.613453	0.41694	0.515197	0.367811	0.564325
	1 | USNM 547842; Digimorph	1	5	0.1528	0.137	0.158	0.466068	0.318683	0.613453	0.41694	0.515197	0.367811	0.564325
	1 | FMNH 75662	1	5	0.102	0.096	0.107	0.466068	0.318683	0.613453	0.41694	0.515197	0.367811	0.564325
	1 | FMNH59071	1	5	1.3656	1.095	1.477	0.466068	0.318683	0.613453	0.41694	0.515197	0.367811	0.564325
	1 | OUVC 10425	1	5	0.5446	0.384	0.794	0.466068	0.318683	0.613453	0.41694	0.515197	0.367811	0.564325
	1 | TMM M-4980	1	5	0.9096	0.827	1.045	0.466068	0.318683	0.613453	0.41694	0.515197	0.367811	0.564325
	1 | S/1995.11.1	1	5	0.9472	0.841	1.06	0.466068	0.318683	0.613453	0.41694	0.515197	0.367811	0.564325
	1 | S/1969.1.163	1	5	0.4318	0.408	0.496	0.466068	0.318683	0.613453	0.41694	0.515197	0.367811	0.564325
	1 | FMNH 64429; Digimorph	1	5	0.136	0.113	0.146	0.466068	0.318683	0.613453	0.41694	0.515197	0.367811	0.564325
	1 | S/2001.50.1	1	5	0.7782	0.741	0.833	0.466068	0.318683	0.613453	0.41694	0.515197	0.367811	0.564325
	1 | YPM 12668; Digimorph	1	5	0.2926	0.257	0.347	0.466068	0.318683	0.613453	0.41694	0.515197	0.367811	0.564325
	1 | 1792.568	1	5	0.3356	0.286	0.375	0.466068	0.318683	0.613453	0.41694	0.515197	0.367811	0.564325
	1 | TMM M-5490; Digimorph	1	5	0.7214	0.638	0.898	0.466068	0.318683	0.613453	0.41694	0.515197	0.367811	0.564325
	1 | 1983.65	1	5	0.3482	0.32	0.387	0.466068	0.318683	0.613453	0.41694	0.515197	0.367811	0.564325
	1 | 1964.1829	1	5	0.3216	0.299	0.343	0.466068	0.318683	0.613453	0.41694	0.515197	0.367811	0.564325
	1 | YPM 14379; Digimorph	1	5	0.3624	0.325	0.385	0.466068	0.318683	0.613453	0.41694	0.515197	0.367811	0.564325
	1 | 1978.346	1	5	0.2022	0.192	0.21	0.466068	0.318683	0.613453	0.41694	0.515197	0.367811	0.564325
	1 | TNHC 62766; Digimorph	1	5	0.5458	0.512	0.583	0.466068	0.318683	0.613453	0.41694	0.515197	0.367811	0.564325
	1 | YPM 14381; Digimorph	1	5	0.4352	0.391	0.481	0.466068	0.318683	0.613453	0.41694	0.515197	0.367811	0.564325
	1 | YPM 6057; Digimorph	1	5	0.4162	0.388	0.452	0.466068	0.318683	0.613453	0.41694	0.515197	0.367811	0.564325
	1 | 1970.1.20.135	1	5	0.2688	0.249	0.297	0.466068	0.318683	0.613453	0.41694	0.515197	0.367811	0.564325
	1 | S/1968.4.14	1	5	0.3136	0.299	0.324	0.466068	0.318683	0.613453	0.41694	0.515197	0.367811	0.564325
	1 | S/1966.51.59	1	5	0.2932	0.271	0.327	0.466068	0.318683	0.613453	0.41694	0.515197	0.367811	0.564325
	1 | 59.9.21.2	1	5	0.4172	0.373	0.491	0.466068	0.318683	0.613453	0.41694	0.515197	0.367811	0.564325
	1 | YPM 12868; Digimorph	1	5	0.359	0.318	0.438	0.466068	0.318683	0.613453	0.41694	0.515197	0.367811	0.564325
	1 | 1978.1441	1	5	0.2114	0.187	0.234	0.466068	0.318683	0.613453	0.41694	0.515197	0.367811	0.564325
	1 | S/1973.66.109	1	5	0.488	0.379	0.57	0.466068	0.318683	0.613453	0.41694	0.515197	0.367811	0.564325
	1 | 1900.9.22.15	1	5	0.2288	0.222	0.244	0.466068	0.318683	0.613453	0.41694	0.515197	0.367811	0.564325
	1 | TNHC 62769; Digimorph	1	5	0.7272	0.62	0.821	0.466068	0.318683	0.613453	0.41694	0.515197	0.367811	0.564325
	1 | NHM Unregistered Palaeontology Comparative Collection (6)9	1	5	0.2718	0.254	0.288	0.466068	0.318683	0.613453	0.41694	0.515197	0.367811	0.564325
	1 | S/1986.75.13	1	5	0.632	0.61	0.65	0.466068	0.318683	0.613453	0.41694	0.515197	0.367811	0.564325
	1 | LDUCZ x036	1	5	0.4636	0.324	0.615	0.466068	0.318683	0.613453	0.41694	0.515197	0.367811	0.564325
	1 | UF 21341	1	5	0.6983	0.6187	0.7837	0.466068	0.318683	0.613453	0.41694	0.515197	0.367811	0.564325
	1 | 1927.2.5.1	1	5	0.9896	0.914	1.081	0.466068	0.318683	0.613453	0.41694	0.515197	0.367811	0.564325
	1 | S/2002.46.1	1	5	0.25	0.227	0.288	0.466068	0.318683	0.613453	0.41694	0.515197	0.367811	0.564325
	1 | 29a	1	5	0.531	0.507	0.582	0.466068	0.318683	0.613453	0.41694	0.515197	0.367811	0.564325
	1 | USNM211322	1	5	0.175	0.157	0.181	0.466068	0.318683	0.613453	0.41694	0.515197	0.367811	0.564325
	1 | 1938.5.7.59	1	5	0.3192	0.3	0.341	0.466068	0.318683	0.613453	0.41694	0.515197	0.367811	0.564325
	1 | S/1981.39.1	1	5	0.637	0.602	0.681	0.466068	0.318683	0.613453	0.41694	0.515197	0.367811	0.564325
	1 | UCA.5; Digimorph	1	5	0.532	0.485	0.608	0.466068	0.318683	0.613453	0.41694	0.515197	0.367811	0.564325
	1 | 1932.6.1.12	1	5	0.5872	0.49	0.697	0.466068	0.318683	0.613453	0.41694	0.515197	0.367811	0.564325
	1 | 97.5.31.1	1	5	0.6758	0.566	0.813	0.466068	0.318683	0.613453	0.41694	0.515197	0.367811	0.564325
	1 | UCMZ R.9586	1	5	0.7538	0.652	0.907	0.466068	0.318683	0.613453	0.41694	0.515197	0.367811	0.564325
	1 | AM 6556	1	5	1.6458	1.561	1.892	0.466068	0.318683	0.613453	0.41694	0.515197	0.367811	0.564325
	1 | CG WB123	1	5	1.0238	0.709	1.58	0.466068	0.318683	0.613453	0.41694	0.515197	0.367811	0.564325
	1 | BP/1/3924	1	5	0.5618	0.511	0.583	0.466068	0.318683	0.613453	0.41694	0.515197	0.367811	0.564325
	1 | BP/1/816	1	5	0.587	0.517	0.711	0.466068	0.318683	0.613453	0.41694	0.515197	0.367811	0.564325
	1 | NMQR1702	1	5	1.2	1.021	1.399	0.466068	0.318683	0.613453	0.41694	0.515197	0.367811	0.564325
	1 | SAM-PK-11112	1	5	1.1598	0.84	1.342	0.466068	0.318683	0.613453	0.41694	0.515197	0.367811	0.564325
	1 | BP/1/155	1	5	0.73	0.625	0.903	0.466068	0.318683	0.613453	0.41694	0.515197	0.367811	0.564325
	1 | BP/1/216	1	5	0.6772	0.566	0.773	0.466068	0.318683	0.613453	0.41694	0.515197	0.367811	0.564325
	1 | SAM-PK-K 8797	1	5	0.4354	0.403	0.473	0.466068	0.318683	0.613453	0.41694	0.515197	0.367811	0.564325
	1 | SAM-PK-10160	1	5	0.5014	0.453	0.6	0.466068	0.318683	0.613453	0.41694	0.515197	0.367811	0.564325
	1 | NHMUK 5696	1	5	0.6368	0.503	0.852	0.466068	0.318683	0.613453	0.41694	0.515197	0.367811	0.564325
	1 | BP/1/4009	1	5	0.9352	0.801	1.092	0.466068	0.318683	0.613453	0.41694	0.515197	0.367811	0.564325
	1 | BP/1/3849	1	5	0.6786	0.552	0.832	0.466068	0.318683	0.613453	0.41694	0.515197	0.367811	0.564325
	1 | BP/1/1563	1	5	0.6466	0.572	0.751	0.466068	0.318683	0.613453	0.41694	0.515197	0.367811	0.564325
	1 | BP/1/3926	1	5	0.6326	0.447	0.847	0.466068	0.318683	0.613453	0.41694	0.515197	0.367811	0.564325
	1 | BP/1/4263	1	5	0.4108	0.234	0.625	0.466068	0.318683	0.613453	0.41694	0.515197	0.367811	0.564325
	1 | BP/1/7199	1	5	0.195	0.154	0.259	0.466068	0.318683	0.613453	0.41694	0.515197	0.367811	0.564325
	1 | NMQR860	1	5	0.7234	0.635	0.863	0.466068	0.318683	0.613453	0.41694	0.515197	0.367811	0.564325
	1 | AM 461	1	5	0.44	0.382	0.557	0.466068	0.318683	0.613453	0.41694	0.515197	0.367811	0.564325
	1 | BP/1/4658	1	5	0.512	0.445	0.583	0.466068	0.318683	0.613453	0.41694	0.515197	0.367811	0.564325
	1 | BP/1/4534	1	5	0.3746	0.274	0.49	0.466068	0.318683	0.613453	0.41694	0.515197	0.367811	0.564325
	1 | BP/1/2669	1	5	0.4858	0.39	0.698	0.466068	0.318683	0.613453	0.41694	0.515197	0.367811	0.564325
	1 | MS86	1	5	0.3634	0.318	0.424	0.466068	0.318683	0.613453	0.41694	0.515197	0.367811	0.564325
	1 | BP/4/908	1	5	0.233	0.216	0.254	0.466068	0.318683	0.613453	0.41694	0.515197	0.367811	0.564325
	1 | BP/1/4983	1	5	0.1962	0.129	0.287	0.466068	0.318683	0.613453	0.41694	0.515197	0.367811	0.564325
	1 | BP/1/4245	1	5	0.4332	0.374	0.482	0.466068	0.318683	0.613453	0.41694	0.515197	0.367811	0.564325
	1 | NHCC LB18	1	5	0.4496	0.393	0.493	0.466068	0.318683	0.613453	0.41694	0.515197	0.367811	0.564325
	1 | TMMM-150	1	5	0.2322	0.206	0.249	0.466068	0.318683	0.613453	0.41694	0.515197	0.367811	0.564325
	1 | TMM-M-7283	1	5	0.1102	0.096	0.122	0.466068	0.318683	0.613453	0.41694	0.515197	0.367811	0.564325
	1 | AMNH82372	1	5	0.2766	0.108	0.907	0.466068	0.318683	0.613453	0.41694	0.515197	0.367811	0.564325
	1 | AMNH187859	1	5	0.2954	0.251	0.352	0.466068	0.318683	0.613453	0.41694	0.515197	0.367811	0.564325
	1 | TMM-M-1885	1	5	0.2676	0.244	0.318	0.466068	0.318683	0.613453	0.41694	0.515197	0.367811	0.564325
	1 | TMM-M-2517	1	5	0.2296	0.208	0.259	0.466068	0.318683	0.613453	0.41694	0.515197	0.367811	0.564325
	1 | TMM-M-171	1	5	0.4216	0.372	0.46	0.466068	0.318683	0.613453	0.41694	0.515197	0.367811	0.564325
	1 | TMM-M-968	1	5	0.178	0.123	0.21	0.466068	0.318683	0.613453	0.41694	0.515197	0.367811	0.564325
	1 | AMNH161535	1	5	0.135	0.121	0.161	0.466068	0.318683	0.613453	0.41694	0.515197	0.367811	0.564325
	1 | UTO-HS01	1	5	0.9114	0.739	1.154	0.466068	0.318683	0.613453	0.41694	0.515197	0.367811	0.564325
	1 | TMM-M-7500	1	5	0.2082	0.203	0.214	0.466068	0.318683	0.613453	0.41694	0.515197	0.367811	0.564325
	1 | TMM-M-5987	1	5	0.3336	0.274	0.424	0.466068	0.318683	0.613453	0.41694	0.515197	0.367811	0.564325
	1 | AMNH53896	1	5	0.4304	0.424	0.439	0.466068	0.318683	0.613453	0.41694	0.515197	0.367811	0.564325
	1 | TMM-M-7599	1	5	0.1646	0.117	0.225	0.466068	0.318683	0.613453	0.41694	0.515197	0.367811	0.564325
	1 | TMM-M-3196	1	5	0.09672	0.087	0.12	0.466068	0.318683	0.613453	0.41694	0.515197	0.367811	0.564325
	1 | AMNH51909	1	5	0.4528	0.43	0.485	0.466068	0.318683	0.613453	0.41694	0.515197	0.367811	0.564325
	1 | TMM-M-4351	1	5	0.2118	0.196	0.233	0.466068	0.318683	0.613453	0.41694	0.515197	0.367811	0.564325
	1 | AMNH237593	1	5	0.1138	0.085	0.14	0.466068	0.318683	0.613453	0.41694	0.515197	0.367811	0.564325
	1 | AMNH245591	1	5	0.1038	0.094	0.119	0.466068	0.318683	0.613453	0.41694	0.515197	0.367811	0.564325
	1 | unvouchered	1	5	0.1138	0.105	0.123	0.466068	0.318683	0.613453	0.41694	0.515197	0.367811	0.564325
	1 | TMM-M-2689	1	5	0.1382	0.128	0.152	0.466068	0.318683	0.613453	0.41694	0.515197	0.367811	0.564325
	1 | TMM-M-3030	1	5	0.1416	0.132	0.152	0.466068	0.318683	0.613453	0.41694	0.515197	0.367811	0.564325
	1 | MSW03156	1	5	0.5474	0.465	0.648	0.466068	0.318683	0.613453	0.41694	0.515197	0.367811	0.564325
	1 | TMM-M-2256	1	5	0.1272	0.115	0.149	0.466068	0.318683	0.613453	0.41694	0.515197	0.367811	0.564325
	1 | SDNHM21212	1	5	0.2746	0.259	0.297	0.466068	0.318683	0.613453	0.41694	0.515197	0.367811	0.564325
	1 | IPHEP unvouchered	1	5	0.421	0.389	0.473	0.466068	0.318683	0.613453	0.41694	0.515197	0.367811	0.564325
	1 | UCR 3116	1	5	0.6192	0.466	0.774	0.466068	0.318683	0.613453	0.41694	0.515197	0.367811	0.564325
	1 | RMCA 83,001-M-0014	1	5	0.2042	0.153	0.239	0.466068	0.318683	0.613453	0.41694	0.515197	0.367811	0.564325
	1 | AMNH M 24289	1	5	0.2978	0.242	0.359	0.466068	0.318683	0.613453	0.41694	0.515197	0.367811	0.564325
	1 | AMNH M 53672	1	5	0.399	0.385	0.421	0.466068	0.318683	0.613453	0.41694	0.515197	0.367811	0.564325
	1 | UM N- 228	1	5	0.449	0.43	0.463	0.466068	0.318683	0.613453	0.41694	0.515197	0.367811	0.564325
	1 | AMNH unvouchered	1	5	0.3668	0.345	0.438	0.466068	0.318683	0.613453	0.41694	0.515197	0.367811	0.564325
	1 | UM N-671	1	5	0.4012	0.313	0.453	0.466068	0.318683	0.613453	0.41694	0.515197	0.367811	0.564325
	1 | AMNH M 2238	1	5	0.4208	0.401	0.458	0.466068	0.318683	0.613453	0.41694	0.515197	0.367811	0.564325
	1 | UM2 N-177	1	5	1.2746	1.094	1.419	0.466068	0.318683	0.613453	0.41694	0.515197	0.367811	0.564325
	1 | UM PDS 3360	1	5	0.3494	0.309	0.401	0.466068	0.318683	0.613453	0.41694	0.515197	0.367811	0.564325
	1 | UM ITD 1080	1	5	0.3356	0.267	0.429	0.466068	0.318683	0.613453	0.41694	0.515197	0.367811	0.564325
	1 | MNHN Qu1	1	5	0.5206	0.387	0.629	0.466068	0.318683	0.613453	0.41694	0.515197	0.367811	0.564325
	1 | UM N-170	1	5	0.445	0.416	0.472	0.466068	0.318683	0.613453	0.41694	0.515197	0.367811	0.564325
	1 | UM 58V	1	5	0.2318	0.207	0.274	0.466068	0.318683	0.613453	0.41694	0.515197	0.367811	0.564325
	1 | UM PV 251212	1	5	0.9066	0.827	0.941	0.466068	0.318683	0.613453	0.41694	0.515197	0.367811	0.564325
	1 | UM N 03	1	5	0.3418	0.304	0.406	0.466068	0.318683	0.613453	0.41694	0.515197	0.367811	0.564325
	1 | UM N 785V	1	5	0.5328	0.39	0.651	0.466068	0.318683	0.613453	0.41694	0.515197	0.367811	0.564325
	1 | AMNH 268369	1	5	0.1442	0.121	0.214	0.466068	0.318683	0.613453	0.41694	0.515197	0.367811	0.564325
	1 | TMM 40882-41	1	5	0.601	0.489	0.757	0.466068	0.318683	0.613453	0.41694	0.515197	0.367811	0.564325
	1 | BP/1/3575	1	5	0.7008	0.572	0.859	0.466068	0.318683	0.613453	0.41694	0.515197	0.367811	0.564325
	1 | NHMUK R37054	1	5	0.6294	0.537	0.84	0.466068	0.318683	0.613453	0.41694	0.515197	0.367811	0.564325
	1 | NHCC LB 117	1	5	0.9806	0.904	1.075	0.466068	0.318683	0.613453	0.41694	0.515197	0.367811	0.564325
	1 | NMT RB581	1	5	0.8086	0.712	0.889	0.466068	0.318683	0.613453	0.41694	0.515197	0.367811	0.564325
	1 | IVPP 8275	1	5	0.218	0.2	0.25	0.466068	0.318683	0.613453	0.41694	0.515197	0.367811	0.564325
	1 | IVPP 8685	1	5	0.14	0.13	0.15	0.466068	0.318683	0.613453	0.41694	0.515197	0.367811	0.564325
	1 | NHCC LB44	1	5	0.406	0.4	0.411	0.466068	0.318683	0.613453	0.41694	0.515197	0.367811	0.564325
	1 | FMNH 218598	1	5	0.5354	0.519	0.56	0.466068	0.318683	0.613453	0.41694	0.515197	0.367811	0.564325
	1 | FMNH 10694	1	5	0.6404	0.55	0.696	0.466068	0.318683	0.613453	0.41694	0.515197	0.367811	0.564325
	1 | BMNH 2858	1	5	0.2354	0.194	0.292	0.466068	0.318683	0.613453	0.41694	0.515197	0.367811	0.564325
	1 | BP/1/5088	1	5	0.4778	0.415	0.561	0.466068	0.318683	0.613453	0.41694	0.515197	0.367811	0.564325
	1 | BP/1/4778	1	5	0.4688	0.42	0.499	0.466068	0.318683	0.613453	0.41694	0.515197	0.367811	0.564325
	1 | FMNH UR 27	1	5	1.101	0.978	1.277	0.466068	0.318683	0.613453	0.41694	0.515197	0.367811	0.564325
	1 | MCZ 3778	1	5	0.696	0.63	0.76	0.466068	0.318683	0.613453	0.41694	0.515197	0.367811	0.564325
	1 | UFRGS PV833T	1	5	0.494	0.44	0.55	0.466068	0.318683	0.613453	0.41694	0.515197	0.367811	0.564325
	1 | UFRGS PV1043	1	5	0.274	0.24	0.33	0.466068	0.318683	0.613453	0.41694	0.515197	0.367811	0.564325
	1 | NHMUK 7090	1	5	0.32	0.28	0.36	0.466068	0.318683	0.613453	0.41694	0.515197	0.367811	0.564325
	1 | MG 6807 (Gui Mam 2/81)	1	5	0.2048	0.196	0.216	0.466068	0.318683	0.613453	0.41694	0.515197	0.367811	0.564325
	R chart (control limits):
		1
	UCL	0.412499
	CL	0.127757
	LCL	0
	R chart (Observation details):
		Phase	Subgroup size	Mean	Minimum	Maximum	CL	LCL	UCL	C Lower bound	C Upper bound	B Lower bound	B Upper bound
	1 | FMNH 201350	1	5	0.05	0.38	0.43	0.127757	0	0.412499	0.0851712	0.222671	0.0425856	0.317585
	1 | FMNH 250439	1	5	0.05	0.16	0.21	0.127757	0	0.412499	0.0851712	0.222671	0.0425856	0.317585
	1 | FMNH 165622	1	5	0.08	0.27	0.35	0.127757	0	0.412499	0.0851712	0.222671	0.0425856	0.317585
	1 | CAS 126478	1	5	0.02	0.15	0.17	0.127757	0	0.412499	0.0851712	0.222671	0.0425856	0.317585
	1 | FMNH 31182	1	5	0.09	0.33	0.42	0.127757	0	0.412499	0.0851712	0.222671	0.0425856	0.317585
	1 | FMNH 260015	1	5	0.02	0.42	0.44	0.127757	0	0.412499	0.0851712	0.222671	0.0425856	0.317585
	1 | UMMZ 190285	1	5	0.03	0.35	0.38	0.127757	0	0.412499	0.0851712	0.222671	0.0425856	0.317585
	1 | FMNH 47572	1	5	0.15	0.32	0.47	0.127757	0	0.412499	0.0851712	0.222671	0.0425856	0.317585
	1 | FMNH 71626	1	5	0.09	0.25	0.34	0.127757	0	0.412499	0.0851712	0.222671	0.0425856	0.317585
	1 | YPM 12670	1	5	0.02	0.21	0.23	0.127757	0	0.412499	0.0851712	0.222671	0.0425856	0.317585
	1 | FMNH 60958	1	5	0.03	0.24	0.27	0.127757	0	0.412499	0.0851712	0.222671	0.0425856	0.317585
	1 | USNM 128679	1	5	0.02	0.13	0.15	0.127757	0	0.412499	0.0851712	0.222671	0.0425856	0.317585
	1 | FMNH 221322	1	5	0.03	0.22	0.25	0.127757	0	0.412499	0.0851712	0.222671	0.0425856	0.317585
	1 | CMNH 67524	1	5	0.06	0.33	0.39	0.127757	0	0.412499	0.0851712	0.222671	0.0425856	0.317585
	1 | FMNH 120968	1	5	0.04	0.13	0.17	0.127757	0	0.412499	0.0851712	0.222671	0.0425856	0.317585
	1 | FMNH 186818	1	5	0.04	0.25	0.29	0.127757	0	0.412499	0.0851712	0.222671	0.0425856	0.317585
	1 | TNHC 64380	1	5	0.07	0.53	0.6	0.127757	0	0.412499	0.0851712	0.222671	0.0425856	0.317585
	1 | YPM 12858	1	5	0.07	0.19	0.26	0.127757	0	0.412499	0.0851712	0.222671	0.0425856	0.317585
	1 | FMNH 148589	1	5	0.09	0.32	0.41	0.127757	0	0.412499	0.0851712	0.222671	0.0425856	0.317585
	1 | FMNH 202810	1	5	0.03	0.4	0.43	0.127757	0	0.412499	0.0851712	0.222671	0.0425856	0.317585
	1 | USNM 260564	1	5	0.06	0.13	0.19	0.127757	0	0.412499	0.0851712	0.222671	0.0425856	0.317585
	1 | LACM 136359	1	5	0.08	0.16	0.24	0.127757	0	0.412499	0.0851712	0.222671	0.0425856	0.317585
	1 | MVZ 125659	1	5	0.05	0.18	0.23	0.127757	0	0.412499	0.0851712	0.222671	0.0425856	0.317585
	1 | USNM 200767	1	5	0.07	0.31	0.38	0.127757	0	0.412499	0.0851712	0.222671	0.0425856	0.317585
	1 | YPM 12870	1	5	0.06	0.4	0.46	0.127757	0	0.412499	0.0851712	0.222671	0.0425856	0.317585
	1 | FMNH 122866	1	5	0.04	0.17	0.21	0.127757	0	0.412499	0.0851712	0.222671	0.0425856	0.317585
	1 | YPM 9194	1	5	0.15	0.44	0.59	0.127757	0	0.412499	0.0851712	0.222671	0.0425856	0.317585
	1 | CAS 171013	1	5	0.07	0.26	0.33	0.127757	0	0.412499	0.0851712	0.222671	0.0425856	0.317585
	1 | TNHC 64040	1	5	0.07	0.31	0.38	0.127757	0	0.412499	0.0851712	0.222671	0.0425856	0.317585
	1 | FMNH 22416	1	5	0.12	0.33	0.45	0.127757	0	0.412499	0.0851712	0.222671	0.0425856	0.317585
	1 | USNM 12378	1	5	0.04	0.18	0.22	0.127757	0	0.412499	0.0851712	0.222671	0.0425856	0.317585
	1 | FMNH 78661	1	5	0.03	0.41	0.44	0.127757	0	0.412499	0.0851712	0.222671	0.0425856	0.317585
	1 | FMNH 167048	1	5	0.03	0.13	0.16	0.127757	0	0.412499	0.0851712	0.222671	0.0425856	0.317585
	1 | FMNH 35144	1	5	0.24	0.83	1.07	0.127757	0	0.412499	0.0851712	0.222671	0.0425856	0.317585
	1 | FMNH 158613	1	5	0.03	0.21	0.24	0.127757	0	0.412499	0.0851712	0.222671	0.0425856	0.317585
	1 | FMNH 148900	1	5	0.15	0.19	0.34	0.127757	0	0.412499	0.0851712	0.222671	0.0425856	0.317585
	1 | 1930.5.8.725	1	5	0.188	0.363	0.551	0.127757	0	0.412499	0.0851712	0.222671	0.0425856	0.317585
	1 | Brochu 1999 monograph	1	5	0.281	1.086	1.367	0.127757	0	0.412499	0.0851712	0.222671	0.0425856	0.317585
	1 | 1964.1782	1	5	0.104	0.378	0.482	0.127757	0	0.412499	0.0851712	0.222671	0.0425856	0.317585
	1 | 1964.179	1	5	0.03	0.204	0.234	0.127757	0	0.412499	0.0851712	0.222671	0.0425856	0.317585
	1 | FRIM0026; Digimorph	1	5	0.007	0.187	0.194	0.127757	0	0.412499	0.0851712	0.222671	0.0425856	0.317585
	1 | S/1972.1.21	1	5	0.065	0.617	0.682	0.127757	0	0.412499	0.0851712	0.222671	0.0425856	0.317585
	1 | S/1987.27.1	1	5	0.125	0.441	0.566	0.127757	0	0.412499	0.0851712	0.222671	0.0425856	0.317585
	1 | S/2007.139.12	1	5	0.04	1.136	1.176	0.127757	0	0.412499	0.0851712	0.222671	0.0425856	0.317585
	1 | FMNH 73711; Digimorph	1	5	0.248	0.648	0.896	0.127757	0	0.412499	0.0851712	0.222671	0.0425856	0.317585
	1 | 1939.12.9.964	1	5	0.103	0.822	0.925	0.127757	0	0.412499	0.0851712	0.222671	0.0425856	0.317585
	1 | 1930.5.8.952	1	5	0.136	0.34	0.476	0.127757	0	0.412499	0.0851712	0.222671	0.0425856	0.317585
	1 | YPM 12690; Digimorph	1	5	0.02	0.184	0.204	0.127757	0	0.412499	0.0851712	0.222671	0.0425856	0.317585
	1 | 1969.2864	1	5	0.068	2.198	2.266	0.127757	0	0.412499	0.0851712	0.222671	0.0425856	0.317585
	1 | UF22159; Digimorph	1	5	0.352	0.939	1.291	0.127757	0	0.412499	0.0851712	0.222671	0.0425856	0.317585
	1 | 1859.9.6.393	1	5	0.179	0.687	0.866	0.127757	0	0.412499	0.0851712	0.222671	0.0425856	0.317585
	1 | S/1952.1.103	1	5	0.084	0.78	0.864	0.127757	0	0.412499	0.0851712	0.222671	0.0425856	0.317585
	1 | S/1979.66.160	1	5	0.127	0.605	0.732	0.127757	0	0.412499	0.0851712	0.222671	0.0425856	0.317585
	1 | USNM 547842; Digimorph	1	5	0.021	0.137	0.158	0.127757	0	0.412499	0.0851712	0.222671	0.0425856	0.317585
	1 | FMNH 75662	1	5	0.011	0.096	0.107	0.127757	0	0.412499	0.0851712	0.222671	0.0425856	0.317585
	1 | FMNH59071	1	5	0.382	1.095	1.477	0.127757	0	0.412499	0.0851712	0.222671	0.0425856	0.317585
	1 | OUVC 10425	1	5	0.41	0.384	0.794	0.127757	0	0.412499	0.0851712	0.222671	0.0425856	0.317585
	1 | TMM M-4980	1	5	0.218	0.827	1.045	0.127757	0	0.412499	0.0851712	0.222671	0.0425856	0.317585
	1 | S/1995.11.1	1	5	0.219	0.841	1.06	0.127757	0	0.412499	0.0851712	0.222671	0.0425856	0.317585
	1 | S/1969.1.163	1	5	0.088	0.408	0.496	0.127757	0	0.412499	0.0851712	0.222671	0.0425856	0.317585
	1 | FMNH 64429; Digimorph	1	5	0.033	0.113	0.146	0.127757	0	0.412499	0.0851712	0.222671	0.0425856	0.317585
	1 | S/2001.50.1	1	5	0.092	0.741	0.833	0.127757	0	0.412499	0.0851712	0.222671	0.0425856	0.317585
	1 | YPM 12668; Digimorph	1	5	0.09	0.257	0.347	0.127757	0	0.412499	0.0851712	0.222671	0.0425856	0.317585
	1 | 1792.568	1	5	0.089	0.286	0.375	0.127757	0	0.412499	0.0851712	0.222671	0.0425856	0.317585
	1 | TMM M-5490; Digimorph	1	5	0.26	0.638	0.898	0.127757	0	0.412499	0.0851712	0.222671	0.0425856	0.317585
	1 | 1983.65	1	5	0.067	0.32	0.387	0.127757	0	0.412499	0.0851712	0.222671	0.0425856	0.317585
	1 | 1964.1829	1	5	0.044	0.299	0.343	0.127757	0	0.412499	0.0851712	0.222671	0.0425856	0.317585
	1 | YPM 14379; Digimorph	1	5	0.06	0.325	0.385	0.127757	0	0.412499	0.0851712	0.222671	0.0425856	0.317585
	1 | 1978.346	1	5	0.018	0.192	0.21	0.127757	0	0.412499	0.0851712	0.222671	0.0425856	0.317585
	1 | TNHC 62766; Digimorph	1	5	0.071	0.512	0.583	0.127757	0	0.412499	0.0851712	0.222671	0.0425856	0.317585
	1 | YPM 14381; Digimorph	1	5	0.09	0.391	0.481	0.127757	0	0.412499	0.0851712	0.222671	0.0425856	0.317585
	1 | YPM 6057; Digimorph	1	5	0.064	0.388	0.452	0.127757	0	0.412499	0.0851712	0.222671	0.0425856	0.317585
	1 | 1970.1.20.135	1	5	0.048	0.249	0.297	0.127757	0	0.412499	0.0851712	0.222671	0.0425856	0.317585
	1 | S/1968.4.14	1	5	0.025	0.299	0.324	0.127757	0	0.412499	0.0851712	0.222671	0.0425856	0.317585
	1 | S/1966.51.59	1	5	0.056	0.271	0.327	0.127757	0	0.412499	0.0851712	0.222671	0.0425856	0.317585
	1 | 59.9.21.2	1	5	0.118	0.373	0.491	0.127757	0	0.412499	0.0851712	0.222671	0.0425856	0.317585
	1 | YPM 12868; Digimorph	1	5	0.12	0.318	0.438	0.127757	0	0.412499	0.0851712	0.222671	0.0425856	0.317585
	1 | 1978.1441	1	5	0.047	0.187	0.234	0.127757	0	0.412499	0.0851712	0.222671	0.0425856	0.317585
	1 | S/1973.66.109	1	5	0.191	0.379	0.57	0.127757	0	0.412499	0.0851712	0.222671	0.0425856	0.317585
	1 | 1900.9.22.15	1	5	0.022	0.222	0.244	0.127757	0	0.412499	0.0851712	0.222671	0.0425856	0.317585
	1 | TNHC 62769; Digimorph	1	5	0.201	0.62	0.821	0.127757	0	0.412499	0.0851712	0.222671	0.0425856	0.317585
	1 | NHM Unregistered Palaeontology Comparative Collection (6)9	1	5	0.034	0.254	0.288	0.127757	0	0.412499	0.0851712	0.222671	0.0425856	0.317585
	1 | S/1986.75.13	1	5	0.04	0.61	0.65	0.127757	0	0.412499	0.0851712	0.222671	0.0425856	0.317585
	1 | LDUCZ x036	1	5	0.291	0.324	0.615	0.127757	0	0.412499	0.0851712	0.222671	0.0425856	0.317585
	1 | UF 21341	1	5	0.165	0.6187	0.7837	0.127757	0	0.412499	0.0851712	0.222671	0.0425856	0.317585
	1 | 1927.2.5.1	1	5	0.167	0.914	1.081	0.127757	0	0.412499	0.0851712	0.222671	0.0425856	0.317585
	1 | S/2002.46.1	1	5	0.061	0.227	0.288	0.127757	0	0.412499	0.0851712	0.222671	0.0425856	0.317585
	1 | 29a	1	5	0.075	0.507	0.582	0.127757	0	0.412499	0.0851712	0.222671	0.0425856	0.317585
	1 | USNM211322	1	5	0.024	0.157	0.181	0.127757	0	0.412499	0.0851712	0.222671	0.0425856	0.317585
	1 | 1938.5.7.59	1	5	0.041	0.3	0.341	0.127757	0	0.412499	0.0851712	0.222671	0.0425856	0.317585
	1 | S/1981.39.1	1	5	0.079	0.602	0.681	0.127757	0	0.412499	0.0851712	0.222671	0.0425856	0.317585
	1 | UCA.5; Digimorph	1	5	0.123	0.485	0.608	0.127757	0	0.412499	0.0851712	0.222671	0.0425856	0.317585
	1 | 1932.6.1.12	1	5	0.207	0.49	0.697	0.127757	0	0.412499	0.0851712	0.222671	0.0425856	0.317585
	1 | 97.5.31.1	1	5	0.247	0.566	0.813	0.127757	0	0.412499	0.0851712	0.222671	0.0425856	0.317585
	1 | UCMZ R.9586	1	5	0.255	0.652	0.907	0.127757	0	0.412499	0.0851712	0.222671	0.0425856	0.317585
	1 | AM 6556	1	5	0.331	1.561	1.892	0.127757	0	0.412499	0.0851712	0.222671	0.0425856	0.317585
	1 | CG WB123	1	5	0.871	0.709	1.58	0.127757	0	0.412499	0.0851712	0.222671	0.0425856	0.317585
	1 | BP/1/3924	1	5	0.072	0.511	0.583	0.127757	0	0.412499	0.0851712	0.222671	0.0425856	0.317585
	1 | BP/1/816	1	5	0.194	0.517	0.711	0.127757	0	0.412499	0.0851712	0.222671	0.0425856	0.317585
	1 | NMQR1702	1	5	0.378	1.021	1.399	0.127757	0	0.412499	0.0851712	0.222671	0.0425856	0.317585
	1 | SAM-PK-11112	1	5	0.502	0.84	1.342	0.127757	0	0.412499	0.0851712	0.222671	0.0425856	0.317585
	1 | BP/1/155	1	5	0.278	0.625	0.903	0.127757	0	0.412499	0.0851712	0.222671	0.0425856	0.317585
	1 | BP/1/216	1	5	0.207	0.566	0.773	0.127757	0	0.412499	0.0851712	0.222671	0.0425856	0.317585
	1 | SAM-PK-K 8797	1	5	0.07	0.403	0.473	0.127757	0	0.412499	0.0851712	0.222671	0.0425856	0.317585
	1 | SAM-PK-10160	1	5	0.147	0.453	0.6	0.127757	0	0.412499	0.0851712	0.222671	0.0425856	0.317585
	1 | NHMUK 5696	1	5	0.349	0.503	0.852	0.127757	0	0.412499	0.0851712	0.222671	0.0425856	0.317585
	1 | BP/1/4009	1	5	0.291	0.801	1.092	0.127757	0	0.412499	0.0851712	0.222671	0.0425856	0.317585
	1 | BP/1/3849	1	5	0.28	0.552	0.832	0.127757	0	0.412499	0.0851712	0.222671	0.0425856	0.317585
	1 | BP/1/1563	1	5	0.179	0.572	0.751	0.127757	0	0.412499	0.0851712	0.222671	0.0425856	0.317585
	1 | BP/1/3926	1	5	0.4	0.447	0.847	0.127757	0	0.412499	0.0851712	0.222671	0.0425856	0.317585
	1 | BP/1/4263	1	5	0.391	0.234	0.625	0.127757	0	0.412499	0.0851712	0.222671	0.0425856	0.317585
	1 | BP/1/7199	1	5	0.105	0.154	0.259	0.127757	0	0.412499	0.0851712	0.222671	0.0425856	0.317585
	1 | NMQR860	1	5	0.228	0.635	0.863	0.127757	0	0.412499	0.0851712	0.222671	0.0425856	0.317585
	1 | AM 461	1	5	0.175	0.382	0.557	0.127757	0	0.412499	0.0851712	0.222671	0.0425856	0.317585
	1 | BP/1/4658	1	5	0.138	0.445	0.583	0.127757	0	0.412499	0.0851712	0.222671	0.0425856	0.317585
	1 | BP/1/4534	1	5	0.216	0.274	0.49	0.127757	0	0.412499	0.0851712	0.222671	0.0425856	0.317585
	1 | BP/1/2669	1	5	0.308	0.39	0.698	0.127757	0	0.412499	0.0851712	0.222671	0.0425856	0.317585
	1 | MS86	1	5	0.106	0.318	0.424	0.127757	0	0.412499	0.0851712	0.222671	0.0425856	0.317585
	1 | BP/4/908	1	5	0.038	0.216	0.254	0.127757	0	0.412499	0.0851712	0.222671	0.0425856	0.317585
	1 | BP/1/4983	1	5	0.158	0.129	0.287	0.127757	0	0.412499	0.0851712	0.222671	0.0425856	0.317585
	1 | BP/1/4245	1	5	0.108	0.374	0.482	0.127757	0	0.412499	0.0851712	0.222671	0.0425856	0.317585
	1 | NHCC LB18	1	5	0.1	0.393	0.493	0.127757	0	0.412499	0.0851712	0.222671	0.0425856	0.317585
	1 | TMMM-150	1	5	0.043	0.206	0.249	0.127757	0	0.412499	0.0851712	0.222671	0.0425856	0.317585
	1 | TMM-M-7283	1	5	0.026	0.096	0.122	0.127757	0	0.412499	0.0851712	0.222671	0.0425856	0.317585
	1 | AMNH82372	1	5	0.799	0.108	0.907	0.127757	0	0.412499	0.0851712	0.222671	0.0425856	0.317585
	1 | AMNH187859	1	5	0.101	0.251	0.352	0.127757	0	0.412499	0.0851712	0.222671	0.0425856	0.317585
	1 | TMM-M-1885	1	5	0.074	0.244	0.318	0.127757	0	0.412499	0.0851712	0.222671	0.0425856	0.317585
	1 | TMM-M-2517	1	5	0.051	0.208	0.259	0.127757	0	0.412499	0.0851712	0.222671	0.0425856	0.317585
	1 | TMM-M-171	1	5	0.088	0.372	0.46	0.127757	0	0.412499	0.0851712	0.222671	0.0425856	0.317585
	1 | TMM-M-968	1	5	0.087	0.123	0.21	0.127757	0	0.412499	0.0851712	0.222671	0.0425856	0.317585
	1 | AMNH161535	1	5	0.04	0.121	0.161	0.127757	0	0.412499	0.0851712	0.222671	0.0425856	0.317585
	1 | UTO-HS01	1	5	0.415	0.739	1.154	0.127757	0	0.412499	0.0851712	0.222671	0.0425856	0.317585
	1 | TMM-M-7500	1	5	0.011	0.203	0.214	0.127757	0	0.412499	0.0851712	0.222671	0.0425856	0.317585
	1 | TMM-M-5987	1	5	0.15	0.274	0.424	0.127757	0	0.412499	0.0851712	0.222671	0.0425856	0.317585
	1 | AMNH53896	1	5	0.015	0.424	0.439	0.127757	0	0.412499	0.0851712	0.222671	0.0425856	0.317585
	1 | TMM-M-7599	1	5	0.108	0.117	0.225	0.127757	0	0.412499	0.0851712	0.222671	0.0425856	0.317585
	1 | TMM-M-3196	1	5	0.033	0.087	0.12	0.127757	0	0.412499	0.0851712	0.222671	0.0425856	0.317585
	1 | AMNH51909	1	5	0.055	0.43	0.485	0.127757	0	0.412499	0.0851712	0.222671	0.0425856	0.317585
	1 | TMM-M-4351	1	5	0.037	0.196	0.233	0.127757	0	0.412499	0.0851712	0.222671	0.0425856	0.317585
	1 | AMNH237593	1	5	0.055	0.085	0.14	0.127757	0	0.412499	0.0851712	0.222671	0.0425856	0.317585
	1 | AMNH245591	1	5	0.025	0.094	0.119	0.127757	0	0.412499	0.0851712	0.222671	0.0425856	0.317585
	1 | unvouchered	1	5	0.018	0.105	0.123	0.127757	0	0.412499	0.0851712	0.222671	0.0425856	0.317585
	1 | TMM-M-2689	1	5	0.024	0.128	0.152	0.127757	0	0.412499	0.0851712	0.222671	0.0425856	0.317585
	1 | TMM-M-3030	1	5	0.02	0.132	0.152	0.127757	0	0.412499	0.0851712	0.222671	0.0425856	0.317585
	1 | MSW03156	1	5	0.183	0.465	0.648	0.127757	0	0.412499	0.0851712	0.222671	0.0425856	0.317585
	1 | TMM-M-2256	1	5	0.034	0.115	0.149	0.127757	0	0.412499	0.0851712	0.222671	0.0425856	0.317585
	1 | SDNHM21212	1	5	0.038	0.259	0.297	0.127757	0	0.412499	0.0851712	0.222671	0.0425856	0.317585
	1 | IPHEP unvouchered	1	5	0.084	0.389	0.473	0.127757	0	0.412499	0.0851712	0.222671	0.0425856	0.317585
	1 | UCR 3116	1	5	0.308	0.466	0.774	0.127757	0	0.412499	0.0851712	0.222671	0.0425856	0.317585
	1 | RMCA 83,001-M-0014	1	5	0.086	0.153	0.239	0.127757	0	0.412499	0.0851712	0.222671	0.0425856	0.317585
	1 | AMNH M 24289	1	5	0.117	0.242	0.359	0.127757	0	0.412499	0.0851712	0.222671	0.0425856	0.317585
	1 | AMNH M 53672	1	5	0.036	0.385	0.421	0.127757	0	0.412499	0.0851712	0.222671	0.0425856	0.317585
	1 | UM N- 228	1	5	0.033	0.43	0.463	0.127757	0	0.412499	0.0851712	0.222671	0.0425856	0.317585
	1 | AMNH unvouchered	1	5	0.093	0.345	0.438	0.127757	0	0.412499	0.0851712	0.222671	0.0425856	0.317585
	1 | UM N-671	1	5	0.14	0.313	0.453	0.127757	0	0.412499	0.0851712	0.222671	0.0425856	0.317585
	1 | AMNH M 2238	1	5	0.057	0.401	0.458	0.127757	0	0.412499	0.0851712	0.222671	0.0425856	0.317585
	1 | UM2 N-177	1	5	0.325	1.094	1.419	0.127757	0	0.412499	0.0851712	0.222671	0.0425856	0.317585
	1 | UM PDS 3360	1	5	0.092	0.309	0.401	0.127757	0	0.412499	0.0851712	0.222671	0.0425856	0.317585
	1 | UM ITD 1080	1	5	0.162	0.267	0.429	0.127757	0	0.412499	0.0851712	0.222671	0.0425856	0.317585
	1 | MNHN Qu1	1	5	0.242	0.387	0.629	0.127757	0	0.412499	0.0851712	0.222671	0.0425856	0.317585
	1 | UM N-170	1	5	0.056	0.416	0.472	0.127757	0	0.412499	0.0851712	0.222671	0.0425856	0.317585
	1 | UM 58V	1	5	0.067	0.207	0.274	0.127757	0	0.412499	0.0851712	0.222671	0.0425856	0.317585
	1 | UM PV 251212	1	5	0.114	0.827	0.941	0.127757	0	0.412499	0.0851712	0.222671	0.0425856	0.317585
	1 | UM N 03	1	5	0.102	0.304	0.406	0.127757	0	0.412499	0.0851712	0.222671	0.0425856	0.317585
	1 | UM N 785V	1	5	0.261	0.39	0.651	0.127757	0	0.412499	0.0851712	0.222671	0.0425856	0.317585
	1 | AMNH 268369	1	5	0.093	0.121	0.214	0.127757	0	0.412499	0.0851712	0.222671	0.0425856	0.317585
	1 | TMM 40882-41	1	5	0.268	0.489	0.757	0.127757	0	0.412499	0.0851712	0.222671	0.0425856	0.317585
	1 | BP/1/3575	1	5	0.287	0.572	0.859	0.127757	0	0.412499	0.0851712	0.222671	0.0425856	0.317585
	1 | NHMUK R37054	1	5	0.303	0.537	0.84	0.127757	0	0.412499	0.0851712	0.222671	0.0425856	0.317585
	1 | NHCC LB 117	1	5	0.171	0.904	1.075	0.127757	0	0.412499	0.0851712	0.222671	0.0425856	0.317585
	1 | NMT RB581	1	5	0.177	0.712	0.889	0.127757	0	0.412499	0.0851712	0.222671	0.0425856	0.317585
	1 | IVPP 8275	1	5	0.05	0.2	0.25	0.127757	0	0.412499	0.0851712	0.222671	0.0425856	0.317585
	1 | IVPP 8685	1	5	0.02	0.13	0.15	0.127757	0	0.412499	0.0851712	0.222671	0.0425856	0.317585
	1 | NHCC LB44	1	5	0.011	0.4	0.411	0.127757	0	0.412499	0.0851712	0.222671	0.0425856	0.317585
	1 | FMNH 218598	1	5	0.041	0.519	0.56	0.127757	0	0.412499	0.0851712	0.222671	0.0425856	0.317585
	1 | FMNH 10694	1	5	0.146	0.55	0.696	0.127757	0	0.412499	0.0851712	0.222671	0.0425856	0.317585
	1 | BMNH 2858	1	5	0.098	0.194	0.292	0.127757	0	0.412499	0.0851712	0.222671	0.0425856	0.317585
	1 | BP/1/5088	1	5	0.146	0.415	0.561	0.127757	0	0.412499	0.0851712	0.222671	0.0425856	0.317585
	1 | BP/1/4778	1	5	0.079	0.42	0.499	0.127757	0	0.412499	0.0851712	0.222671	0.0425856	0.317585
	1 | FMNH UR 27	1	5	0.299	0.978	1.277	0.127757	0	0.412499	0.0851712	0.222671	0.0425856	0.317585
	1 | MCZ 3778	1	5	0.13	0.63	0.76	0.127757	0	0.412499	0.0851712	0.222671	0.0425856	0.317585
	1 | UFRGS PV833T	1	5	0.11	0.44	0.55	0.127757	0	0.412499	0.0851712	0.222671	0.0425856	0.317585
	1 | UFRGS PV1043	1	5	0.09	0.24	0.33	0.127757	0	0.412499	0.0851712	0.222671	0.0425856	0.317585
	1 | NHMUK 7090	1	5	0.08	0.28	0.36	0.127757	0	0.412499	0.0851712	0.222671	0.0425856	0.317585
	1 | MG 6807 (Gui Mam 2/81)	1	5	0.02	0.196	0.216	0.127757	0	0.412499	0.0851712	0.222671	0.0425856	0.317585
	Box plots (Specimens):
	Scattergrams (Specimens):

## Sheet: RRX (PSC diam)
	XLSTAT 2018.1.1.62926 - Gage R&R / Quantitative - Start time: 05/05/2021 at 09:11:55
	Y / Measurements: Workbook = Supplementary-data-repeatability-analysis.xlsx / Sheet = Dara / Range = Dara!$E:$E / 925 rows and 1 column
	X / Operators: Workbook = Supplementary-data-repeatability-analysis.xlsx / Sheet = Dara / Range = Dara!$B:$B / 925 rows and 1 column
	Parts: Workbook = Supplementary-data-repeatability-analysis.xlsx / Sheet = Dara / Range = Dara!$A:$A / 925 rows and 1 column
	k Sigma: 6
	Method for sigma (subgroups): R bar
	Method: ANOVA (Crossed)
	Significance level (%): 5
	Variance components:
	Source	Gage R&R	Repeatability	Reproducibility	Between parts
	Contribution	0.0399434	0.0399434	0	0.960057
	Study Variation (SV)	0.199858	0.199858	0	0.979825
	Variance:
	Source	Variance components	Contribution
	Gage R&R	0.0054464	0.0399434
	Repeatability	0.0054464	0.0399434
	Reproducibility	0	0
	Operators	0	0
	Operators * Parts	0	0
	Between parts	0.130907	0.960057
	Total	0.136353	1
	Standard deviation:
	Source	Standard deviation	Study Variation (SV)	Study Variation (SV) %
	Gage R&R	0.0737997	0.442798	0.199858
	Repeatability	0.0737997	0.442798	0.199858
	Reproducibility	0	0	0
	Operators	0	0	0
	Operators * Parts	0	0	0
	Between parts	0.36181	2.17086	0.979825
	Total	0.36926	2.21556	1
	Status indicator:
		Value	Status
	Precision to tolerance ratio (P/T)
	Rho P	0.960057
	Rho M	0.0399434
	Signal to noise ratio (SNR)	6.93332	adequate (>+5)
	Discrimination ratio (DR)	49.0709
	Bias
	Bias %
	Resolution
	Removed variables :
	Variable	Reason
	Operator	Constant
	Specimens*Operator	The variable or the interaction of the corresponding column has no significant effect on the dependent variables.
	Goodness of fit statistics:
	Observations	925
	Sum of weights	925
	DF	740
	R²	0.967877
	Adjusted R²	0.95989
	MSE	0.0054464
	RMSE	0.0737997
	Analysis of variance:
	Source	DF	Sum of squares	Mean squares	F	Pr > F
	Parts	184	121.436	0.659979	121.177	< 0,0001
	Operators	0	0
	Operators * Parts
	Repeatability	740	4.03034	0.0054464
	Total	924	125.467
	X-bar chart (control limits):
		1
	UCL	0.604453
	CL	0.466023
	LCL	0.327593
	X-bar chart (Observation details):
		Phase	Subgroup size	Mean	Minimum	Maximum	CL	LCL	UCL	C Lower bound	C Upper bound	B Lower bound	B Upper bound
	1 | FMNH 201350	1	5	0.418	0.4	0.44	0.466023	0.327593	0.604453	0.41988	0.512166	0.373736	0.558309
	1 | FMNH 250439	1	5	0.156	0.14	0.19	0.466023	0.327593	0.604453	0.41988	0.512166	0.373736	0.558309
	1 | FMNH 165622	1	5	0.328	0.25	0.41	0.466023	0.327593	0.604453	0.41988	0.512166	0.373736	0.558309
	1 | CAS 126478	1	5	0.162	0.13	0.19	0.466023	0.327593	0.604453	0.41988	0.512166	0.373736	0.558309
	1 | FMNH 31182	1	5	0.332	0.3	0.35	0.466023	0.327593	0.604453	0.41988	0.512166	0.373736	0.558309
	1 | FMNH 260015	1	5	0.478	0.44	0.53	0.466023	0.327593	0.604453	0.41988	0.512166	0.373736	0.558309
	1 | UMMZ 190285	1	5	0.368	0.32	0.39	0.466023	0.327593	0.604453	0.41988	0.512166	0.373736	0.558309
	1 | FMNH 47572	1	5	0.442	0.39	0.5	0.466023	0.327593	0.604453	0.41988	0.512166	0.373736	0.558309
	1 | FMNH 71626	1	5	0.33	0.31	0.36	0.466023	0.327593	0.604453	0.41988	0.512166	0.373736	0.558309
	1 | YPM 12670	1	5	0.202	0.17	0.28	0.466023	0.327593	0.604453	0.41988	0.512166	0.373736	0.558309
	1 | FMNH 60958	1	5	0.232	0.21	0.27	0.466023	0.327593	0.604453	0.41988	0.512166	0.373736	0.558309
	1 | USNM 128679	1	5	0.132	0.11	0.15	0.466023	0.327593	0.604453	0.41988	0.512166	0.373736	0.558309
	1 | FMNH 221322	1	5	0.29	0.25	0.32	0.466023	0.327593	0.604453	0.41988	0.512166	0.373736	0.558309
	1 | CMNH 67524	1	5	0.278	0.26	0.3	0.466023	0.327593	0.604453	0.41988	0.512166	0.373736	0.558309
	1 | FMNH 120968	1	5	0.168	0.16	0.18	0.466023	0.327593	0.604453	0.41988	0.512166	0.373736	0.558309
	1 | FMNH 186818	1	5	0.258	0.24	0.28	0.466023	0.327593	0.604453	0.41988	0.512166	0.373736	0.558309
	1 | TNHC 64380	1	5	0.57	0.48	0.63	0.466023	0.327593	0.604453	0.41988	0.512166	0.373736	0.558309
	1 | YPM 12858	1	5	0.244	0.22	0.26	0.466023	0.327593	0.604453	0.41988	0.512166	0.373736	0.558309
	1 | FMNH 148589	1	5	0.348	0.31	0.37	0.466023	0.327593	0.604453	0.41988	0.512166	0.373736	0.558309
	1 | FMNH 202810	1	5	0.426	0.4	0.44	0.466023	0.327593	0.604453	0.41988	0.512166	0.373736	0.558309
	1 | USNM 260564	1	5	0.17	0.16	0.19	0.466023	0.327593	0.604453	0.41988	0.512166	0.373736	0.558309
	1 | LACM 136359	1	5	0.162	0.13	0.21	0.466023	0.327593	0.604453	0.41988	0.512166	0.373736	0.558309
	1 | MVZ 125659	1	5	0.154	0.13	0.18	0.466023	0.327593	0.604453	0.41988	0.512166	0.373736	0.558309
	1 | USNM 200767	1	5	0.312	0.28	0.33	0.466023	0.327593	0.604453	0.41988	0.512166	0.373736	0.558309
	1 | YPM 12870	1	5	0.36	0.32	0.41	0.466023	0.327593	0.604453	0.41988	0.512166	0.373736	0.558309
	1 | FMNH 122866	1	5	0.242	0.23	0.26	0.466023	0.327593	0.604453	0.41988	0.512166	0.373736	0.558309
	1 | YPM 9194	1	5	0.342	0.3	0.4	0.466023	0.327593	0.604453	0.41988	0.512166	0.373736	0.558309
	1 | CAS 171013	1	5	0.264	0.25	0.28	0.466023	0.327593	0.604453	0.41988	0.512166	0.373736	0.558309
	1 | TNHC 64040	1	5	0.35	0.32	0.39	0.466023	0.327593	0.604453	0.41988	0.512166	0.373736	0.558309
	1 | FMNH 22416	1	5	0.332	0.29	0.37	0.466023	0.327593	0.604453	0.41988	0.512166	0.373736	0.558309
	1 | USNM 12378	1	5	0.212	0.19	0.22	0.466023	0.327593	0.604453	0.41988	0.512166	0.373736	0.558309
	1 | FMNH 78661	1	5	0.462	0.38	0.55	0.466023	0.327593	0.604453	0.41988	0.512166	0.373736	0.558309
	1 | FMNH 167048	1	5	0.132	0.12	0.15	0.466023	0.327593	0.604453	0.41988	0.512166	0.373736	0.558309
	1 | FMNH 35144	1	5	0.894	0.85	0.92	0.466023	0.327593	0.604453	0.41988	0.512166	0.373736	0.558309
	1 | FMNH 158613	1	5	0.232	0.22	0.24	0.466023	0.327593	0.604453	0.41988	0.512166	0.373736	0.558309
	1 | FMNH 148900	1	5	0.188	0.16	0.22	0.466023	0.327593	0.604453	0.41988	0.512166	0.373736	0.558309
	1 | 1930.5.8.725	1	5	0.4796	0.404	0.57	0.466023	0.327593	0.604453	0.41988	0.512166	0.373736	0.558309
	1 | Brochu 1999 monograph	1	5	1.409	1.2	1.8	0.466023	0.327593	0.604453	0.41988	0.512166	0.373736	0.558309
	1 | 1964.1782	1	5	0.3754	0.298	0.406	0.466023	0.327593	0.604453	0.41988	0.512166	0.373736	0.558309
	1 | 1964.179	1	5	0.2196	0.2	0.249	0.466023	0.327593	0.604453	0.41988	0.512166	0.373736	0.558309
	1 | FRIM0026; Digimorph	1	5	0.2032	0.195	0.213	0.466023	0.327593	0.604453	0.41988	0.512166	0.373736	0.558309
	1 | S/1972.1.21	1	5	0.7216	0.637	0.796	0.466023	0.327593	0.604453	0.41988	0.512166	0.373736	0.558309
	1 | S/1987.27.1	1	5	0.48	0.438	0.562	0.466023	0.327593	0.604453	0.41988	0.512166	0.373736	0.558309
	1 | S/2007.139.12	1	5	1.121	1.046	1.228	0.466023	0.327593	0.604453	0.41988	0.512166	0.373736	0.558309
	1 | FMNH 73711; Digimorph	1	5	0.7884	0.663	0.878	0.466023	0.327593	0.604453	0.41988	0.512166	0.373736	0.558309
	1 | 1939.12.9.964	1	5	0.9794	0.885	1.107	0.466023	0.327593	0.604453	0.41988	0.512166	0.373736	0.558309
	1 | 1930.5.8.952	1	5	0.4546	0.428	0.486	0.466023	0.327593	0.604453	0.41988	0.512166	0.373736	0.558309
	1 | YPM 12690; Digimorph	1	5	0.183	0.154	0.204	0.466023	0.327593	0.604453	0.41988	0.512166	0.373736	0.558309
	1 | 1969.2864	1	5	3.2962	2.978	3.546	0.466023	0.327593	0.604453	0.41988	0.512166	0.373736	0.558309
	1 | UF22159; Digimorph	1	5	1.0272	0.944	1.143	0.466023	0.327593	0.604453	0.41988	0.512166	0.373736	0.558309
	1 | 1859.9.6.393	1	5	0.813	0.773	0.846	0.466023	0.327593	0.604453	0.41988	0.512166	0.373736	0.558309
	1 | S/1952.1.103	1	5	0.7932	0.721	0.854	0.466023	0.327593	0.604453	0.41988	0.512166	0.373736	0.558309
	1 | S/1979.66.160	1	5	0.6562	0.617	0.698	0.466023	0.327593	0.604453	0.41988	0.512166	0.373736	0.558309
	1 | USNM 547842; Digimorph	1	5	0.1594	0.149	0.172	0.466023	0.327593	0.604453	0.41988	0.512166	0.373736	0.558309
	1 | FMNH 75662	1	5	0.1174	0.107	0.135	0.466023	0.327593	0.604453	0.41988	0.512166	0.373736	0.558309
	1 | FMNH59071	1	5	1.5742	1.2	1.965	0.466023	0.327593	0.604453	0.41988	0.512166	0.373736	0.558309
	1 | OUVC 10425	1	5	0.5338	0.32	0.877	0.466023	0.327593	0.604453	0.41988	0.512166	0.373736	0.558309
	1 | TMM M-4980	1	5	0.9666	0.892	1.036	0.466023	0.327593	0.604453	0.41988	0.512166	0.373736	0.558309
	1 | S/1995.11.1	1	5	0.8918	0.818	0.943	0.466023	0.327593	0.604453	0.41988	0.512166	0.373736	0.558309
	1 | S/1969.1.163	1	5	0.4062	0.391	0.438	0.466023	0.327593	0.604453	0.41988	0.512166	0.373736	0.558309
	1 | FMNH 64429; Digimorph	1	5	0.1398	0.129	0.156	0.466023	0.327593	0.604453	0.41988	0.512166	0.373736	0.558309
	1 | S/2001.50.1	1	5	0.8494	0.721	0.996	0.466023	0.327593	0.604453	0.41988	0.512166	0.373736	0.558309
	1 | YPM 12668; Digimorph	1	5	0.3176	0.258	0.371	0.466023	0.327593	0.604453	0.41988	0.512166	0.373736	0.558309
	1 | 1792.568	1	5	0.3668	0.312	0.406	0.466023	0.327593	0.604453	0.41988	0.512166	0.373736	0.558309
	1 | TMM M-5490; Digimorph	1	5	0.6106	0.543	0.707	0.466023	0.327593	0.604453	0.41988	0.512166	0.373736	0.558309
	1 | 1983.65	1	5	0.3674	0.345	0.408	0.466023	0.327593	0.604453	0.41988	0.512166	0.373736	0.558309
	1 | 1964.1829	1	5	0.3192	0.263	0.364	0.466023	0.327593	0.604453	0.41988	0.512166	0.373736	0.558309
	1 | YPM 14379; Digimorph	1	5	0.3936	0.318	0.433	0.466023	0.327593	0.604453	0.41988	0.512166	0.373736	0.558309
	1 | 1978.346	1	5	0.1916	0.174	0.226	0.466023	0.327593	0.604453	0.41988	0.512166	0.373736	0.558309
	1 | TNHC 62766; Digimorph	1	5	0.4436	0.404	0.485	0.466023	0.327593	0.604453	0.41988	0.512166	0.373736	0.558309
	1 | YPM 14381; Digimorph	1	5	0.379	0.34	0.411	0.466023	0.327593	0.604453	0.41988	0.512166	0.373736	0.558309
	1 | YPM 6057; Digimorph	1	5	0.309	0.296	0.332	0.466023	0.327593	0.604453	0.41988	0.512166	0.373736	0.558309
	1 | 1970.1.20.135	1	5	0.3334	0.295	0.362	0.466023	0.327593	0.604453	0.41988	0.512166	0.373736	0.558309
	1 | S/1968.4.14	1	5	0.3484	0.323	0.373	0.466023	0.327593	0.604453	0.41988	0.512166	0.373736	0.558309
	1 | S/1966.51.59	1	5	0.2652	0.238	0.283	0.466023	0.327593	0.604453	0.41988	0.512166	0.373736	0.558309
	1 | 59.9.21.2	1	5	0.4306	0.384	0.492	0.466023	0.327593	0.604453	0.41988	0.512166	0.373736	0.558309
	1 | YPM 12868; Digimorph	1	5	0.3678	0.342	0.386	0.466023	0.327593	0.604453	0.41988	0.512166	0.373736	0.558309
	1 | 1978.1441	1	5	0.2266	0.206	0.275	0.466023	0.327593	0.604453	0.41988	0.512166	0.373736	0.558309
	1 | S/1973.66.109	1	5	0.5	0.489	0.518	0.466023	0.327593	0.604453	0.41988	0.512166	0.373736	0.558309
	1 | 1900.9.22.15	1	5	0.2494	0.227	0.266	0.466023	0.327593	0.604453	0.41988	0.512166	0.373736	0.558309
	1 | TNHC 62769; Digimorph	1	5	0.6496	0.599	0.694	0.466023	0.327593	0.604453	0.41988	0.512166	0.373736	0.558309
	1 | NHM Unregistered Palaeontology Comparative Collection (6)9	1	5	0.2986	0.288	0.306	0.466023	0.327593	0.604453	0.41988	0.512166	0.373736	0.558309
	1 | S/1986.75.13	1	5	0.659	0.595	0.715	0.466023	0.327593	0.604453	0.41988	0.512166	0.373736	0.558309
	1 | LDUCZ x036	1	5	0.2954	0.241	0.387	0.466023	0.327593	0.604453	0.41988	0.512166	0.373736	0.558309
	1 | UF 21341	1	5	0.77504	0.7025	0.9444	0.466023	0.327593	0.604453	0.41988	0.512166	0.373736	0.558309
	1 | 1927.2.5.1	1	5	0.946	0.897	1.008	0.466023	0.327593	0.604453	0.41988	0.512166	0.373736	0.558309
	1 | S/2002.46.1	1	5	0.2418	0.227	0.27	0.466023	0.327593	0.604453	0.41988	0.512166	0.373736	0.558309
	1 | 29a	1	5	0.5604	0.539	0.579	0.466023	0.327593	0.604453	0.41988	0.512166	0.373736	0.558309
	1 | USNM211322	1	5	0.203	0.181	0.253	0.466023	0.327593	0.604453	0.41988	0.512166	0.373736	0.558309
	1 | 1938.5.7.59	1	5	0.356	0.317	0.399	0.466023	0.327593	0.604453	0.41988	0.512166	0.373736	0.558309
	1 | S/1981.39.1	1	5	0.5532	0.489	0.589	0.466023	0.327593	0.604453	0.41988	0.512166	0.373736	0.558309
	1 | UCA.5; Digimorph	1	5	0.5484	0.386	0.715	0.466023	0.327593	0.604453	0.41988	0.512166	0.373736	0.558309
	1 | 1932.6.1.12	1	5	0.5448	0.487	0.594	0.466023	0.327593	0.604453	0.41988	0.512166	0.373736	0.558309
	1 | 97.5.31.1	1	5	0.6132	0.438	0.881	0.466023	0.327593	0.604453	0.41988	0.512166	0.373736	0.558309
	1 | UCMZ R.9586	1	5	0.7956	0.778	0.808	0.466023	0.327593	0.604453	0.41988	0.512166	0.373736	0.558309
	1 | AM 6556	1	5	1.678	1.186	2.109	0.466023	0.327593	0.604453	0.41988	0.512166	0.373736	0.558309
	1 | CG WB123	1	5	0.8596	0.833	0.894	0.466023	0.327593	0.604453	0.41988	0.512166	0.373736	0.558309
	1 | BP/1/3924	1	5	0.3426	0.288	0.389	0.466023	0.327593	0.604453	0.41988	0.512166	0.373736	0.558309
	1 | BP/1/816	1	5	0.6418	0.468	0.75	0.466023	0.327593	0.604453	0.41988	0.512166	0.373736	0.558309
	1 | NMQR1702	1	5	0.862	0.817	0.894	0.466023	0.327593	0.604453	0.41988	0.512166	0.373736	0.558309
	1 | SAM-PK-11112	1	5	1.2012	0.732	1.415	0.466023	0.327593	0.604453	0.41988	0.512166	0.373736	0.558309
	1 | BP/1/155	1	5	0.6668	0.594	0.739	0.466023	0.327593	0.604453	0.41988	0.512166	0.373736	0.558309
	1 | BP/1/216	1	5	0.6198	0.557	0.761	0.466023	0.327593	0.604453	0.41988	0.512166	0.373736	0.558309
	1 | SAM-PK-K 8797	1	5	0.4032	0.387	0.414	0.466023	0.327593	0.604453	0.41988	0.512166	0.373736	0.558309
	1 | SAM-PK-10160	1	5	0.434	0.393	0.458	0.466023	0.327593	0.604453	0.41988	0.512166	0.373736	0.558309
	1 | NHMUK 5696	1	5	0.4334	0.369	0.518	0.466023	0.327593	0.604453	0.41988	0.512166	0.373736	0.558309
	1 | BP/1/4009	1	5	0.8722	0.814	0.996	0.466023	0.327593	0.604453	0.41988	0.512166	0.373736	0.558309
	1 | BP/1/3849	1	5	0.8136	0.55	0.925	0.466023	0.327593	0.604453	0.41988	0.512166	0.373736	0.558309
	1 | BP/1/1563	1	5	0.6332	0.539	0.681	0.466023	0.327593	0.604453	0.41988	0.512166	0.373736	0.558309
	1 | BP/1/3926	1	5	0.6748	0.334	0.986	0.466023	0.327593	0.604453	0.41988	0.512166	0.373736	0.558309
	1 | BP/1/4263	1	5	0.4198	0.344	0.604	0.466023	0.327593	0.604453	0.41988	0.512166	0.373736	0.558309
	1 | BP/1/7199	1	5	0.2116	0.169	0.295	0.466023	0.327593	0.604453	0.41988	0.512166	0.373736	0.558309
	1 | NMQR860	1	5	0.8022	0.784	0.833	0.466023	0.327593	0.604453	0.41988	0.512166	0.373736	0.558309
	1 | AM 461	1	5	0.4312	0.407	0.453	0.466023	0.327593	0.604453	0.41988	0.512166	0.373736	0.558309
	1 | BP/1/4658	1	5	0.4258	0.356	0.48	0.466023	0.327593	0.604453	0.41988	0.512166	0.373736	0.558309
	1 | BP/1/4534	1	5	0.4046	0.353	0.454	0.466023	0.327593	0.604453	0.41988	0.512166	0.373736	0.558309
	1 | BP/1/2669	1	5	0.33	0.261	0.382	0.466023	0.327593	0.604453	0.41988	0.512166	0.373736	0.558309
	1 | MS86	1	5	0.3842	0.308	0.455	0.466023	0.327593	0.604453	0.41988	0.512166	0.373736	0.558309
	1 | BP/4/908	1	5	0.273	0.241	0.309	0.466023	0.327593	0.604453	0.41988	0.512166	0.373736	0.558309
	1 | BP/1/4983	1	5	0.1546	0.123	0.172	0.466023	0.327593	0.604453	0.41988	0.512166	0.373736	0.558309
	1 | BP/1/4245	1	5	0.1976	0.11	0.275	0.466023	0.327593	0.604453	0.41988	0.512166	0.373736	0.558309
	1 | NHCC LB18	1	5	0.487	0.395	0.562	0.466023	0.327593	0.604453	0.41988	0.512166	0.373736	0.558309
	1 | TMMM-150	1	5	0.2018	0.175	0.22	0.466023	0.327593	0.604453	0.41988	0.512166	0.373736	0.558309
	1 | TMM-M-7283	1	5	0.1098	0.1	0.121	0.466023	0.327593	0.604453	0.41988	0.512166	0.373736	0.558309
	1 | AMNH82372	1	5	0.1142	0.105	0.121	0.466023	0.327593	0.604453	0.41988	0.512166	0.373736	0.558309
	1 | AMNH187859	1	5	0.3368	0.312	0.36	0.466023	0.327593	0.604453	0.41988	0.512166	0.373736	0.558309
	1 | TMM-M-1885	1	5	0.2404	0.233	0.252	0.466023	0.327593	0.604453	0.41988	0.512166	0.373736	0.558309
	1 | TMM-M-2517	1	5	0.189	0.172	0.219	0.466023	0.327593	0.604453	0.41988	0.512166	0.373736	0.558309
	1 | TMM-M-171	1	5	0.3836	0.359	0.419	0.466023	0.327593	0.604453	0.41988	0.512166	0.373736	0.558309
	1 | TMM-M-968	1	5	0.1904	0.162	0.22	0.466023	0.327593	0.604453	0.41988	0.512166	0.373736	0.558309
	1 | AMNH161535	1	5	0.141	0.126	0.156	0.466023	0.327593	0.604453	0.41988	0.512166	0.373736	0.558309
	1 | UTO-HS01	1	5	0.8292	0.63	1.073	0.466023	0.327593	0.604453	0.41988	0.512166	0.373736	0.558309
	1 | TMM-M-7500	1	5	0.2244	0.211	0.267	0.466023	0.327593	0.604453	0.41988	0.512166	0.373736	0.558309
	1 | TMM-M-5987	1	5	0.3148	0.257	0.363	0.466023	0.327593	0.604453	0.41988	0.512166	0.373736	0.558309
	1 | AMNH53896	1	5	0.4202	0.399	0.444	0.466023	0.327593	0.604453	0.41988	0.512166	0.373736	0.558309
	1 | TMM-M-7599	1	5	0.1342	0.103	0.146	0.466023	0.327593	0.604453	0.41988	0.512166	0.373736	0.558309
	1 | TMM-M-3196	1	5	0.0826	0.068	0.094	0.466023	0.327593	0.604453	0.41988	0.512166	0.373736	0.558309
	1 | AMNH51909	1	5	0.4704	0.395	0.528	0.466023	0.327593	0.604453	0.41988	0.512166	0.373736	0.558309
	1 | TMM-M-4351	1	5	0.2164	0.206	0.251	0.466023	0.327593	0.604453	0.41988	0.512166	0.373736	0.558309
	1 | AMNH237593	1	5	0.12	0.111	0.126	0.466023	0.327593	0.604453	0.41988	0.512166	0.373736	0.558309
	1 | AMNH245591	1	5	0.099	0.086	0.124	0.466023	0.327593	0.604453	0.41988	0.512166	0.373736	0.558309
	1 | unvouchered	1	5	0.1082	0.097	0.119	0.466023	0.327593	0.604453	0.41988	0.512166	0.373736	0.558309
	1 | TMM-M-2689	1	5	0.1568	0.145	0.168	0.466023	0.327593	0.604453	0.41988	0.512166	0.373736	0.558309
	1 | TMM-M-3030	1	5	0.1424	0.133	0.156	0.466023	0.327593	0.604453	0.41988	0.512166	0.373736	0.558309
	1 | MSW03156	1	5	0.5026	0.416	0.575	0.466023	0.327593	0.604453	0.41988	0.512166	0.373736	0.558309
	1 | TMM-M-2256	1	5	0.1366	0.128	0.151	0.466023	0.327593	0.604453	0.41988	0.512166	0.373736	0.558309
	1 | SDNHM21212	1	5	0.277	0.268	0.291	0.466023	0.327593	0.604453	0.41988	0.512166	0.373736	0.558309
	1 | IPHEP unvouchered	1	5	0.3522	0.291	0.429	0.466023	0.327593	0.604453	0.41988	0.512166	0.373736	0.558309
	1 | UCR 3116	1	5	0.5026	0.415	0.717	0.466023	0.327593	0.604453	0.41988	0.512166	0.373736	0.558309
	1 | RMCA 83,001-M-0014	1	5	0.2226	0.169	0.267	0.466023	0.327593	0.604453	0.41988	0.512166	0.373736	0.558309
	1 | AMNH M 24289	1	5	0.2758	0.242	0.31	0.466023	0.327593	0.604453	0.41988	0.512166	0.373736	0.558309
	1 | AMNH M 53672	1	5	0.405	0.389	0.443	0.466023	0.327593	0.604453	0.41988	0.512166	0.373736	0.558309
	1 | UM N- 228	1	5	0.4162	0.394	0.437	0.466023	0.327593	0.604453	0.41988	0.512166	0.373736	0.558309
	1 | AMNH unvouchered	1	5	0.2524	0.212	0.299	0.466023	0.327593	0.604453	0.41988	0.512166	0.373736	0.558309
	1 | UM N-671	1	5	0.4002	0.202	0.48	0.466023	0.327593	0.604453	0.41988	0.512166	0.373736	0.558309
	1 | AMNH M 2238	1	5	0.387	0.345	0.464	0.466023	0.327593	0.604453	0.41988	0.512166	0.373736	0.558309
	1 | UM2 N-177	1	5	1.2154	1.033	1.409	0.466023	0.327593	0.604453	0.41988	0.512166	0.373736	0.558309
	1 | UM PDS 3360	1	5	0.3092	0.305	0.312	0.466023	0.327593	0.604453	0.41988	0.512166	0.373736	0.558309
	1 | UM ITD 1080	1	5	0.2966	0.258	0.318	0.466023	0.327593	0.604453	0.41988	0.512166	0.373736	0.558309
	1 | MNHN Qu1	1	5	0.5412	0.473	0.591	0.466023	0.327593	0.604453	0.41988	0.512166	0.373736	0.558309
	1 | UM N-170	1	5	0.529	0.496	0.578	0.466023	0.327593	0.604453	0.41988	0.512166	0.373736	0.558309
	1 | UM 58V	1	5	0.2328	0.19	0.265	0.466023	0.327593	0.604453	0.41988	0.512166	0.373736	0.558309
	1 | UM PV 251212	1	5	0.9242	0.792	0.974	0.466023	0.327593	0.604453	0.41988	0.512166	0.373736	0.558309
	1 | UM N 03	1	5	0.3266	0.314	0.338	0.466023	0.327593	0.604453	0.41988	0.512166	0.373736	0.558309
	1 | UM N 785V	1	5	0.6098	0.48	0.69	0.466023	0.327593	0.604453	0.41988	0.512166	0.373736	0.558309
	1 | AMNH 268369	1	5	0.1134	0.067	0.152	0.466023	0.327593	0.604453	0.41988	0.512166	0.373736	0.558309
	1 | TMM 40882-41	1	5	0.648	0.609	0.679	0.466023	0.327593	0.604453	0.41988	0.512166	0.373736	0.558309
	1 | BP/1/3575	1	5	0.72	0.582	0.833	0.466023	0.327593	0.604453	0.41988	0.512166	0.373736	0.558309
	1 | NHMUK R37054	1	5	0.7284	0.674	0.762	0.466023	0.327593	0.604453	0.41988	0.512166	0.373736	0.558309
	1 | NHCC LB 117	1	5	1.2022	1.124	1.331	0.466023	0.327593	0.604453	0.41988	0.512166	0.373736	0.558309
	1 | NMT RB581	1	5	0.8394	0.769	0.869	0.466023	0.327593	0.604453	0.41988	0.512166	0.373736	0.558309
	1 | IVPP 8275	1	5	0.26	0.24	0.29	0.466023	0.327593	0.604453	0.41988	0.512166	0.373736	0.558309
	1 | IVPP 8685	1	5	0.156	0.14	0.17	0.466023	0.327593	0.604453	0.41988	0.512166	0.373736	0.558309
	1 | NHCC LB44	1	5	0.3786	0.334	0.445	0.466023	0.327593	0.604453	0.41988	0.512166	0.373736	0.558309
	1 | FMNH 218598	1	5	0.5428	0.463	0.628	0.466023	0.327593	0.604453	0.41988	0.512166	0.373736	0.558309
	1 | FMNH 10694	1	5	0.5266	0.488	0.58	0.466023	0.327593	0.604453	0.41988	0.512166	0.373736	0.558309
	1 | BMNH 2858	1	5	0.2558	0.228	0.274	0.466023	0.327593	0.604453	0.41988	0.512166	0.373736	0.558309
	1 | BP/1/5088	1	5	0.5552	0.497	0.591	0.466023	0.327593	0.604453	0.41988	0.512166	0.373736	0.558309
	1 | BP/1/4778	1	5	0.4532	0.384	0.523	0.466023	0.327593	0.604453	0.41988	0.512166	0.373736	0.558309
	1 | FMNH UR 27	1	5	0.9522	0.894	1.038	0.466023	0.327593	0.604453	0.41988	0.512166	0.373736	0.558309
	1 | MCZ 3778	1	5	1.458	1.4	1.55	0.466023	0.327593	0.604453	0.41988	0.512166	0.373736	0.558309
	1 | UFRGS PV833T	1	5	0.518	0.43	0.6	0.466023	0.327593	0.604453	0.41988	0.512166	0.373736	0.558309
	1 | UFRGS PV1043	1	5	0.326	0.29	0.35	0.466023	0.327593	0.604453	0.41988	0.512166	0.373736	0.558309
	1 | NHMUK 7090	1	5	0.334	0.3	0.37	0.466023	0.327593	0.604453	0.41988	0.512166	0.373736	0.558309
	1 | MG 6807 (Gui Mam 2/81)	1	5	0.179	0.156	0.199	0.466023	0.327593	0.604453	0.41988	0.512166	0.373736	0.558309
	R chart (control limits):
		1
	UCL	0.387435
	CL	0.119994
	LCL	0
	R chart (Observation details):
		Phase	Subgroup size	Mean	Minimum	Maximum	CL	LCL	UCL	C Lower bound	C Upper bound	B Lower bound	B Upper bound
	1 | FMNH 201350	1	5	0.04	0.4	0.44	0.119994	0	0.387435	0.079996	0.209141	0.039998	0.298288
	1 | FMNH 250439	1	5	0.05	0.14	0.19	0.119994	0	0.387435	0.079996	0.209141	0.039998	0.298288
	1 | FMNH 165622	1	5	0.16	0.25	0.41	0.119994	0	0.387435	0.079996	0.209141	0.039998	0.298288
	1 | CAS 126478	1	5	0.06	0.13	0.19	0.119994	0	0.387435	0.079996	0.209141	0.039998	0.298288
	1 | FMNH 31182	1	5	0.05	0.3	0.35	0.119994	0	0.387435	0.079996	0.209141	0.039998	0.298288
	1 | FMNH 260015	1	5	0.09	0.44	0.53	0.119994	0	0.387435	0.079996	0.209141	0.039998	0.298288
	1 | UMMZ 190285	1	5	0.07	0.32	0.39	0.119994	0	0.387435	0.079996	0.209141	0.039998	0.298288
	1 | FMNH 47572	1	5	0.11	0.39	0.5	0.119994	0	0.387435	0.079996	0.209141	0.039998	0.298288
	1 | FMNH 71626	1	5	0.05	0.31	0.36	0.119994	0	0.387435	0.079996	0.209141	0.039998	0.298288
	1 | YPM 12670	1	5	0.11	0.17	0.28	0.119994	0	0.387435	0.079996	0.209141	0.039998	0.298288
	1 | FMNH 60958	1	5	0.06	0.21	0.27	0.119994	0	0.387435	0.079996	0.209141	0.039998	0.298288
	1 | USNM 128679	1	5	0.04	0.11	0.15	0.119994	0	0.387435	0.079996	0.209141	0.039998	0.298288
	1 | FMNH 221322	1	5	0.07	0.25	0.32	0.119994	0	0.387435	0.079996	0.209141	0.039998	0.298288
	1 | CMNH 67524	1	5	0.04	0.26	0.3	0.119994	0	0.387435	0.079996	0.209141	0.039998	0.298288
	1 | FMNH 120968	1	5	0.02	0.16	0.18	0.119994	0	0.387435	0.079996	0.209141	0.039998	0.298288
	1 | FMNH 186818	1	5	0.04	0.24	0.28	0.119994	0	0.387435	0.079996	0.209141	0.039998	0.298288
	1 | TNHC 64380	1	5	0.15	0.48	0.63	0.119994	0	0.387435	0.079996	0.209141	0.039998	0.298288
	1 | YPM 12858	1	5	0.04	0.22	0.26	0.119994	0	0.387435	0.079996	0.209141	0.039998	0.298288
	1 | FMNH 148589	1	5	0.06	0.31	0.37	0.119994	0	0.387435	0.079996	0.209141	0.039998	0.298288
	1 | FMNH 202810	1	5	0.04	0.4	0.44	0.119994	0	0.387435	0.079996	0.209141	0.039998	0.298288
	1 | USNM 260564	1	5	0.03	0.16	0.19	0.119994	0	0.387435	0.079996	0.209141	0.039998	0.298288
	1 | LACM 136359	1	5	0.08	0.13	0.21	0.119994	0	0.387435	0.079996	0.209141	0.039998	0.298288
	1 | MVZ 125659	1	5	0.05	0.13	0.18	0.119994	0	0.387435	0.079996	0.209141	0.039998	0.298288
	1 | USNM 200767	1	5	0.05	0.28	0.33	0.119994	0	0.387435	0.079996	0.209141	0.039998	0.298288
	1 | YPM 12870	1	5	0.09	0.32	0.41	0.119994	0	0.387435	0.079996	0.209141	0.039998	0.298288
	1 | FMNH 122866	1	5	0.03	0.23	0.26	0.119994	0	0.387435	0.079996	0.209141	0.039998	0.298288
	1 | YPM 9194	1	5	0.1	0.3	0.4	0.119994	0	0.387435	0.079996	0.209141	0.039998	0.298288
	1 | CAS 171013	1	5	0.03	0.25	0.28	0.119994	0	0.387435	0.079996	0.209141	0.039998	0.298288
	1 | TNHC 64040	1	5	0.07	0.32	0.39	0.119994	0	0.387435	0.079996	0.209141	0.039998	0.298288
	1 | FMNH 22416	1	5	0.08	0.29	0.37	0.119994	0	0.387435	0.079996	0.209141	0.039998	0.298288
	1 | USNM 12378	1	5	0.03	0.19	0.22	0.119994	0	0.387435	0.079996	0.209141	0.039998	0.298288
	1 | FMNH 78661	1	5	0.17	0.38	0.55	0.119994	0	0.387435	0.079996	0.209141	0.039998	0.298288
	1 | FMNH 167048	1	5	0.03	0.12	0.15	0.119994	0	0.387435	0.079996	0.209141	0.039998	0.298288
	1 | FMNH 35144	1	5	0.07	0.85	0.92	0.119994	0	0.387435	0.079996	0.209141	0.039998	0.298288
	1 | FMNH 158613	1	5	0.02	0.22	0.24	0.119994	0	0.387435	0.079996	0.209141	0.039998	0.298288
	1 | FMNH 148900	1	5	0.06	0.16	0.22	0.119994	0	0.387435	0.079996	0.209141	0.039998	0.298288
	1 | 1930.5.8.725	1	5	0.166	0.404	0.57	0.119994	0	0.387435	0.079996	0.209141	0.039998	0.298288
	1 | Brochu 1999 monograph	1	5	0.6	1.2	1.8	0.119994	0	0.387435	0.079996	0.209141	0.039998	0.298288
	1 | 1964.1782	1	5	0.108	0.298	0.406	0.119994	0	0.387435	0.079996	0.209141	0.039998	0.298288
	1 | 1964.179	1	5	0.049	0.2	0.249	0.119994	0	0.387435	0.079996	0.209141	0.039998	0.298288
	1 | FRIM0026; Digimorph	1	5	0.018	0.195	0.213	0.119994	0	0.387435	0.079996	0.209141	0.039998	0.298288
	1 | S/1972.1.21	1	5	0.159	0.637	0.796	0.119994	0	0.387435	0.079996	0.209141	0.039998	0.298288
	1 | S/1987.27.1	1	5	0.124	0.438	0.562	0.119994	0	0.387435	0.079996	0.209141	0.039998	0.298288
	1 | S/2007.139.12	1	5	0.182	1.046	1.228	0.119994	0	0.387435	0.079996	0.209141	0.039998	0.298288
	1 | FMNH 73711; Digimorph	1	5	0.215	0.663	0.878	0.119994	0	0.387435	0.079996	0.209141	0.039998	0.298288
	1 | 1939.12.9.964	1	5	0.222	0.885	1.107	0.119994	0	0.387435	0.079996	0.209141	0.039998	0.298288
	1 | 1930.5.8.952	1	5	0.058	0.428	0.486	0.119994	0	0.387435	0.079996	0.209141	0.039998	0.298288
	1 | YPM 12690; Digimorph	1	5	0.05	0.154	0.204	0.119994	0	0.387435	0.079996	0.209141	0.039998	0.298288
	1 | 1969.2864	1	5	0.568	2.978	3.546	0.119994	0	0.387435	0.079996	0.209141	0.039998	0.298288
	1 | UF22159; Digimorph	1	5	0.199	0.944	1.143	0.119994	0	0.387435	0.079996	0.209141	0.039998	0.298288
	1 | 1859.9.6.393	1	5	0.073	0.773	0.846	0.119994	0	0.387435	0.079996	0.209141	0.039998	0.298288
	1 | S/1952.1.103	1	5	0.133	0.721	0.854	0.119994	0	0.387435	0.079996	0.209141	0.039998	0.298288
	1 | S/1979.66.160	1	5	0.081	0.617	0.698	0.119994	0	0.387435	0.079996	0.209141	0.039998	0.298288
	1 | USNM 547842; Digimorph	1	5	0.023	0.149	0.172	0.119994	0	0.387435	0.079996	0.209141	0.039998	0.298288
	1 | FMNH 75662	1	5	0.028	0.107	0.135	0.119994	0	0.387435	0.079996	0.209141	0.039998	0.298288
	1 | FMNH59071	1	5	0.765	1.2	1.965	0.119994	0	0.387435	0.079996	0.209141	0.039998	0.298288
	1 | OUVC 10425	1	5	0.557	0.32	0.877	0.119994	0	0.387435	0.079996	0.209141	0.039998	0.298288
	1 | TMM M-4980	1	5	0.144	0.892	1.036	0.119994	0	0.387435	0.079996	0.209141	0.039998	0.298288
	1 | S/1995.11.1	1	5	0.125	0.818	0.943	0.119994	0	0.387435	0.079996	0.209141	0.039998	0.298288
	1 | S/1969.1.163	1	5	0.047	0.391	0.438	0.119994	0	0.387435	0.079996	0.209141	0.039998	0.298288
	1 | FMNH 64429; Digimorph	1	5	0.027	0.129	0.156	0.119994	0	0.387435	0.079996	0.209141	0.039998	0.298288
	1 | S/2001.50.1	1	5	0.275	0.721	0.996	0.119994	0	0.387435	0.079996	0.209141	0.039998	0.298288
	1 | YPM 12668; Digimorph	1	5	0.113	0.258	0.371	0.119994	0	0.387435	0.079996	0.209141	0.039998	0.298288
	1 | 1792.568	1	5	0.094	0.312	0.406	0.119994	0	0.387435	0.079996	0.209141	0.039998	0.298288
	1 | TMM M-5490; Digimorph	1	5	0.164	0.543	0.707	0.119994	0	0.387435	0.079996	0.209141	0.039998	0.298288
	1 | 1983.65	1	5	0.063	0.345	0.408	0.119994	0	0.387435	0.079996	0.209141	0.039998	0.298288
	1 | 1964.1829	1	5	0.101	0.263	0.364	0.119994	0	0.387435	0.079996	0.209141	0.039998	0.298288
	1 | YPM 14379; Digimorph	1	5	0.115	0.318	0.433	0.119994	0	0.387435	0.079996	0.209141	0.039998	0.298288
	1 | 1978.346	1	5	0.052	0.174	0.226	0.119994	0	0.387435	0.079996	0.209141	0.039998	0.298288
	1 | TNHC 62766; Digimorph	1	5	0.081	0.404	0.485	0.119994	0	0.387435	0.079996	0.209141	0.039998	0.298288
	1 | YPM 14381; Digimorph	1	5	0.071	0.34	0.411	0.119994	0	0.387435	0.079996	0.209141	0.039998	0.298288
	1 | YPM 6057; Digimorph	1	5	0.036	0.296	0.332	0.119994	0	0.387435	0.079996	0.209141	0.039998	0.298288
	1 | 1970.1.20.135	1	5	0.067	0.295	0.362	0.119994	0	0.387435	0.079996	0.209141	0.039998	0.298288
	1 | S/1968.4.14	1	5	0.05	0.323	0.373	0.119994	0	0.387435	0.079996	0.209141	0.039998	0.298288
	1 | S/1966.51.59	1	5	0.045	0.238	0.283	0.119994	0	0.387435	0.079996	0.209141	0.039998	0.298288
	1 | 59.9.21.2	1	5	0.108	0.384	0.492	0.119994	0	0.387435	0.079996	0.209141	0.039998	0.298288
	1 | YPM 12868; Digimorph	1	5	0.044	0.342	0.386	0.119994	0	0.387435	0.079996	0.209141	0.039998	0.298288
	1 | 1978.1441	1	5	0.069	0.206	0.275	0.119994	0	0.387435	0.079996	0.209141	0.039998	0.298288
	1 | S/1973.66.109	1	5	0.029	0.489	0.518	0.119994	0	0.387435	0.079996	0.209141	0.039998	0.298288
	1 | 1900.9.22.15	1	5	0.039	0.227	0.266	0.119994	0	0.387435	0.079996	0.209141	0.039998	0.298288
	1 | TNHC 62769; Digimorph	1	5	0.095	0.599	0.694	0.119994	0	0.387435	0.079996	0.209141	0.039998	0.298288
	1 | NHM Unregistered Palaeontology Comparative Collection (6)9	1	5	0.018	0.288	0.306	0.119994	0	0.387435	0.079996	0.209141	0.039998	0.298288
	1 | S/1986.75.13	1	5	0.12	0.595	0.715	0.119994	0	0.387435	0.079996	0.209141	0.039998	0.298288
	1 | LDUCZ x036	1	5	0.146	0.241	0.387	0.119994	0	0.387435	0.079996	0.209141	0.039998	0.298288
	1 | UF 21341	1	5	0.2419	0.7025	0.9444	0.119994	0	0.387435	0.079996	0.209141	0.039998	0.298288
	1 | 1927.2.5.1	1	5	0.111	0.897	1.008	0.119994	0	0.387435	0.079996	0.209141	0.039998	0.298288
	1 | S/2002.46.1	1	5	0.043	0.227	0.27	0.119994	0	0.387435	0.079996	0.209141	0.039998	0.298288
	1 | 29a	1	5	0.04	0.539	0.579	0.119994	0	0.387435	0.079996	0.209141	0.039998	0.298288
	1 | USNM211322	1	5	0.072	0.181	0.253	0.119994	0	0.387435	0.079996	0.209141	0.039998	0.298288
	1 | 1938.5.7.59	1	5	0.082	0.317	0.399	0.119994	0	0.387435	0.079996	0.209141	0.039998	0.298288
	1 | S/1981.39.1	1	5	0.1	0.489	0.589	0.119994	0	0.387435	0.079996	0.209141	0.039998	0.298288
	1 | UCA.5; Digimorph	1	5	0.329	0.386	0.715	0.119994	0	0.387435	0.079996	0.209141	0.039998	0.298288
	1 | 1932.6.1.12	1	5	0.107	0.487	0.594	0.119994	0	0.387435	0.079996	0.209141	0.039998	0.298288
	1 | 97.5.31.1	1	5	0.443	0.438	0.881	0.119994	0	0.387435	0.079996	0.209141	0.039998	0.298288
	1 | UCMZ R.9586	1	5	0.03	0.778	0.808	0.119994	0	0.387435	0.079996	0.209141	0.039998	0.298288
	1 | AM 6556	1	5	0.923	1.186	2.109	0.119994	0	0.387435	0.079996	0.209141	0.039998	0.298288
	1 | CG WB123	1	5	0.061	0.833	0.894	0.119994	0	0.387435	0.079996	0.209141	0.039998	0.298288
	1 | BP/1/3924	1	5	0.101	0.288	0.389	0.119994	0	0.387435	0.079996	0.209141	0.039998	0.298288
	1 | BP/1/816	1	5	0.282	0.468	0.75	0.119994	0	0.387435	0.079996	0.209141	0.039998	0.298288
	1 | NMQR1702	1	5	0.077	0.817	0.894	0.119994	0	0.387435	0.079996	0.209141	0.039998	0.298288
	1 | SAM-PK-11112	1	5	0.683	0.732	1.415	0.119994	0	0.387435	0.079996	0.209141	0.039998	0.298288
	1 | BP/1/155	1	5	0.145	0.594	0.739	0.119994	0	0.387435	0.079996	0.209141	0.039998	0.298288
	1 | BP/1/216	1	5	0.204	0.557	0.761	0.119994	0	0.387435	0.079996	0.209141	0.039998	0.298288
	1 | SAM-PK-K 8797	1	5	0.027	0.387	0.414	0.119994	0	0.387435	0.079996	0.209141	0.039998	0.298288
	1 | SAM-PK-10160	1	5	0.065	0.393	0.458	0.119994	0	0.387435	0.079996	0.209141	0.039998	0.298288
	1 | NHMUK 5696	1	5	0.149	0.369	0.518	0.119994	0	0.387435	0.079996	0.209141	0.039998	0.298288
	1 | BP/1/4009	1	5	0.182	0.814	0.996	0.119994	0	0.387435	0.079996	0.209141	0.039998	0.298288
	1 | BP/1/3849	1	5	0.375	0.55	0.925	0.119994	0	0.387435	0.079996	0.209141	0.039998	0.298288
	1 | BP/1/1563	1	5	0.142	0.539	0.681	0.119994	0	0.387435	0.079996	0.209141	0.039998	0.298288
	1 | BP/1/3926	1	5	0.652	0.334	0.986	0.119994	0	0.387435	0.079996	0.209141	0.039998	0.298288
	1 | BP/1/4263	1	5	0.26	0.344	0.604	0.119994	0	0.387435	0.079996	0.209141	0.039998	0.298288
	1 | BP/1/7199	1	5	0.126	0.169	0.295	0.119994	0	0.387435	0.079996	0.209141	0.039998	0.298288
	1 | NMQR860	1	5	0.049	0.784	0.833	0.119994	0	0.387435	0.079996	0.209141	0.039998	0.298288
	1 | AM 461	1	5	0.046	0.407	0.453	0.119994	0	0.387435	0.079996	0.209141	0.039998	0.298288
	1 | BP/1/4658	1	5	0.124	0.356	0.48	0.119994	0	0.387435	0.079996	0.209141	0.039998	0.298288
	1 | BP/1/4534	1	5	0.101	0.353	0.454	0.119994	0	0.387435	0.079996	0.209141	0.039998	0.298288
	1 | BP/1/2669	1	5	0.121	0.261	0.382	0.119994	0	0.387435	0.079996	0.209141	0.039998	0.298288
	1 | MS86	1	5	0.147	0.308	0.455	0.119994	0	0.387435	0.079996	0.209141	0.039998	0.298288
	1 | BP/4/908	1	5	0.068	0.241	0.309	0.119994	0	0.387435	0.079996	0.209141	0.039998	0.298288
	1 | BP/1/4983	1	5	0.049	0.123	0.172	0.119994	0	0.387435	0.079996	0.209141	0.039998	0.298288
	1 | BP/1/4245	1	5	0.165	0.11	0.275	0.119994	0	0.387435	0.079996	0.209141	0.039998	0.298288
	1 | NHCC LB18	1	5	0.167	0.395	0.562	0.119994	0	0.387435	0.079996	0.209141	0.039998	0.298288
	1 | TMMM-150	1	5	0.045	0.175	0.22	0.119994	0	0.387435	0.079996	0.209141	0.039998	0.298288
	1 | TMM-M-7283	1	5	0.021	0.1	0.121	0.119994	0	0.387435	0.079996	0.209141	0.039998	0.298288
	1 | AMNH82372	1	5	0.016	0.105	0.121	0.119994	0	0.387435	0.079996	0.209141	0.039998	0.298288
	1 | AMNH187859	1	5	0.048	0.312	0.36	0.119994	0	0.387435	0.079996	0.209141	0.039998	0.298288
	1 | TMM-M-1885	1	5	0.019	0.233	0.252	0.119994	0	0.387435	0.079996	0.209141	0.039998	0.298288
	1 | TMM-M-2517	1	5	0.047	0.172	0.219	0.119994	0	0.387435	0.079996	0.209141	0.039998	0.298288
	1 | TMM-M-171	1	5	0.06	0.359	0.419	0.119994	0	0.387435	0.079996	0.209141	0.039998	0.298288
	1 | TMM-M-968	1	5	0.058	0.162	0.22	0.119994	0	0.387435	0.079996	0.209141	0.039998	0.298288
	1 | AMNH161535	1	5	0.03	0.126	0.156	0.119994	0	0.387435	0.079996	0.209141	0.039998	0.298288
	1 | UTO-HS01	1	5	0.443	0.63	1.073	0.119994	0	0.387435	0.079996	0.209141	0.039998	0.298288
	1 | TMM-M-7500	1	5	0.056	0.211	0.267	0.119994	0	0.387435	0.079996	0.209141	0.039998	0.298288
	1 | TMM-M-5987	1	5	0.106	0.257	0.363	0.119994	0	0.387435	0.079996	0.209141	0.039998	0.298288
	1 | AMNH53896	1	5	0.045	0.399	0.444	0.119994	0	0.387435	0.079996	0.209141	0.039998	0.298288
	1 | TMM-M-7599	1	5	0.043	0.103	0.146	0.119994	0	0.387435	0.079996	0.209141	0.039998	0.298288
	1 | TMM-M-3196	1	5	0.026	0.068	0.094	0.119994	0	0.387435	0.079996	0.209141	0.039998	0.298288
	1 | AMNH51909	1	5	0.133	0.395	0.528	0.119994	0	0.387435	0.079996	0.209141	0.039998	0.298288
	1 | TMM-M-4351	1	5	0.045	0.206	0.251	0.119994	0	0.387435	0.079996	0.209141	0.039998	0.298288
	1 | AMNH237593	1	5	0.015	0.111	0.126	0.119994	0	0.387435	0.079996	0.209141	0.039998	0.298288
	1 | AMNH245591	1	5	0.038	0.086	0.124	0.119994	0	0.387435	0.079996	0.209141	0.039998	0.298288
	1 | unvouchered	1	5	0.022	0.097	0.119	0.119994	0	0.387435	0.079996	0.209141	0.039998	0.298288
	1 | TMM-M-2689	1	5	0.023	0.145	0.168	0.119994	0	0.387435	0.079996	0.209141	0.039998	0.298288
	1 | TMM-M-3030	1	5	0.023	0.133	0.156	0.119994	0	0.387435	0.079996	0.209141	0.039998	0.298288
	1 | MSW03156	1	5	0.159	0.416	0.575	0.119994	0	0.387435	0.079996	0.209141	0.039998	0.298288
	1 | TMM-M-2256	1	5	0.023	0.128	0.151	0.119994	0	0.387435	0.079996	0.209141	0.039998	0.298288
	1 | SDNHM21212	1	5	0.023	0.268	0.291	0.119994	0	0.387435	0.079996	0.209141	0.039998	0.298288
	1 | IPHEP unvouchered	1	5	0.138	0.291	0.429	0.119994	0	0.387435	0.079996	0.209141	0.039998	0.298288
	1 | UCR 3116	1	5	0.302	0.415	0.717	0.119994	0	0.387435	0.079996	0.209141	0.039998	0.298288
	1 | RMCA 83,001-M-0014	1	5	0.098	0.169	0.267	0.119994	0	0.387435	0.079996	0.209141	0.039998	0.298288
	1 | AMNH M 24289	1	5	0.068	0.242	0.31	0.119994	0	0.387435	0.079996	0.209141	0.039998	0.298288
	1 | AMNH M 53672	1	5	0.054	0.389	0.443	0.119994	0	0.387435	0.079996	0.209141	0.039998	0.298288
	1 | UM N- 228	1	5	0.043	0.394	0.437	0.119994	0	0.387435	0.079996	0.209141	0.039998	0.298288
	1 | AMNH unvouchered	1	5	0.087	0.212	0.299	0.119994	0	0.387435	0.079996	0.209141	0.039998	0.298288
	1 | UM N-671	1	5	0.278	0.202	0.48	0.119994	0	0.387435	0.079996	0.209141	0.039998	0.298288
	1 | AMNH M 2238	1	5	0.119	0.345	0.464	0.119994	0	0.387435	0.079996	0.209141	0.039998	0.298288
	1 | UM2 N-177	1	5	0.376	1.033	1.409	0.119994	0	0.387435	0.079996	0.209141	0.039998	0.298288
	1 | UM PDS 3360	1	5	0.007	0.305	0.312	0.119994	0	0.387435	0.079996	0.209141	0.039998	0.298288
	1 | UM ITD 1080	1	5	0.06	0.258	0.318	0.119994	0	0.387435	0.079996	0.209141	0.039998	0.298288
	1 | MNHN Qu1	1	5	0.118	0.473	0.591	0.119994	0	0.387435	0.079996	0.209141	0.039998	0.298288
	1 | UM N-170	1	5	0.082	0.496	0.578	0.119994	0	0.387435	0.079996	0.209141	0.039998	0.298288
	1 | UM 58V	1	5	0.075	0.19	0.265	0.119994	0	0.387435	0.079996	0.209141	0.039998	0.298288
	1 | UM PV 251212	1	5	0.182	0.792	0.974	0.119994	0	0.387435	0.079996	0.209141	0.039998	0.298288
	1 | UM N 03	1	5	0.024	0.314	0.338	0.119994	0	0.387435	0.079996	0.209141	0.039998	0.298288
	1 | UM N 785V	1	5	0.21	0.48	0.69	0.119994	0	0.387435	0.079996	0.209141	0.039998	0.298288
	1 | AMNH 268369	1	5	0.085	0.067	0.152	0.119994	0	0.387435	0.079996	0.209141	0.039998	0.298288
	1 | TMM 40882-41	1	5	0.07	0.609	0.679	0.119994	0	0.387435	0.079996	0.209141	0.039998	0.298288
	1 | BP/1/3575	1	5	0.251	0.582	0.833	0.119994	0	0.387435	0.079996	0.209141	0.039998	0.298288
	1 | NHMUK R37054	1	5	0.088	0.674	0.762	0.119994	0	0.387435	0.079996	0.209141	0.039998	0.298288
	1 | NHCC LB 117	1	5	0.207	1.124	1.331	0.119994	0	0.387435	0.079996	0.209141	0.039998	0.298288
	1 | NMT RB581	1	5	0.1	0.769	0.869	0.119994	0	0.387435	0.079996	0.209141	0.039998	0.298288
	1 | IVPP 8275	1	5	0.05	0.24	0.29	0.119994	0	0.387435	0.079996	0.209141	0.039998	0.298288
	1 | IVPP 8685	1	5	0.03	0.14	0.17	0.119994	0	0.387435	0.079996	0.209141	0.039998	0.298288
	1 | NHCC LB44	1	5	0.111	0.334	0.445	0.119994	0	0.387435	0.079996	0.209141	0.039998	0.298288
	1 | FMNH 218598	1	5	0.165	0.463	0.628	0.119994	0	0.387435	0.079996	0.209141	0.039998	0.298288
	1 | FMNH 10694	1	5	0.092	0.488	0.58	0.119994	0	0.387435	0.079996	0.209141	0.039998	0.298288
	1 | BMNH 2858	1	5	0.046	0.228	0.274	0.119994	0	0.387435	0.079996	0.209141	0.039998	0.298288
	1 | BP/1/5088	1	5	0.094	0.497	0.591	0.119994	0	0.387435	0.079996	0.209141	0.039998	0.298288
	1 | BP/1/4778	1	5	0.139	0.384	0.523	0.119994	0	0.387435	0.079996	0.209141	0.039998	0.298288
	1 | FMNH UR 27	1	5	0.144	0.894	1.038	0.119994	0	0.387435	0.079996	0.209141	0.039998	0.298288
	1 | MCZ 3778	1	5	0.15	1.4	1.55	0.119994	0	0.387435	0.079996	0.209141	0.039998	0.298288
	1 | UFRGS PV833T	1	5	0.17	0.43	0.6	0.119994	0	0.387435	0.079996	0.209141	0.039998	0.298288
	1 | UFRGS PV1043	1	5	0.06	0.29	0.35	0.119994	0	0.387435	0.079996	0.209141	0.039998	0.298288
	1 | NHMUK 7090	1	5	0.07	0.3	0.37	0.119994	0	0.387435	0.079996	0.209141	0.039998	0.298288
	1 | MG 6807 (Gui Mam 2/81)	1	5	0.043	0.156	0.199	0.119994	0	0.387435	0.079996	0.209141	0.039998	0.298288
	Box plots (Specimens):
	Scattergrams (Specimens):

## Sheet: RRX (LSC diam)
	XLSTAT 2018.1.1.62926 - Gage R&R / Quantitative - Start time: 05/05/2021 at 09:12:51
	Y / Measurements: Workbook = Supplementary-data-repeatability-analysis.xlsx / Sheet = Data / Range = Data!$F:$F / 925 rows and 1 column
	X / Operators: Workbook = Supplementary-data-repeatability-analysis.xlsx / Sheet = Data / Range = 'Data'!$B:$B / 925 rows and 1 column
	Parts: Workbook = Supplementary-data-repeatability-analysis.xlsx / Sheet = Data / Range = 'Data'!$A:$A / 925 rows and 1 column
	k Sigma: 6
	Method for sigma (subgroups): R bar
	Method: ANOVA (Crossed)
	Significance level (%): 5
	Variance components:
	Source	Gage R&R	Repeatability	Reproducibility	Between parts
	Contribution	0.0433796	0.0433796	0	0.95662
	Study Variation (SV)	0.208278	0.208278	0	0.97807
	Variance:
	Source	Variance components	Contribution
	Gage R&R	0.00627346	0.0433796
	Repeatability	0.00627346	0.0433796
	Reproducibility	0	0
	Operators	0	0
	Operators * Parts	0	0
	Between parts	0.138344	0.95662
	Total	0.144618	1
	Standard deviation:
	Source	Standard deviation	Study Variation (SV)	Study Variation (SV) %
	Gage R&R	0.0792052	0.475231	0.208278
	Repeatability	0.0792052	0.475231	0.208278
	Reproducibility	0	0	0
	Operators	0	0	0
	Operators * Parts	0	0	0
	Between parts	0.371947	2.23168	0.97807
	Total	0.380286	2.28172	1
	Status indicator:
		Value	Status
	Precision to tolerance ratio (P/T)
	Rho P	0.95662
	Rho M	0.0433796
	Signal to noise ratio (SNR)	6.64113	adequate (>+5)
	Discrimination ratio (DR)	45.1046
	Bias
	Bias %
	Resolution
	Removed variables :
	Variable	Reason
	Operator	Constant
	Specimens*Operator	The variable or the interaction of the corresponding column has no significant effect on the dependent variables.
	Goodness of fit statistics:
	Observations	925
	Sum of weights	925
	DF	740
	R²	0.965114
	Adjusted R²	0.95644
	MSE	0.00627346
	RMSE	0.0792052
	Analysis of variance:
	Source	DF	Sum of squares	Mean squares	F	Pr > F
	Parts	184	128.431	0.697995	111.261	< 0,0001
	Operators	0	0
	Operators * Parts
	Repeatability	740	4.64236	0.00627346
	Total	924	133.073
	X-bar chart (control limits):
		1
	UCL	0.673999
	CL	0.516511
	LCL	0.359022
	X-bar chart (Observation details):
		Phase	Subgroup size	Mean	Minimum	Maximum	CL	LCL	UCL	C Lower bound	C Upper bound	B Lower bound	B Upper bound
	1 | FMNH 201350	1	5	0.454	0.44	0.46	0.516511	0.359022	0.673999	0.464015	0.569007	0.411519	0.621503
	1 | FMNH 250439	1	5	0.208	0.18	0.23	0.516511	0.359022	0.673999	0.464015	0.569007	0.411519	0.621503
	1 | FMNH 165622	1	5	0.41	0.36	0.44	0.516511	0.359022	0.673999	0.464015	0.569007	0.411519	0.621503
	1 | CAS 126478	1	5	0.19	0.16	0.21	0.516511	0.359022	0.673999	0.464015	0.569007	0.411519	0.621503
	1 | FMNH 31182	1	5	0.386	0.28	0.56	0.516511	0.359022	0.673999	0.464015	0.569007	0.411519	0.621503
	1 | FMNH 260015	1	5	0.56	0.53	0.58	0.516511	0.359022	0.673999	0.464015	0.569007	0.411519	0.621503
	1 | UMMZ 190285	1	5	0.356	0.3	0.4	0.516511	0.359022	0.673999	0.464015	0.569007	0.411519	0.621503
	1 | FMNH 47572	1	5	0.364	0.32	0.44	0.516511	0.359022	0.673999	0.464015	0.569007	0.411519	0.621503
	1 | FMNH 71626	1	5	0.35	0.34	0.37	0.516511	0.359022	0.673999	0.464015	0.569007	0.411519	0.621503
	1 | YPM 12670	1	5	0.252	0.23	0.28	0.516511	0.359022	0.673999	0.464015	0.569007	0.411519	0.621503
	1 | FMNH 60958	1	5	0.252	0.2	0.29	0.516511	0.359022	0.673999	0.464015	0.569007	0.411519	0.621503
	1 | USNM 128679	1	5	0.154	0.15	0.16	0.516511	0.359022	0.673999	0.464015	0.569007	0.411519	0.621503
	1 | FMNH 221322	1	5	0.26	0.23	0.29	0.516511	0.359022	0.673999	0.464015	0.569007	0.411519	0.621503
	1 | CMNH 67524	1	5	0.296	0.28	0.32	0.516511	0.359022	0.673999	0.464015	0.569007	0.411519	0.621503
	1 | FMNH 120968	1	5	0.192	0.18	0.21	0.516511	0.359022	0.673999	0.464015	0.569007	0.411519	0.621503
	1 | FMNH 186818	1	5	0.34	0.29	0.38	0.516511	0.359022	0.673999	0.464015	0.569007	0.411519	0.621503
	1 | TNHC 64380	1	5	0.614	0.51	0.72	0.516511	0.359022	0.673999	0.464015	0.569007	0.411519	0.621503
	1 | YPM 12858	1	5	0.242	0.21	0.28	0.516511	0.359022	0.673999	0.464015	0.569007	0.411519	0.621503
	1 | FMNH 148589	1	5	0.444	0.43	0.46	0.516511	0.359022	0.673999	0.464015	0.569007	0.411519	0.621503
	1 | FMNH 202810	1	5	0.422	0.39	0.45	0.516511	0.359022	0.673999	0.464015	0.569007	0.411519	0.621503
	1 | USNM 260564	1	5	0.202	0.19	0.21	0.516511	0.359022	0.673999	0.464015	0.569007	0.411519	0.621503
	1 | LACM 136359	1	5	0.192	0.18	0.2	0.516511	0.359022	0.673999	0.464015	0.569007	0.411519	0.621503
	1 | MVZ 125659	1	5	0.21	0.18	0.24	0.516511	0.359022	0.673999	0.464015	0.569007	0.411519	0.621503
	1 | USNM 200767	1	5	0.34	0.3	0.38	0.516511	0.359022	0.673999	0.464015	0.569007	0.411519	0.621503
	1 | YPM 12870	1	5	0.438	0.4	0.47	0.516511	0.359022	0.673999	0.464015	0.569007	0.411519	0.621503
	1 | FMNH 122866	1	5	0.224	0.21	0.25	0.516511	0.359022	0.673999	0.464015	0.569007	0.411519	0.621503
	1 | YPM 9194	1	5	0.532	0.38	0.74	0.516511	0.359022	0.673999	0.464015	0.569007	0.411519	0.621503
	1 | CAS 171013	1	5	0.306	0.29	0.31	0.516511	0.359022	0.673999	0.464015	0.569007	0.411519	0.621503
	1 | TNHC 64040	1	5	0.284	0.27	0.3	0.516511	0.359022	0.673999	0.464015	0.569007	0.411519	0.621503
	1 | FMNH 22416	1	5	0.434	0.34	0.48	0.516511	0.359022	0.673999	0.464015	0.569007	0.411519	0.621503
	1 | USNM 12378	1	5	0.296	0.23	0.34	0.516511	0.359022	0.673999	0.464015	0.569007	0.411519	0.621503
	1 | FMNH 78661	1	5	0.542	0.5	0.58	0.516511	0.359022	0.673999	0.464015	0.569007	0.411519	0.621503
	1 | FMNH 167048	1	5	0.174	0.15	0.19	0.516511	0.359022	0.673999	0.464015	0.569007	0.411519	0.621503
	1 | FMNH 35144	1	5	0.952	0.85	1.08	0.516511	0.359022	0.673999	0.464015	0.569007	0.411519	0.621503
	1 | FMNH 158613	1	5	0.238	0.22	0.25	0.516511	0.359022	0.673999	0.464015	0.569007	0.411519	0.621503
	1 | FMNH 148900	1	5	0.306	0.28	0.33	0.516511	0.359022	0.673999	0.464015	0.569007	0.411519	0.621503
	1 | 1930.5.8.725	1	5	0.4324	0.393	0.473	0.516511	0.359022	0.673999	0.464015	0.569007	0.411519	0.621503
	1 | Brochu 1999 monograph	1	5	0.7514	0.675	0.829	0.516511	0.359022	0.673999	0.464015	0.569007	0.411519	0.621503
	1 | 1964.1782	1	5	0.3556	0.319	0.391	0.516511	0.359022	0.673999	0.464015	0.569007	0.411519	0.621503
	1 | 1964.179	1	5	0.2526	0.225	0.293	0.516511	0.359022	0.673999	0.464015	0.569007	0.411519	0.621503
	1 | FRIM0026; Digimorph	1	5	0.2084	0.186	0.232	0.516511	0.359022	0.673999	0.464015	0.569007	0.411519	0.621503
	1 | S/1972.1.21	1	5	0.6516	0.566	0.731	0.516511	0.359022	0.673999	0.464015	0.569007	0.411519	0.621503
	1 | S/1987.27.1	1	5	0.5	0.45	0.623	0.516511	0.359022	0.673999	0.464015	0.569007	0.411519	0.621503
	1 | S/2007.139.12	1	5	1.0724	0.833	1.166	0.516511	0.359022	0.673999	0.464015	0.569007	0.411519	0.621503
	1 | FMNH 73711; Digimorph	1	5	1.0072	0.814	1.208	0.516511	0.359022	0.673999	0.464015	0.569007	0.411519	0.621503
	1 | 1939.12.9.964	1	5	0.8816	0.796	0.996	0.516511	0.359022	0.673999	0.464015	0.569007	0.411519	0.621503
	1 | 1930.5.8.952	1	5	0.3782	0.347	0.406	0.516511	0.359022	0.673999	0.464015	0.569007	0.411519	0.621503
	1 | YPM 12690; Digimorph	1	5	0.1814	0.174	0.198	0.516511	0.359022	0.673999	0.464015	0.569007	0.411519	0.621503
	1 | 1969.2864	1	5	2.544	2.259	3.106	0.516511	0.359022	0.673999	0.464015	0.569007	0.411519	0.621503
	1 | UF22159; Digimorph	1	5	1.2668	1.125	1.411	0.516511	0.359022	0.673999	0.464015	0.569007	0.411519	0.621503
	1 | 1859.9.6.393	1	5	0.7966	0.731	0.872	0.516511	0.359022	0.673999	0.464015	0.569007	0.411519	0.621503
	1 | S/1952.1.103	1	5	0.777	0.675	0.916	0.516511	0.359022	0.673999	0.464015	0.569007	0.411519	0.621503
	1 | S/1979.66.160	1	5	0.703	0.659	0.757	0.516511	0.359022	0.673999	0.464015	0.569007	0.411519	0.621503
	1 | USNM 547842; Digimorph	1	5	0.153	0.149	0.158	0.516511	0.359022	0.673999	0.464015	0.569007	0.411519	0.621503
	1 | FMNH 75662	1	5	0.1436	0.089	0.188	0.516511	0.359022	0.673999	0.464015	0.569007	0.411519	0.621503
	1 | FMNH59071	1	5	1.6662	1.471	1.861	0.516511	0.359022	0.673999	0.464015	0.569007	0.411519	0.621503
	1 | OUVC 10425	1	5	0.6788	0.65	0.713	0.516511	0.359022	0.673999	0.464015	0.569007	0.411519	0.621503
	1 | TMM M-4980	1	5	1.2144	1.103	1.389	0.516511	0.359022	0.673999	0.464015	0.569007	0.411519	0.621503
	1 | S/1995.11.1	1	5	0.9062	0.856	0.951	0.516511	0.359022	0.673999	0.464015	0.569007	0.411519	0.621503
	1 | S/1969.1.163	1	5	0.4616	0.437	0.489	0.516511	0.359022	0.673999	0.464015	0.569007	0.411519	0.621503
	1 | FMNH 64429; Digimorph	1	5	0.17	0.16	0.191	0.516511	0.359022	0.673999	0.464015	0.569007	0.411519	0.621503
	1 | S/2001.50.1	1	5	0.764	0.718	0.86	0.516511	0.359022	0.673999	0.464015	0.569007	0.411519	0.621503
	1 | YPM 12668; Digimorph	1	5	0.2794	0.218	0.312	0.516511	0.359022	0.673999	0.464015	0.569007	0.411519	0.621503
	1 | 1792.568	1	5	0.3312	0.313	0.353	0.516511	0.359022	0.673999	0.464015	0.569007	0.411519	0.621503
	1 | TMM M-5490; Digimorph	1	5	1.1496	1.083	1.221	0.516511	0.359022	0.673999	0.464015	0.569007	0.411519	0.621503
	1 | 1983.65	1	5	0.3576	0.304	0.399	0.516511	0.359022	0.673999	0.464015	0.569007	0.411519	0.621503
	1 | 1964.1829	1	5	0.3316	0.316	0.346	0.516511	0.359022	0.673999	0.464015	0.569007	0.411519	0.621503
	1 | YPM 14379; Digimorph	1	5	0.389	0.355	0.431	0.516511	0.359022	0.673999	0.464015	0.569007	0.411519	0.621503
	1 | 1978.346	1	5	0.199	0.183	0.222	0.516511	0.359022	0.673999	0.464015	0.569007	0.411519	0.621503
	1 | TNHC 62766; Digimorph	1	5	0.4906	0.409	0.587	0.516511	0.359022	0.673999	0.464015	0.569007	0.411519	0.621503
	1 | YPM 14381; Digimorph	1	5	0.3648	0.333	0.397	0.516511	0.359022	0.673999	0.464015	0.569007	0.411519	0.621503
	1 | YPM 6057; Digimorph	1	5	0.4432	0.413	0.478	0.516511	0.359022	0.673999	0.464015	0.569007	0.411519	0.621503
	1 | 1970.1.20.135	1	5	0.3114	0.294	0.325	0.516511	0.359022	0.673999	0.464015	0.569007	0.411519	0.621503
	1 | S/1968.4.14	1	5	0.3376	0.322	0.351	0.516511	0.359022	0.673999	0.464015	0.569007	0.411519	0.621503
	1 | S/1966.51.59	1	5	0.2772	0.258	0.301	0.516511	0.359022	0.673999	0.464015	0.569007	0.411519	0.621503
	1 | 59.9.21.2	1	5	0.3914	0.344	0.447	0.516511	0.359022	0.673999	0.464015	0.569007	0.411519	0.621503
	1 | YPM 12868; Digimorph	1	5	0.3062	0.289	0.336	0.516511	0.359022	0.673999	0.464015	0.569007	0.411519	0.621503
	1 | 1978.1441	1	5	0.183	0.149	0.219	0.516511	0.359022	0.673999	0.464015	0.569007	0.411519	0.621503
	1 | S/1973.66.109	1	5	0.5248	0.489	0.555	0.516511	0.359022	0.673999	0.464015	0.569007	0.411519	0.621503
	1 | 1900.9.22.15	1	5	0.2302	0.193	0.275	0.516511	0.359022	0.673999	0.464015	0.569007	0.411519	0.621503
	1 | TNHC 62769; Digimorph	1	5	0.524	0.46	0.576	0.516511	0.359022	0.673999	0.464015	0.569007	0.411519	0.621503
	1 | NHM Unregistered Palaeontology Comparative Collection (6)9	1	5	0.2712	0.242	0.29	0.516511	0.359022	0.673999	0.464015	0.569007	0.411519	0.621503
	1 | S/1986.75.13	1	5	0.7128	0.652	0.779	0.516511	0.359022	0.673999	0.464015	0.569007	0.411519	0.621503
	1 | LDUCZ x036	1	5	0.6782	0.593	0.743	0.516511	0.359022	0.673999	0.464015	0.569007	0.411519	0.621503
	1 | UF 21341	1	5	0.77876	0.699	0.8372	0.516511	0.359022	0.673999	0.464015	0.569007	0.411519	0.621503
	1 | 1927.2.5.1	1	5	0.8484	0.826	0.878	0.516511	0.359022	0.673999	0.464015	0.569007	0.411519	0.621503
	1 | S/2002.46.1	1	5	0.2658	0.262	0.271	0.516511	0.359022	0.673999	0.464015	0.569007	0.411519	0.621503
	1 | 29a	1	5	0.673	0.646	0.688	0.516511	0.359022	0.673999	0.464015	0.569007	0.411519	0.621503
	1 | USNM211322	1	5	0.2362	0.224	0.245	0.516511	0.359022	0.673999	0.464015	0.569007	0.411519	0.621503
	1 | 1938.5.7.59	1	5	0.3308	0.323	0.347	0.516511	0.359022	0.673999	0.464015	0.569007	0.411519	0.621503
	1 | S/1981.39.1	1	5	0.5964	0.521	0.656	0.516511	0.359022	0.673999	0.464015	0.569007	0.411519	0.621503
	1 | UCA.5; Digimorph	1	5	0.523	0.48	0.543	0.516511	0.359022	0.673999	0.464015	0.569007	0.411519	0.621503
	1 | 1932.6.1.12	1	5	0.5322	0.497	0.561	0.516511	0.359022	0.673999	0.464015	0.569007	0.411519	0.621503
	1 | 97.5.31.1	1	5	0.6332	0.575	0.771	0.516511	0.359022	0.673999	0.464015	0.569007	0.411519	0.621503
	1 | UCMZ R.9586	1	5	0.82	0.734	0.979	0.516511	0.359022	0.673999	0.464015	0.569007	0.411519	0.621503
	1 | AM 6556	1	5	2.9556	2.746	3.052	0.516511	0.359022	0.673999	0.464015	0.569007	0.411519	0.621503
	1 | CG WB123	1	5	1.1454	1.127	1.169	0.516511	0.359022	0.673999	0.464015	0.569007	0.411519	0.621503
	1 | BP/1/3924	1	5	0.6244	0.406	0.742	0.516511	0.359022	0.673999	0.464015	0.569007	0.411519	0.621503
	1 | BP/1/816	1	5	0.7288	0.672	0.797	0.516511	0.359022	0.673999	0.464015	0.569007	0.411519	0.621503
	1 | NMQR1702	1	5	0.7818	0.465	1.162	0.516511	0.359022	0.673999	0.464015	0.569007	0.411519	0.621503
	1 | SAM-PK-11112	1	5	1.1272	0.589	1.427	0.516511	0.359022	0.673999	0.464015	0.569007	0.411519	0.621503
	1 | BP/1/155	1	5	0.802	0.762	0.835	0.516511	0.359022	0.673999	0.464015	0.569007	0.411519	0.621503
	1 | BP/1/216	1	5	0.5966	0.561	0.62	0.516511	0.359022	0.673999	0.464015	0.569007	0.411519	0.621503
	1 | SAM-PK-K 8797	1	5	0.6176	0.453	0.766	0.516511	0.359022	0.673999	0.464015	0.569007	0.411519	0.621503
	1 | SAM-PK-10160	1	5	0.5938	0.445	0.647	0.516511	0.359022	0.673999	0.464015	0.569007	0.411519	0.621503
	1 | NHMUK 5696	1	5	0.874	0.686	1.024	0.516511	0.359022	0.673999	0.464015	0.569007	0.411519	0.621503
	1 | BP/1/4009	1	5	0.8968	0.707	1.222	0.516511	0.359022	0.673999	0.464015	0.569007	0.411519	0.621503
	1 | BP/1/3849	1	5	0.5696	0.467	0.703	0.516511	0.359022	0.673999	0.464015	0.569007	0.411519	0.621503
	1 | BP/1/1563	1	5	0.7978	0.688	0.981	0.516511	0.359022	0.673999	0.464015	0.569007	0.411519	0.621503
	1 | BP/1/3926	1	5	0.93	0.777	1.156	0.516511	0.359022	0.673999	0.464015	0.569007	0.411519	0.621503
	1 | BP/1/4263	1	5	0.484	0.355	0.657	0.516511	0.359022	0.673999	0.464015	0.569007	0.411519	0.621503
	1 | BP/1/7199	1	5	0.2928	0.253	0.327	0.516511	0.359022	0.673999	0.464015	0.569007	0.411519	0.621503
	1 | NMQR860	1	5	1.0192	0.843	1.163	0.516511	0.359022	0.673999	0.464015	0.569007	0.411519	0.621503
	1 | AM 461	1	5	0.7462	0.606	0.888	0.516511	0.359022	0.673999	0.464015	0.569007	0.411519	0.621503
	1 | BP/1/4658	1	5	0.6652	0.541	0.766	0.516511	0.359022	0.673999	0.464015	0.569007	0.411519	0.621503
	1 | BP/1/4534	1	5	0.6796	0.517	0.99	0.516511	0.359022	0.673999	0.464015	0.569007	0.411519	0.621503
	1 | BP/1/2669	1	5	0.5984	0.524	0.665	0.516511	0.359022	0.673999	0.464015	0.569007	0.411519	0.621503
	1 | MS86	1	5	0.4092	0.335	0.493	0.516511	0.359022	0.673999	0.464015	0.569007	0.411519	0.621503
	1 | BP/4/908	1	5	0.3432	0.292	0.465	0.516511	0.359022	0.673999	0.464015	0.569007	0.411519	0.621503
	1 | BP/1/4983	1	5	0.1688	0.133	0.218	0.516511	0.359022	0.673999	0.464015	0.569007	0.411519	0.621503
	1 | BP/1/4245	1	5	0.5428	0.459	0.604	0.516511	0.359022	0.673999	0.464015	0.569007	0.411519	0.621503
	1 | NHCC LB18	1	5	0.601	0.512	0.704	0.516511	0.359022	0.673999	0.464015	0.569007	0.411519	0.621503
	1 | TMMM-150	1	5	0.2486	0.23	0.27	0.516511	0.359022	0.673999	0.464015	0.569007	0.411519	0.621503
	1 | TMM-M-7283	1	5	0.1524	0.084	0.192	0.516511	0.359022	0.673999	0.464015	0.569007	0.411519	0.621503
	1 | AMNH82372	1	5	0.165	0.125	0.193	0.516511	0.359022	0.673999	0.464015	0.569007	0.411519	0.621503
	1 | AMNH187859	1	5	0.2962	0.262	0.321	0.516511	0.359022	0.673999	0.464015	0.569007	0.411519	0.621503
	1 | TMM-M-1885	1	5	0.28	0.262	0.289	0.516511	0.359022	0.673999	0.464015	0.569007	0.411519	0.621503
	1 | TMM-M-2517	1	5	0.269	0.259	0.277	0.516511	0.359022	0.673999	0.464015	0.569007	0.411519	0.621503
	1 | TMM-M-171	1	5	0.5056	0.424	0.688	0.516511	0.359022	0.673999	0.464015	0.569007	0.411519	0.621503
	1 | TMM-M-968	1	5	0.1784	0.158	0.201	0.516511	0.359022	0.673999	0.464015	0.569007	0.411519	0.621503
	1 | AMNH161535	1	5	0.156	0.14	0.166	0.516511	0.359022	0.673999	0.464015	0.569007	0.411519	0.621503
	1 | UTO-HS01	1	5	0.8208	0.73	0.967	0.516511	0.359022	0.673999	0.464015	0.569007	0.411519	0.621503
	1 | TMM-M-7500	1	5	0.2502	0.226	0.261	0.516511	0.359022	0.673999	0.464015	0.569007	0.411519	0.621503
	1 | TMM-M-5987	1	5	0.3014	0.268	0.353	0.516511	0.359022	0.673999	0.464015	0.569007	0.411519	0.621503
	1 | AMNH53896	1	5	0.4424	0.403	0.488	0.516511	0.359022	0.673999	0.464015	0.569007	0.411519	0.621503
	1 | TMM-M-7599	1	5	0.1598	0.134	0.186	0.516511	0.359022	0.673999	0.464015	0.569007	0.411519	0.621503
	1 | TMM-M-3196	1	5	0.1136	0.106	0.137	0.516511	0.359022	0.673999	0.464015	0.569007	0.411519	0.621503
	1 | AMNH51909	1	5	0.4778	0.445	0.508	0.516511	0.359022	0.673999	0.464015	0.569007	0.411519	0.621503
	1 | TMM-M-4351	1	5	0.2156	0.193	0.231	0.516511	0.359022	0.673999	0.464015	0.569007	0.411519	0.621503
	1 | AMNH237593	1	5	0.1402	0.112	0.155	0.516511	0.359022	0.673999	0.464015	0.569007	0.411519	0.621503
	1 | AMNH245591	1	5	0.1036	0.081	0.133	0.516511	0.359022	0.673999	0.464015	0.569007	0.411519	0.621503
	1 | unvouchered	1	5	0.1278	0.111	0.14	0.516511	0.359022	0.673999	0.464015	0.569007	0.411519	0.621503
	1 | TMM-M-2689	1	5	0.1422	0.125	0.159	0.516511	0.359022	0.673999	0.464015	0.569007	0.411519	0.621503
	1 | TMM-M-3030	1	5	0.1644	0.15	0.171	0.516511	0.359022	0.673999	0.464015	0.569007	0.411519	0.621503
	1 | MSW03156	1	5	0.495	0.414	0.68	0.516511	0.359022	0.673999	0.464015	0.569007	0.411519	0.621503
	1 | TMM-M-2256	1	5	0.138	0.129	0.153	0.516511	0.359022	0.673999	0.464015	0.569007	0.411519	0.621503
	1 | SDNHM21212	1	5	0.333	0.331	0.337	0.516511	0.359022	0.673999	0.464015	0.569007	0.411519	0.621503
	1 | IPHEP unvouchered	1	5	0.2472	0.189	0.329	0.516511	0.359022	0.673999	0.464015	0.569007	0.411519	0.621503
	1 | UCR 3116	1	5	0.659	0.578	0.78	0.516511	0.359022	0.673999	0.464015	0.569007	0.411519	0.621503
	1 | RMCA 83,001-M-0014	1	5	0.199	0.166	0.228	0.516511	0.359022	0.673999	0.464015	0.569007	0.411519	0.621503
	1 | AMNH M 24289	1	5	0.3362	0.319	0.367	0.516511	0.359022	0.673999	0.464015	0.569007	0.411519	0.621503
	1 | AMNH M 53672	1	5	0.4314	0.42	0.45	0.516511	0.359022	0.673999	0.464015	0.569007	0.411519	0.621503
	1 | UM N- 228	1	5	0.406	0.334	0.537	0.516511	0.359022	0.673999	0.464015	0.569007	0.411519	0.621503
	1 | AMNH unvouchered	1	5	0.3344	0.324	0.343	0.516511	0.359022	0.673999	0.464015	0.569007	0.411519	0.621503
	1 | UM N-671	1	5	0.5402	0.378	0.641	0.516511	0.359022	0.673999	0.464015	0.569007	0.411519	0.621503
	1 | AMNH M 2238	1	5	0.4456	0.381	0.512	0.516511	0.359022	0.673999	0.464015	0.569007	0.411519	0.621503
	1 | UM2 N-177	1	5	1.1214	0.863	1.233	0.516511	0.359022	0.673999	0.464015	0.569007	0.411519	0.621503
	1 | UM PDS 3360	1	5	0.336	0.292	0.374	0.516511	0.359022	0.673999	0.464015	0.569007	0.411519	0.621503
	1 | UM ITD 1080	1	5	0.3964	0.358	0.46	0.516511	0.359022	0.673999	0.464015	0.569007	0.411519	0.621503
	1 | MNHN Qu1	1	5	0.4378	0.386	0.492	0.516511	0.359022	0.673999	0.464015	0.569007	0.411519	0.621503
	1 | UM N-170	1	5	0.541	0.507	0.565	0.516511	0.359022	0.673999	0.464015	0.569007	0.411519	0.621503
	1 | UM 58V	1	5	0.2792	0.232	0.313	0.516511	0.359022	0.673999	0.464015	0.569007	0.411519	0.621503
	1 | UM PV 251212	1	5	0.8938	0.763	1.031	0.516511	0.359022	0.673999	0.464015	0.569007	0.411519	0.621503
	1 | UM N 03	1	5	0.3872	0.369	0.415	0.516511	0.359022	0.673999	0.464015	0.569007	0.411519	0.621503
	1 | UM N 785V	1	5	0.6774	0.52	0.832	0.516511	0.359022	0.673999	0.464015	0.569007	0.411519	0.621503
	1 | AMNH 268369	1	5	0.1592	0.073	0.25	0.516511	0.359022	0.673999	0.464015	0.569007	0.411519	0.621503
	1 | TMM 40882-41	1	5	0.7206	0.603	0.785	0.516511	0.359022	0.673999	0.464015	0.569007	0.411519	0.621503
	1 | BP/1/3575	1	5	0.8504	0.815	0.897	0.516511	0.359022	0.673999	0.464015	0.569007	0.411519	0.621503
	1 | NHMUK R37054	1	5	1.0932	0.864	1.26	0.516511	0.359022	0.673999	0.464015	0.569007	0.411519	0.621503
	1 | NHCC LB 117	1	5	0.9726	0.79	1.24	0.516511	0.359022	0.673999	0.464015	0.569007	0.411519	0.621503
	1 | NMT RB581	1	5	1.17836	1.003	1.33	0.516511	0.359022	0.673999	0.464015	0.569007	0.411519	0.621503
	1 | IVPP 8275	1	5	0.284	0.24	0.33	0.516511	0.359022	0.673999	0.464015	0.569007	0.411519	0.621503
	1 | IVPP 8685	1	5	0.146	0.11	0.17	0.516511	0.359022	0.673999	0.464015	0.569007	0.411519	0.621503
	1 | NHCC LB44	1	5	0.773	0.72	0.825	0.516511	0.359022	0.673999	0.464015	0.569007	0.411519	0.621503
	1 | FMNH 218598	1	5	0.5822	0.543	0.625	0.516511	0.359022	0.673999	0.464015	0.569007	0.411519	0.621503
	1 | FMNH 10694	1	5	0.701	0.632	0.782	0.516511	0.359022	0.673999	0.464015	0.569007	0.411519	0.621503
	1 | BMNH 2858	1	5	0.2146	0.19	0.271	0.516511	0.359022	0.673999	0.464015	0.569007	0.411519	0.621503
	1 | BP/1/5088	1	5	0.519	0.463	0.581	0.516511	0.359022	0.673999	0.464015	0.569007	0.411519	0.621503
	1 | BP/1/4778	1	5	0.7266	0.656	0.78	0.516511	0.359022	0.673999	0.464015	0.569007	0.411519	0.621503
	1 | FMNH UR 27	1	5	1.1082	0.89	1.242	0.516511	0.359022	0.673999	0.464015	0.569007	0.411519	0.621503
	1 | MCZ 3778	1	5	1.01	0.9	1.08	0.516511	0.359022	0.673999	0.464015	0.569007	0.411519	0.621503
	1 | UFRGS PV833T	1	5	0.76	0.56	0.88	0.516511	0.359022	0.673999	0.464015	0.569007	0.411519	0.621503
	1 | UFRGS PV1043	1	5	0.394	0.36	0.42	0.516511	0.359022	0.673999	0.464015	0.569007	0.411519	0.621503
	1 | NHMUK 7090	1	5	0.51	0.46	0.58	0.516511	0.359022	0.673999	0.464015	0.569007	0.411519	0.621503
	1 | MG 6807 (Gui Mam 2/81)	1	5	0.2578	0.235	0.267	0.516511	0.359022	0.673999	0.464015	0.569007	0.411519	0.621503
	R chart (control limits):
		1
	UCL	0.440777
	CL	0.136515
	LCL	0
	R chart (Observation details):
		Phase	Subgroup size	Mean	Minimum	Maximum	CL	LCL	UCL	C Lower bound	C Upper bound	B Lower bound	B Upper bound
	1 | FMNH 201350	1	5	0.02	0.44	0.46	0.136515	0	0.440777	0.0910097	0.237935	0.0455049	0.339356
	1 | FMNH 250439	1	5	0.05	0.18	0.23	0.136515	0	0.440777	0.0910097	0.237935	0.0455049	0.339356
	1 | FMNH 165622	1	5	0.08	0.36	0.44	0.136515	0	0.440777	0.0910097	0.237935	0.0455049	0.339356
	1 | CAS 126478	1	5	0.05	0.16	0.21	0.136515	0	0.440777	0.0910097	0.237935	0.0455049	0.339356
	1 | FMNH 31182	1	5	0.28	0.28	0.56	0.136515	0	0.440777	0.0910097	0.237935	0.0455049	0.339356
	1 | FMNH 260015	1	5	0.05	0.53	0.58	0.136515	0	0.440777	0.0910097	0.237935	0.0455049	0.339356
	1 | UMMZ 190285	1	5	0.1	0.3	0.4	0.136515	0	0.440777	0.0910097	0.237935	0.0455049	0.339356
	1 | FMNH 47572	1	5	0.12	0.32	0.44	0.136515	0	0.440777	0.0910097	0.237935	0.0455049	0.339356
	1 | FMNH 71626	1	5	0.03	0.34	0.37	0.136515	0	0.440777	0.0910097	0.237935	0.0455049	0.339356
	1 | YPM 12670	1	5	0.05	0.23	0.28	0.136515	0	0.440777	0.0910097	0.237935	0.0455049	0.339356
	1 | FMNH 60958	1	5	0.09	0.2	0.29	0.136515	0	0.440777	0.0910097	0.237935	0.0455049	0.339356
	1 | USNM 128679	1	5	0.01	0.15	0.16	0.136515	0	0.440777	0.0910097	0.237935	0.0455049	0.339356
	1 | FMNH 221322	1	5	0.06	0.23	0.29	0.136515	0	0.440777	0.0910097	0.237935	0.0455049	0.339356
	1 | CMNH 67524	1	5	0.04	0.28	0.32	0.136515	0	0.440777	0.0910097	0.237935	0.0455049	0.339356
	1 | FMNH 120968	1	5	0.03	0.18	0.21	0.136515	0	0.440777	0.0910097	0.237935	0.0455049	0.339356
	1 | FMNH 186818	1	5	0.09	0.29	0.38	0.136515	0	0.440777	0.0910097	0.237935	0.0455049	0.339356
	1 | TNHC 64380	1	5	0.21	0.51	0.72	0.136515	0	0.440777	0.0910097	0.237935	0.0455049	0.339356
	1 | YPM 12858	1	5	0.07	0.21	0.28	0.136515	0	0.440777	0.0910097	0.237935	0.0455049	0.339356
	1 | FMNH 148589	1	5	0.03	0.43	0.46	0.136515	0	0.440777	0.0910097	0.237935	0.0455049	0.339356
	1 | FMNH 202810	1	5	0.06	0.39	0.45	0.136515	0	0.440777	0.0910097	0.237935	0.0455049	0.339356
	1 | USNM 260564	1	5	0.02	0.19	0.21	0.136515	0	0.440777	0.0910097	0.237935	0.0455049	0.339356
	1 | LACM 136359	1	5	0.02	0.18	0.2	0.136515	0	0.440777	0.0910097	0.237935	0.0455049	0.339356
	1 | MVZ 125659	1	5	0.06	0.18	0.24	0.136515	0	0.440777	0.0910097	0.237935	0.0455049	0.339356
	1 | USNM 200767	1	5	0.08	0.3	0.38	0.136515	0	0.440777	0.0910097	0.237935	0.0455049	0.339356
	1 | YPM 12870	1	5	0.07	0.4	0.47	0.136515	0	0.440777	0.0910097	0.237935	0.0455049	0.339356
	1 | FMNH 122866	1	5	0.04	0.21	0.25	0.136515	0	0.440777	0.0910097	0.237935	0.0455049	0.339356
	1 | YPM 9194	1	5	0.36	0.38	0.74	0.136515	0	0.440777	0.0910097	0.237935	0.0455049	0.339356
	1 | CAS 171013	1	5	0.02	0.29	0.31	0.136515	0	0.440777	0.0910097	0.237935	0.0455049	0.339356
	1 | TNHC 64040	1	5	0.03	0.27	0.3	0.136515	0	0.440777	0.0910097	0.237935	0.0455049	0.339356
	1 | FMNH 22416	1	5	0.14	0.34	0.48	0.136515	0	0.440777	0.0910097	0.237935	0.0455049	0.339356
	1 | USNM 12378	1	5	0.11	0.23	0.34	0.136515	0	0.440777	0.0910097	0.237935	0.0455049	0.339356
	1 | FMNH 78661	1	5	0.08	0.5	0.58	0.136515	0	0.440777	0.0910097	0.237935	0.0455049	0.339356
	1 | FMNH 167048	1	5	0.04	0.15	0.19	0.136515	0	0.440777	0.0910097	0.237935	0.0455049	0.339356
	1 | FMNH 35144	1	5	0.23	0.85	1.08	0.136515	0	0.440777	0.0910097	0.237935	0.0455049	0.339356
	1 | FMNH 158613	1	5	0.03	0.22	0.25	0.136515	0	0.440777	0.0910097	0.237935	0.0455049	0.339356
	1 | FMNH 148900	1	5	0.05	0.28	0.33	0.136515	0	0.440777	0.0910097	0.237935	0.0455049	0.339356
	1 | 1930.5.8.725	1	5	0.08	0.393	0.473	0.136515	0	0.440777	0.0910097	0.237935	0.0455049	0.339356
	1 | Brochu 1999 monograph	1	5	0.154	0.675	0.829	0.136515	0	0.440777	0.0910097	0.237935	0.0455049	0.339356
	1 | 1964.1782	1	5	0.072	0.319	0.391	0.136515	0	0.440777	0.0910097	0.237935	0.0455049	0.339356
	1 | 1964.179	1	5	0.068	0.225	0.293	0.136515	0	0.440777	0.0910097	0.237935	0.0455049	0.339356
	1 | FRIM0026; Digimorph	1	5	0.046	0.186	0.232	0.136515	0	0.440777	0.0910097	0.237935	0.0455049	0.339356
	1 | S/1972.1.21	1	5	0.165	0.566	0.731	0.136515	0	0.440777	0.0910097	0.237935	0.0455049	0.339356
	1 | S/1987.27.1	1	5	0.173	0.45	0.623	0.136515	0	0.440777	0.0910097	0.237935	0.0455049	0.339356
	1 | S/2007.139.12	1	5	0.333	0.833	1.166	0.136515	0	0.440777	0.0910097	0.237935	0.0455049	0.339356
	1 | FMNH 73711; Digimorph	1	5	0.394	0.814	1.208	0.136515	0	0.440777	0.0910097	0.237935	0.0455049	0.339356
	1 | 1939.12.9.964	1	5	0.2	0.796	0.996	0.136515	0	0.440777	0.0910097	0.237935	0.0455049	0.339356
	1 | 1930.5.8.952	1	5	0.059	0.347	0.406	0.136515	0	0.440777	0.0910097	0.237935	0.0455049	0.339356
	1 | YPM 12690; Digimorph	1	5	0.024	0.174	0.198	0.136515	0	0.440777	0.0910097	0.237935	0.0455049	0.339356
	1 | 1969.2864	1	5	0.847	2.259	3.106	0.136515	0	0.440777	0.0910097	0.237935	0.0455049	0.339356
	1 | UF22159; Digimorph	1	5	0.286	1.125	1.411	0.136515	0	0.440777	0.0910097	0.237935	0.0455049	0.339356
	1 | 1859.9.6.393	1	5	0.141	0.731	0.872	0.136515	0	0.440777	0.0910097	0.237935	0.0455049	0.339356
	1 | S/1952.1.103	1	5	0.241	0.675	0.916	0.136515	0	0.440777	0.0910097	0.237935	0.0455049	0.339356
	1 | S/1979.66.160	1	5	0.098	0.659	0.757	0.136515	0	0.440777	0.0910097	0.237935	0.0455049	0.339356
	1 | USNM 547842; Digimorph	1	5	0.009	0.149	0.158	0.136515	0	0.440777	0.0910097	0.237935	0.0455049	0.339356
	1 | FMNH 75662	1	5	0.099	0.089	0.188	0.136515	0	0.440777	0.0910097	0.237935	0.0455049	0.339356
	1 | FMNH59071	1	5	0.39	1.471	1.861	0.136515	0	0.440777	0.0910097	0.237935	0.0455049	0.339356
	1 | OUVC 10425	1	5	0.063	0.65	0.713	0.136515	0	0.440777	0.0910097	0.237935	0.0455049	0.339356
	1 | TMM M-4980	1	5	0.286	1.103	1.389	0.136515	0	0.440777	0.0910097	0.237935	0.0455049	0.339356
	1 | S/1995.11.1	1	5	0.095	0.856	0.951	0.136515	0	0.440777	0.0910097	0.237935	0.0455049	0.339356
	1 | S/1969.1.163	1	5	0.052	0.437	0.489	0.136515	0	0.440777	0.0910097	0.237935	0.0455049	0.339356
	1 | FMNH 64429; Digimorph	1	5	0.031	0.16	0.191	0.136515	0	0.440777	0.0910097	0.237935	0.0455049	0.339356
	1 | S/2001.50.1	1	5	0.142	0.718	0.86	0.136515	0	0.440777	0.0910097	0.237935	0.0455049	0.339356
	1 | YPM 12668; Digimorph	1	5	0.094	0.218	0.312	0.136515	0	0.440777	0.0910097	0.237935	0.0455049	0.339356
	1 | 1792.568	1	5	0.04	0.313	0.353	0.136515	0	0.440777	0.0910097	0.237935	0.0455049	0.339356
	1 | TMM M-5490; Digimorph	1	5	0.138	1.083	1.221	0.136515	0	0.440777	0.0910097	0.237935	0.0455049	0.339356
	1 | 1983.65	1	5	0.095	0.304	0.399	0.136515	0	0.440777	0.0910097	0.237935	0.0455049	0.339356
	1 | 1964.1829	1	5	0.03	0.316	0.346	0.136515	0	0.440777	0.0910097	0.237935	0.0455049	0.339356
	1 | YPM 14379; Digimorph	1	5	0.076	0.355	0.431	0.136515	0	0.440777	0.0910097	0.237935	0.0455049	0.339356
	1 | 1978.346	1	5	0.039	0.183	0.222	0.136515	0	0.440777	0.0910097	0.237935	0.0455049	0.339356
	1 | TNHC 62766; Digimorph	1	5	0.178	0.409	0.587	0.136515	0	0.440777	0.0910097	0.237935	0.0455049	0.339356
	1 | YPM 14381; Digimorph	1	5	0.064	0.333	0.397	0.136515	0	0.440777	0.0910097	0.237935	0.0455049	0.339356
	1 | YPM 6057; Digimorph	1	5	0.065	0.413	0.478	0.136515	0	0.440777	0.0910097	0.237935	0.0455049	0.339356
	1 | 1970.1.20.135	1	5	0.031	0.294	0.325	0.136515	0	0.440777	0.0910097	0.237935	0.0455049	0.339356
	1 | S/1968.4.14	1	5	0.029	0.322	0.351	0.136515	0	0.440777	0.0910097	0.237935	0.0455049	0.339356
	1 | S/1966.51.59	1	5	0.043	0.258	0.301	0.136515	0	0.440777	0.0910097	0.237935	0.0455049	0.339356
	1 | 59.9.21.2	1	5	0.103	0.344	0.447	0.136515	0	0.440777	0.0910097	0.237935	0.0455049	0.339356
	1 | YPM 12868; Digimorph	1	5	0.047	0.289	0.336	0.136515	0	0.440777	0.0910097	0.237935	0.0455049	0.339356
	1 | 1978.1441	1	5	0.07	0.149	0.219	0.136515	0	0.440777	0.0910097	0.237935	0.0455049	0.339356
	1 | S/1973.66.109	1	5	0.066	0.489	0.555	0.136515	0	0.440777	0.0910097	0.237935	0.0455049	0.339356
	1 | 1900.9.22.15	1	5	0.082	0.193	0.275	0.136515	0	0.440777	0.0910097	0.237935	0.0455049	0.339356
	1 | TNHC 62769; Digimorph	1	5	0.116	0.46	0.576	0.136515	0	0.440777	0.0910097	0.237935	0.0455049	0.339356
	1 | NHM Unregistered Palaeontology Comparative Collection (6)9	1	5	0.048	0.242	0.29	0.136515	0	0.440777	0.0910097	0.237935	0.0455049	0.339356
	1 | S/1986.75.13	1	5	0.127	0.652	0.779	0.136515	0	0.440777	0.0910097	0.237935	0.0455049	0.339356
	1 | LDUCZ x036	1	5	0.15	0.593	0.743	0.136515	0	0.440777	0.0910097	0.237935	0.0455049	0.339356
	1 | UF 21341	1	5	0.1382	0.699	0.8372	0.136515	0	0.440777	0.0910097	0.237935	0.0455049	0.339356
	1 | 1927.2.5.1	1	5	0.052	0.826	0.878	0.136515	0	0.440777	0.0910097	0.237935	0.0455049	0.339356
	1 | S/2002.46.1	1	5	0.009	0.262	0.271	0.136515	0	0.440777	0.0910097	0.237935	0.0455049	0.339356
	1 | 29a	1	5	0.042	0.646	0.688	0.136515	0	0.440777	0.0910097	0.237935	0.0455049	0.339356
	1 | USNM211322	1	5	0.021	0.224	0.245	0.136515	0	0.440777	0.0910097	0.237935	0.0455049	0.339356
	1 | 1938.5.7.59	1	5	0.024	0.323	0.347	0.136515	0	0.440777	0.0910097	0.237935	0.0455049	0.339356
	1 | S/1981.39.1	1	5	0.135	0.521	0.656	0.136515	0	0.440777	0.0910097	0.237935	0.0455049	0.339356
	1 | UCA.5; Digimorph	1	5	0.063	0.48	0.543	0.136515	0	0.440777	0.0910097	0.237935	0.0455049	0.339356
	1 | 1932.6.1.12	1	5	0.064	0.497	0.561	0.136515	0	0.440777	0.0910097	0.237935	0.0455049	0.339356
	1 | 97.5.31.1	1	5	0.196	0.575	0.771	0.136515	0	0.440777	0.0910097	0.237935	0.0455049	0.339356
	1 | UCMZ R.9586	1	5	0.245	0.734	0.979	0.136515	0	0.440777	0.0910097	0.237935	0.0455049	0.339356
	1 | AM 6556	1	5	0.306	2.746	3.052	0.136515	0	0.440777	0.0910097	0.237935	0.0455049	0.339356
	1 | CG WB123	1	5	0.042	1.127	1.169	0.136515	0	0.440777	0.0910097	0.237935	0.0455049	0.339356
	1 | BP/1/3924	1	5	0.336	0.406	0.742	0.136515	0	0.440777	0.0910097	0.237935	0.0455049	0.339356
	1 | BP/1/816	1	5	0.125	0.672	0.797	0.136515	0	0.440777	0.0910097	0.237935	0.0455049	0.339356
	1 | NMQR1702	1	5	0.697	0.465	1.162	0.136515	0	0.440777	0.0910097	0.237935	0.0455049	0.339356
	1 | SAM-PK-11112	1	5	0.838	0.589	1.427	0.136515	0	0.440777	0.0910097	0.237935	0.0455049	0.339356
	1 | BP/1/155	1	5	0.073	0.762	0.835	0.136515	0	0.440777	0.0910097	0.237935	0.0455049	0.339356
	1 | BP/1/216	1	5	0.059	0.561	0.62	0.136515	0	0.440777	0.0910097	0.237935	0.0455049	0.339356
	1 | SAM-PK-K 8797	1	5	0.313	0.453	0.766	0.136515	0	0.440777	0.0910097	0.237935	0.0455049	0.339356
	1 | SAM-PK-10160	1	5	0.202	0.445	0.647	0.136515	0	0.440777	0.0910097	0.237935	0.0455049	0.339356
	1 | NHMUK 5696	1	5	0.338	0.686	1.024	0.136515	0	0.440777	0.0910097	0.237935	0.0455049	0.339356
	1 | BP/1/4009	1	5	0.515	0.707	1.222	0.136515	0	0.440777	0.0910097	0.237935	0.0455049	0.339356
	1 | BP/1/3849	1	5	0.236	0.467	0.703	0.136515	0	0.440777	0.0910097	0.237935	0.0455049	0.339356
	1 | BP/1/1563	1	5	0.293	0.688	0.981	0.136515	0	0.440777	0.0910097	0.237935	0.0455049	0.339356
	1 | BP/1/3926	1	5	0.379	0.777	1.156	0.136515	0	0.440777	0.0910097	0.237935	0.0455049	0.339356
	1 | BP/1/4263	1	5	0.302	0.355	0.657	0.136515	0	0.440777	0.0910097	0.237935	0.0455049	0.339356
	1 | BP/1/7199	1	5	0.074	0.253	0.327	0.136515	0	0.440777	0.0910097	0.237935	0.0455049	0.339356
	1 | NMQR860	1	5	0.32	0.843	1.163	0.136515	0	0.440777	0.0910097	0.237935	0.0455049	0.339356
	1 | AM 461	1	5	0.282	0.606	0.888	0.136515	0	0.440777	0.0910097	0.237935	0.0455049	0.339356
	1 | BP/1/4658	1	5	0.225	0.541	0.766	0.136515	0	0.440777	0.0910097	0.237935	0.0455049	0.339356
	1 | BP/1/4534	1	5	0.473	0.517	0.99	0.136515	0	0.440777	0.0910097	0.237935	0.0455049	0.339356
	1 | BP/1/2669	1	5	0.141	0.524	0.665	0.136515	0	0.440777	0.0910097	0.237935	0.0455049	0.339356
	1 | MS86	1	5	0.158	0.335	0.493	0.136515	0	0.440777	0.0910097	0.237935	0.0455049	0.339356
	1 | BP/4/908	1	5	0.173	0.292	0.465	0.136515	0	0.440777	0.0910097	0.237935	0.0455049	0.339356
	1 | BP/1/4983	1	5	0.085	0.133	0.218	0.136515	0	0.440777	0.0910097	0.237935	0.0455049	0.339356
	1 | BP/1/4245	1	5	0.145	0.459	0.604	0.136515	0	0.440777	0.0910097	0.237935	0.0455049	0.339356
	1 | NHCC LB18	1	5	0.192	0.512	0.704	0.136515	0	0.440777	0.0910097	0.237935	0.0455049	0.339356
	1 | TMMM-150	1	5	0.04	0.23	0.27	0.136515	0	0.440777	0.0910097	0.237935	0.0455049	0.339356
	1 | TMM-M-7283	1	5	0.108	0.084	0.192	0.136515	0	0.440777	0.0910097	0.237935	0.0455049	0.339356
	1 | AMNH82372	1	5	0.068	0.125	0.193	0.136515	0	0.440777	0.0910097	0.237935	0.0455049	0.339356
	1 | AMNH187859	1	5	0.059	0.262	0.321	0.136515	0	0.440777	0.0910097	0.237935	0.0455049	0.339356
	1 | TMM-M-1885	1	5	0.027	0.262	0.289	0.136515	0	0.440777	0.0910097	0.237935	0.0455049	0.339356
	1 | TMM-M-2517	1	5	0.018	0.259	0.277	0.136515	0	0.440777	0.0910097	0.237935	0.0455049	0.339356
	1 | TMM-M-171	1	5	0.264	0.424	0.688	0.136515	0	0.440777	0.0910097	0.237935	0.0455049	0.339356
	1 | TMM-M-968	1	5	0.043	0.158	0.201	0.136515	0	0.440777	0.0910097	0.237935	0.0455049	0.339356
	1 | AMNH161535	1	5	0.026	0.14	0.166	0.136515	0	0.440777	0.0910097	0.237935	0.0455049	0.339356
	1 | UTO-HS01	1	5	0.237	0.73	0.967	0.136515	0	0.440777	0.0910097	0.237935	0.0455049	0.339356
	1 | TMM-M-7500	1	5	0.035	0.226	0.261	0.136515	0	0.440777	0.0910097	0.237935	0.0455049	0.339356
	1 | TMM-M-5987	1	5	0.085	0.268	0.353	0.136515	0	0.440777	0.0910097	0.237935	0.0455049	0.339356
	1 | AMNH53896	1	5	0.085	0.403	0.488	0.136515	0	0.440777	0.0910097	0.237935	0.0455049	0.339356
	1 | TMM-M-7599	1	5	0.052	0.134	0.186	0.136515	0	0.440777	0.0910097	0.237935	0.0455049	0.339356
	1 | TMM-M-3196	1	5	0.031	0.106	0.137	0.136515	0	0.440777	0.0910097	0.237935	0.0455049	0.339356
	1 | AMNH51909	1	5	0.063	0.445	0.508	0.136515	0	0.440777	0.0910097	0.237935	0.0455049	0.339356
	1 | TMM-M-4351	1	5	0.038	0.193	0.231	0.136515	0	0.440777	0.0910097	0.237935	0.0455049	0.339356
	1 | AMNH237593	1	5	0.043	0.112	0.155	0.136515	0	0.440777	0.0910097	0.237935	0.0455049	0.339356
	1 | AMNH245591	1	5	0.052	0.081	0.133	0.136515	0	0.440777	0.0910097	0.237935	0.0455049	0.339356
	1 | unvouchered	1	5	0.029	0.111	0.14	0.136515	0	0.440777	0.0910097	0.237935	0.0455049	0.339356
	1 | TMM-M-2689	1	5	0.034	0.125	0.159	0.136515	0	0.440777	0.0910097	0.237935	0.0455049	0.339356
	1 | TMM-M-3030	1	5	0.021	0.15	0.171	0.136515	0	0.440777	0.0910097	0.237935	0.0455049	0.339356
	1 | MSW03156	1	5	0.266	0.414	0.68	0.136515	0	0.440777	0.0910097	0.237935	0.0455049	0.339356
	1 | TMM-M-2256	1	5	0.024	0.129	0.153	0.136515	0	0.440777	0.0910097	0.237935	0.0455049	0.339356
	1 | SDNHM21212	1	5	0.006	0.331	0.337	0.136515	0	0.440777	0.0910097	0.237935	0.0455049	0.339356
	1 | IPHEP unvouchered	1	5	0.14	0.189	0.329	0.136515	0	0.440777	0.0910097	0.237935	0.0455049	0.339356
	1 | UCR 3116	1	5	0.202	0.578	0.78	0.136515	0	0.440777	0.0910097	0.237935	0.0455049	0.339356
	1 | RMCA 83,001-M-0014	1	5	0.062	0.166	0.228	0.136515	0	0.440777	0.0910097	0.237935	0.0455049	0.339356
	1 | AMNH M 24289	1	5	0.048	0.319	0.367	0.136515	0	0.440777	0.0910097	0.237935	0.0455049	0.339356
	1 | AMNH M 53672	1	5	0.03	0.42	0.45	0.136515	0	0.440777	0.0910097	0.237935	0.0455049	0.339356
	1 | UM N- 228	1	5	0.203	0.334	0.537	0.136515	0	0.440777	0.0910097	0.237935	0.0455049	0.339356
	1 | AMNH unvouchered	1	5	0.019	0.324	0.343	0.136515	0	0.440777	0.0910097	0.237935	0.0455049	0.339356
	1 | UM N-671	1	5	0.263	0.378	0.641	0.136515	0	0.440777	0.0910097	0.237935	0.0455049	0.339356
	1 | AMNH M 2238	1	5	0.131	0.381	0.512	0.136515	0	0.440777	0.0910097	0.237935	0.0455049	0.339356
	1 | UM2 N-177	1	5	0.37	0.863	1.233	0.136515	0	0.440777	0.0910097	0.237935	0.0455049	0.339356
	1 | UM PDS 3360	1	5	0.082	0.292	0.374	0.136515	0	0.440777	0.0910097	0.237935	0.0455049	0.339356
	1 | UM ITD 1080	1	5	0.102	0.358	0.46	0.136515	0	0.440777	0.0910097	0.237935	0.0455049	0.339356
	1 | MNHN Qu1	1	5	0.106	0.386	0.492	0.136515	0	0.440777	0.0910097	0.237935	0.0455049	0.339356
	1 | UM N-170	1	5	0.058	0.507	0.565	0.136515	0	0.440777	0.0910097	0.237935	0.0455049	0.339356
	1 | UM 58V	1	5	0.081	0.232	0.313	0.136515	0	0.440777	0.0910097	0.237935	0.0455049	0.339356
	1 | UM PV 251212	1	5	0.268	0.763	1.031	0.136515	0	0.440777	0.0910097	0.237935	0.0455049	0.339356
	1 | UM N 03	1	5	0.046	0.369	0.415	0.136515	0	0.440777	0.0910097	0.237935	0.0455049	0.339356
	1 | UM N 785V	1	5	0.312	0.52	0.832	0.136515	0	0.440777	0.0910097	0.237935	0.0455049	0.339356
	1 | AMNH 268369	1	5	0.177	0.073	0.25	0.136515	0	0.440777	0.0910097	0.237935	0.0455049	0.339356
	1 | TMM 40882-41	1	5	0.182	0.603	0.785	0.136515	0	0.440777	0.0910097	0.237935	0.0455049	0.339356
	1 | BP/1/3575	1	5	0.082	0.815	0.897	0.136515	0	0.440777	0.0910097	0.237935	0.0455049	0.339356
	1 | NHMUK R37054	1	5	0.396	0.864	1.26	0.136515	0	0.440777	0.0910097	0.237935	0.0455049	0.339356
	1 | NHCC LB 117	1	5	0.45	0.79	1.24	0.136515	0	0.440777	0.0910097	0.237935	0.0455049	0.339356
	1 | NMT RB581	1	5	0.327	1.003	1.33	0.136515	0	0.440777	0.0910097	0.237935	0.0455049	0.339356
	1 | IVPP 8275	1	5	0.09	0.24	0.33	0.136515	0	0.440777	0.0910097	0.237935	0.0455049	0.339356
	1 | IVPP 8685	1	5	0.06	0.11	0.17	0.136515	0	0.440777	0.0910097	0.237935	0.0455049	0.339356
	1 | NHCC LB44	1	5	0.105	0.72	0.825	0.136515	0	0.440777	0.0910097	0.237935	0.0455049	0.339356
	1 | FMNH 218598	1	5	0.082	0.543	0.625	0.136515	0	0.440777	0.0910097	0.237935	0.0455049	0.339356
	1 | FMNH 10694	1	5	0.15	0.632	0.782	0.136515	0	0.440777	0.0910097	0.237935	0.0455049	0.339356
	1 | BMNH 2858	1	5	0.081	0.19	0.271	0.136515	0	0.440777	0.0910097	0.237935	0.0455049	0.339356
	1 | BP/1/5088	1	5	0.118	0.463	0.581	0.136515	0	0.440777	0.0910097	0.237935	0.0455049	0.339356
	1 | BP/1/4778	1	5	0.124	0.656	0.78	0.136515	0	0.440777	0.0910097	0.237935	0.0455049	0.339356
	1 | FMNH UR 27	1	5	0.352	0.89	1.242	0.136515	0	0.440777	0.0910097	0.237935	0.0455049	0.339356
	1 | MCZ 3778	1	5	0.18	0.9	1.08	0.136515	0	0.440777	0.0910097	0.237935	0.0455049	0.339356
	1 | UFRGS PV833T	1	5	0.32	0.56	0.88	0.136515	0	0.440777	0.0910097	0.237935	0.0455049	0.339356
	1 | UFRGS PV1043	1	5	0.06	0.36	0.42	0.136515	0	0.440777	0.0910097	0.237935	0.0455049	0.339356
	1 | NHMUK 7090	1	5	0.12	0.46	0.58	0.136515	0	0.440777	0.0910097	0.237935	0.0455049	0.339356
	1 | MG 6807 (Gui Mam 2/81)	1	5	0.032	0.235	0.267	0.136515	0	0.440777	0.0910097	0.237935	0.0455049	0.339356
	Box plots (Specimens):
	Scattergrams (Specimens):

[truncated: 45 more sheets: Major minor axes data, RRX (ADM), RRX (ADmi), RRX (PDM), RRX (PDmi), RRX (LDM), RRX (LDmi), Data reproducibility, Normality tests, Histogram operator RA, Histograms Operator RD, Kolmogorov-Smirnov (dS_l), Kolmogorov-Smirnov (dS_p), Kolmogorov-Smirnov (dS_a), Kolmogorov-Smirnov (LS_l), Kolmogorov-Smirnov (LS_p), Kolmogorov-Smirnov (LS_a), Kolmogorov-Smirnov (Min_l ), Kolmogorov-Smirnov (min_p), Kolmogorov-Smirnov (min_a) …]
